# Supplementary material for: Bioinspired design of a robust d3-methylating agent
Source: PubMed Central journal article supplement — Sci Adv. 2020 May 8;6(19):eaba0946. doi: 10.1126/sciadv.aba0946 (PMC7209982; doi:10.1126/sciadv.aba0946), 2020-05-08

[advances.sciencemag.org/cgi/content/full/6/19/eaba0946/DC1](https://advances.sciencemag.org/cgi/content/full/6/19/eaba0946/DC1)

## Supplementary Materials for

### **Bioinspired design of a robust $d_3$ -methylating agent**

Minyan Wang, Yunfei Zhao, Yue Zhao, Zhuangzhi Shi\*

\*Corresponding author. Email: [shiz@nju.edu.cn](mailto:shiz@nju.edu.cn)

Published 8 May 2020, *Sci. Adv.* **6**, eaba0946 (2020)

DOI: [10.1126/sciadv.aba0946](https://doi.org/10.1126/sciadv.aba0946)

#### **This PDF file includes:**

Sections S1 to S10

## Section S1. The synthesis of trideuteromethyl reagent DMTT

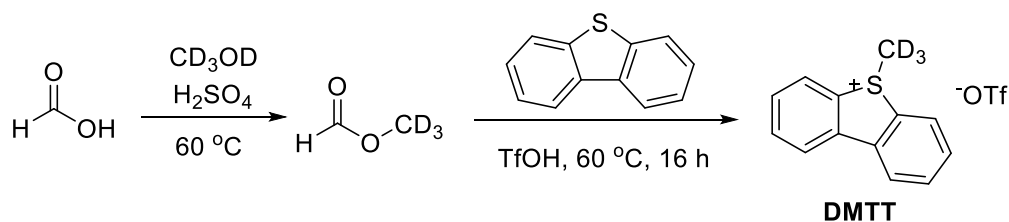

According to our patent, to a 50 mL round flask was added formic acid (7.8 mL, 150 mmol, 3 equiv, 88 wt.% aqueous solution),  $\text{CD}_3\text{OD}$  (20.2 mL, 500 mmol, 10 equiv,  $d = 0.89\text{ g/mL}$ , 99% D). Then sulphuric acid (8.8 mL, 165 mmol, 11 equiv, 98%) was added dropwise to the above solution with stirring. The reaction was heated at  $60\text{ }^\circ\text{C}$  and stirring for 4 h. The methyl- $d_3$  formate containing a small amount of deuterated methanol was directly distilled at atmospheric pressure ( $33\text{-}38\text{ }^\circ\text{C}$ ). The methyl- $d_3$  formate was used without further purification.

A 50 mL round flask was charged with dibenzothiophene (9.2 g, 50 mmol, 1 equiv) and above distilled methyl- $d_3$  formate. The mixture was stirred at  $0\text{ }^\circ\text{C}$  and  $\text{Tf}_2\text{O}$  (20 mL) was dropwise with stirring. Then the reaction was heated up to  $60\text{ }^\circ\text{C}$ . When the mixture became a clear solution, the reaction was poured into water (100 mL), extracted with  $\text{CH}_2\text{Cl}_2$  (50 mL  $\times$  3), dried with  $\text{MgSO}_4$ , and concentrated in vacuo. The obtained crude product was washed with  $\text{Et}_2\text{O}$  (50 mL  $\times$  3) and dried under vacuum to afford the trideuteromethyl reagent **DMTT** (16.0 g, 91%, 99% D).

5-(Methyl- $d_3$ )-5H-dibenzo[*b,d*]thiophen-5-ium trifluoromethanesulfonate **DMTT**:

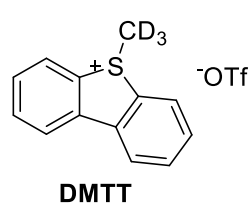

$^1\text{H NMR}$  (500 MHz,  $\text{CD}_3\text{CN}$ )  $\delta$  8.30 - 8.22 (m, 4 H), 7.93 - 7.85 (m, 2 H), 7.78 - 7.70 (m, 2 H).  $^{13}\text{C NMR}$  (126 MHz,  $\text{CD}_3\text{CN}$ )  $\delta$  140.2, 134.9, 132.0, 131.5, 128.6, 125.1. ATR-FTIR ( $\text{cm}^{-1}$ ): 3097, 3049, 2944, 1420, 1257, 1160, 1033, 755, 641. HRMS ( $\text{ESI}^+$ ) Calcd for  $\text{C}_{13}\text{H}_8\text{D}_3\text{S} [\text{M-OTf}]^+$ : 202.0764, found: 202.0767.

The corresponding non-deuterated product **MTT**:

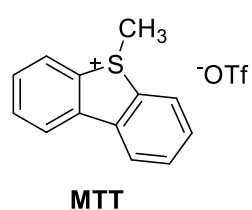

$^1\text{H}$  NMR (500 MHz,  $\text{CD}_3\text{CN}$ )  $\delta$  8.30 - 8.20 (m, 4 H), 7.93 - 7.84 (m, 2 H), 7.78 - 7.68 (m, 2 H), 3.33 (s, 3 H).  $^{13}\text{C}$  NMR (126 MHz,  $\text{CD}_3\text{CN}$ )  $\delta$  140.1, 134.8, 131.9, 131.6, 128.6, 125.1, 35.0.

## Section S2. Reaction development

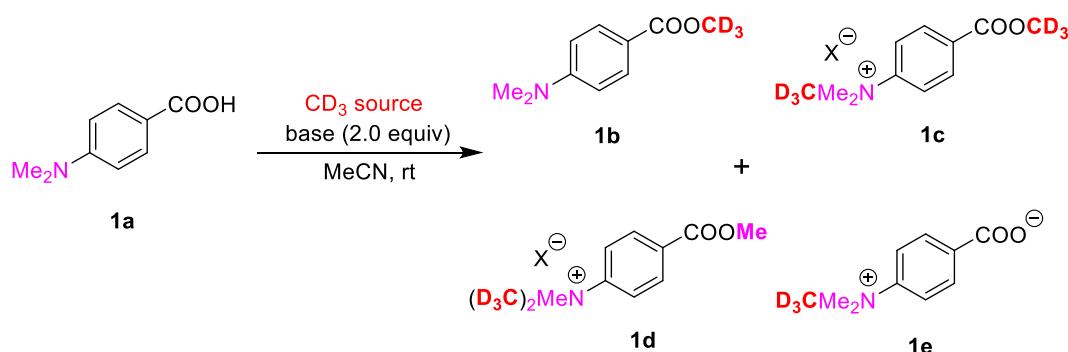

To a Schlenk tube was added carboxylic acid **1a** (0.2 mmol, 1.0 equiv),  $\text{CD}_3$  source, base (0.4 mmol, 2.0 equiv), and MeCN (2 mL). The reaction was stirring at room temperature for 12 h. Then the resulting mixture was concentrated in vacuo and the residue was purified by column chromatography to afford the corresponding product **1b** and side products **1c**, **1d**, and **1e**.

Methyl- $d_3$  4-(dimethylamino)benzoate (**1b**)

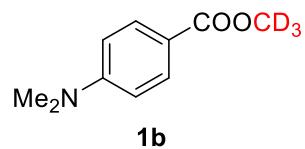

The reaction of 4-(dimethylamino)benzoic acid **1a** (27.4 mg, 0.2 mmol, 1.0 equiv), **DMTT** (70.2 mg, 0.2 mmol, 1.0 equiv),  $\text{K}_2\text{CO}_3$  (55.2 mg, 0.4 mmol, 2.0 equiv), and MeCN (2 mL) at room temperature for 12 h afford **1b** (32.7 mg, 90%, 99% D) as a white solid:  $^1\text{H}$  NMR (400 MHz,  $\text{CDCl}_3$ )  $\delta$  7.95 - 7.86 (m, 2 H), 6.68 - 6.59 (m, 2 H), 3.03 (s, 6 H).  $^{13}\text{C}$  NMR (101 MHz,  $\text{CDCl}_3$ )  $\delta$  167.4, 153.2, 131.2, 116.9, 110.6, 40.0.

ATR-FTIR (cm<sup>-1</sup>): 2948, 2903, 2824, 1702, 1620, 1436, 1284, 1190, 1133, 914, 828, 770, 743. HRMS (ESI<sup>+</sup>) Calcd for C<sub>10</sub>H<sub>11</sub>D<sub>3</sub>NO<sub>2</sub> [M+H]<sup>+</sup>: 183.1207, found: 183.1207.

The corresponding non-deuterated product:

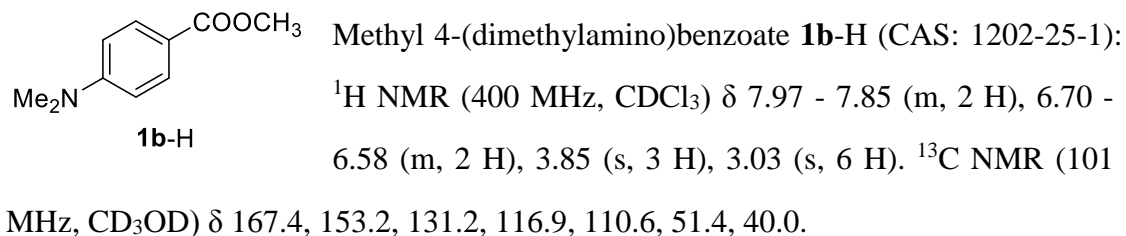

4-((Methoxy-*d*<sub>3</sub>)carbonyl)-*N,N*-dimethyl-*N*-(methyl-*d*<sub>3</sub>)benzenaminium (**1c**)

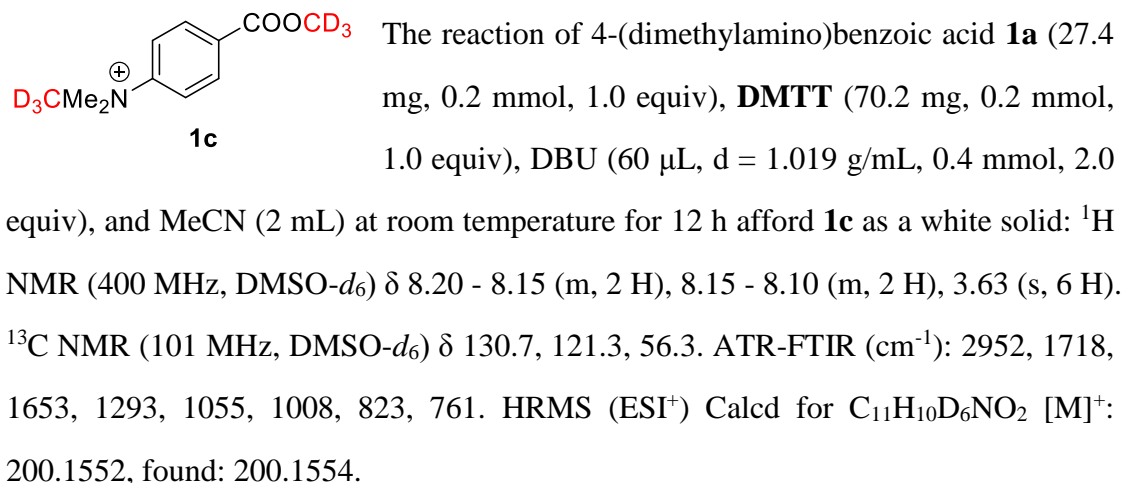

The corresponding non-deuterated product:

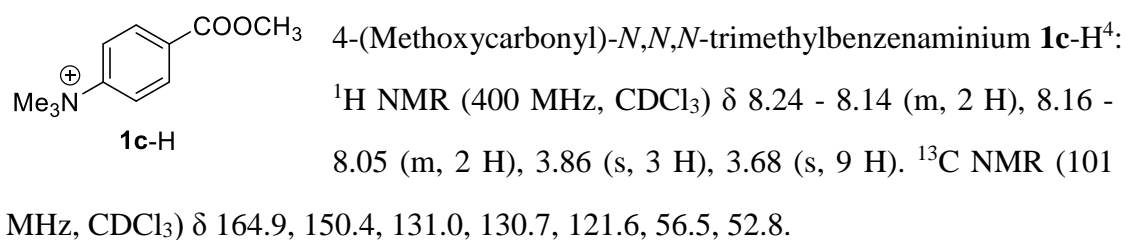

4-(methoxycarbonyl)-*N*-methyl-*N,N*-bis(methyl-*d*<sub>3</sub>)benzenaminium (**1d**)

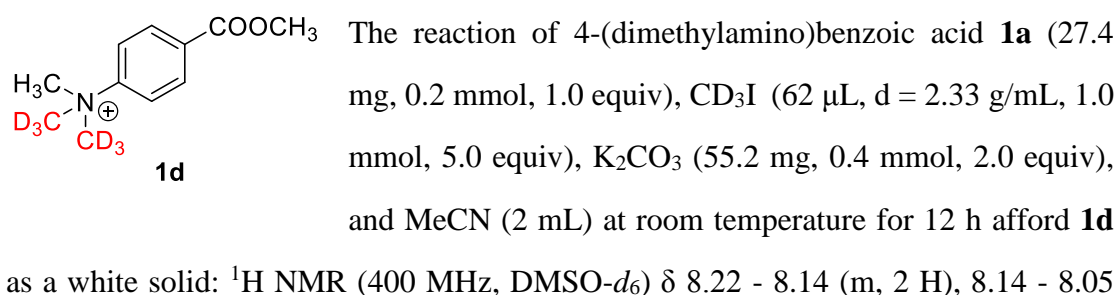



(m, 2 H), 3.86 (s, 3 H), 3.68 (s, 3 H).  $^{13}\text{C}$  NMR (101 MHz,  $\text{DMSO-}d_6$ )  $\delta$  164.9, 150.4, 130.9, 130.7, 121.6, 56.4, 52.8. ATR-FTIR ( $\text{cm}^{-1}$ ): 2948, 2933, 1719, 1658, 1295, 1010, 823, 761. HRMS ( $\text{ESI}^+$ ) Calcd for  $\text{C}_{11}\text{H}_{10}\text{D}_6\text{NO}_2$   $[\text{M}]^+$ : 200.1552, found: 200.1555.

### Section S3. Further investigations of compound **2a** with DMTT reagent.

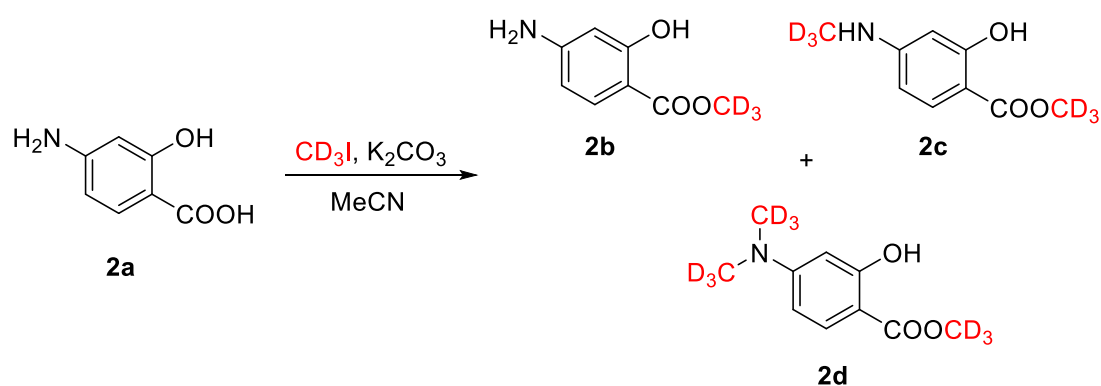

To a Schlenk tube was added carboxylic acid **2a** (30.6 mg, 0.2 mmol, 1.0 equiv),  $\text{CD}_3\text{I}$  (62.2  $\mu\text{L}$ ,  $d = 2.33$  g/mL, 1.0 mmol, 5.0 equiv),  $\text{K}_2\text{CO}_3$  (55.2 mg, 0.4 mmol, 2.0 equiv), and  $\text{MeCN}$  (2 mL). The reaction was stirring at room temperature for 12 h. Then the resulting mixture was concentrated in vacuo and the residue was purified by column chromatography to afford the byproduct **2b** (white solid, 8.9 mg, 26%, 99% D), **2c** (white solid, 6.7 mg, 18%, 99% D), and **2d** (white solid, 5.0 mg, 20%, 99% D).

#### Methyl- $d_3$ 4-amino-2-hydroxybenzoate (**2b**)

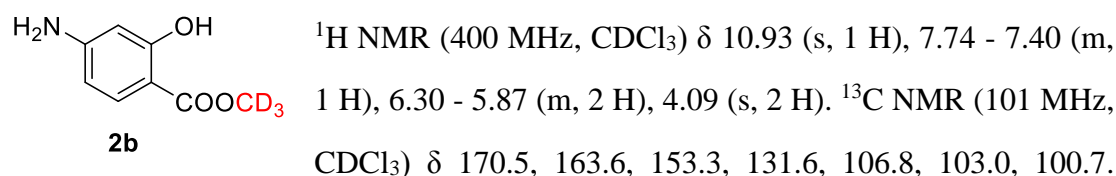

ATR-FTIR ( $\text{cm}^{-1}$ ): 3474, 3380, 3247, 2928, 1653, 1623, 1517, 1436, 1355, 1285, 1190, 1153, 1080, 914, 780, 749. HRMS ( $\text{ESI}^+$ ) Calcd for  $\text{C}_8\text{H}_7\text{D}_3\text{NO}_3$   $[\text{M}+\text{H}]^+$ : 171.0843, found: 171.0843.

The corresponding non-deuterated product:

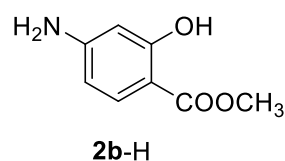

Methyl 4-amino-2-hydroxybenzoate **2b-H** (CAS: 4136-97-4):

$^1\text{H}$  NMR (400 MHz,  $\text{CDCl}_3$ )  $\delta$  10.93 (s, 1 H), 7.71 - 7.51 (m, 1 H), 6.23 - 6.01 (m, 2 H), 4.09 (s, 2 H), 3.87 (s, 3 H).  $^{13}\text{C}$

NMR (101 MHz,  $\text{CDCl}_3$ )  $\delta$  170.4, 163.6, 153.3, 131.6, 106.8, 103.0, 100.7, 51.7.

Methyl- $d_3$  2-hydroxy-4-((methyl- $d_3$ )amino)benzoate (**2c**)

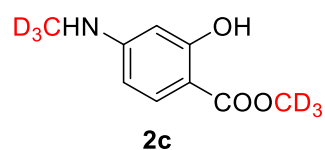

$^1\text{H}$  NMR (400 MHz,  $\text{CDCl}_3$ )  $\delta$  11.01 (s, 1 H), 7.59 (d,  $J$  = 8.6 Hz, 1 H), 6.23 - 5.90 (m, 2 H), 4.19 (s, 1 H).  $^{13}\text{C}$  NMR (101 MHz,  $\text{CDCl}_3$ )  $\delta$  170.6, 163.8, 155.3, 131.1, 105.4,

101.6, 97.2. ATR-FTIR ( $\text{cm}^{-1}$ ): 3415, 2993, 2948, 1680, 1635, 1528, 1349, 1282, 1149, 914, 749. HRMS (ESI $^+$ ) Calcd for  $\text{C}_9\text{H}_6\text{D}_6\text{NO}_3$  [ $\text{M}+\text{H}$ ] $^+$ : 188.1188, found: 188.1185.

The corresponding non-deuterated product:

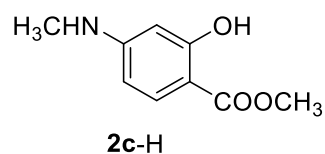

Methyl 2-hydroxy-4-(methylamino)benzoate **2c-H** (CAS: 1175090-85-3):  $^1\text{H}$  NMR (400 MHz,  $\text{CDCl}_3$ )  $\delta$  11.00 (s, 1 H), 7.59 (d,  $J$  = 8.5 Hz, 1 H), 6.20 - 5.97 (m, 2 H), 4.21 (s,

1 H), 3.87 (s, 3 H), 2.86 (d,  $J$  = 5.0 Hz, 3 H).  $^{13}\text{C}$  NMR (101 MHz,  $\text{CDCl}_3$ )  $\delta$  131.1, 105.4, 97.2, 51.6, 30.0.

Methyl- $d_3$  4-(bis(methyl- $d_3$ )amino)-2-hydroxybenzoate (**2d**)

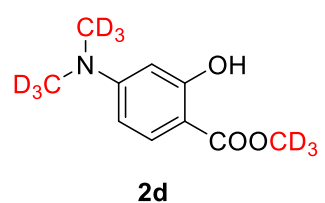

$^1\text{H}$  NMR (400 MHz,  $\text{CDCl}_3$ )  $\delta$  10.92 (s, 1 H), 7.64 (d,  $J$  = 9.0 Hz, 1 H), 6.20 (dd,  $J$  = 9.0, 2.5 Hz, 1 H), 6.13 (d,  $J$  = 2.5 Hz, 1 H).  $^{13}\text{C}$  NMR (101 MHz,  $\text{CDCl}_3$ )  $\delta$  163.2, 131.0, 104.0, 97.7. ATR-FTIR ( $\text{cm}^{-1}$ ): 3392, 2994, 2951, 1706,

1653, 1541, 1340, 1296, 914, 744. HRMS (ESI $^+$ ) Calcd for  $\text{C}_{10}\text{H}_5\text{D}_9\text{NO}_3$  [ $\text{M}+\text{H}$ ] $^+$ : 205.1533, found: 205.1534.

The corresponding non-deuterated product:

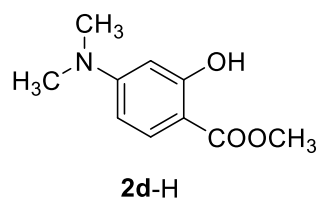

Methyl 4-(dimethylamino)-2-hydroxybenzoate **2d-H** (CAS: 27559-59-7):  $^1\text{H}$  NMR (400 MHz,  $\text{CDCl}_3$ )  $\delta$  10.91 (s, 1 H), 7.64 (d,  $J = 9.0$  Hz, 1 H), 6.21 (dd,  $J = 9.0, 2.6$  Hz, 1 H), 6.14 (d,  $J = 2.6$  Hz, 1 H), 3.88 (s, 3 H), 3.02 (s, 6 H).  $^{13}\text{C}$  NMR (101 MHz,  $\text{CDCl}_3$ )  $\delta$  130.9, 104.0, 97.8, 51.5, 40.0.

## Section S4. The synthesis of products **b**

### General Procedure A:

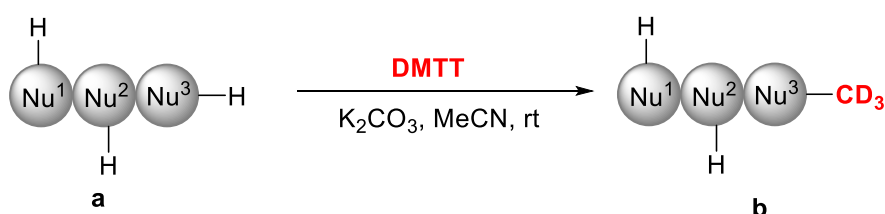

To a Schlenk tube was added carboxylic acid **a** (0.2 mmol, 1.0 equiv), **DMTT**,  $\text{K}_2\text{CO}_3$ , and MeCN (2 mL). The reaction was stirring at room temperature for 12 h. Then the resulting mixture was concentrated in vacuo and the residue was purified by column chromatography to afford the corresponding product **b**.

### Methyl- $d_3$ 2-cyclopentyl-2-hydroxy-2-phenylacetate (**3b**)

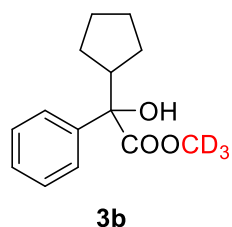

Following the general procedure A, the reaction of **3a** (44.0 mg, 0.2 mmol, 1.0 equiv), **DMTT** (70.2 mg, 0.2 mmol, 1.0 equiv),  $\text{K}_2\text{CO}_3$  (55.2 mg, 0.4 mmol, 2.0 equiv), and MeCN (2 mL) at room temperature for 12 h afford **3b** (46.9 mg, 99%, 99% D) as a colorless oil:  $^1\text{H}$  NMR (400 MHz,  $\text{CDCl}_3$ )  $\delta$  7.69 - 7.60 (m, 2 H), 7.38 - 7.29 (m, 2 H), 7.29 - 7.22 (m, 1 H), 3.74 (s, 1 H), 2.95 - 2.85 (m, 1 H), 1.73 - 1.40 (m, 6 H), 1.39 - 1.29 (m, 2H).  $^{13}\text{C}$  NMR (101 MHz,  $\text{CDCl}_3$ )  $\delta$  176.1, 141.7, 128.0, 127.4, 125.9, 79.2, 47.2, 26.9, 26.31, 26.25, 25.9. ATR-FTIR ( $\text{cm}^{-1}$ ): 3512, 2954, 2868, 1725, 1445, 1253,

1173, 740, 698. HRMS (ESI<sup>+</sup>) Calcd for C<sub>14</sub>H<sub>15</sub>D<sub>3</sub>O<sub>3</sub>Na [M+Na]<sup>+</sup>: 260.1336, found: 260.1333.

The corresponding non-deuterated product:

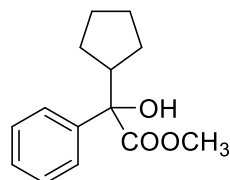

**3b-H**

Methyl 2-cyclopentyl-2-hydroxy-2-phenylacetate **3b-H** (CAS: 19833-96-6): <sup>1</sup>H NMR (400 MHz, CDCl<sub>3</sub>) δ 7.68 - 7.61 (m, 2 H), 7.37 - 7.30 (m, 2 H), 7.29 - 7.23 (m, 1 H), 3.76 (s, 3 H), 3.73 (d, *J* = 0.7 Hz, 1 H), 2.95 - 2.85 (m, 1 H), 1.73 - 1.40 (m, 6 H), 1.38 - 1.29 (m, 2H). <sup>13</sup>C NMR (101 MHz, CDCl<sub>3</sub>) δ 176.1, 141.7, 128.0, 127.4, 125.9, 79.2, 53.2, 47.2, 26.9, 26.33, 26.26, 25.9.

Methyl-*d*<sub>3</sub> 4-aminobenzoate (**4b**)

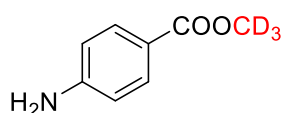

**4b**

Following the general procedure A, the reaction of **4a** (27.4 mg, 0.2 mmol, 1.0 equiv), **DMTT** (70.2 mg, 0.2 mmol, 1.0 equiv), K<sub>2</sub>CO<sub>3</sub> (55.2 mg, 0.4 mmol, 2.0 equiv), and MeCN (2 mL) at room temperature for 12 h afford **4b** (21.6 mg, 70%, 99% D) as a colorless oil: <sup>1</sup>H NMR (400 MHz, CDCl<sub>3</sub>) δ 7.84 (d, *J* = 8.7 Hz, 2 H), 6.63 (d, *J* = 8.7 Hz, 2 H), 4.09 (bs, 2 H). <sup>13</sup>C NMR (101 MHz, CDCl<sub>3</sub>) δ 167.2, 150.8, 131.5, 119.6, 113.7. ATR-FTIR (cm<sup>-1</sup>): 3676, 3080, 1685, 1508, 1457, 1288, 773, 669. HRMS (ESI<sup>+</sup>) Calcd for C<sub>8</sub>H<sub>7</sub>D<sub>3</sub>NO<sub>2</sub> [M+H]<sup>+</sup>: 155.0894, found: 155.0890.

The corresponding non-deuterated product:

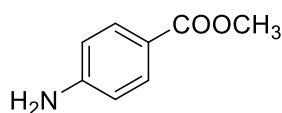

**4b-H**

Methyl 4-aminobenzoate **4b-H** (CAS: 619-45-4): <sup>1</sup>H NMR (400 MHz, CDCl<sub>3</sub>) δ 7.84 (d, *J* = 8.7 Hz, 2 H), 6.63 (d, *J* = 8.7 Hz, 2 H), 4.07 (bs, 2 H), 3.85 (s, 3 H). <sup>13</sup>C NMR (101 MHz, CDCl<sub>3</sub>) δ 167.2, 150.8, 131.6, 119.7, 113.8, 51.6.

Methyl-*d*<sub>3</sub> 2-(1*H*-indol-3-yl)acetate (**5b**)

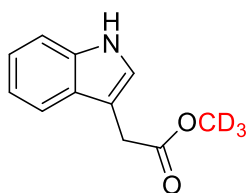

**5b**

Following the general procedure A, the reaction of **5a** (35.0 mg, 0.2 mmol, 1.0 equiv), **DMTT** (70.2 mg, 0.2 mmol, 1.0 equiv),  $K_2CO_3$  (55.2 mg, 0.4 mmol, 2.0 equiv), and MeCN (2 mL) at room temperature for 12 h afford **5b** (32.3 mg, 84%, 99% D) as a colorless oil:  $^1H$  NMR (400 MHz,  $CDCl_3$ )  $\delta$  8.16 (s, 1 H), 7.66 - 7.61 (m, 1 H), 7.35 - 7.31 (m, 1 H), 7.25 - 7.13 (m, 2 H), 7.12 - 7.08 (m, 1 H), 3.81 (d,  $J = 0.9$  Hz, 2 H).  $^{13}C$  NMR (101 MHz,  $CDCl_3$ )  $\delta$  172.6, 136.1, 127.2, 123.1, 122.2, 119.7, 118.8, 111.2, 108.3, 31.1. ATR-FTIR ( $cm^{-1}$ ): 3408, 2950, 1720, 1456, 1431, 1163, 1094, 1007, 743, 587. HRMS (ESI<sup>+</sup>) Calcd for  $C_{11}H_8D_3NO_2Na$  [ $M+Na$ ]<sup>+</sup>: 215.0870, found: 215.0872.

The corresponding non-deuterated product:

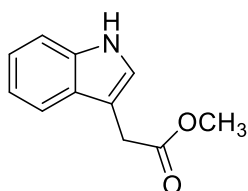

**5b-H**

Methyl 2-(1*H*-indol-3-yl)acetate **5b-H** (CAS: 1912-33-0):  $^1H$  NMR (400 MHz,  $CDCl_3$ )  $\delta$  8.14 (s, 1 H), 7.67 - 7.58 (m, 1 H), 7.37 - 7.31 (m, 1 H), 7.24 - 7.15 (m, 2 H), 7.14-7.11 (m, 1 H), 3.80 (d,  $J = 0.9$  Hz, 2 H), 3.72 (s, 3 H).  $^{13}C$  NMR (101 MHz,  $CDCl_3$ )  $\delta$  172.6, 136.1, 127.2, 123.1, 122.2, 119.6, 118.8, 111.2, 108.3, 52.0, 31.1.

#### Methyl-*d*<sub>3</sub> (tert-butoxycarbonyl)valinate (**6b**)

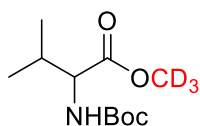

**6b**

Following the general procedure A, the reaction of **6a** (43.4 mg, 0.2 mmol, 1.0 equiv), **DMTT** (70.2 mg, 0.2 mmol, 1.0 equiv),  $K_2CO_3$  (55.2 mg, 0.4 mmol, 2.0 equiv), and MeCN (2 mL) at room temperature for 12 h afford **6b** (41.5 mg, 89%, 99% D) as a colorless oil:  $^1H$  NMR (400 MHz,  $CDCl_3$ )  $\delta$  5.02 (d,  $J = 9.2$  Hz, 1 H), 4.20 (dd,  $J = 9.2, 4.9$  Hz, 1 H), 2.17 - 2.02 (m, 1 H), 1.42 (s, 9 H), 0.93 (d,  $J = 6.8$  Hz, 3 H), 0.87 (d,  $J = 6.9$  Hz, 3 H).  $^{13}C$  NMR (101 MHz,  $CDCl_3$ )  $\delta$  172.9, 155.6, 79.7, 58.5, 31.3, 28.3, 18.9, 17.6. ATR-FTIR ( $cm^{-1}$ ): 3369, 2970, 2880, 1715, 1504, 1366, 1163, 1014. HRMS (ESI<sup>+</sup>) Calcd for  $C_{11}H_{18}D_3NO_4Na$  [ $M+Na$ ]<sup>+</sup>: 257.1551, found: 257.1552.

The corresponding non-deuterated product:

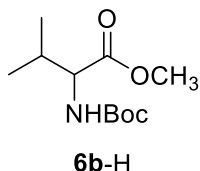

Methyl (tert-butoxycarbonyl)valinate **6b-H** (CAS: 145618-65-1):  $^1\text{H}$  NMR (400 MHz,  $\text{CDCl}_3$ )  $\delta$  5.02 (d,  $J = 9.2$  Hz, 1 H), 4.20 (dd,  $J = 9.2, 4.9$  Hz, 1 H), 3.72 (s, 3 H), 2.16 - 2.04 (m, 1 H), 1.43 (s, 9 H), 0.94 (d,  $J = 6.9$  Hz, 3 H), 0.87 (d,  $J = 6.9$  Hz, 3 H).  $^{13}\text{C}$  NMR (101 MHz,  $\text{CDCl}_3$ )  $\delta$  172.9, 155.6, 79.7, 58.5, 52.0, 31.3, 28.3, 18.9, 17.6.

Methyl- $d_3$

(*E*)-6-(4-hydroxy-6-methoxy-7-methyl-3-oxo-1,3-dihydroisobenzofuran-5-yl)-4-methylhex-4-enoate (**7b**)

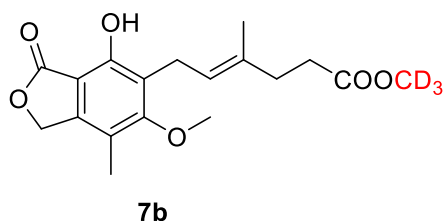

Following the general procedure A, the reaction of **7a** (64.0 mg, 0.2 mmol, 1.0 equiv), **DMTT** (70.2 mg, 0.2 mmol, 1.0 equiv),  $\text{K}_2\text{CO}_3$  (55.2 mg, 0.4 mmol, 2.0 equiv), and MeCN (2 mL) at room temperature for 12 h afford **7b** (58.3 mg, 86%, 99% D) as a white solid:  $^1\text{H}$  NMR (400 MHz,  $\text{CDCl}_3$ )  $\delta$  7.65 (s, 1 H), 5.27 - 5.19 (m, 1 H), 5.18 (s, 2 H), 3.74 (s, 3 H), 3.36 (d,  $J = 7.0$  Hz, 2 H), 2.42 - 2.34 (m, 2 H), 2.32 - 2.24 (m, 2 H), 2.13 (s, 3 H), 1.78 (s, 3 H).  $^{13}\text{C}$  NMR (101 MHz,  $\text{CDCl}_3$ )  $\delta$  173.8, 172.8, 163.6, 153.5, 143.9, 134.1, 122.7, 122.0, 116.7, 106.3, 70.0, 60.9, 34.5, 32.8, 22.5, 16.0, 11.5. ATR-FTIR ( $\text{cm}^{-1}$ ): 3428, 2947, 2852, 1707, 1625, 1454, 1367, 1136, 1076, 1030, 970. HRMS ( $\text{ESI}^+$ ) Calcd for  $\text{C}_{18}\text{H}_{20}\text{D}_3\text{O}_6$  [ $\text{M}+\text{H}$ ] $^+$ : 338.1677, found: 338.1677.

The corresponding non-deuterated product:

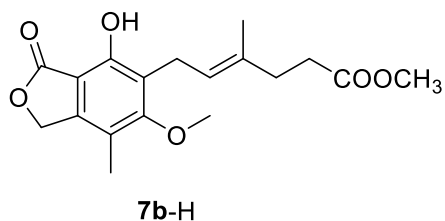

Methyl (*E*)-6-(4-hydroxy-6-methoxy-7-methyl-3-oxo-1,3-dihydroisobenzofuran-5-yl)-4-methylhex-4-enoate **7b-H** (CAS: 31858-66-9):  $^1\text{H}$  NMR (400 MHz,  $\text{CDCl}_3$ )  $\delta$  7.65 (s, 1 H), 5.26 - 5.19 (m, 1 H), 5.17 (s, 2 H), 3.74 (s, 3 H), 3.59 (s, 3 H), 3.36 (d,  $J = 7.0$  Hz, 2 H), 2.42 - 2.34 (m, 2 H), 2.31 - 2.24 (m, 2 H), 2.13 (s, 3 H), 1.78

(s, 3 H).  $^{13}\text{C}$  NMR (101 MHz,  $\text{CDCl}_3$ )  $\delta$  173.8, 172.9, 163.6, 153.6, 144.0, 134.1, 122.7, 122.1, 116.7, 106.3, 70.0, 61.0, 51.4, 34.6, 32.8, 22.6, 16.1, 11.5.

Methyl- $d_3$

(*R*)-4-((3*R*,5*S*,8*R*,9*S*,10*S*,13*R*,14*S*,17*R*)-3-hydroxy-10,13-dimethylhexadecahydro-1*H*-cyclopenta[*a*]phenanthren-17-yl)pentanoate (**8b**)

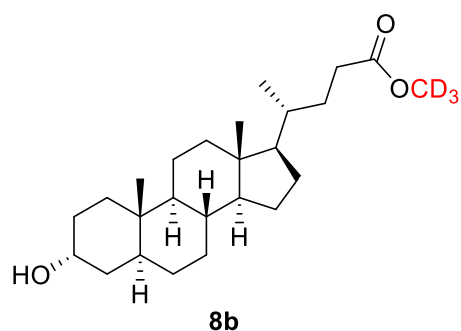

Following the general procedure A, the reaction of **8a** (75.2 mg, 0.2 mmol, 1.0 equiv), **DMTT** (70.2 mg, 0.2 mmol, 1.0 equiv),  $\text{K}_2\text{CO}_3$  (55.2 mg, 0.4 mmol, 2.0 equiv), and MeCN (2 mL) at room temperature for 12 h afford **8b** (63.8 mg, 81%, 99% D) as a white solid:  $^1\text{H}$  NMR (400

MHz,  $\text{CDCl}_3$ )  $\delta$  3.68 - 3.48 (m, 1 H), 2.38 - 2.27 (m, 1 H), 2.25 - 2.14 (m, 1 H), 1.97 - 1.90 (m, 1 H), 1.90 - 1.70 (m, 6 H), 1.69 - 1.59 (m, 1 H), 1.59 - 1.44 (m, 2 H), 1.44 - 1.17 (m, 11 H), 1.17 - 0.93 (m, 6 H), 0.92 - 0.86 (m, 6 H), 0.62 (s, 3 H).  $^{13}\text{C}$  NMR (101 MHz,  $\text{CDCl}_3$ )  $\delta$  174.8, 71.7, 56.4, 55.9, 42.7, 42.0, 40.4, 40.1, 36.4, 35.8, 35.3, 34.5, 31.0, 30.9, 30.5, 28.1, 27.1, 26.4, 24.1, 23.3, 20.8, 18.2, 12.0. ATR-FTIR ( $\text{cm}^{-1}$ ): 3344, 2900, 2863, 1740, 1448, 1373, 1167, 1038. HRMS (ESI $^+$ ) Calcd for  $\text{C}_{25}\text{H}_{39}\text{D}_3\text{O}_3\text{Na}$  [ $\text{M}+\text{Na}$ ] $^+$ : 416.3214, found: 416.3216.

The corresponding non-deuterated product:

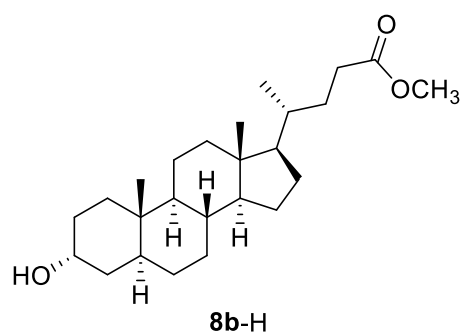

Methyl  
(*R*)-4-((3*R*,5*S*,8*R*,9*S*,10*S*,13*R*,14*S*,17*R*)-3-hydroxy-10,13-dimethylhexadecahydro-1*H*-cyclopenta[*a*]phenanthren-17-yl)pentanoate **8b-H** (CAS: 1249-75-8):  $^1\text{H}$  NMR (400 MHz,  $\text{CDCl}_3$ )  $\delta$  3.64 (s, 3 H), 3.63 - 3.54 (m, 1 H), 2.40 - 2.27 (m, 1 H), 2.27 - 2.13 (m, 1 H), 1.99 - 1.89 (m, 1 H), 1.90 - 1.68 (m, 6 H), 1.69 - 1.58 (m, 1 H), 1.59 - 1.45 (m, 2 H), 1.44 - 1.16 (m, 11 H), 1.17 - 0.93 (m, 6 H), 0.93 - 0.85 (m, 6

H), 0.62 (s, 3 H).  $^{13}\text{C}$  NMR (101 MHz,  $\text{CDCl}_3$ )  $\delta$  174.7, 71.7, 56.4, 55.9, 51.4, 42.7, 42.0, 40.4, 40.1, 36.4, 35.8, 35.3, 34.5, 31.0, 30.9, 30.5, 28.1, 27.1, 26.4, 24.2, 23.3, 20.8, 18.2, 12.0.

Methyl- $d_3$

(2*S*,4*aS*,6*aS*,6*bR*,8*aR*,10*S*,12*aS*,12*bR*,14*bR*)-10-hydroxy-2,4*a*,6*a*,6*b*,9,9,12*a*-heptamethyl-13-oxo-1,2,3,4,4*a*,5,6,6*a*,6*b*,7,8,8*a*,9,10,11,12,12*a*,12*b*,13,14*b*-icosahydricene-2-carboxylate (**9b**)

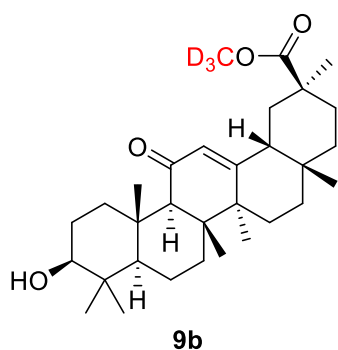

Following the general procedure A, the reaction of **9a** (94.0 mg, 0.2 mmol, 1.0 equiv), **DMTT** (70.2 mg, 0.2 mmol, 1.0 equiv),  $\text{K}_2\text{CO}_3$  (55.2 mg, 0.4 mmol, 2.0 equiv), and MeCN (2 mL) at room temperature for 12 h afford **9b** (93.9 mg, 96%, 99% D) as a white solid:  $^1\text{H}$  NMR (400 MHz,  $\text{CDCl}_3$ )  $\delta$  5.62 (s, 1 H), 3.24 - 3.12 (m, 1 H),

2.81 - 2.68 (m, 1 H), 2.30 (s, 1 H), 2.08 - 1.72 (m, 6 H), 1.65 - 1.54 (m, 5 H), 1.40 - 1.24 (m, 8 H), 1.18 - 1.06 (m, 11 H), 1.02 - 0.90 (m, 4 H), 0.77 (s, 6 H), 0.66 (d,  $J$  = 11.5 Hz, 1 H).  $^{13}\text{C}$  NMR (101 MHz,  $\text{CDCl}_3$ )  $\delta$  200.2, 176.9, 169.1, 128.4, 78.6, 61.7, 54.8, 48.3, 45.3, 43.9, 43.1, 41.0, 39.0, 37.7, 37.0, 32.7, 31.7, 31.0, 28.4, 28.2, 28.0, 27.2, 26.4, 26.3, 23.3, 18.6, 17.4, 16.3, 15.5. ATR-FTIR ( $\text{cm}^{-1}$ ): 3343, 2942, 2870, 1723, 1657, 1461, 1386, 1215, 1160, 1042, 913, 741. HRMS (ESI<sup>+</sup>) Calcd for  $\text{C}_{31}\text{H}_{45}\text{D}_3\text{O}_4\text{Na}$  [ $\text{M}+\text{Na}$ ]<sup>+</sup>: 510.3633, found: 510.3628.

The corresponding non-deuterated product:

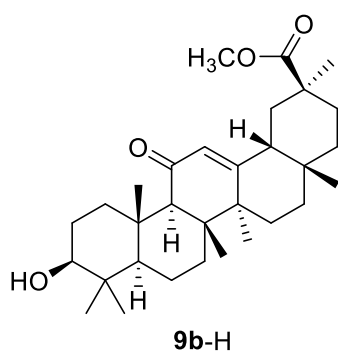

Methyl  
(2*S*,4*aS*,6*aS*,6*bR*,8*aR*,10*S*,12*aS*,12*bR*,14*bR*)-10-hydroxy-2,4*a*,6*a*,6*b*,9,9,12*a*-heptamethyl-13-oxo-1,2,3,4,4*a*,5,6,6*a*,6*b*,7,8,8*a*,9,10,11,12,12*a*,12*b*,13,14*b*-icosahydricene-2-carboxylate **9b-H** (CAS: 1477-44-7):  $^1\text{H}$  NMR (400 MHz,  $\text{CDCl}_3$ )  $\delta$  5.63 (s, 1 H), 3.66 (s, 3 H), 3.27 - 3.13



(m, 1 H), 2.84 - 2.70 (m, 1 H), 2.31 (s, 1 H), 2.11 - 1.72 (m, 6 H), 1.69 - 1.52 (m, 5 H), 1.45 - 1.26 (m, 8 H), 1.20 - 1.06 (m, 10 H), 1.03 - 0.90 (m, 5 H), 0.78 (s, 6 H), 0.67 (d,  $J = 11.9$  Hz, 1 H).  $^{13}\text{C}$  NMR (101 MHz,  $\text{CDCl}_3$ )  $\delta$  200.2, 176.9, 169.1, 128.5, 78.7, 61.7, 54.9, 51.7, 48.3, 45.3, 44.0, 43.1, 41.0, 39.1, 37.7, 37.0, 32.7, 31.8, 31.1, 28.5, 28.3, 28.0, 27.2, 26.4, 26.4, 23.3, 18.6, 17.4, 16.3, 15.5.

Methyl- $d_3$

(3*R*,5*R*)-7-(2-(4-fluorophenyl)-5-isopropyl-3-phenyl-4-(phenylcarbamoyl)-1*H*-pyrrol-1-yl)-3,5-dihydroxyheptanoate (**10b**)

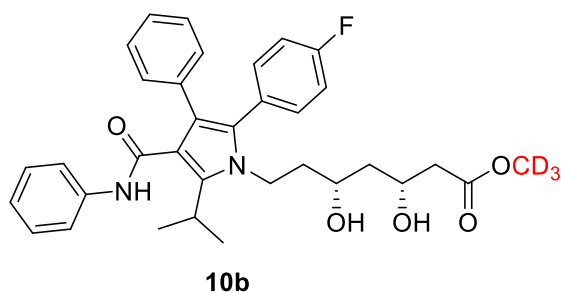

Following the general procedure A, the reaction of **10a** (111.7 mg, 0.2 mmol, 1.0 equiv), **DMTT** (70.2 mg, 0.2 mmol, 1.0 equiv),  $\text{K}_2\text{CO}_3$  (55.2 mg, 0.4 mmol, 2.0 equiv), and MeCN (2 mL) at room temperature for 12 h afford **10b** (50.9

mg, 44%, 99% D) as a white solid:  $^1\text{H}$  NMR (500 MHz,  $\text{CDCl}_3$ )  $\delta$  7.22 - 7.13 (m, 9 H), 7.06 (d,  $J = 8.0$  Hz, 2 H), 7.03 - 6.96 (m, 3 H), 6.86 (s, 1 H), 4.24 - 4.04 (m, 2 H), 4.04 - 3.88 (m, 1 H), 3.82 - 3.71 (m, 1 H), 3.70 - 3.48 (m, 3 H), 2.41 (d,  $J = 6.1$  Hz, 2 H), 1.74 - 1.58 (m, 3 H), 1.54 (d,  $J = 7.1$  Hz, 6 H).  $^{13}\text{C}$  NMR (126 MHz,  $\text{CDCl}_3$ )  $\delta$  173.0, 164.8, 162.2 (d,  $J = 247.5$  Hz), 141.5, 138.3, 134.6, 133.2 (d,  $J = 8.1$  Hz), 130.5, 128.69, 128.65, 128.3, 126.5, 123.5, 121.8, 119.6, 115.4 (d,  $J = 21.4$  Hz), 69.6, 68.9, 41.7, 41.2, 41.1, 39.1, 26.1, 21.8, 21.7.  $^{19}\text{F}$  NMR (471 MHz,  $\text{CDCl}_3$ )  $\delta$  -113.5. ATR-FTIR ( $\text{cm}^{-1}$ ): 3416, 2958, 2924, 2854, 1727, 1657, 1509, 1313, 1156, 909, 733. HRMS (ESI $^+$ ) Calcd for  $\text{C}_{34}\text{H}_{34}\text{D}_3\text{FN}_2\text{O}_5\text{Na}$   $[\text{M}+\text{Na}]^+$ : 598.2767, found: 598.2764.

The corresponding non-deuterated product:

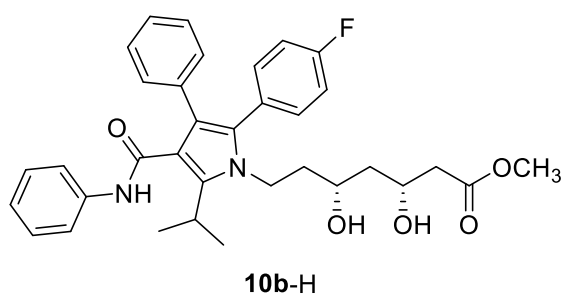

Methyl

(3*R*,5*R*)-7-(2-(4-fluorophenyl)-5-isopropyl-3-phenyl-4-(phenylcarbamoyl)-1*H*-

pyrrol-1-yl)-3,5-dihydroxyheptanoate **10b-H**<sup>5</sup>: <sup>1</sup>H NMR (400 MHz, CDCl<sub>3</sub>) δ 7.22 - 7.12 (m, 9 H), 7.06 (d, *J* = 8.0 Hz, 2 H), 7.03 - 6.94 (m, 3 H), 6.87 (s, 1 H), 4.24 - 4.04 (m, 2 H), 4.03 - 3.86 (m, 1 H), 3.80 - 3.65 (m, 5 H), 3.62 - 3.51 (m, 2 H), 2.41 (d, *J* = 6.1 Hz, 2 H), 1.72 - 1.61 (m, 3 H), 1.54 (d, *J* = 7.1 Hz, 6 H). <sup>13</sup>C NMR (101 MHz, CDCl<sub>3</sub>) δ 173.0, 164.8, 162.2 (d, *J* = 247.6 Hz), 141.5, 138.3, 134.6, 133.2 (d, *J* = 8.1 Hz), 130.4, 128.7, 128.6, 128.3, 126.5, 123.5, 121.8, 119.6, 115.4 (d, *J* = 21.4 Hz), 69.6, 68.9, 51.9, 41.7, 41.2, 41.1, 39.0, 26.1, 21.8, 21.7. <sup>19</sup>F NMR (376 MHz, CDCl<sub>3</sub>) δ -113.5.

### Methyl-*d*<sub>3</sub>

(1*S*,2*S*,4*aR*,7*S*,9*aS*,10*S*,10*aR*)-2,7-dihydroxy-1-methyl-8-methylene-13-oxo-1,2,4b,5,6,7,8,9,10,10*a*-decahydro-4*a*,1-(epoxymethano)-7,9*a*-methanobenzo[*a*]azulene-10-carboxylate (**11b**)

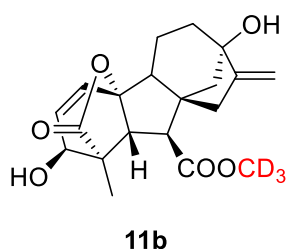

Following the general procedure A, the reaction of **11a** (69.2 mg, 0.2 mmol, 1.0 equiv), **DMTT** (70.2 mg, 0.2 mmol, 1.0 equiv), K<sub>2</sub>CO<sub>3</sub> (55.2 mg, 0.4 mmol, 2.0 equiv), and MeCN (2 mL) at room temperature for 12 h afford **11b** (64.3 mg, 89%, 99% D) as a white solid: <sup>1</sup>H NMR (400 MHz, CDCl<sub>3</sub>) δ 6.32 (dd, *J* = 9.3, 0.9 Hz, 1 H), 5.91 (dd, *J* = 9.3, 3.7 Hz, 1 H), 5.28 (dd, *J* = 3.1, 1.9 Hz, 1 H), 4.97 (d, *J* = 2.2 Hz, 1 H), 4.16 (dd, *J* = 7.3, 3.7 Hz, 1 H), 3.21 (d, *J* = 10.7 Hz, 1 H), 2.79 (d, *J* = 10.7 Hz, 1 H), 2.26 - 2.12 (m, 2 H), 2.12 - 2.01 (m, 2 H), 2.00 - 1.88 (m, 3 H), 1.88 - 1.79 (m, 1 H), 1.79 - 1.70 (m, 1 H), 1.72 - 1.63 (m, 2 H), 1.25 (s, 3 H). <sup>13</sup>C NMR (101 MHz, CDCl<sub>3</sub>) δ 156.9, 133.0, 132.3, 107.6, 78.2, 69.8, 53.4, 52.8, 51.1, 50.6, 50.5, 44.8, 43.1, 38.2, 17.0, 14.4. ATR-FTIR (cm<sup>-1</sup>): 3375, 2941, 1764, 1748, 1267, 753. EI-MS (*m/z*, relative intensity): 301 (M<sup>+</sup>-COOCD<sub>3</sub>, 16), 239 (34), 238 (100), 223 (24), 209 (27), 195 (27), 193 (23), 181 (20), 180 (22), 165 (37), 155 (42), 152 (26), 141 (24), 128 (22), 115 (21). HRMS (ESI<sup>+</sup>) Calcd for C<sub>20</sub>H<sub>21</sub>D<sub>3</sub>O<sub>6</sub>Na [M+Na]<sup>+</sup>: 386.1653, found: 386.1651.

The corresponding non-deuterated product:

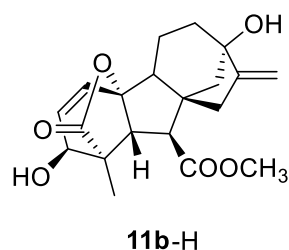

Methyl  
(1*S*,2*S*,4*aR*,7*S*,9*aS*,10*S*,10*aR*)-2,7-dihydroxy-1-methyl-8-methyl-13-oxo-1,2,4*b*,5,6,7,8,9,10,10*a*-decahydro-4*a*,1-(epoxymethano)-7,9*a*-methanobenzo[*a*]azulene-10-carboxylate

**11b-H** (CAS: 510-50-9):  $^1\text{H NMR}$  (400 MHz,  $\text{CDCl}_3$ )  $\delta$  6.32

(dd,  $J = 9.3, 0.9$  Hz, 1 H), 5.91 (dd,  $J = 9.3, 3.7$  Hz, 1 H), 5.28 (dd,  $J = 3.0, 1.9$  Hz, 1 H), 4.97 (d,  $J = 2.1$  Hz, 1 H), 4.16 (dd,  $J = 7.1, 3.7$  Hz, 1 H), 3.74 (s, 3 H), 3.21 (d,  $J = 10.7$  Hz, 1 H), 2.79 (d,  $J = 10.7$  Hz, 1 H), 2.26 - 2.12 (m, 2 H), 2.12 - 2.01 (m, 2 H), 2.00 - 1.87 (m, 3 H), 1.86 - 1.78 (m, 1 H), 1.80 - 1.70 (m, 1 H), 1.72 - 1.62 (m, 2 H), 1.25 (s, 3 H).  $^{13}\text{C NMR}$  (101 MHz,  $\text{CDCl}_3$ )  $\delta$  178.3, 172.5, 156.9, 133.0, 132.3, 107.6, 90.4, 78.2, 69.8, 53.4, 52.8, 52.2, 51.1, 50.6, 50.5, 44.8, 43.1, 38.2, 17.0, 14.4.

Methyl- $d_3$  (3*R*,4*S*,5*R*)-3,4,5-trihydroxycyclohex-1-ene-1-carboxylate (**12b**)

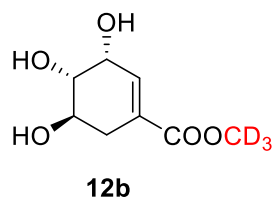

Following the general procedure A, the reaction of **12a** (34.8 mg, 0.2 mmol, 1.0 equiv), **DMTT** (70.2 mg, 0.2 mmol, 1.0 equiv),  $\text{K}_2\text{CO}_3$  (55.2 mg, 0.4 mmol, 2.0 equiv), and MeCN (2 mL) at room temperature for 12 h afford **12b** (35.2 mg, 92%,

99% D) as a white solid:  $^1\text{H NMR}$  (400 MHz,  $\text{DMSO-}d_6$ )  $\delta$  6.64 - 6.59 (m, 1 H), 4.97 - 4.80 (m, 2 H), 4.67 (d,  $J = 4.2$  Hz, 1 H), 4.28 - 4.16 (m, 1 H), 3.92 - 3.79 (m, 1 H), 3.62 - 3.51 (m, 1 H), 2.47 - 2.36 (m, 1 H), 2.11 - 1.99 (m, 1 H).  $^{13}\text{C NMR}$  (101 MHz,  $\text{DMSO-}d_6$ )  $\delta$  166.8, 139.9, 127.4, 70.0, 66.9, 65.5, 29.6. ATR-FTIR ( $\text{cm}^{-1}$ ): 3430, 1653, 1255, 1027, 825, 764, 626. HRMS (ESI $^+$ ) Calcd for  $\text{C}_8\text{H}_9\text{D}_3\text{O}_5\text{Na}$   $[\text{M}+\text{Na}]^+$ : 214.0765, found: 214.0763.

The gram scale reaction of **12b**:

The reaction of **12a** (0.8700 g, 5.0 mmol, 1.0 equiv), **DMTT** (1.7400 g, 5.0 mmol, 1.0 equiv),  $\text{K}_2\text{CO}_3$  (1.3800 g, 10.0 mmol, 2.0 equiv), and MeCN (50 mL) at room temperature for 12 h afford **12b** (0.8734 g, 91%, 99% D) as a white solid.

The corresponding non-deuterated product:

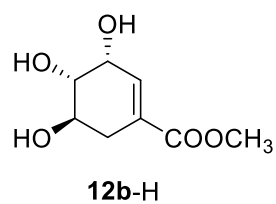

Methyl

(3*R*,4*S*,5*R*)-3,4,5-trihydroxycyclohex-1-ene-1-carboxylate

**12b-H** (CAS: 40983-58-2):  $^1\text{H}$  NMR (400 MHz,  $\text{DMSO-}d_6$ )  $\delta$  6.64 - 6.58 (m, 1 H), 4.94 - 4.81 (m, 2 H), 4.67 (s, 1 H), 4.21 (s, 1 H), 3.92 - 3.78 (m, 1 H), 3.66 (s, 3 H), 3.63 - 3.52 (m, 1 H), 2.48 - 2.36 (m, 1 H), 2.11 - 1.99 (m, 1 H).  $^{13}\text{C}$  NMR (101 MHz,  $\text{DMSO-}d_6$ )  $\delta$  166.8, 139.9, 127.4, 70.0, 66.9, 65.5, 51.7, 29.7.

Methyl- $d_3$

5-((3*aS*,4*S*,6*aR*)-2-oxohexahydro-1*H*-thieno[3,4-*d*]imidazol-4-yl)pentanoate (**13b**)

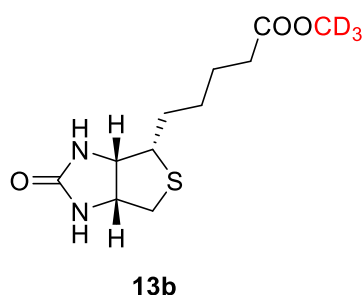

Following the general procedure A, the reaction of **13a** (48.9 mg, 0.2 mmol, 1.0 equiv), **DMTT** (70.2 mg, 0.2 mmol, 1.0 equiv),  $\text{K}_2\text{CO}_3$  (55.2 mg, 0.4 mmol, 2.0 equiv), and MeCN (2 mL) at room temperature for 12 h afford **13b** (33.8 mg, 65%, 99% D) as a white solid:  $^1\text{H}$  NMR (400 MHz,  $\text{CDCl}_3$ )  $\delta$  6.01 (s, 1 H), 5.81 (s, 1 H),

4.60 - 4.44 (m, 1 H), 4.41 - 4.28 (m, 1 H), 3.24 - 3.06 (m, 1 H), 2.89 (dd,  $J = 12.9, 4.9$  Hz, 1 H), 2.75 (d,  $J = 13.1$  Hz, 1 H), 2.32 (t,  $J = 7.4$  Hz, 2 H), 1.82 - 1.54 (m, 4 H), 1.52 - 1.33 (m, 2 H).  $^{13}\text{C}$  NMR (101 MHz,  $\text{CDCl}_3$ )  $\delta$  174.2, 164.2, 62.1, 60.3, 55.6, 40.5, 33.6, 28.4, 28.2, 24.7. ATR-FTIR ( $\text{cm}^{-1}$ ): 3440, 1676, 1515, 1465, 997, 750. HRMS ( $\text{ESI}^+$ ) Calcd for  $\text{C}_{11}\text{H}_{15}\text{D}_3\text{N}_2\text{O}_3\text{SNa}$  [ $\text{M}+\text{Na}$ ] $^+$ : 284.1119, found: 284.1120.

The corresponding non-deuterated product:

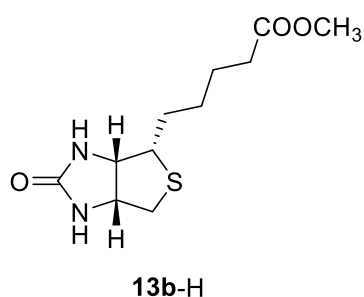

Methyl

5-((3*aS*,4*S*,6*aR*)-2-oxohexahydro-1*H*-thieno[3,4-*d*]imidazol-4-yl)pentanoate **13b-H** (CAS: 608-16-2):  $^1\text{H}$  NMR (400 MHz,  $\text{CDCl}_3$ )  $\delta$  5.99 (s, 1 H), 5.70 (s, 1 H), 4.62 - 4.42 (m, 1 H), 4.41 - 4.24 (m, 1 H), 3.65 (s, 3 H), 3.25 -

3.06 (m, 1 H), 2.89 (dd,  $J = 12.9, 4.9$  Hz, 1 H), 2.74 (d,  $J = 12.8$  Hz, 1 H), 2.32 (t,  $J = 7.5$  Hz, 2 H), 1.83 - 1.53 (m, 4 H), 1.54 - 1.33 (m, 2 H).  $^{13}\text{C}$  NMR (101 MHz,  $\text{CDCl}_3$ )  $\delta$  174.1, 164.0, 62.0, 60.2, 55.5, 51.5, 40.5, 33.6, 28.4, 28.2, 24.7.

Methyl- $d_3$  (tert-butoxycarbonyl)glycylglycinate (**14b**)

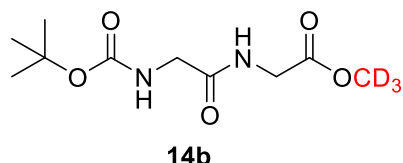

Following the general procedure A, the reaction of **14a** (46.5 mg, 0.2 mmol, 1.0 equiv), **DMTT** (70.2 mg, 0.2 mmol, 1.0 equiv),  $\text{K}_2\text{CO}_3$  (55.2 mg, 0.4 mmol, 2.0 equiv), and MeCN (2 mL) at room temperature for 12 h afford **14b** (41.2 mg, 83%, 99% D) as a colorless oil:  $^1\text{H}$  NMR (500 MHz,  $\text{CDCl}_3$ )  $\delta$  6.97 (t,  $J = 5.5$  Hz, 1 H), 5.45 (s, 1 H), 4.02 (d,  $J = 5.4$  Hz, 2 H), 3.83 (d,  $J = 5.9$  Hz, 2 H), 1.42 (s, 9 H).  $^{13}\text{C}$  NMR (126 MHz,  $\text{CDCl}_3$ )  $\delta$  170.2, 170.0, 156.1, 80.2, 44.0, 41.0, 28.2. ATR-FTIR ( $\text{cm}^{-1}$ ): 3326, 2979, 2935, 1749, 1663, 1522, 1368, 1171, 1032, 945, 743. HRMS (ESI $^+$ ) Calcd for  $\text{C}_{10}\text{H}_{15}\text{D}_3\text{N}_2\text{O}_5\text{Na}$   $[\text{M}+\text{Na}]^+$ : 272.1296, found: 272.1296.

The gram scale reaction of **14b**:

The reaction of **14a** (1.230 g, 5.3 mmol, 1.0 equiv), **DMTT** (1.844 g, 5.3 mmol, 1.0 equiv),  $\text{K}_2\text{CO}_3$  (1.463 g, 10.6 mmol, 2.0 equiv), and MeCN (53 mL) at room temperature for 12 h afford **14b** (1.2141 g, 92%, 99% D) as a white solid.

The corresponding non-deuterated product:

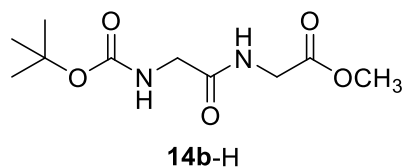

Methyl (tert-butoxycarbonyl)glycylglycinate **14b-H** (CAS: 53487-98-2):  $^1\text{H}$  NMR (400 MHz,  $\text{CDCl}_3$ )  $\delta$  6.95 (t,  $J = 6.9$  Hz, 1 H), 5.43 (s, 1 H), 4.03 (d,  $J = 5.3$  Hz, 2 H), 3.83 (d,  $J = 5.9$  Hz, 2 H), 3.72 (d,  $J = 1.1$  Hz, 3 H), 1.42 (d,  $J = 1.0$  Hz, 9 H).  $^{13}\text{C}$  NMR (101 MHz,  $\text{CDCl}_3$ )  $\delta$  170.2, 170.0, 156.1, 80.3, 52.3, 44.0, 41.0, 28.2.

**General Procedure B:**

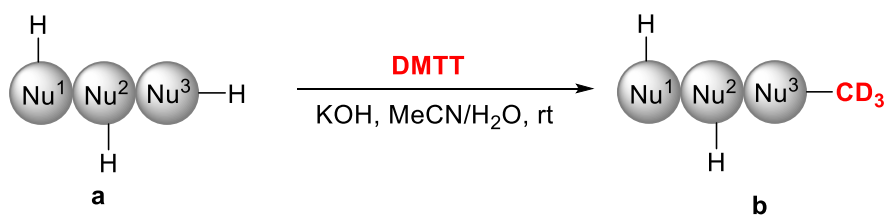

To a Schlenk tube was added carboxylic acid **a** (0.2 mmol, 1.0 equiv), **DMTT** (0.2 mmol, 2.0 equiv), KOH (22.4 mg, 0.4 mmol, 2.0 equiv), H<sub>2</sub>O (1 mL), and MeCN (1 mL). The reaction was stirring at room temperature for 12 h. The resulting mixture was concentrated in vacuo and the residue was purified by column chromatography to afford the corresponding product **b**.

#### Methyl-*d*<sub>3</sub> (((9*H*-fluoren-9-yl)methoxy)carbonyl)glycylglycylglycinate (**15b**)

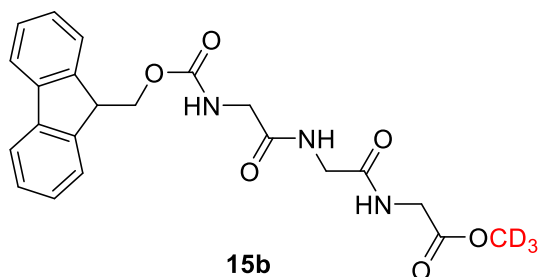

Following the general procedure B, the reaction of **15a** (82.2 mg, 0.2 mmol, 1.0 equiv), **DMTT** (70.2 mg, 0.2 mmol, 1.0 equiv), KOH (22.4 mg, 0.4 mmol, 2.0 equiv), H<sub>2</sub>O (1 mL), and MeCN (1 mL) at room temperature for 12 h afford **15b** (39.8 mg, 46%, 99% D) as a white solid: <sup>1</sup>H NMR (400 MHz, DMSO-*d*<sub>6</sub>) δ 8.30 (t, *J* = 5.9 Hz, 1 H), 8.17 (t, *J* = 5.9 Hz, 1 H), 7.89 (d, *J* = 7.5 Hz, 2 H), 7.73 (s, 1 H), 7.58 (t, *J* = 6.1 Hz, 1 H), 7.42 (t, *J* = 7.4 Hz, 2 H), 7.36 - 7.31 (m, 2 H), 4.29 (d, *J* = 7.5 Hz, 1 H), 4.25 - 4.20 (m, 1 H), 3.85 (d, *J* = 5.8 Hz, 2 H), 3.76 (d, *J* = 5.8 Hz, 2 H), 3.67 (d, *J* = 6.0 Hz, 2 H). <sup>13</sup>C NMR (101 MHz, DMSO-*d*<sub>6</sub>) δ 170.2, 169.5, 169.4, 156.5, 143.9, 140.7, 127.7, 127.1, 125.3, 120.1, 65.8, 46.7, 43.5, 41.7, 40.5. ATR-FTIR (cm<sup>-1</sup>): 3429, 1655, 1002, 825, 764, 627. EI-MS (*m/z*, relative intensity): 207 (93), 206 (90), 205 (59), 194 (28), 193 (45), 192 (45), 191 (40), 190 (25), 179 (22), 178 (70), 177 (100), 176 (60), 175 (30), 133 (20), 89 (22), 57 (28). HRMS (ESI<sup>+</sup>) Calcd for C<sub>22</sub>H<sub>20</sub>D<sub>3</sub>N<sub>3</sub>O<sub>6</sub>Na [M+Na]<sup>+</sup>: 451.1667, found: 451.1676.

The corresponding non-deuterated product:

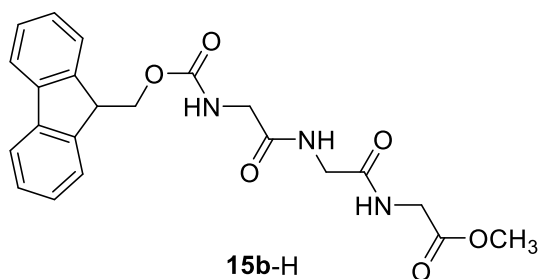

Methyl

(((9H-fluoren-9-yl)methoxy)carbonyl)glycylglycylglycinate **15b-H**<sup>6</sup>: <sup>1</sup>H NMR (400 MHz, DMSO-*d*<sub>6</sub>) δ 8.30 (t, *J* = 6.0 Hz, 1 H), 8.16 (t, *J* = 5.9 Hz, 1 H), 7.89 (d, *J* =

7.5 Hz, 2 H), 7.72 (d, *J* = 7.4 Hz, 1 H), 7.57 (t, *J* = 6.1 Hz, 1 H), 7.42 (td, *J* = 7.4, 1.1 Hz, 2 H), 7.33 (td, *J* = 7.4, 1.2 Hz, 2 H), 4.29 (d, *J* = 7.4 Hz, 1 H), 4.27 - 4.18 (m, 1 H), 3.85 (d, *J* = 5.9 Hz, 2 H), 3.75 (d, *J* = 5.8 Hz, 2 H), 3.66 (d, *J* = 6.0 Hz, 2 H), 3.62 (s, 3 H). <sup>13</sup>C NMR (101 MHz, DMSO-*d*<sub>6</sub>) δ 170.2, 169.5, 169.4, 156.5, 143.9, 140.7, 127.7, 127.1, 125.3, 120.1, 65.8, 51.7, 46.6, 43.5, 41.7, 40.5.

#### 2-(4-(Methoxy-*d*<sub>3</sub>)phenyl)ethan-1-ol (**16b**)

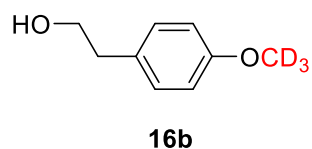

Following the general procedure A, the reaction of **16a** (27.6 mg, 0.2 mmol, 1.0 equiv), **DMTT** (70.2 mg, 0.2 mmol, 1.0 equiv), K<sub>2</sub>CO<sub>3</sub> (55.2 mg, 0.4 mmol, 2.0 equiv),

and MeCN (2 mL) at room temperature for 12 h afford **16b** (26.6 mg, 86%, 99% D) as a colorless oil: <sup>1</sup>H NMR (400 MHz, CDCl<sub>3</sub>) δ 7.14 (d, *J* = 8.5 Hz, 2 H), 6.86 (d, *J* = 8.5 Hz, 2 H), 3.90 - 3.64 (m, 2 H), 2.80 (t, *J* = 6.6 Hz, 2 H), 1.64 (bs, 1 H). <sup>13</sup>C NMR (101 MHz, CDCl<sub>3</sub>) δ 158.2, 130.4, 129.9, 114.0, 63.8, 38.2. ATR-FTIR (cm<sup>-1</sup>): 3401, 1711, 1615, 1516, 1448, 1370, 1219, 1088, 828. HRMS (ESI<sup>+</sup>) Calcd for C<sub>9</sub>H<sub>9</sub>D<sub>3</sub>O<sub>2</sub>Na [M+Na]<sup>+</sup>: 178.0918, found: 178.0916.

The corresponding non-deuterated product:

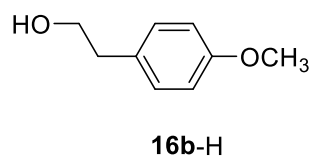

2-(4-Methoxyphenyl)ethan-1-ol **16b-H** (CAS: 702-23-8):

<sup>1</sup>H NMR (500 MHz, CDCl<sub>3</sub>) δ 7.15 (d, *J* = 8.6 Hz, 2 H), 6.86 (d, *J* = 8.6 Hz, 2 H), 3.85 - 3.80 (m, 2 H), 3.79 (s, 3 H), 2.81 (t, *J* = 6.5 Hz, 2 H), 1.43 (bs, 1 H). <sup>13</sup>C NMR (126 MHz, CDCl<sub>3</sub>) δ 158.2, 130.4, 130.0, 114.0, 63.8, 55.3, 38.2.

#### 6-(Methoxy-*d*<sub>3</sub>)-1H-indole (**17b**)

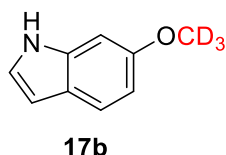

Following the general procedure A, the reaction of **17a** (26.6 mg, 0.2 mmol, 1.0 equiv), **DMTT** (70.2 mg, 0.2 mmol, 1.0 equiv),  $K_2CO_3$  (55.2 mg, 0.4 mmol, 2.0 equiv), and MeCN (2 mL) at room temperature for 12 h afford **17b** (27.6 mg, 92%, 99% D) as a colorless oil:  $^1H$  NMR (400 MHz,  $CDCl_3$ )  $\delta$  8.01 (s, 1 H), 7.54 (d,  $J = 8.5$  Hz, 1 H), 7.15 - 7.05 (m, 1 H), 6.89 - 6.80 (m, 2 H), 6.52 - 6.49 (m, 1 H).  $^{13}C$  NMR (101 MHz,  $CDCl_3$ )  $\delta$  156.3, 136.5, 123.0, 122.1, 121.2, 109.8, 102.4, 94.5. ATR-FTIR ( $cm^{-1}$ ): 3395, 2955, 2909, 2835, 1627, 1502, 1458, 1161, 1025, 811, 717. HRMS (ESI<sup>+</sup>) Calcd for  $C_9H_7D_3NO$   $[M+H]^+$ : 151.0945, found: 151.0945.

The corresponding non-deuterated product:

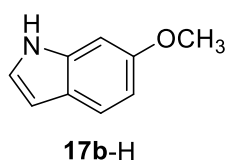

6-(Methoxy- $d_3$ )-1H-indole **17b-H** (CAS: 3189-13-7):  $^1H$  NMR (400 MHz,  $CDCl_3$ )  $\delta$  8.01 (s, 1 H), 7.55 (d,  $J = 8.5$  Hz, 1 H), 7.12 - 7.04 (m, 1 H), 6.92 - 6.79 (m, 2 H), 6.57 - 6.42 (m, 1 H), 3.86 (s, 3 H).  $^{13}C$  NMR (101 MHz,  $CDCl_3$ )  $\delta$  156.3, 136.5, 123.0, 122.1, 121.2, 109.8, 102.3, 94.5, 55.6.

#### 4-(Methoxy- $d_3$ )-*N*-phenylaniline (**18b**)

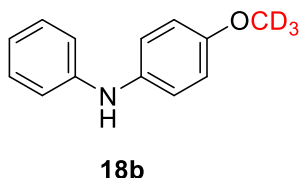

Following the general procedure A, the reaction of **18a** (37.0 mg, 0.2 mmol, 1.0 equiv), **DMTT** (70.2 mg, 0.2 mmol, 1.0 equiv),  $K_2CO_3$  (55.2 mg, 0.4 mmol, 2.0 equiv), and MeCN (2 mL) at room temperature for 12 h afford **18b** (24.2 mg, 60%, 99% D) as a white solid:  $^1H$  NMR (400 MHz,  $CDCl_3$ )  $\delta$  7.28 - 7.18 (m, 2 H), 7.14 - 7.04 (m, 2 H), 6.99 - 6.77 (m, 5 H), 5.50 (s, 1 H).  $^{13}C$  NMR (101 MHz,  $CDCl_3$ )  $\delta$  155.2, 145.1, 135.7, 129.3, 122.2, 119.5, 115.6, 114.6. ATR-FTIR ( $cm^{-1}$ ): 3395, 3057, 3032, 2962, 2928, 2834, 1598, 1515, 1247, 1031, 829, 744. HRMS (ESI<sup>+</sup>) Calcd for  $C_{13}H_{10}D_3NONa$   $[M+Na]^+$ : 225.1078, found: 225.1080.

The corresponding non-deuterated product:



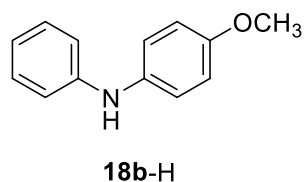

4-(Methoxy-*d*<sub>3</sub>)-*N*-phenylaniline **18b-H** (CAS: 1208-86-2):

<sup>1</sup>H NMR (400 MHz, CDCl<sub>3</sub>) δ 7.26 - 7.20 (m, 2 H), 7.12 - 7.07 (m, 2 H), 6.96 - 6.81 (m, 5 H), 5.51 (s, 1 H), 3.82 (s, 3 H). <sup>13</sup>C NMR (101 MHz, CDCl<sub>3</sub>) δ 155.2, 145.1, 135.7,

129.3, 122.2, 119.5, 115.6, 114.6, 55.5.

*N*-(4-(Methoxy-*d*<sub>3</sub>)phenyl)acetamide (**19b**)

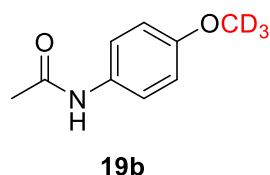

Following the general procedure A, the reaction of **19a** (30.2 mg, 0.2 mmol, 1.0 equiv), **DMTT** (70.2 mg, 0.2 mmol, 1.0 equiv), K<sub>2</sub>CO<sub>3</sub> (55.2 mg, 0.4 mmol, 2.0 equiv), and MeCN (2 mL) at room temperature for 12 h afford **19b** (32.9 mg, 98%,

99% D) as a colorless oil: <sup>1</sup>H NMR (400 MHz, CDCl<sub>3</sub>) δ 7.99 (s, 1 H), 7.37 (d, *J* = 9.0 Hz, 2 H), 6.80 (d, *J* = 8.9 Hz, 2 H), 2.09 (s, 3 H). <sup>13</sup>C NMR (101 MHz, CDCl<sub>3</sub>) δ 168.7, 156.3, 131.0, 122.0, 114.0, 24.1. ATR-FTIR (cm<sup>-1</sup>): 3244, 3070, 2961, 1651, 1603, 1515, 1318, 1113, 1029, 818, 773. HRMS (ESI<sup>+</sup>) Calcd for C<sub>9</sub>H<sub>8</sub>D<sub>3</sub>NO<sub>2</sub>Na [M+Na]<sup>+</sup>: 191.0871, found: 191.0868.

The corresponding non-deuterated product:

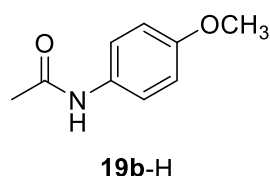

*N*-(4-(Methoxy-*d*<sub>3</sub>)phenyl)acetamide **19b-H** (CAS: 51-66-1):

<sup>1</sup>H NMR (400 MHz, CDCl<sub>3</sub>) δ 7.93 (s, 1 H), 7.37 (d, *J* = 9.0 Hz, 2 H), 6.81 (d, *J* = 9.0 Hz, 2 H), 3.75 (s, 3 H), 2.10 (s, 3 H).

<sup>13</sup>C NMR (101 MHz, CDCl<sub>3</sub>) δ 168.7, 156.3, 131.0, 122.0,

114.0, 55.4, 24.1.

(3*R*,4*S*)-1-(4-Fluorophenyl)-3-((*S*)-3-(4-fluorophenyl)-3-hydroxypropyl)-4-(4-(methoxy-*d*<sub>3</sub>)phenyl)azetididin-2-one (**20b**)

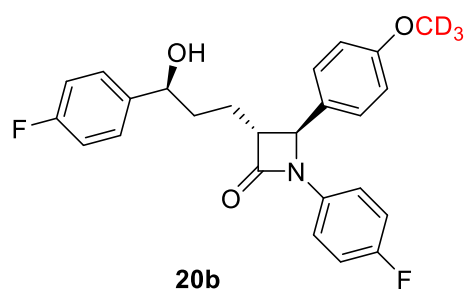

Following the general procedure A, the reaction of **20a** (81.9 mg, 0.2 mmol, 1.0 equiv), **DMTT** (70.2 mg, 0.2 mmol, 1.0 equiv), K<sub>2</sub>CO<sub>3</sub> (55.2 mg, 0.4 mmol, 2.0 equiv), and MeCN (2 mL) at

room temperature for 12 h afford **20b** (83.9 mg, 98%, 99% D) as a white solid:  $^1\text{H}$  NMR (400 MHz,  $\text{CDCl}_3$ )  $\delta$  7.38 - 7.20 (m, 6 H), 7.06 - 6.99 (m, 2 H), 6.98 - 6.87 (m, 4 H), 4.72 (t,  $J = 5.9$  Hz, 1 H), 4.61 (d,  $J = 2.3$  Hz, 1 H), 3.17 - 2.95 (m, 2 H), 2.06 - 1.85 (m, 4 H).  $^{13}\text{C}$  NMR (101 MHz,  $\text{CDCl}_3$ )  $\delta$  167.7, 162.0 (d,  $J = 245.3$  Hz), 159.7, 158.9 (d,  $J = 243.4$  Hz), 140.1 (d,  $J = 3.1$  Hz), 133.7 (d,  $J = 2.7$  Hz), 129.2, 127.3 (d,  $J = 8.0$  Hz), 127.1, 118.4, 118.3 (d,  $J = 7.7$  Hz), 115.7 (d,  $J = 22.7$  Hz), 115.2 (d,  $J = 21.3$  Hz), 114.5, 72.9, 61.0, 60.1, 36.5, 24.9.  $^{19}\text{F}$  NMR (376 MHz,  $\text{CDCl}_3$ )  $\delta$  -115.0, -118.0. ATR-FTIR ( $\text{cm}^{-1}$ ): 3650, 3623, 3504, 2917, 2847, 1741, 1511, 1251, 1223, 750. HRMS (ESI $^+$ ) Calcd for  $\text{C}_{25}\text{H}_{20}\text{D}_3\text{F}_2\text{NO}_3\text{Na}$   $[\text{M}+\text{Na}]^+$ : 449.1727, found: 449.1723.

The gram scale reaction of **20b**:

The reaction of **20a** (1.085 g, 2.65 mmol, 1.0 equiv), **DMTT** (0.922 g, 2.65 mmol, 1.0 equiv),  $\text{K}_2\text{CO}_3$  (0.731 g, 5.3 mmol, 2.0 equiv), and MeCN (2 mL) at room temperature for 12 h afford **20b** (1.0737 g, 95%, 99% D) as a white solid.

The corresponding non-deuterated product:

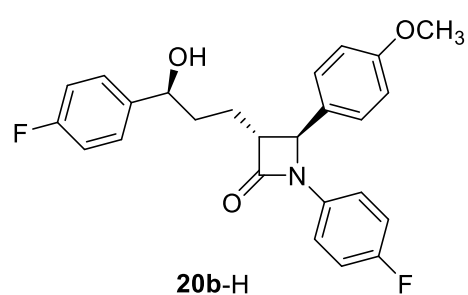

(3*R*,4*S*)-1-(4-Fluorophenyl)-3-((*S*)-3-(4-fluorophenyl)-3-hydroxypropyl)-4-(4-methoxyphenyl)azetidin-2-one **20b-H**:  $^1\text{H}$  NMR (400 MHz,  $\text{CDCl}_3$ )  $\delta$  7.36 - 7.20 (m, 6 H), 7.09 - 6.98 (m, 2 H), 6.99 - 6.86 (m, 4 H), 4.72 (t,  $J = 5.9$  Hz, 1 H), 4.61 (d,  $J = 2.4$  Hz, 1 H), 3.83 (s, 3 H), 3.14

- 3.05 (m, 1 H), 2.85 (s, 1 H), 2.07 - 1.84 (m, 4 H).  $^{13}\text{C}$  NMR (101 MHz,  $\text{CDCl}_3$ )  $\delta$  167.7, 162.0 (d,  $J = 245.5$  Hz), 159.7, 158.9 (d,  $J = 243.2$  Hz), 140.1 (d,  $J = 3.1$  Hz), 133.7 (d,  $J = 2.7$  Hz), 129.2, 127.3 (d,  $J = 7.9$  Hz), 127.1, 118.4, 118.3 (d,  $J = 7.8$  Hz), 115.7 (d,  $J = 22.7$  Hz), 115.2 (d,  $J = 21.3$  Hz), 114.6, 72.9, 61.0, 60.2, 55.2, 36.5, 24.9.  $^{19}\text{F}$  NMR (376 MHz,  $\text{CDCl}_3$ )  $\delta$  -115.0, -118.1.

(8*R*,9*S*,13*S*,14*S*,17*R*)-17-Ethynyl-3-(methoxy-*d*<sub>3</sub>)-13-methyl-7,8,9,11,12,13,14,15,16,17-decahydro-6*H*-cyclopenta[*a*]phenanthren-17-ol (**21b**)

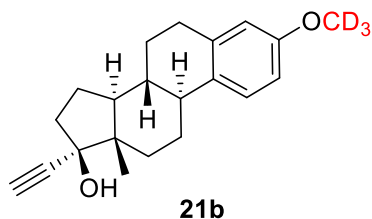

**21b**

Following the general procedure A, the reaction of **21a** (59.3 mg, 0.2 mmol, 1.0 equiv), **DMTT** (70.2 mg, 0.2 mmol, 1.0 equiv),  $K_2CO_3$  (55.2 mg, 0.4 mmol, 2.0 equiv), and MeCN (2 mL) at room temperature for 12 h afford **21b** (61.6 mg, 98%, 99% D) as a white solid:  $^1H$  NMR (400 MHz,  $CDCl_3$ )  $\delta$  7.23 (d,  $J = 8.6$  Hz, 1 H), 6.73 (dd,  $J = 8.6, 2.8$  Hz, 1 H), 6.65 (d,  $J = 2.7$  Hz, 1 H), 2.91 - 2.83 (m, 2 H), 2.62 (s, 1 H), 2.44 - 2.31 (m, 2 H), 2.28 - 2.20 (m, 1 H), 2.12 (s, 1 H), 2.10 - 2.00 (m, 1 H), 1.99 - 1.86 (m, 2 H), 1.84 - 1.67 (m, 3 H), 1.59 - 1.32 (m, 4 H), 0.90 (s, 3 H).  $^{13}C$  NMR (101 MHz,  $CDCl_3$ )  $\delta$  157.3, 137.9, 132.5, 126.3, 113.7, 111.4, 87.5, 79.8, 74.0, 49.4, 47.1, 43.5, 39.4, 38.9, 32.7, 29.8, 27.2, 26.3, 22.8, 12.7. ATR-FTIR ( $cm^{-1}$ ): 3284, 2904, 2868, 1611, 1501, 1448, 1287, 1251, 1139, 1060, 906, 735. HRMS (ESI<sup>+</sup>) Calcd for  $C_{21}H_{24}D_3O_2$   $[M+H]^+$ : 314.2194, found: 314.2193.

The gram scale reaction of **21b**:

The reaction of **21a** (1.097 g, 3.7 mmol, 1.0 equiv), **DMTT** (1.288 g, 3.7 mmol, 1.0 equiv),  $K_2CO_3$  (1.021 g, 7.4 mmol, 2.0 equiv), and MeCN (2 mL) at room temperature for 12 h afford **21b** (1.1133 g, 96%, 99% D) as a white solid.

The corresponding non-deuterated product:

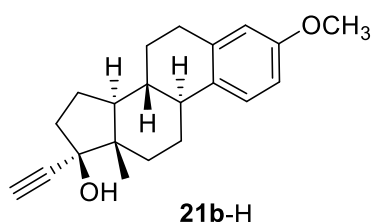

**21b-H**

(8*R*,9*S*,13*S*,14*S*,17*R*)-17-Ethynyl-3-methoxy-13-methyl-7,8,9,11,12,13,14,15,16,17-decahydro-6*H*-cyclopenta[*a*]phenanthren-17-ol **21b-H** (CAS: 72-33-3):  $^1H$  NMR (400 MHz,  $CDCl_3$ )  $\delta$  7.23 (d,  $J = 8.7$  Hz, 1 H), 6.73 (dd,  $J = 8.6, 2.8$  Hz, 1 H), 6.64 (d,  $J = 2.7$  Hz, 1 H), 3.79 (s, 3 H), 2.93 - 2.79 (m, 2 H), 2.62 (s, 1 H), 2.44 - 2.30 (m, 2 H), 2.28 - 2.17 (m, 1 H), 2.07 - 1.97 (m, 2 H), 1.98 - 1.86 (m, 2 H), 1.84 - 1.69 (m, 3 H), 1.60 - 1.30 (m, 4 H), 0.90 (s, 3 H).  $^{13}C$  NMR (101 MHz,  $CDCl_3$ )  $\delta$  157.4, 137.9, 132.5, 126.3, 113.8, 111.4, 87.5, 79.8, 74.0, 55.2, 49.4, 47.1, 43.5, 39.4, 38.9, 32.7, 29.8, 27.2, 26.4, 22.8, 12.7.

*(R)*-5-((*S*)-1,2-Dihydroxyethyl)-3,4-bis(methoxy-*d*<sub>3</sub>)furan-2(*5H*)-one (**22b**)

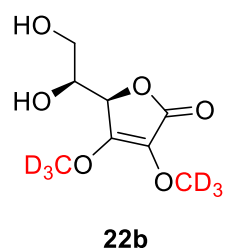

Following the general procedure A, the reaction of **22a** (35.2 mg, 0.2 mmol, 1.0 equiv), **DMTT** (140.4 mg, 0.4 mmol, 2.0 equiv),  $K_2CO_3$  (110.4 mg, 0.8 mmol, 4.0 equiv), and MeCN (2 mL) at room temperature for 12 h afford **22b** (38.4 mg, 91%, 99% D) as a colorless oil:  $^1H$  NMR (400 MHz,  $CDCl_3$ )  $\delta$  4.67 (d,  $J = 2.9$  Hz, 1 H), 3.97 - 3.88 (m, 1 H), 3.88 - 3.75 (m, 2 H).  $^{13}C$  NMR (101 MHz,  $CDCl_3$ )  $\delta$  75.8, 69.9, 63.3. ATR-FTIR ( $cm^{-1}$ ): 3743, 3476, 3417, 1752, 1677, 1515, 1068, 746. HRMS (ESI<sup>+</sup>) Calcd for  $C_8H_6D_6O_6Na$  [ $M+Na$ ]<sup>+</sup>: 233.0903, found: 233.0903.

The corresponding non-deuterated product:

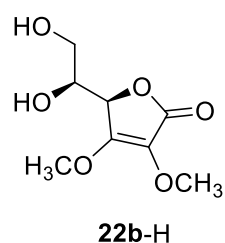

*(R)*-5-((*S*)-1,2-Dihydroxyethyl)-3,4-bis(methoxy)furan-2(*5H*)-one **22b-H**<sup>9</sup>:  $^1H$  NMR (400 MHz,  $CDCl_3$ )  $\delta$  4.67 (d,  $J = 2.7$  Hz, 1 H), 4.16 (s, 3 H), 3.97 - 3.89 (m, 1 H), 3.88 - 3.72 (m, 2 H), 3.83 (s, 3 H), 3.03 (s, 1 H), 2.67 (s, 1 H).  $^{13}C$  NMR (101 MHz,  $CDCl_3$ )  $\delta$  169.6, 157.8, 122.9, 75.8, 69.9, 63.3, 60.5, 59.5.

(5-(Methoxy-*d*<sub>3</sub>)-6-methylpyridine-3,4-diyl)dimethanol (**23b**)

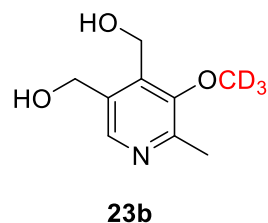

Following the general procedure A, the reaction of **23a** (33.8 mg, 0.2 mmol, 1.0 equiv), **DMTT** (70.2 mg, 0.2 mmol, 1.0 equiv),  $K_2CO_3$  (55.2 mg, 0.4 mmol, 2.0 equiv), and MeCN (2 mL) at room temperature for 12 h afford **23b** (30.8 mg, 83%, 99% D) as a colorless oil:  $^1H$  NMR (400 MHz,  $DMSO-d_6$ )  $\delta$  7.38 (s, 1 H), 4.58 (s, 2 H), 4.40 (s, 2 H), 3.16 (s, 2 H), 2.36 (s, 3 H).  $^{13}C$  NMR (101 MHz,  $DMSO-d_6$ )  $\delta$  166.1, 142.2, 137.0, 134.8, 121.6, 58.7, 58.1, 12.0. ATR-FTIR ( $cm^{-1}$ ): 3425, 1653, 1026, 825, 764, 629. HRMS (ESI<sup>+</sup>) Calcd for  $C_9H_{11}D_3NO_3$  [ $M+H$ ]<sup>+</sup>: 187.1156, found: 187.1158.

The corresponding non-deuterated product:

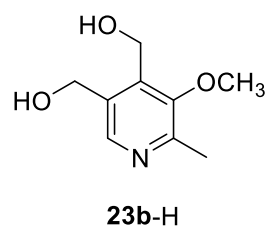

(5-Methoxy-6-methylpyridine-3,4-diyl)dimethanol **23b-H**<sup>10</sup>:

$^1H$  NMR (400 MHz,  $DMSO-d_6$ )  $\delta$  7.37 (s, 1 H), 4.59 (s, 2 H),

4.40 (s, 2 H), 3.97 (s, 3 H), 2.37 (s, 3 H).  $^{13}\text{C}$  NMR (101 MHz,  $\text{DMSO-}d_6$ )  $\delta$  166.2, 142.0, 136.8, 134.6, 121.3, 58.9, 58.0, 45.0, 11.9.

#### 2-((Methyl- $d_3$ )thio)aniline (**24b**)

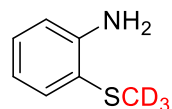

Following the general procedure A, the reaction of 2-aminobenzenethiol **24a** (25.0 mg, 0.2 mmol, 1.0 equiv), **DMTT** (**24b**) (70.2 mg, 0.2 mmol, 1.0 equiv),  $\text{K}_2\text{CO}_3$  (55.2 mg, 0.4 mmol, 2.0 equiv), and MeCN (2 mL) at room temperature for 12 h afford **24b** (19.3 mg, 68%, 99% D) as a colorless oil:  $^1\text{H}$  NMR (400 MHz,  $\text{CDCl}_3$ )  $\delta$  7.36 (dd,  $J = 7.9, 1.5$  Hz, 1 H), 7.10 (td,  $J = 7.7, 1.5$  Hz, 1 H), 6.80 - 6.65 (m, 2 H), 4.27 (bs, 2 H).  $^{13}\text{C}$  NMR (101 MHz,  $\text{CDCl}_3$ )  $\delta$  147.0, 133.4, 128.8, 120.1, 118.7, 114.8. ATR-FTIR ( $\text{cm}^{-1}$ ): 3421, 3346, 3057, 3016, 1653, 1607, 1465, 1437, 1300, 914, 744. HRMS (ESI $^+$ ) Calcd for  $\text{C}_7\text{H}_7\text{D}_3\text{NS}$   $[\text{M}+\text{H}]^+$ : 143.0717, found: 143.0715.

The corresponding non-deuterated product:

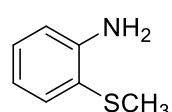

2-(Methylthio)aniline **24b-H** (CAS: 2987-53-3):  $^1\text{H}$  NMR (400 MHz,  $\text{CDCl}_3$ )  $\delta$  7.36 (dd,  $J = 7.9, 1.5$  Hz, 1 H), 7.15 - 7.04 (m, 1 H), 6.77 - 6.67 (m, 2 H), 4.27 (s, 2 H), 2.36 (s, 3 H).  $^{13}\text{C}$  NMR (101 MHz,  $\text{CDCl}_3$ )  $\delta$  147.0, 133.4, 128.9, 120.2, 118.7, 114.8, 17.7.

#### DL-1,4-bis((methyl- $d_3$ )thio)butane-2,3-diol (**25b**)

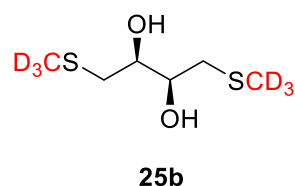

Following the general procedure A, the reaction of DL-1,4-dithiothreitol **25a** (30.8 mg, 0.2 mmol, 1.0 equiv), **DMTT** (140.4 mg, 0.4 mmol, 2.0 equiv),  $\text{K}_2\text{CO}_3$  (110.4 mg, 0.8 mmol, 4.0 equiv), and MeCN (2 mL) at room temperature for 12 h afford **25b** (28.8, 76%, 99% D) as a white solid:  $^1\text{H}$  NMR (400 MHz,  $\text{CDCl}_3$ )  $\delta$  3.77 - 3.69 (m, 2 H), 2.83 - 2.78 (m, 2 H), 2.77 - 2.64 (m, 4 H).  $^{13}\text{C}$  NMR (101 MHz,  $\text{CDCl}_3$ )  $\delta$  70.0, 38.1. ATR-FTIR ( $\text{cm}^{-1}$ ): 3235, 2915, 1695, 1429, 1320, 1034, 967, 876, 706. HRMS (ESI $^+$ ) Calcd for  $\text{C}_6\text{H}_8\text{D}_6\text{O}_2\text{S}_2\text{Na}$   $[\text{M}+\text{Na}]^+$ : 211.0704, found: 211.0702.

The corresponding non-deuterated product:

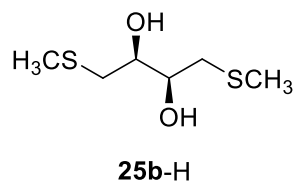

DL-1,4-bis((methylthio)butane-2,3-diol) **25b-H**:  $^1\text{H}$  NMR (400 MHz,  $\text{CDCl}_3$ )  $\delta$  3.79 - 3.68 (m, 2 H), 2.91 - 2.77 (m, 2 H), 2.76 - 2.67 (m, 4 H), 2.13 (s, 6 H).  $^{13}\text{C}$  NMR (101 MHz,  $\text{CDCl}_3$ )  $\delta$  70.0, 38.2, 15.6.

4-Amino-*N*-(methyl- $d_3$ )-*N*-(5-methylisoxazol-3-yl)benzenesulfonamide (**26b**)

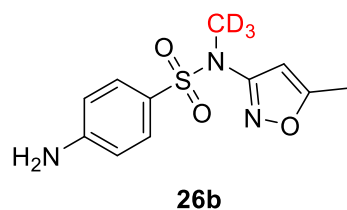

Following the general procedure A, the reaction of sulfamethoxazole **26a** (50.7 mg, 0.2 mmol, 1.0 equiv), **DMTT** (70.2 mg, 0.2 mmol, 1.0 equiv),  $\text{K}_2\text{CO}_3$  (55.2 mg, 0.4 mmol, 2.0 equiv), and MeCN (2 mL) at room temperature for 12 h afford **26b** (51.2 mg, 95%, 99% D) as a white solid:  $^1\text{H}$  NMR (400 MHz,  $\text{CDCl}_3$ )  $\delta$  7.49 - 7.40 (m, 2 H), 6.61 - 6.56 (m, 2 H), 6.45 (d,  $J = 0.9$  Hz, 1 H), 4.28 (s, 2 H), 2.34 (s, 3 H).  $^{13}\text{C}$  NMR (101 MHz,  $\text{CDCl}_3$ )  $\delta$  170.1, 160.9, 151.4, 129.2, 124.2, 113.9, 97.5, 12.6. ATR-FTIR ( $\text{cm}^{-1}$ ): 3480, 3385, 3236, 2936, 1597, 1446, 1350, 1162, 1003, 917, 834, 692. HRMS (ESI $^+$ ) Calcd for  $\text{C}_{11}\text{H}_{10}\text{D}_3\text{N}_3\text{O}_3\text{S}$  [ $\text{M}$ ] $^+$ : 270.0866, found: 270.0867.

The corresponding non-deuterated product:

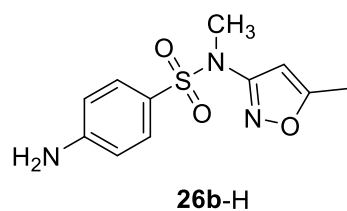

4-Amino-*N*-methyl-*N*-(5-methylisoxazol-3-yl)benzenesulfonamide **26b-H** $^{12}$ :  $^1\text{H}$  NMR (400 MHz,  $\text{CDCl}_3$ )  $\delta$  7.53 - 7.39 (m, 2 H), 6.65 - 6.54 (m, 2 H), 6.46 (d,  $J = 0.9$  Hz, 1 H), 4.27 (s, 2 H), 3.20 (s, 3 H), 2.35 (d,  $J = 0.9$  Hz, 3 H).  $^{13}\text{C}$  NMR (101 MHz,  $\text{CDCl}_3$ )  $\delta$  170.1, 161.0, 151.4, 129.3, 124.3, 113.9, 97.5, 34.8, 12.6.

4-Amino-*N*-(4,6-dimethylpyrimidin-2-yl)-*N*-(methyl- $d_3$ )benzenesulfonamide (**27b**)

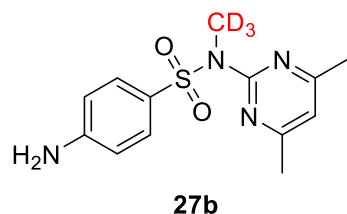

Following the general procedure A, the reaction of sulfamethazine **27a** (55.7 mg, 0.2 mmol, 1.0 equiv),

**DMTT** (70.2 mg, 0.2 mmol, 1.0 equiv),  $K_2CO_3$  (55.2 mg, 0.4 mmol, 2.0 equiv), and MeCN (2 mL) at room temperature for 12 h afford **27b** (36.6 mg, 62%, 99% D) as a white solid:  $^1H$  NMR (400 MHz,  $CDCl_3$ )  $\delta$  7.55 (d,  $J = 8.8$  Hz, 2 H), 7.32 (s, 1 H), 6.62 (d,  $J = 8.7$  Hz, 2 H), 4.17 (s, 2 H), 2.53 (s, 3 H), 2.43 (s, 3 H).  $^{13}C$  NMR (101 MHz,  $CDCl_3$ )  $\delta$  166.8, 159.7, 151.2, 129.5, 126.3, 113.9, 107.3, 25.8, 24.3. ATR-FTIR ( $cm^{-1}$ ): 3474, 3383, 3213, 1581, 1359, 1152, 930, 681. HRMS (ESI<sup>+</sup>) Calcd for  $C_{13}H_{13}D_3N_4O_2SNa$  [ $M+Na$ ]<sup>+</sup>: 318.1074, found: 318.1079.

The corresponding non-deuterated product:

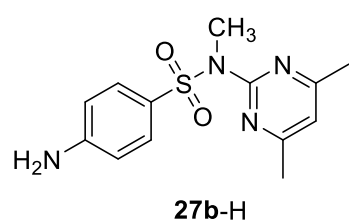

4-Amino-*N*-(4,6-dimethylpyrimidin-2-yl)-*N*-methylbenzenesulfonamide **27b-H**<sup>12b</sup>:  $^1H$  NMR (400 MHz,  $CDCl_3$ )  $\delta$  7.53 (d,  $J = 8.7$  Hz, 2 H), 7.31 (s, 1 H), 6.61 (d,  $J = 8.7$  Hz, 2 H), 4.21 (s, 2 H), 3.38 (s, 3 H), 2.52 (s, 3 H), 2.42 (s, 3 H).  $^{13}C$  NMR (101 MHz,  $CDCl_3$ )  $\delta$  166.8, 159.6, 151.1, 129.5, 126.1, 113.8, 107.3, 34.0, 25.8, 24.3.

5-Chloro-*N*-(4-(*N*-(cyclohexylcarbamoyl)-*N*-(methyl-*d*<sub>3</sub>)sulfamoyl)phenethyl)-2-methoxybenzamide (**28b**)

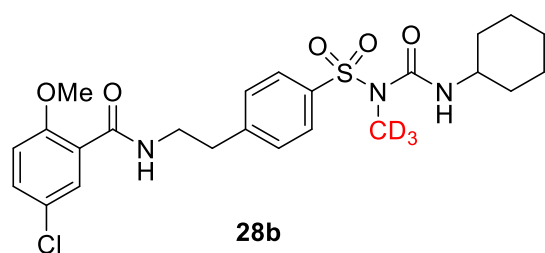

Following the general procedure A, the reaction of glibenclamide **28a** (98.8 mg, 0.2 mmol, 1.0 equiv), **DMTT** (70.2 mg, 0.2 mmol, 1.0 equiv),  $K_2CO_3$  (55.2 mg, 0.4 mmol, 2.0 equiv), and MeCN (2 mL) at room temperature for 12 h afford **28b** (62.2 mg, 61%, 99% D) as a white solid:  $^1H$  NMR (400 MHz,  $CDCl_3$ )  $\delta$  8.14 (d,  $J = 2.8$  Hz, 1 H), 7.81 (t,  $J = 5.8$  Hz, 1 H), 7.75 (d,  $J = 8.3$  Hz, 2 H), 7.41 (d,  $J = 8.3$  Hz, 2 H), 7.36 (dd,  $J = 8.8, 2.8$  Hz, 1 H), 7.19 (d,  $J = 7.8$  Hz, 1 H), 6.86 (d,  $J = 8.8$  Hz, 1 H), 3.77 (s, 3 H), 3.72 (q,  $J = 6.7$  Hz, 2 H), 3.66 - 3.54 (m, 1 H), 3.01 (t,  $J = 6.9$  Hz, 2 H), 1.91 - 1.81 (m, 3 H), 1.74 - 1.64 (m, 2 H), 1.63 - 1.53 (m, 1 H), 1.37 - 1.25 (m, 2 H), 1.25 - 1.18 (m, 2 H).  $^{13}C$  NMR (101 MHz,  $CDCl_3$ )  $\delta$  164.0, 155.8, 151.8, 146.0, 136.1, 132.4, 131.8, 129.8, 127.1, 126.7, 122.5,

112.8, 56.2, 49.8, 40.5, 35.5, 32.9, 25.4, 24.5. ATR-FTIR (cm<sup>-1</sup>): 3394, 2934, 2855, 1700, 1655, 1527, 1352, 1270, 1158, 93, 745. HRMS (ESI<sup>+</sup>) Calcd for C<sub>24</sub>H<sub>27</sub>D<sub>3</sub>ClN<sub>3</sub>O<sub>5</sub>S [M]<sup>+</sup>: 510.1783, found: 510.1788.

The corresponding non-deuterated product:

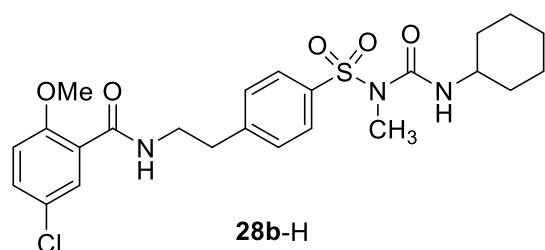

5-Chloro-*N*-(4-(*N*-(cyclohexylcarbamoyl)-*N*-(methylsulfamoyl)phenethyl)-2-methoxybenzamide **28b-H**: <sup>1</sup>H NMR (400 MHz, CDCl<sub>3</sub>) δ 8.13 (d, *J* = 2.7 Hz, 1 H), 7.81 (t, *J* = 5.5 Hz, 1 H), 7.75 (d, *J* = 8.3 Hz, 2

H), 7.41 (d, *J* = 8.3 Hz, 2 H), 7.35 (dd, *J* = 8.8, 2.8 Hz, 1 H), 7.19 (d, *J* = 7.8 Hz, 1 H), 6.86 (d, *J* = 8.9 Hz, 1 H), 3.77 (s, 3 H), 3.72 (q, *J* = 6.7 Hz, 2 H), 3.67 - 3.53 (m, 1 H), 3.10 (s, 3 H), 3.00 (t, *J* = 7.0 Hz, 2 H), 1.94 - 1.79 (m, 3 H), 1.76 - 1.63 (m, 2 H), 1.63 - 1.51 (m, 1 H), 1.37 - 1.25 (m, 2 H), 1.25 - 1.15 (m, 2 H). <sup>13</sup>C NMR (101 MHz, CDCl<sub>3</sub>) δ 164.0, 155.8, 151.8, 146.0, 136.0, 132.4, 131.8, 129.8, 127.1, 126.7, 122.5, 112.8, 56.2, 49.8, 40.4, 35.4, 32.9, 32.4, 25.3, 24.5.

1-((2*R*,3*S*,4*S*,5*R*)-3,4-dihydroxy-5-(hydroxymethyl)tetrahydrofuran-2-yl)-3-(methyl-*d*<sub>3</sub>)pyrimidine-2,4(1*H*,3*H*)-dione (**29b**)

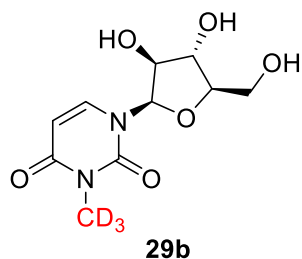

Following the general procedure A, the reaction of spongouridine **29a** (48.8 mg, 0.2 mmol, 1.0 equiv), **DMTT** (70.2 mg, 0.2 mmol, 1.0 equiv), K<sub>2</sub>CO<sub>3</sub> (55.2 mg, 0.4 mmol, 2.0 equiv), and MeCN (2 mL) at room temperature for 12 h afford **29b** (47.3 mg, 91%, 99% D) as a white solid: <sup>1</sup>H

NMR (400 MHz, CD<sub>3</sub>OD) δ 7.85 (d, *J* = 8.1 Hz, 1 H), 6.14 (d, *J* = 4.1 Hz, 1 H), 5.74 (d, *J* = 8.1 Hz, 1 H), 4.24 - 4.13 (m, 1 H), 4.10 - 4.05 (m, 1 H), 3.99 - 3.91 (m, 1 H), 3.87 - 3.74 (m, 2 H). <sup>13</sup>C NMR (101 MHz, CD<sub>3</sub>OD) δ 165.6, 152.6, 142.2, 100.4, 88.7, 86.7, 77.8, 77.1, 62.7. ATR-FTIR (cm<sup>-1</sup>): 2931, 2496, 2240, 2223, 2073, 1660, 1471, 1121, 989, 808. EI-MS (*m/z*, relative intensity): 131 (25), 130 (61), 129 (55), 128 (36),



127 (30), 71 (44), 70 (100), 69 (69). HRMS (ESI<sup>+</sup>) Calcd for C<sub>10</sub>H<sub>11</sub>D<sub>3</sub>N<sub>2</sub>O<sub>6</sub>Na [M+Na]<sup>+</sup>: 284.0932, found: 284.0935.

The corresponding non-deuterated product:

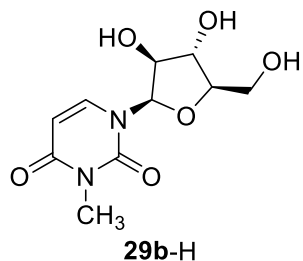

1-((2*R*,3*S*,4*S*,5*R*)-3,4-dihydroxy-5-(hydroxymethyl)tetrahydrofuran-2-yl)-3-(methyl)pyrimidine-2,4(1*H*,3*H*)-dione

**29b-H**<sup>13</sup>: <sup>1</sup>H NMR (400 MHz, CD<sub>3</sub>OD) δ 7.85 (d, *J* = 8.1 Hz, 1 H), 6.14 (d, *J* = 4.1 Hz, 1 H), 5.74 (d, *J* = 8.1 Hz, 1 H), 4.21 - 4.14 (m, 1 H), 4.07 (t, *J* = 3.1 Hz, 1 H), 3.98 - 3.89 (m, 1 H), 3.86 - 3.73 (m, 2 H), 3.29 (s, 3 H). <sup>13</sup>C NMR (101 MHz, CD<sub>3</sub>OD) δ 165.6, 152.6, 142.2, 100.4, 88.7, 86.8, 77.8, 77.1, 62.7, 28.0.

## Section S5. The application in synthesis of deuterated pharmaceuticals

Synthesis of *d*<sub>3</sub>-bifendatum:

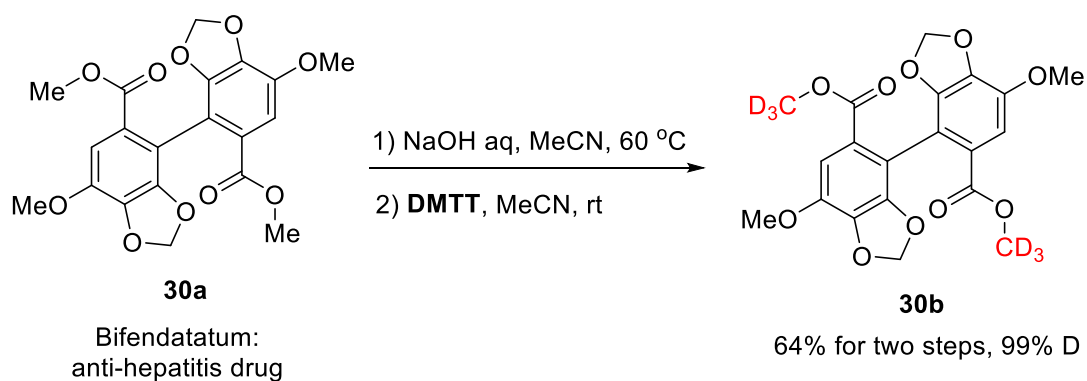

To a 10 mL round flask was added ester **30a** (83.6 mg, 0.2 mmol, 1.0 equiv), NaOH aq. (1 M, 0.8 mmol, 4.0 equiv), and MeCN (2 mL). The mixture was stirring at 60 °C until the starting material was disappeared completely. **DMTT** (140.4 mg, 0.4 mmol, 2.0 equiv) was added and the reaction was stirring at room temperature for 12 h. The resulting mixture was concentrated in vacuo and the residue was purified by

column chromatography to afford the corresponding product **30b** (54.0 mg, 64%, 99% D) as a white solid.

Bis(methyl- $d_3$ ) 7,7'-dimethoxy-[4,4'-bibenzo[*d*][1,3]dioxole]-5,5'-dicarboxylate (**30b**)

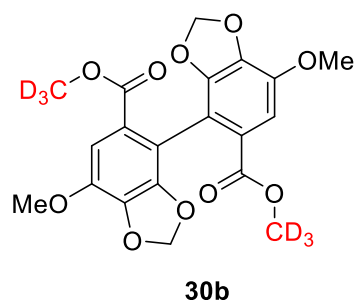

$^1\text{H}$  NMR (400 MHz,  $\text{CD}_3\text{OD}$ )  $\delta$  7.38 (s, 2 H), 5.99 (s, 4 H), 3.96 (s, 6 H).  $^{13}\text{C}$  NMR (101 MHz,  $\text{CD}_3\text{OD}$ )  $\delta$  166.3, 147.1, 142.4, 138.1, 123.4, 112.2, 110.9, 102.3, 56.5. ATR-FTIR ( $\text{cm}^{-1}$ ): 2951, 2902, 2844, 1723, 1638, 1592, 1432, 1531, 1319, 1173, 1044, 912, 742. HRMS (ESI $^+$ ) Calcd for  $\text{C}_{20}\text{H}_{12}\text{D}_6\text{O}_{10}\text{Na}$   $[\text{M}+\text{Na}]^+$ : 447.1169, found:

447.1165.

The corresponding non-deuterated product:

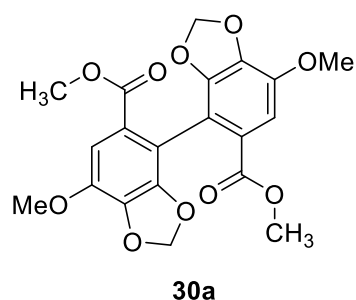

Bismethyl 7,7'-dimethoxy-[4,4'-bibenzo[*d*][1,3]dioxole]-5,5'-dicarboxylate **30a** (CAS: 73536-69-3):  $^1\text{H}$  NMR (400 MHz,  $\text{CD}_3\text{OD}$ )  $\delta$  7.37 (s, 2 H), 5.98 (s, 4 H), 3.95 (s, 6 H), 3.66 (s, 6 H).  $^{13}\text{C}$  NMR (101 MHz,  $\text{CD}_3\text{OD}$ )  $\delta$  166.3, 147.0, 142.3, 138.0, 123.2, 112.1, 110.7, 102.3, 56.4,

51.8.

Synthesis of  $d_3$ -methoxsalen:

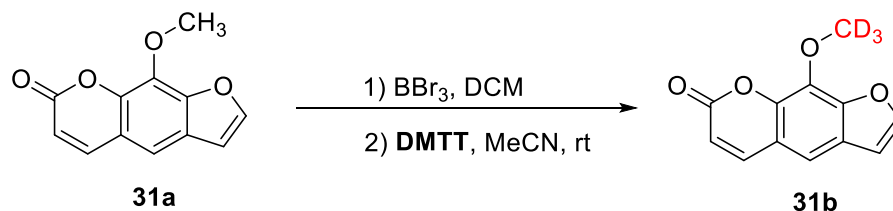

To a 25 mL dried Schlenk tube was added **31a** (43.2 mg, 0.2 mmol, 1.0 equiv) and anhydrous  $\text{CH}_2\text{Cl}_2$  (2 mL). Then  $\text{BBr}_3$  in DCM (0.8 mL, 0.8 mmol, 1 M, 4.0

equiv) was dropwise at 0 °C slowly under nitrogen atmosphere. The mixture was warmed to room temperature naturally and stirring for 6 h. After that, 2 mL H<sub>2</sub>O was added to quench the reaction. The two liquid layers were separated, and the aqueous layer was extracted with DCM. The combined organic layers were washed with brine and dried with MgSO<sub>4</sub>. After filtration and evaporation, the residue was purified by column chromatography to give the corresponding phenol derivatives.

To a Schlenk tube was added the corresponding phenol derivatives, **DMTT** (70.2 mg, 0.2 mmol, 1.0 equiv), K<sub>2</sub>CO<sub>3</sub> (55.2 mg, 0.4 mmol, 2.0 equiv), and MeCN (2 mL). The mixture was stirring at room temperature for 12 h. The resulting mixture was concentrated in vacuo and the residue was purified by column chromatography to afford the corresponding product **31b** (36.1 mg, 82%, 99% D) as a white solid.

9-(Methoxy-*d*<sub>3</sub>)-7*H*-furo[3,2-*g*]chromen-7-one (**31b**)

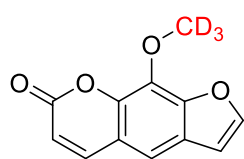

**31b**

<sup>1</sup>H NMR (400 MHz, CDCl<sub>3</sub>) δ 7.73 (d, *J* = 9.6 Hz, 1 H), 7.65 (d, *J* = 2.2 Hz, 1 H), 7.30 (s, 1 H), 6.78 (d, *J* = 2.2 Hz, 1 H), 6.31 (d, *J* = 9.6 Hz, 1 H). <sup>13</sup>C NMR (101 MHz, CDCl<sub>3</sub>) δ 160.4, 147.4, 146.5, 144.3, 142.7, 132.5, 126.0, 116.3, 114.4, 112.8, 106.6.

ATR-FTIR (cm<sup>-1</sup>): 3140, 3114, 3067, 1712, 1585, 1442, 1038, 1159, 1107, 872.

HRMS (ESI<sup>+</sup>) Calcd for C<sub>12</sub>H<sub>5</sub>D<sub>3</sub>O<sub>4</sub>Na [M+Na]<sup>+</sup>: 242.0503, found: 242.0507.

The corresponding non-deuterated product:

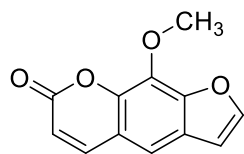

**31a**

9-Methoxy-7*H*-furo[3,2-*g*]chromen-7-one **31a** (CAS: 298-81-7):  
<sup>1</sup>H NMR (400 MHz, CDCl<sub>3</sub>) δ 7.74 (d, *J* = 9.6 Hz, 1 H), 7.66 (d, *J* = 2.2 Hz, 1 H), 7.32 (s, 1 H), 6.79 (d, *J* = 2.2 Hz, 1 H), 6.33 (d, *J* = 9.6 Hz, 1 H), 4.25 (s, 3 H). <sup>13</sup>C NMR (101 MHz, CDCl<sub>3</sub>) δ

160.4, 147.5, 146.5, 144.3, 142.8, 132.6, 126.0, 116.3, 114.5, 112.9, 106.6, 61.2.

## Section S6. The Synthesis of *N,N*-dimethylamines **33**

### General Procedure C:

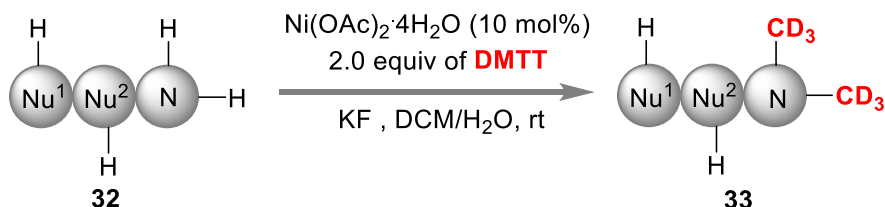

To a Schlenk tube was added amines **32** (0.2 mmol, 1.0 equiv), **DMTT** (0.4 mmol, 2.0 equiv),  $\text{Ni(OAc)}_2 \cdot 4\text{H}_2\text{O}$  (5.0 mg, 0.02 mmol, 0.1 equiv),  $\text{KF}$  (23.2 mg, 0.4 mmol, 2.0 equiv), and  $\text{DCM/H}_2\text{O}$  (2 mL, v:v = 20/1). The mixture was stirring at room temperature for 12 hours. Then the resulting mixture was concentrated in vacuo and the residue was purified by column chromatography to afford the corresponding product **33**.

### *N,N*-bis(methyl-*d*<sub>3</sub>)pyren-1-amine (**33a**)

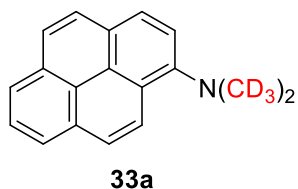

Following the general procedure C, the reaction of pyren-1-amine **32a** (43.5 mg, 0.2 mmol, 1.0 equiv), **DMTT** (140.4 mg, 0.4 mmol, 2.0 equiv),  $\text{Ni(OAc)}_2 \cdot 4\text{H}_2\text{O}$  (5.0 mg, 0.02 mmol, 0.1 equiv),  $\text{KF}$  (23.2 mg, 0.4 mmol, 2.0 equiv), and  $\text{DCM/H}_2\text{O}$  (2 mL, v:v = 20/1) at room temperature for 12 h afford **33a** (42.7 mg, 85%, 99% D) as a yellow solid:  $^1\text{H}$  NMR (400 MHz,  $\text{CDCl}_3$ )  $\delta$  8.50 (d,  $J$  = 9.2 Hz, 1 H), 8.19 - 8.07 (m, 4 H), 8.04 - 7.92 (m, 3 H), 7.75 (d,  $J$  = 8.2 Hz, 1 H).  $^{13}\text{C}$  NMR (101 MHz,  $\text{CDCl}_3$ )  $\delta$  148.9, 131.6, 131.3, 127.3, 126.9, 126.3, 125.97, 125.87, 125.4, 125.2, 124.3, 124.3, 123.4, 116.3. ATR-FTIR ( $\text{cm}^{-1}$ ): 3038, 1598, 1487, 1433, 1278, 1179, 913, 839, 747. HRMS ( $\text{ESI}^+$ ) Calcd for  $\text{C}_{18}\text{H}_{10}\text{D}_6\text{N}$   $[\text{M}+\text{H}]^+$ : 252.1654, found: 252.1653.

The corresponding non-deuterated product:

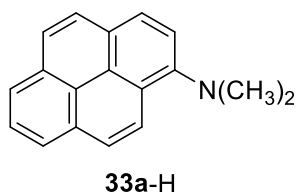

*N,N*-dimethylpyren-1-amine **33a-H**:  $^1\text{H}$  NMR (400 MHz,  $\text{CDCl}_3$ )  $\delta$  8.50 (d,  $J = 9.2$  Hz, 1 H), 8.20 - 8.06 (m, 4 H), 8.04 - 7.90 (m, 3 H), 7.76 (d,  $J = 8.2$  Hz, 1 H), 3.08 (s, 6 H).  $^{13}\text{C}$  NMR (101 MHz,  $\text{CDCl}_3$ )  $\delta$  148.9, 131.6, 131.3, 127.3, 127.0, 126.3, 125.97, 125.88, 125.5, 125.2, 124.3, 124.3, 123.4, 116.4, 45.6.

*N,N*-bis(methyl- $d_3$ )-4-nitronaphthalen-1-amine (**33b**)

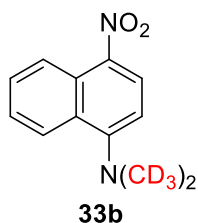

Following the general procedure C, the reaction of 4-nitronaphthalen-1-amine **32b** (37.6 mg, 0.2 mmol, 1.0 equiv), **DMTT** (140.4 mg, 0.4 mmol, 2.0 equiv),  $\text{Ni}(\text{OAc})_2 \cdot 4\text{H}_2\text{O}$  (5.0 mg, 0.02 mmol, 0.1 equiv),  $\text{KF}$  (23.2 mg, 0.4 mmol, 2.0 equiv), and  $\text{DCM}/\text{H}_2\text{O}$  (2 mL, v:v = 20/1) at room temperature for 12 h afford **33b** (30.2 mg, 68%, 99% D) as a yellow solid:  $^1\text{H}$  NMR (400 MHz,  $\text{CDCl}_3$ )  $\delta$  8.78 (d,  $J = 8.8$  Hz, 1 H), 8.30 (d,  $J = 8.6$  Hz, 1 H), 8.19 (d,  $J = 8.6$  Hz, 1 H), 7.73 - 7.62 (m, 1 H), 7.58 - 7.48 (m, 1 H), 6.89 (d,  $J = 8.6$  Hz, 1 H).  $^{13}\text{C}$  NMR (101 MHz,  $\text{CDCl}_3$ )  $\delta$  157.4, 139.4, 129.3, 127.6, 127.4, 126.6, 125.7, 125.5, 124.0, 110.4. ATR-FTIR ( $\text{cm}^{-1}$ ): 3080, 2924, 1505, 1427, 1291, 826, 763, 652. HRMS ( $\text{ESI}^+$ ) Calcd for  $\text{C}_{12}\text{H}_7\text{D}_6\text{N}_2\text{O}_2$  [ $\text{M}+\text{H}$ ] $^+$ : 223.1348, found: 223.1347.

The corresponding non-deuterated product:

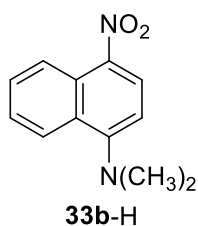

*N,N*-dimethyl-4-nitronaphthalen-1-amine **33b-H**:  $^1\text{H}$  NMR (400 MHz,  $\text{CDCl}_3$ )  $\delta$  8.78 (d,  $J = 8.7$  Hz, 1 H), 8.31 (d,  $J = 8.6$  Hz, 1 H), 8.20 (d,  $J = 8.6$  Hz, 1 H), 7.72 - 7.61 (m, 1 H), 7.59 - 7.49 (m, 1 H), 6.91 (d,  $J = 8.6$  Hz, 1 H), 3.04 (s, 6 H).  $^{13}\text{C}$  NMR (101 MHz,  $\text{CDCl}_3$ )  $\delta$  157.3, 139.5, 129.3, 127.6, 127.5, 126.6, 125.7, 125.5, 124.0, 110.5, 44.7.

2-(2-(bis(methyl- $d_3$ )amino)phenyl)ethan-1-ol (**33c**)

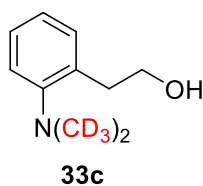

Following the general procedure C, the reaction of 2-(2-aminophenyl)ethan-1-ol **32c** (27.4 mg, 0.2 mmol, 1.0 equiv), **DMTT** (140.4 mg, 0.4 mmol, 2.0 equiv), Ni(OAc)<sub>2</sub>·4H<sub>2</sub>O (5.0 mg, 0.02 mmol, 0.1 equiv), KF (23.2 mg, 0.4 mmol, 2.0 equiv), and DCM/H<sub>2</sub>O (2 mL, v:v = 20/1) at room temperature for 12 h afford **33c** (24.3 mg, 71%, 99% D) as oil: <sup>1</sup>H NMR (500 MHz, CDCl<sub>3</sub>) δ 7.27 - 7.20 (m, 1 H), 7.22 - 7.16 (m, 1 H), 7.17 - 7.11 (m, 1 H), 7.11 - 7.04 (m, 1 H), 5.60 (bs, 1 H), 3.93 - 3.74 (m, 2 H), 3.07 - 2.90 (m, 2 H). <sup>13</sup>C NMR (126 MHz, CDCl<sub>3</sub>) δ 152.0, 136.5, 131.2, 127.7, 125.1, 120.0, 64.6, 36.4. ATR-FTIR (cm<sup>-1</sup>): 3295, 2924, 2854, 1490, 1262, 1045, 936, 760. HRMS (ESI<sup>+</sup>) Calcd for C<sub>10</sub>H<sub>10</sub>D<sub>6</sub>NO [M+H]<sup>+</sup>: 172.1603, found: 172.1605.

The corresponding non-deuterated product:

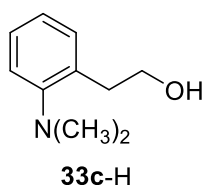

2-(2-(dimethylamino)phenyl)ethan-1-ol **33c-H**: <sup>1</sup>H NMR (500 MHz, CDCl<sub>3</sub>) δ 7.27 - 7.20 (m, 1 H), 7.23 - 7.17 (m, 2 H), 7.17 - 7.11 (m, 1 H), 7.11 - 7.04 (m, 1 H), 5.51 (bs, 1 H), 3.91 - 3.76 (m, 2 H), 3.06 - 2.92 (m, 2 H), 2.70 (s, 6 H). <sup>13</sup>C NMR (126 MHz, CDCl<sub>3</sub>) δ 152.0, 136.5, 131.2, 127.7, 125.2, 120.1, 64.6, 44.9, 36.4.

### 3-Fluoro-*N,N*-bis(methyl-*d*<sub>3</sub>)-4-morpholinoaniline (**33d**)

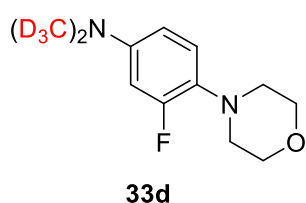

Following the general procedure C, the reaction of 3-fluoro-4-morpholinoaniline **32d** (39.2 mg, 0.2 mmol, 1.0 equiv), **DMTT** (140.4 mg, 0.4 mmol, 2.0 equiv), Ni(OAc)<sub>2</sub>·4H<sub>2</sub>O (5.0 mg, 0.02 mmol, 0.1 equiv), KF (23.2 mg, 0.4 mmol, 2.0 equiv), and DCM/H<sub>2</sub>O (2 mL, v:v = 20/1) at room temperature for 12 h afford **33d** (28.1 mg, 61%, 99% D) as a white solid: <sup>1</sup>H NMR (400 MHz, CDCl<sub>3</sub>) δ 6.89 (dd, *J* = 9.8, 8.7 Hz, 1H), 6.54 - 6.37 (m, 2 H), 3.94 - 3.78 (m, 4 H), 3.06 - 2.89 (m, 4 H). <sup>13</sup>C NMR (101 MHz, CDCl<sub>3</sub>) δ 156.9 (d, *J* = 243.7 Hz), 147.8 (d, *J* = 9.9 Hz), 129.9 (d, *J* = 9.7 Hz), 120.0 (d, *J* = 4.8 Hz), 108.1 (d, *J* = 2.7 Hz), 101.4 (d, *J* =

24.8 Hz), 67.2, 51.8.  $^{19}\text{F}$  NMR (376 MHz,  $\text{CDCl}_3$ )  $\delta$  -122.6. ATR-FTIR ( $\text{cm}^{-1}$ ): 2963, 2852, 1629, 1562, 1520, 1234, 1116, 936, 745. HRMS (ESI $^+$ ) Calcd for  $\text{C}_{12}\text{H}_{12}\text{D}_6\text{FN}_2\text{O}$   $[\text{M}+\text{H}]^+$ : 231.1774, found: 231.1771.

The corresponding non-deuterated product:

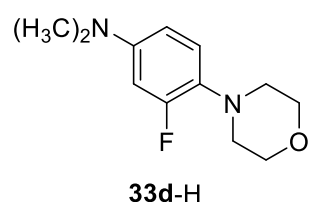

3-fluoro-*N,N*-dimethyl-4-morpholinoaniline **33d-H**:  $^1\text{H}$  NMR (400 MHz,  $\text{CDCl}_3$ )  $\delta$  6.89 (dd,  $J = 9.8, 8.7$  Hz, 1 H), 6.55 - 6.36 (m, 2 H), 3.93 - 3.79 (m, 4 H), 3.05 - 2.94 (m, 4 H), 2.89 (s, 6 H).  $^{13}\text{C}$  NMR (101 MHz,  $\text{CDCl}_3$ )  $\delta$  156.9 (d,  $J = 243.9$  Hz), 147.7 (d,  $J = 10.0$  Hz), 129.9 (d,  $J = 9.9$  Hz), 120.0 (d,  $J = 4.9$  Hz), 108.1 (d,  $J = 2.7$  Hz), 101.5 (d,  $J = 24.9$  Hz), 67.2, 51.8 (d,  $J = 2.3$  Hz), 40.8.  $^{19}\text{F}$  NMR (376 MHz,  $\text{CDCl}_3$ )  $\delta$  -122.6.

9-Ethyl-*N,N*-bis(methyl- $d_3$ )-9*H*-carbazol-3-amine (**33e**)

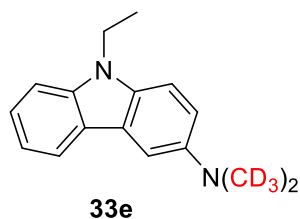

Following the general procedure C, the reaction of 9-ethyl-9*H*-carbazol-3-amine **32e** (42.0 mg, 0.2 mmol, 1.0 equiv), **DMTT** (140.4 mg, 0.4 mmol, 2.0 equiv),  $\text{Ni}(\text{OAc})_2 \cdot 4\text{H}_2\text{O}$  (5.0 mg, 0.02 mmol, 0.1 equiv),  $\text{KF}$  (23.2 mg, 0.4 mmol, 2.0 equiv), and  $\text{DCM}/\text{H}_2\text{O}$  (2 mL, v:v = 20/1) at room temperature for 12 h afford **33e** (36.3 mg, 74%, 99% D) as a yellow solid:  $^1\text{H}$  NMR (400 MHz,  $\text{CDCl}_3$ )  $\delta$  8.07 - 8.02 (m, 1 H), 7.54 - 7.47 (m, 1 H), 7.44 - 7.38 (m, 1 H), 7.34 - 7.27 (m, 2 H), 7.18 - 7.07 (m, 2 H), 4.29 (q,  $J = 7.2$  Hz, 2 H), 1.38 (t,  $J = 7.2$  Hz, 3 H).  $^{13}\text{C}$  NMR (101 MHz,  $\text{CDCl}_3$ )  $\delta$  145.3, 140.3, 134.0, 125.3, 123.4, 122.8, 120.3, 117.9, 115.2, 108.8, 108.3, 105.2, 37.5, 13.8. ATR-FTIR ( $\text{cm}^{-1}$ ): 3049, 2974, 1490, 1472, 1314, 1231, 851, 723. HRMS (ESI $^+$ ) Calcd for  $\text{C}_{16}\text{H}_{13}\text{D}_6\text{N}_2$   $[\text{M}+\text{H}]^+$ : 245.1919, found: 245.1918.

The corresponding non-deuterated product:

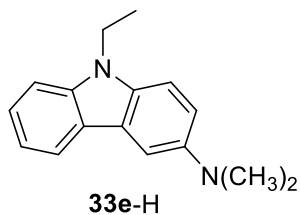

9-Ethyl-*N,N*-dimethyl-9*H*-carbazol-3-amine **33e-H**:  $^1\text{H}$  NMR (400 MHz,  $\text{CDCl}_3$ )  $\delta$  8.11-8.06 (m, 1 H), 7.56 (d,  $J = 2.4$  Hz, 1 H), 7.49 - 7.40 (m, 1 H), 7.41 - 7.29 (m, 2 H), 7.24 - 7.11 (m, 2 H), 4.33 (q,  $J = 7.2$  Hz, 2 H), 3.02 (s, 4 H), 1.42 (t,  $J = 7.2$  Hz, 3 H).  $^{13}\text{C}$  NMR (101 MHz,  $\text{CDCl}_3$ )  $\delta$  145.1, 140.3, 134.2, 125.3, 123.4, 122.8, 120.3, 118.0, 115.4, 108.8, 108.3, 105.5, 43.0, 37.5, 13.9.

*N,N*-bis(methyl- $d_3$ )-1*H*-indol-5-amine (**33f**)

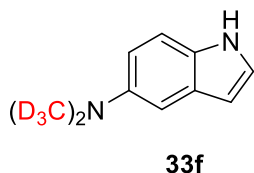

Following the general procedure C, the reaction of 1*H*-indol-5-amine **32f** (26.4 mg, 0.2 mmol, 1.0 equiv), **DMTT** (140.4 mg, 0.4 mmol, 2.0 equiv),  $\text{Ni}(\text{OAc})_2 \cdot 4\text{H}_2\text{O}$  (5.0 mg, 0.02 mmol, 0.1 equiv),  $\text{KF}$  (23.2 mg, 0.4 mmol, 2.0 equiv), and  $\text{DCM}/\text{H}_2\text{O}$  (2 mL, v:v = 20/1) at room temperature for 12 h afford **33f** (15.2 mg, 46%, 99% D) as oil:  $^1\text{H}$  NMR (400 MHz,  $\text{CDCl}_3$ )  $\delta$  8.05 (s, 1 H), 7.28 (d,  $J = 8.8$  Hz, 1 H), 7.13 (t,  $J = 2.8$  Hz, 1 H), 7.07 (d,  $J = 2.0$  Hz, 1 H), 6.92 (dd,  $J = 8.8, 2.4$  Hz, 1 H), 6.49 - 6.42 (m, 1 H).  $^{13}\text{C}$  NMR (101 MHz,  $\text{CDCl}_3$ )  $\delta$  146.0, 130.3, 128.5, 124.5, 113.1, 111.3, 104.9, 102.0. ATR-FTIR ( $\text{cm}^{-1}$ ): 3404, 1578, 1474, 1322, 1255, 1185, 752, 723. HRMS (ESI $^+$ ) Calcd for  $\text{C}_{10}\text{H}_7\text{D}_6\text{N}_2$  [ $\text{M}+\text{H}$ ] $^+$ : 167.1450, found: 167.1449.

The corresponding non-deuterated product:

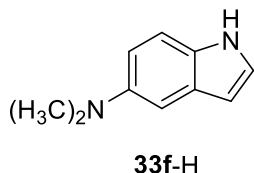

*N,N*-dimethyl-1*H*-indol-5-amine **33f-H**:  $^1\text{H}$  NMR (400 MHz,  $\text{CDCl}_3$ )  $\delta$  8.02 (s, 1 H), 7.28 (d,  $J = 8.8$  Hz, 1 H), 7.14 (t,  $J = 2.8$  Hz, 1 H), 7.07 (d,  $J = 2.3$  Hz, 1 H), 6.93 (dd,  $J = 8.8, 2.4$  Hz, 1 H), 6.50 - 6.42 (m, 1 H), 2.94 (s, 6 H).  $^{13}\text{C}$  NMR (101 MHz,  $\text{CDCl}_3$ )  $\delta$  146.1, 130.3, 128.5, 124.5, 113.2, 111.3, 104.9, 102.0, 43.0.

(*E*)-*N,N*-bis(methyl- $d_3$ )-4-(phenyldiazenyl)aniline (**33g**)



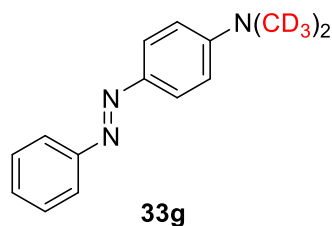

Following the general procedure C, the reaction of (*E*)-4-(phenyldiazenyl)aniline **32g** (39.4 mg, 0.2 mmol, 1.0 equiv), **DMTT** (140.4 mg, 0.4 mmol, 2.0 equiv), Ni(OAc)<sub>2</sub>·4H<sub>2</sub>O (5.0 mg, 0.02 mmol, 0.1 equiv), KF (23.2 mg, 0.4 mmol, 2.0 equiv), and DCM/H<sub>2</sub>O (2 mL, v:v = 20/1) at room temperature for 12 h afford **33g** (34.5 mg, 75%, 99% D) as a yellow solid: <sup>1</sup>H NMR (400 MHz, CDCl<sub>3</sub>) δ 7.95 - 7.80 (m, 4 H), 7.54 - 7.44 (m, 2 H), 7.44 - 7.35 (m, 1 H), 6.81 - 6.70 (m, 2 H). <sup>13</sup>C NMR (101 MHz, CDCl<sub>3</sub>) δ 153.2, 152.4, 143.6, 129.3, 128.9, 124.9, 122.2, 111.4. ATR-FTIR (cm<sup>-1</sup>): 3064, 3022, 1599, 1512, 1373, 1149, 913, 818, 747. HRMS (ESI<sup>+</sup>) Calcd for C<sub>14</sub>H<sub>10</sub>D<sub>6</sub>N<sub>3</sub> [M+H]<sup>+</sup>: 232.1715, found: 232.1715.

The corresponding non-deuterated product:

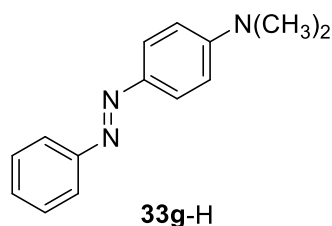

(*E*)-*N,N*-dimethyl-4-(phenyldiazenyl)aniline **33g-H**: <sup>1</sup>H NMR (400 MHz, CDCl<sub>3</sub>) δ 7.95 - 7.82 (m, 4 H), 7.54 - 7.44 (m, 2 H), 7.43 - 7.35 (m, 1 H), 6.81 - 6.72 (m, 2 H), 3.08 (s, 6 H). <sup>13</sup>C NMR (101 MHz, CDCl<sub>3</sub>) δ 153.2, 152.4, 143.6, 129.3, 128.9, 124.9, 122.2, 111.5, 40.3.

*N,N*-bis(methyl-*d*<sub>3</sub>)-2,2-diphenylpropan-1-amine (**33h**)

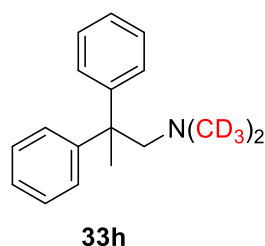

Following the general procedure C, the reaction of 2,2-diphenylpropan-1-amine hydrochloride **32h** (49.4 mg, 0.2 mmol, 1.0 equiv), **DMTT** (140.4 mg, 0.4 mmol, 2.0 equiv), Ni(OAc)<sub>2</sub>·4H<sub>2</sub>O (5.0 mg, 0.02 mmol, 0.1 equiv), KF (23.2 mg, 0.4 mmol, 2.0 equiv), and DCM/H<sub>2</sub>O (2 mL, v:v = 20/1) at room temperature for 12 h afford **33h** (30.1 mg, 61%, 99% D) as a white solid: <sup>1</sup>H NMR (400 MHz, CDCl<sub>3</sub>) δ 7.29 - 7.20 (m, 4 H), 7.19 - 7.13 (m, 1 H), 3.01 (s, 1 H). <sup>13</sup>C NMR (101 MHz, CDCl<sub>3</sub>) δ 148.9, 127.8, 127.6, 125.6, 70.1, 26.7. ATR-FTIR

(cm<sup>-1</sup>): 3025, 2967, 2935, 1494, 1444, 1200, 913, 746, 698. HRMS (ESI<sup>+</sup>) Calcd for C<sub>17</sub>H<sub>16</sub>D<sub>6</sub>N [M+H]<sup>+</sup>: 246.2123, found: 246.2123.

The corresponding non-deuterated product:

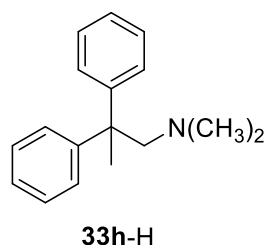

*N,N*-dimethyl-2,2-diphenylpropan-1-amine **33h-H**: <sup>1</sup>H NMR (400 MHz, CDCl<sub>3</sub>) δ 7.29 - 7.20 (m, 4 H), 7.20 - 7.13 (m, 1 H), 3.02 (s, 1 H), 2.02 (s, 3 H). <sup>13</sup>C NMR (101 MHz, CDCl<sub>3</sub>) δ 148.9, 127.8, 127.6, 125.6, 70.2, 48.4, 26.7.

*N,N*-bis(methyl-*d*<sub>3</sub>)-9*H*-fluoren-9-amine (**33i**)

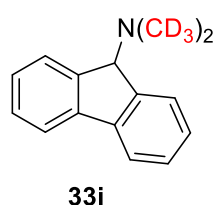

Following the general procedure C, the reaction of 9*H*-fluoren-9-amine **32i** (36.2 mg, 0.2 mmol, 1.0 equiv), **DMTT** (140.4 mg, 0.4 mmol, 2.0 equiv), Ni(OAc)<sub>2</sub>·4H<sub>2</sub>O (5.0 mg, 0.02 mmol, 0.1 equiv), KF (23.2 mg, 0.4 mmol, 2.0 equiv), and DCM/H<sub>2</sub>O (2 mL, v:v = 20/1) at room temperature for 12 h afford **33i** (22.0 mg, 51%, 99% D) as a oil: <sup>1</sup>H NMR (400 MHz, CDCl<sub>3</sub>) δ 7.70 (dt, *J* = 7.5, 0.9 Hz, 2 H), 7.64 (dd, *J* = 7.4, 1.0 Hz, 2 H), 7.42 - 7.34 (m, 1 H), 7.30 (td, *J* = 7.4, 1.2 Hz, 2 H), 4.85 (s, 1 H). <sup>13</sup>C NMR (101 MHz, CDCl<sub>3</sub>) δ 144.0, 141.0, 128.0, 127.0, 125.9, 119.7, 70.1. ATR-FTIR (cm<sup>-1</sup>): 2957, 2931, 1498, 1456, 1361, 1174, 882, 705. HRMS (ESI<sup>+</sup>) Calcd for C<sub>15</sub>H<sub>10</sub>D<sub>6</sub>N [M+H]<sup>+</sup>: 216.1654, found: 216.1653.

The corresponding non-deuterated product:

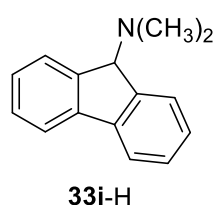

*N,N*-dimethyl-9*H*-fluoren-9-amine **33i-H**: <sup>1</sup>H NMR (400 MHz, CDCl<sub>3</sub>) δ 7.70 (dt, *J* = 7.5, 0.9 Hz, 2 H), 7.64 (dd, *J* = 7.4, 1.0 Hz, 2 H), 7.42 - 7.35 (m, 2 H), 7.30 (td, *J* = 7.5, 1.2 Hz, 2 H), 4.86 (s, 1 H), 2.35 (s, 6 H). <sup>13</sup>C NMR (101 MHz, CDCl<sub>3</sub>) δ 143.9, 141.0, 128.0, 127.0, 125.9, 119.7, 70.2, 41.2.

*N*-(4-(bis(methyl-*d*<sub>3</sub>)amino)-2,5-diethoxyphenyl)benzamide (**33j**)

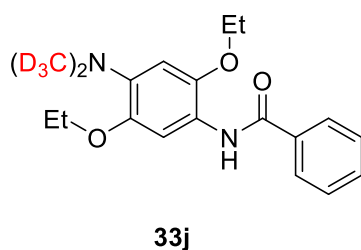

Following the general procedure C, the reaction of *N*-(4-amino-2,5-diethoxyphenyl)benzamide **32j** (60.0 mg, 0.2 mmol, 1.0 equiv), **DMTT** (140.4 mg, 0.4 mmol, 2.0 equiv), Ni(OAc)<sub>2</sub>·4H<sub>2</sub>O (5.0 mg, 0.02 mmol, 0.1 equiv), KF (23.2 mg, 0.4 mmol, 2.0 equiv), and DCM/H<sub>2</sub>O (2 mL, v:v = 20/1) at room temperature for 12 h afford **33j** (51.5 mg, 77%, 99% D) as a white solid: <sup>1</sup>H NMR (400 MHz, CDCl<sub>3</sub>) δ 8.50 (s, 1 H), 8.25 (s, 1 H), 7.93 - 7.82 (m, 2 H), 7.57 - 7.44 (m, 3 H), 6.56 (s, 1 H), 4.20 - 4.05 (m, 4 H), 1.52 - 1.40 (m, 6 H). <sup>13</sup>C NMR (101 MHz, CDCl<sub>3</sub>) δ 164.6, 145.3, 141.3, 138.2, 131.5, 128.7, 126.8, 122.1, 105.4, 103.3, 65.2, 64.0, 15.1, 14.9. ATR-FTIR (cm<sup>-1</sup>): 3430, 2978, 2930, 1669, 1522, 1419, 1243, 1202, 1046, 913, 708. HRMS (ESI<sup>+</sup>) Calcd for C<sub>19</sub>H<sub>19</sub>D<sub>6</sub>N<sub>2</sub>O<sub>3</sub> [M+H]<sup>+</sup>: 335.2236, found: 335.2237.

The corresponding non-deuterated product:

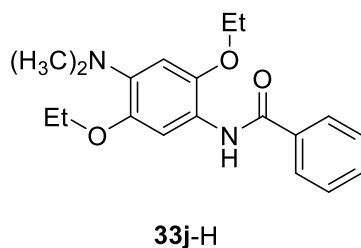

*N*-(4-(dimethylamino)-2,5-diethoxyphenyl)benzamide **33j-H**: <sup>1</sup>H NMR (400 MHz, CDCl<sub>3</sub>) δ 8.50 (s, 1 H), 8.25 (s, 1 H), 7.91 - 7.83 (m, 2 H), 7.54 - 7.45 (m, 3 H), 6.57 (s, 1 H), 4.18 - 4.09 (m, 4 H), 2.80 (s, 6 H), 1.52 - 1.40 (m, 6 H). <sup>13</sup>C NMR (101 MHz, CDCl<sub>3</sub>) δ 164.6, 145.4, 141.3, 138.2, 135.3, 131.5, 128.7, 126.8, 122.2, 105.4, 103.4, 65.2, 64.0, 43.3, 15.1, 14.9.

3-(4-(Bis(methyl-*d*<sub>3</sub>)amino)phenyl)-3-ethylpiperidine-2,6-dione (**33k**)

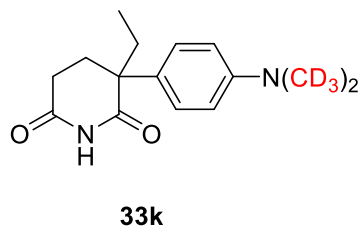

Following the general procedure C, the reaction of aminoglutethimide **32k** (46.4 mg, 0.2 mmol, 1.0 equiv), **DMTT** (140.4 mg, 0.4 mmol, 2.0 equiv), Ni(OAc)<sub>2</sub>·4H<sub>2</sub>O (5.0 mg, 0.02 mmol, 0.1 equiv), KF

(23.2 mg, 0.4 mmol, 2.0 equiv), and DCM/H<sub>2</sub>O (2 mL, v:v = 20/1) at room temperature for 12 h afford **33k** (36.1 mg, 68%, 99% D) as a white solid: <sup>1</sup>H NMR (500 MHz, CDCl<sub>3</sub>) δ 8.05 (s, 1 H), 7.12 (d, *J* = 8.9 Hz, 2 H), 6.68 (d, *J* = 8.9 Hz, 2 H), 2.62 - 2.53 (m, 1 H), 2.52 - 2.41 (m, 1 H), 2.37 - 2.29 (m, 1 H), 2.22 - 2.12 (m, 1 H), 2.06 - 1.95 (m, 1 H), 1.94 - 1.83 (m, 1 H), 0.85 (t, *J* = 7.4 Hz, 3H). <sup>13</sup>C NMR (126 MHz, CDCl<sub>3</sub>) δ 175.7, 172.6 149.7, 126.9, 125.6, 112.5, 50.1, 32.9, 29.4, 26.9, 9.0. ATR-FTIR (cm<sup>-1</sup>): 3291, 3190, 3028, 1659, 1529, 1451, 1275, 1016, 765, 749. HRMS (ESI<sup>+</sup>) Calcd for C<sub>15</sub>H<sub>15</sub>D<sub>6</sub>N<sub>2</sub>O<sub>2</sub> [M+H]<sup>+</sup>: 267.1974, found: 267.1974.

The corresponding non-deuterated product:

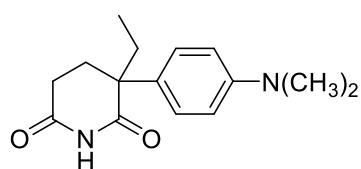

**33k-H**

3-(4-(dimethylamino)phenyl)-3-ethylpiperidine-2,6-dione **33k-H**:

<sup>1</sup>H NMR (400 MHz, CDCl<sub>3</sub>) δ 7.97 (s, 1 H), 7.12 (d, *J* = 8.9 Hz, 2 H), 6.69 (d, *J* = 8.9 Hz, 2 H), 2.94 (s, 6 H), 2.64 - 2.52 (m, 1 H), 2.53 - 2.39 (m, 1 H), 2.39 - 2.28 (m, 1 H), 2.24 - 2.11 (m, 1 H), 2.08 - 1.94 (m, 1 H), 1.96 - 1.81 (m, 1 H), 0.85 (t, *J* = 7.4 Hz, 3 H). <sup>13</sup>C NMR (101 MHz, CDCl<sub>3</sub>) δ 175.6, 172.6, 149.7, 126.9, 125.7, 112.6, 50.1, 40.4, 32.9, 29.4, 26.9, 9.0.

4-(bis(methyl-*d*<sub>3</sub>)amino)-1,5-dimethyl-2-phenyl-1,2-dihydro-3*H*-pyrazol-3-one (**33l**)

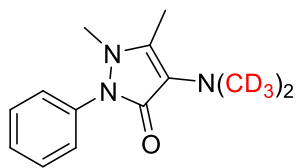

**33l**

Following the general procedure C, the reaction of 4-aminoantipyrene **32l** (40.6 mg, 0.2 mmol, 1.0 equiv), **DMTT** (140.4 mg, 0.4 mmol, 2.0 equiv), Ni(OAc)<sub>2</sub>·4H<sub>2</sub>O (5.0 mg, 0.02 mmol, 0.1 equiv), KF (23.2 mg, 0.4 mmol, 2.0

equiv), and DCM/H<sub>2</sub>O (2 mL, v:v = 20/1) at room temperature for 12 h afford **33l** (19.4 mg, 41%, 99% D) as a yellow solid: <sup>1</sup>H NMR (400 MHz, CDCl<sub>3</sub>) δ 7.45 - 7.36 (m, 4 H), 7.25 - 7.19 (m, 1 H), 2.94 (s, 3 H), 2.19 (s, 3 H). <sup>13</sup>C NMR (101 MHz, CDCl<sub>3</sub>) δ 163.6, 150.1, 135.3, 128.9, 125.8, 123.1, 36.7, 10.3. ATR-FTIR (cm<sup>-1</sup>):

3025, 2911, 1657, 1593, 1458, 1504, 758, 698. HRMS (ESI<sup>+</sup>) Calcd for C<sub>13</sub>H<sub>12</sub>D<sub>6</sub>N<sub>3</sub>O [M+H]<sup>+</sup>: 238.1821, found: 238.1821.

The corresponding non-deuterated product:

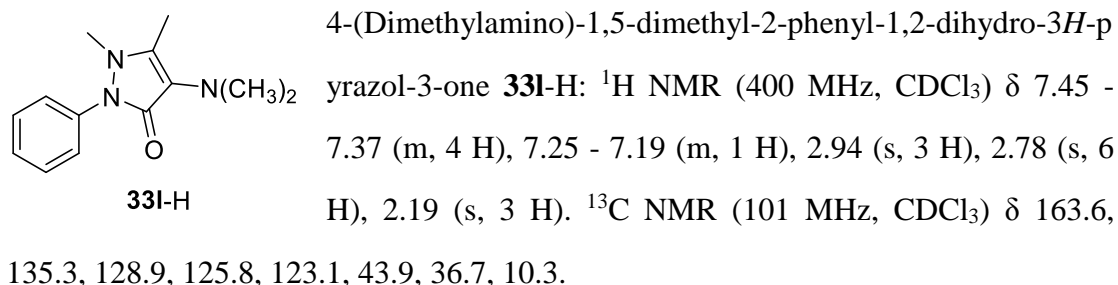

*N*-(methyl-*d*<sub>3</sub>)-*N*-phenylaniline (**33m**)

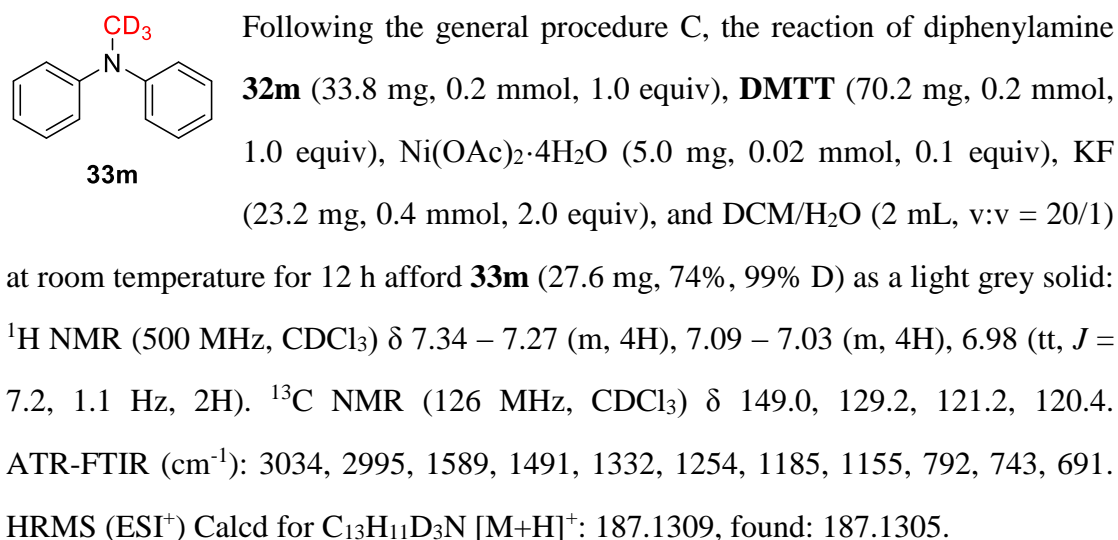

The corresponding non-deuterated product:

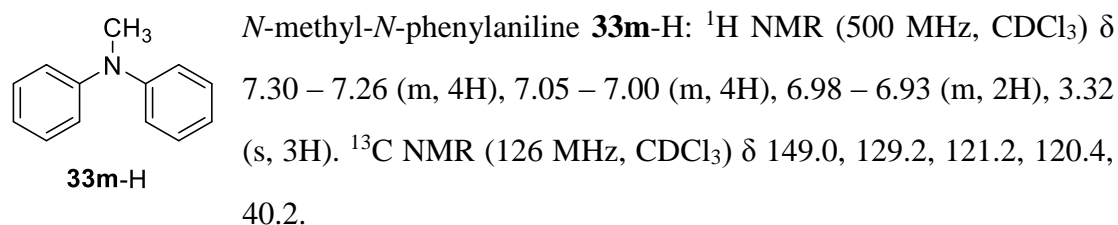

## Section S7. Pd-catalyzed C–H bond methylation-d3

### General Procedure D:

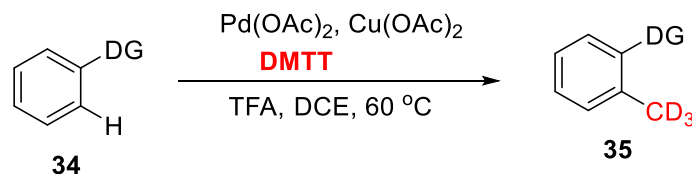

The 25 mL Schlenk tube was purged with argon for three times. Then the tube was added substrates **34** (0.2 mmol, 1.0 equiv), **DMTT** (0.24-0.6 mmol, 1.2-3.0 equiv), Pd(OAc)<sub>2</sub> (4.5 mg, 0.02 mmol, 0.1 equiv), Cu(OAc)<sub>2</sub> (43.6 mg, 0.24 mmol, 1.2 equiv), TFA (74.3 μL, d = 1.535 g/mL, 1.0 mmol, 5.0 equiv), and DCE (2 mL). The mixture was stirring at 60 °C for 12 hours. Then the resulting mixture was cooled down and concentrated in vacuo. The residue was purified by column chromatography to afford the corresponding product **35**.

### 2-(4-Methyl-2,6-bis(methyl-*d*<sub>3</sub>)phenyl)pyridine (**35a**)

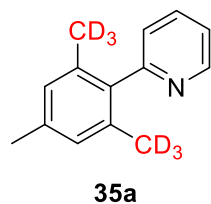

Following the general procedure D, the reaction of 2-(*p*-tolyl)pyridine **34a** (33.8 mg, 0.2 mmol, 1.0 equiv), **DMTT** (210.6 mg, 0.6 mmol, 3.0 equiv), Pd(OAc)<sub>2</sub> (4.5 mg, 0.02 mmol, 0.1 equiv), Cu(OAc)<sub>2</sub> (43.6 mg, 0.24 mmol, 1.2 equiv), TFA (74.3 μL, d = 1.535 g/mL, 1.0 mmol, 5.0 equiv), and DCE (2 mL) at 60 °C for 12 hours afford **35a** (25.1 mg, 62%, 99% D) as oil: <sup>1</sup>H NMR (400 MHz, CDCl<sub>3</sub>) δ 8.72 (s, 1 H), 7.74 (td, *J* = 7.6, 1.8 Hz, 1 H), 7.26 - 7.17 (m, 2 H), 6.93 (s, 2 H), 2.32 (s, 3 H). <sup>13</sup>C NMR (101 MHz, CDCl<sub>3</sub>) δ 160.0, 149.5, 137.7, 137.3, 136.1, 135.5, 128.2, 124.7, 121.5, 21.1. ATR-FTIR (cm<sup>-1</sup>): 3004, 2921, 1608, 1586, 1563, 1451, 1424, 913, 712. HRMS (ESI<sup>+</sup>) Calcd for C<sub>14</sub>H<sub>10</sub>D<sub>6</sub>N [M+H]<sup>+</sup>: 204.1654, found: 204.1654.

The corresponding non-deuterated product:

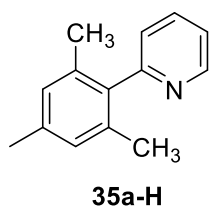

2-Mesitylpyridine **35a-H**:  $^1\text{H}$  NMR (400 MHz,  $\text{CDCl}_3$ )  $\delta$  8.71 (s, 1 H), 7.75 (td,  $J = 7.7, 1.8$  Hz, 1 H), 7.28 - 7.16 (m, 3 H), 6.93 (s, 2 H), 2.32 (s, 3 H), 2.01 (s, 6 H).  $^{13}\text{C}$  NMR (101 MHz,  $\text{CDCl}_3$ )  $\delta$  160.0, 149.5, 137.4, 136.3, 135.6, 128.2, 124.7, 121.5, 21.1, 20.1.

### 3-Methyl-2-(2-(methyl- $d_3$ )phenyl)pyridine (**35b**)

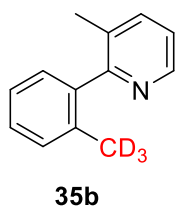

Following the general procedure D, the reaction of 3-methyl-2-phenylpyridine **34b** (33.8 mg, 0.2 mmol, 1.0 equiv), **DMTT** (105.3 mg, 0.3 mmol, 1.5 equiv),  $\text{Pd}(\text{OAc})_2$  (4.5 mg, 0.02 mmol, 0.1 equiv),  $\text{Cu}(\text{OAc})_2$  (43.6 mg, 0.24 mmol, 1.2 equiv), TFA (74.3  $\mu\text{L}$ ,  $d = 1.535$  g/mL, 1.0 mmol, 5.0 equiv), and DCE (2 mL) at 60  $^\circ\text{C}$  for 12 hours afford **35b** (24.2 mg, 65%, 99% D) as oil:  $^1\text{H}$  NMR (400 MHz,  $\text{CDCl}_3$ )  $\delta$  8.51 (dd,  $J = 5.0, 1.6$  Hz, 1 H), 7.63 - 7.54 (m, 1 H), 7.31 - 7.22 (m, 3 H), 7.23 - 7.12 (m, 2 H), 2.11 (s, 3 H).  $^{13}\text{C}$  NMR (101 MHz,  $\text{CDCl}_3$ )  $\delta$  146.7, 137.7, 130.1, 128.4, 127.9, 125.7, 122.1, 19.0. ATR-FTIR ( $\text{cm}^{-1}$ ): 2599, 2853, 1566, 1447, 1276, 1261, 913, 790, 748. HRMS (ESI $^+$ ) Calcd for  $\text{C}_{13}\text{H}_{11}\text{D}_3\text{N}$   $[\text{M}+\text{H}]^+$ : 187.1309, found: 187.1309.

The corresponding non-deuterated product:

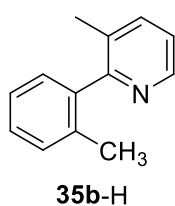

3-Methyl-2-(*o*-tolyl)pyridine **35b-H**:  $^1\text{H}$  NMR (400 MHz,  $\text{CDCl}_3$ )  $\delta$  8.50 (dd,  $J = 4.9, 1.6$  Hz, 1 H), 7.64 - 7.54 (m, 1 H), 7.31 - 7.23 (m, 3 H), 7.21 - 7.13 (m, 2 H), 2.10 (s, 3 H), 2.08 (s, 3 H).  $^{13}\text{C}$  NMR (101 MHz,  $\text{CDCl}_3$ )  $\delta$  159.6, 146.7, 140.2, 137.7, 135.5, 131.5, 130.1, 128.4, 127.9, 125.7, 122.1, 29.7, 19.3, 19.0.

### *N*-(2-(Methyl- $d_3$ )phenyl)acetamide (**35c**)

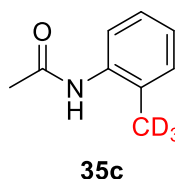

Following the general procedure D, the reaction of *N*-phenylacetamide **34a** (27.0 mg, 0.2 mmol, 1.0 equiv), **DMTT** (84.2 mg, 0.24 mmol, 1.2 equiv),  $\text{Pd}(\text{OAc})_2$  (4.5 mg, 0.02 mmol, 0.1 equiv),  $\text{Cu}(\text{OAc})_2$  (43.6 mg, 0.24 mmol, 1.2 equiv), TFA (74.3  $\mu\text{L}$ ,  $d = 1.535$  g/mL, 1.0 mmol, 5.0 equiv), and DCE (2 mL) at 60  $^\circ\text{C}$  for 12 hours afford **35c** (20.7

mg, 68%, 99% D) as oil:  $^1\text{H}$  NMR (400 MHz,  $\text{CDCl}_3$ )  $\delta$  7.68 (d,  $J = 7.9$  Hz, 1 H), 7.24 - 7.13 (m, 3 H), 7.12 - 7.02 (m, 1 H), 2.17 (s, 3 H).  $^{13}\text{C}$  NMR (101 MHz,  $\text{CDCl}_3$ )  $\delta$  168.5, 135.6, 130.4, 129.6, 126.6, 125.4, 123.6, 24.1. ATR-FTIR ( $\text{cm}^{-1}$ ): 3178, 3083, 1687, 1364, 1271, 1198, 913, 748. HRMS ( $\text{ESI}^+$ ) Calcd for  $\text{C}_9\text{H}_9\text{D}_3\text{NO}$   $[\text{M}+\text{H}]^+$ : 153.1102, found: 153.1100.

The corresponding non-deuterated product:

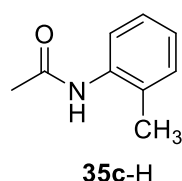

*N*-(*o*-tolyl)acetamide **35c-H**:  $^1\text{H}$  NMR (400 MHz,  $\text{CDCl}_3$ )  $\delta$  7.70 (d,  $J = 8.0$  Hz, 1 H), 7.24 - 7.11 (m, 3 H), 7.12 - 7.02 (m, 1 H), 2.24 (s, 3 H), 2.18 (s, 3 H).  $^{13}\text{C}$  NMR (101 MHz,  $\text{CDCl}_3$ )  $\delta$  168.4, 135.6, 130.4, 129.6, 126.6, 125.3, 123.6, 24.2, 17.7.

*N*-(4-Ethoxy-2-(methyl- $d_3$ )phenyl)acetamide (**35d**)

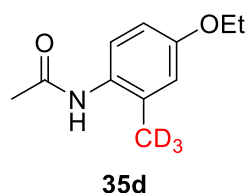

Following the general procedure D, the reaction of *N*-(4-ethoxyphenyl)acetamide **34d** (35.8 mg, 0.2 mmol, 1.0 equiv), **DMTT** (84.2 mg, 0.24 mmol, 1.2 equiv),  $\text{Pd}(\text{OAc})_2$  (4.5 mg, 0.02 mmol, 0.1 equiv),  $\text{Cu}(\text{OAc})_2$  (43.6 mg, 0.24 mmol, 1.2 equiv), TFA (74.3  $\mu\text{L}$ ,  $d = 1.535$  g/mL, 1.0 mmol, 5.0 equiv), and DCE (2 mL) at 60  $^\circ\text{C}$  for 12 hours afford **35d** (29.5 mg, 75%, 99% D) as oil:  $^1\text{H}$  NMR (400 MHz,  $\text{CDCl}_3$ )  $\delta$  7.35 (d,  $J = 8.3$  Hz, 1 H), 7.24 - 6.96 (m, 1 H), 6.78 - 6.55 (m, 2 H), 3.97 (q,  $J = 7.1$  Hz, 2 H), 2.13 (s, 3 H), 1.38 (t,  $J = 7.0$  Hz, 3 H).  $^{13}\text{C}$  NMR (101 MHz,  $\text{CDCl}_3$ )  $\delta$  169.1, 156.8, 133.0, 128.3, 126.2, 116.4, 112.0, 63.5, 14.8. ATR-FTIR ( $\text{cm}^{-1}$ ): 3271, 2980, 2928, 1657, 1531, 1479, 1287, 1180, 1049, 913, 746. HRMS ( $\text{ESI}^+$ ) Calcd for  $\text{C}_{11}\text{H}_{13}\text{D}_3\text{NO}_2$   $[\text{M}+\text{H}]^+$ : 197.1364, found: 197.1364.

The corresponding non-deuterated product:

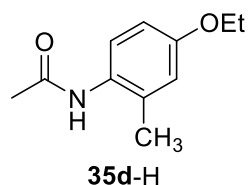

*N*-(4-Ethoxy-2-methylphenyl)acetamide **35d-H**:  $^1\text{H}$  NMR (400 MHz,  $\text{CDCl}_3$ )  $\delta$  7.39 (d,  $J = 8.3$  Hz, 1 H), 7.20 - 7.90 (m, 1 H), 6.80 - 6.53 (m, 2 H), 3.98 (q,  $J = 6.9$  Hz, 2 H), 2.19 (s, 3 H), 2.15 (s, 3 H), 1.38 (t,  $J = 7.0$  Hz, 3 H).  $^{13}\text{C}$  NMR (101 MHz,  $\text{CDCl}_3$ )  $\delta$



169.1, 156.8, 133.0, 128.3, 126.2, 116.5, 112.1, 63.5, 18.1, 14.8.

## Section S8. Methylenation of trifluoromethyl substituted alkenes

### General Procedure E:

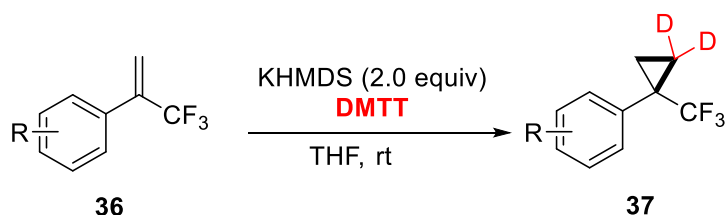

The 25 mL Schlenk tube was purged with argon for three times. Then the tube was added substrates **36** (0.2 mmol, 1.0 equiv), **DMTT** (0.4 mmol, 2.0 equiv), KHMDS (0.4 mmol, 2.0 equiv), and THF (2 mL). The reaction was stirring at room temperature for 12 hours. Then the resulting mixture was concentrated in vacuo and the residue was purified by column chromatography to afford the corresponding product **37**.

### 2-Methoxy-6-(1-(trifluoromethyl)cyclopropyl-2,2-*d*<sub>2</sub>)naphthalene (**37a**)

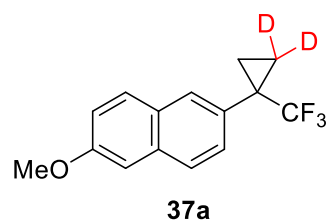

Following the general procedure E, the reaction of 2-methoxy-6-(3,3,3-trifluoroprop-1-en-2-yl)naphthalene **36a** (50.4 mg, 0.2 mmol, 1.0 equiv), **DMTT** (140.4 mg, 0.4 mmol, 2.0 equiv), KHMDS (0.4 mL, 1.0 M in THF, 0.4 mmol, 2.0 equiv), and THF (2 mL) at room temperature for 12 hours afford **37a** (38.4 mg, 72%, 99% D) as oil: <sup>1</sup>H NMR (400 MHz, CDCl<sub>3</sub>) δ 7.87 - 7.77 (m, 1 H), 7.75 - 7.68 (m, 2 H), 7.56 - 7.44 (m, 1 H), 7.18 - 7.12 (m, 2 H), 3.92 (s, 3 H), 1.42 - 1.36 (m, 1 H), 1.19 - 1.01 (m, 1 H). <sup>13</sup>C NMR (101 MHz, CDCl<sub>3</sub>) δ 158.1, 134.3, 131.4, 130.4, 129.9, 129.4, 129.2, 126.8, 126.6 (q, J = 273.3 Hz), 119.2, 105.5, 55.3,

9.6 (q,  $J = 2.5$  Hz).  $^{19}\text{F}$  NMR (376 MHz,  $\text{CDCl}_3$ )  $\delta$  -69.9. ATR-FTIR ( $\text{cm}^{-1}$ ): 3008, 2940, 1608, 1487, 1353, 1263, 1198, 913, 747. HRMS (ESI<sup>+</sup>) Calcd for  $\text{C}_{15}\text{H}_{12}\text{D}_2\text{F}_3\text{O}$   $[\text{M}+\text{H}]^+$ : 269.1117, found: 269.1110.

The corresponding non-deuterated product:

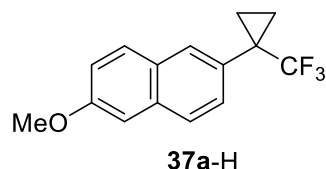

2-Methoxy-6-(1-(trifluoromethyl)cyclopropyl)naphthalene  
**37a-H**:  $^1\text{H}$  NMR (400 MHz,  $\text{CDCl}_3$ )  $\delta$  7.86 - 7.77 (m, 1 H),  
7.74 - 7.68 (m, 2 H), 7.54 - 7.45 (m, 1 H), 7.18 - 7.12 (m,  
2 H), 3.92 (s, 3 H), 1.43 - 1.37 (m, 2 H), 1.18 - 1.05 (m, 2

H).  $^{13}\text{C}$  NMR (101 MHz,  $\text{CDCl}_3$ )  $\delta$  158.1, 134.3, 131.2, 130.4, 129.9, 129.4, 129.2, 126.8, 126.5 (q,  $J = 273.4$  Hz), 119.2, 105.5, 55.3, 9.8 (q,  $J = 2.6$  Hz).  $^{19}\text{F}$  NMR (376 MHz,  $\text{CDCl}_3$ )  $\delta$  -70.0.

5-(1-(Trifluoromethyl)cyclopropyl-2,2- $d_2$ )benzo[*d*][1,3]dioxole (**37b**)

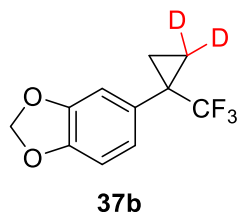

Following the general procedure *E*, the reaction of  
5-(3,3,3-trifluoroprop-1-en-2-yl)benzo[*d*][1,3]dioxole **36b** (43.2  
mg, 0.2 mmol, 1.0 equiv), **DMTT** (140.4 mg, 0.4 mmol, 2.0  
equiv), KHMDS (0.4 mL, 1.0 M in THF, 0.4 mmol, 2.0 equiv),

and THF (2 mL) at room temperature for 12 hours afford **37b** (23.1 mg, 50%, 99% D)  
as oil:  $^1\text{H}$  NMR (400 MHz,  $\text{CDCl}_3$ )  $\delta$  6.97 - 6.83 (m, 2 H), 6.80 - 6.71 (m, 1 H), 5.96  
(s, 2 H), 1.33 - 1.26 (m, 1 H), 1.04 - 0.91 (m, 1 H).  $^{13}\text{C}$  NMR (101 MHz,  $\text{CDCl}_3$ )  $\delta$   
147.6, 147.4, 124.9, 111.6, 108.0, 101.2.  $^{19}\text{F}$  NMR (376 MHz,  $\text{CDCl}_3$ )  $\delta$  -70.42.  
ATR-FTIR ( $\text{cm}^{-1}$ ): 2989, 2924, 1508, 1275, 1261, 1136, 1041, 913, 748. HRMS  
(ESI<sup>+</sup>) Calcd for  $\text{C}_{11}\text{H}_8\text{D}_2\text{F}_3\text{O}_2$   $[\text{M}+\text{H}]^+$ : 233.0753, found: 233.0750.

The corresponding non-deuterated product:

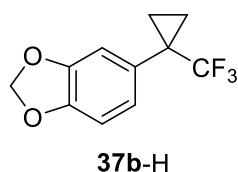

5-(1-(Trifluoromethyl)cyclopropyl)benzo[*d*][1,3]dioxole **37b-H**:  
 $^1\text{H}$  NMR (400 MHz,  $\text{CDCl}_3$ )  $\delta$  6.95 - 6.87 (m, 2 H), 6.78 - 6.72  
(m, 1 H), 5.96 (s, 2 H), 1.34 - 1.26 (m, 2 H), 1.09 - 0.91 (m, 2 H).  
 $^{13}\text{C}$  NMR (101 MHz,  $\text{CDCl}_3$ )  $\delta$  124.9, 111.6, 108.0, 101.2, 10.0

(q,  $J = 2.4$  Hz).  $^{19}\text{F}$  NMR (376 MHz,  $\text{CDCl}_3$ )  $\delta$  -70.43.

#### 1-Bromo-4-(1-(trifluoromethyl)cyclopropyl-2,2- $d_2$ )benzene (**37c**)

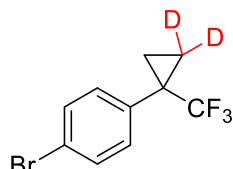

**37c**

Following the general procedure *E*, the reaction of 1-bromo-4-(3,3,3-trifluoroprop-1-en-2-yl)benzene **36c** (50.0 mg, 0.2 mmol, 1.0 equiv), **DMTT** (140.4 mg, 0.4 mmol, 2.0 equiv), **KHMDS** (0.4 mL, 1.0 M in THF, 0.4 mmol, 2.0 equiv), and THF (2 mL) at room temperature for 12 hours afford **37c** (34.0 mg, 64%, 99% D) as oil:  $^1\text{H}$  NMR (400 MHz,  $\text{CDCl}_3$ )  $\delta$  7.51 - 7.43 (m, 2 H), 7.37 - 7.25 (m, 2 H), 1.39 - 1.31 (m, 1 H), 1.01 - 0.96 (m, 1 H).  $^{13}\text{C}$  NMR (101 MHz,  $\text{CDCl}_3$ )  $\delta$  135.1, 132.9, 131.5, 126.0 (q,  $J = 273.4$  Hz), 122.5, 9.6 (q,  $J = 2.2$  Hz).  $^{19}\text{F}$  NMR (376 MHz,  $\text{CDCl}_3$ )  $\delta$  -70.2. ATR-FTIR ( $\text{cm}^{-1}$ ): 2990, 1491, 1348, 1157, 1012, 913, 825, 747. HRMS (ESI<sup>+</sup>) Calcd for  $\text{C}_{10}\text{H}_7\text{D}_2\text{BrF}_3$  [ $\text{M}+\text{H}$ ]<sup>+</sup>: 266.9950, found: 266.9956.

The corresponding non-deuterated product:

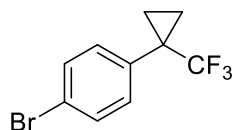

**37c-H**

1-Bromo-4-(1-(trifluoromethyl)cyclopropyl)benzene **37c-H**:  $^1\text{H}$  NMR (400 MHz,  $\text{CDCl}_3$ )  $\delta$  7.51 - 7.43 (m, 2 H), 7.35 - 7.26 (m, 2 H), 1.39 - 1.31 (m, 2 H), 1.11 - 0.93 (m, 2 H).  $^{13}\text{C}$  NMR (101 MHz,  $\text{CDCl}_3$ )  $\delta$  135.1, 132.9, 131.5, 126.0 (q,  $J = 273.4$  Hz), 122.5, 9.75 (q,  $J = 1.6$  Hz).  $^{19}\text{F}$  NMR (376 MHz,  $\text{CDCl}_3$ )  $\delta$  -70.2.

#### 1-Methyl-3-(1-(trifluoromethyl)cyclopropyl-2,2- $d_2$ )benzene (**37d**)

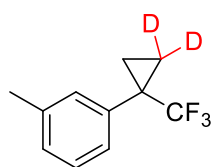

**37d**

Following the general procedure *E*, the reaction of 1-methyl-3-(3,3,3-trifluoroprop-1-en-2-yl)benzene **36d** (37.2 mg, 0.2 mmol, 1.0 equiv), **DMTT** (140.4 mg, 0.4 mmol, 2.0 equiv), **KHMDS** (0.4 mL, 1.0 M in THF, 0.4 mmol, 2.0 equiv), and THF (2 mL) at room temperature for 12 hours afford **37d** (27.5 mg, 68%, 99% D) as oil:  $^1\text{H}$  NMR (400 MHz,  $\text{CDCl}_3$ )  $\delta$  7.29 - 7.20 (m, 3 H), 7.16 - 7.11 (m, 1 H), 2.36 (s, 3 H), 1.35 - 1.28 (m, 2 H), 1.06 - 0.97 (m, 1 H).  $^{13}\text{C}$  NMR (101 MHz,  $\text{CDCl}_3$ )  $\delta$  138.0, 132.7, 132.0, 129.0, 128.3, 128.2, 126.4 (q,  $J = 273.3$  Hz), 21.3, 9.5 (q,  $J = 2.6$  Hz).

ATR-FTIR (cm<sup>-1</sup>): 3027, 2925, 1610, 1491, 1352, 1218, 913, 785, 746. HRMS (ESI<sup>+</sup>)

Calcd for C<sub>11</sub>H<sub>10</sub>D<sub>2</sub>F<sub>3</sub> [M+H]<sup>+</sup>: 203.1011, found: 203.1005.

The corresponding non-deuterated product:

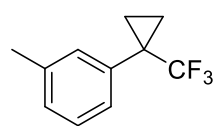

**37d-H**

1-Methyl-3-(1-(trifluoromethyl)cyclopropyl)benzene **37d-H**: <sup>1</sup>H

NMR (400 MHz, CDCl<sub>3</sub>) δ 7.31 - 7.18 (m, 3 H), 7.16 - 7.10 (m, 1

H), 2.36 (s, 3 H), 1.36 - 1.31 (m, 2 H), 1.10 - 0.95 (m, 2 H). <sup>13</sup>C

NMR (101 MHz, CDCl<sub>3</sub>) δ 138.0 132.7, 132.0, 129.0, 128.3, 128.2, 126.4 (q, *J* =

273.4 Hz), 21.3, 9.6 (q, *d* = 1.7 Hz). <sup>19</sup>F NMR (376 MHz, CDCl<sub>3</sub>) δ -70.1.

## Section S9. Crystallographic Data

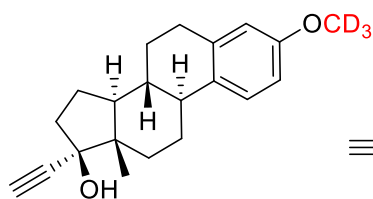

**21b**

≡

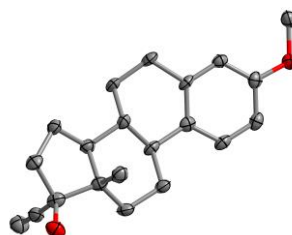

CCDC: 1892897

Crystal data and structure refinement:

|                      |                                                                                                                                    |
|----------------------|------------------------------------------------------------------------------------------------------------------------------------|
| Empirical formula    | C <sub>21</sub> H <sub>26</sub> O <sub>2</sub>                                                                                     |
| Formula weight       | 310.42                                                                                                                             |
| Temperature          | 173(2) K                                                                                                                           |
| Wavelength           | 1.54178 Å                                                                                                                          |
| Crystal system       | Monoclinic                                                                                                                         |
| Space group          | P2 <sub>1</sub>                                                                                                                    |
| Unit cell dimensions | <i>a</i> = 6.8051(6) Å <i>α</i> = 90°.<br><i>b</i> = 39.706(4) Å <i>β</i> = 117.644(4)°.<br><i>c</i> = 6.9518(6) Å <i>γ</i> = 90°. |
| Volume               | 1664.0(3) Å <sup>3</sup>                                                                                                           |

|                                   |                                             |
|-----------------------------------|---------------------------------------------|
| Z                                 | 4                                           |
| Density (calculated)              | 1.239 Mg/m <sup>3</sup>                     |
| Absorption coefficient            | 0.604 mm <sup>-1</sup>                      |
| F(000)                            | 672                                         |
| Crystal size                      | 0.190 x 0.180 x 0.150 mm <sup>3</sup>       |
| Theta range for data collection   | 4.454 to 68.548°.                           |
| Index ranges                      | -7<=h<=8, -45<=k<=47, -8<=l<=7              |
| Reflections collected             | 9682                                        |
| Independent reflections           | 5231 [R(int) = 0.0468]                      |
| Completeness to theta = 67.679°   | 98.2 %                                      |
| Refinement method                 | Full-matrix least-squares on F <sup>2</sup> |
| Data / restraints / parameters    | 5231 / 1 / 421                              |
| Goodness-of-fit on F <sup>2</sup> | 1.166                                       |
| Final R indices [I>2sigma(I)]     | R1 = 0.0739, wR2 = 0.1984                   |
| R indices (all data)              | R1 = 0.0743, wR2 = 0.1986                   |
| Absolute structure parameter      | 0.13(13)                                    |
| Extinction coefficient            | n/a                                         |
| Largest diff. peak and hole       | 0.370 and -0.344 e.Å <sup>-3</sup>          |

Bond lengths [Å] and angles [°]:

|            |          |            |          |
|------------|----------|------------|----------|
| C(1)-O(1)  | 1.438(8) | C(3)-H(3A) | 0.9500   |
| C(1)-H(1A) | 0.9800   | C(4)-C(5)  | 1.393(9) |
| C(1)-H(1B) | 0.9800   | C(4)-H(4)  | 0.9500   |
| C(1)-H(1C) | 0.9800   | C(5)-C(6)  | 1.405(8) |
| C(2)-O(1)  | 1.367(8) | C(5)-C(11) | 1.521(9) |
| C(2)-C(3)  | 1.389(9) | C(6)-C(7)  | 1.399(9) |
| C(2)-C(7)  | 1.390(9) | C(6)-C(8)  | 1.520(8) |
| C(3)-C(4)  | 1.387(9) | C(7)-H(7)  | 0.9500   |

|              |          |              |           |
|--------------|----------|--------------|-----------|
| C(8)-C(9)    | 1.512(9) | C(17)-H(17B) | 0.9900    |
| C(8)-H(8A)   | 0.9900   | C(18)-O(2)   | 1.412(8)  |
| C(8)-H(8B)   | 0.9900   | C(18)-C(20)  | 1.477(10) |
| C(9)-C(10)   | 1.522(8) | C(19)-H(19A) | 0.9800    |
| C(9)-H(9A)   | 0.9900   | C(19)-H(19B) | 0.9800    |
| C(9)-H(9B)   | 0.9900   | C(19)-H(19C) | 0.9800    |
| C(10)-C(15)  | 1.519(8) | C(20)-C(21)  | 1.185(11) |
| C(10)-C(11)  | 1.560(8) | C(21)-H(21)  | 0.9500    |
| C(10)-H(10)  | 1.0000   | C(22)-O(4)   | 1.421(8)  |
| C(11)-C(12)  | 1.532(8) | C(22)-H(22A) | 0.9800    |
| C(11)-H(11)  | 1.0000   | C(22)-H(22B) | 0.9800    |
| C(12)-C(13)  | 1.543(9) | C(22)-H(22C) | 0.9800    |
| C(12)-H(12A) | 0.9900   | C(23)-O(4)   | 1.360(8)  |
| C(12)-H(12B) | 0.9900   | C(23)-C(24)  | 1.391(9)  |
| C(13)-C(14)  | 1.517(9) | C(23)-C(28)  | 1.391(8)  |
| C(13)-H(13A) | 0.9900   | C(24)-C(25)  | 1.388(9)  |
| C(13)-H(13B) | 0.9900   | C(24)-H(24)  | 0.9500    |
| C(14)-C(19)  | 1.537(9) | C(25)-C(26)  | 1.394(8)  |
| C(14)-C(15)  | 1.540(8) | C(25)-H(25)  | 0.9500    |
| C(14)-C(18)  | 1.580(9) | C(26)-C(27)  | 1.414(8)  |
| C(15)-C(16)  | 1.541(9) | C(26)-C(29)  | 1.531(8)  |
| C(15)-H(15)  | 1.0000   | C(27)-C(28)  | 1.398(9)  |
| C(16)-C(17)  | 1.550(9) | C(27)-C(32)  | 1.504(8)  |
| C(16)-H(16A) | 0.9900   | C(28)-H(28)  | 0.9500    |
| C(16)-H(16B) | 0.9900   | C(29)-C(33)  | 1.535(8)  |
| C(17)-C(18)  | 1.546(9) | C(29)-C(30)  | 1.539(8)  |
| C(17)-H(17A) | 0.9900   | C(29)-H(29)  | 1.0000    |

|              |           |                  |           |
|--------------|-----------|------------------|-----------|
| C(30)-C(31)  | 1.518(9)  | C(40)-H(40A)     | 0.9800    |
| C(30)-C(36)  | 1.524(8)  | C(40)-H(40B)     | 0.9800    |
| C(30)-H(30)  | 1.0000    | C(40)-H(40C)     | 0.9800    |
| C(31)-C(32)  | 1.529(9)  | C(41)-C(42)      | 1.179(10) |
| C(31)-H(31A) | 0.9900    | C(42)-H(42)      | 0.9500    |
| C(31)-H(31B) | 0.9900    | O(2)-H(2)        | 0.8400    |
| C(32)-H(32A) | 0.9900    | O(3)-H(3)        | 0.8400    |
| C(32)-H(32B) | 0.9900    | O(1)-C(1)-H(1A)  | 109.5     |
| C(33)-C(34)  | 1.541(9)  | O(1)-C(1)-H(1B)  | 109.5     |
| C(33)-H(33A) | 0.9900    | H(1A)-C(1)-H(1B) | 109.5     |
| C(33)-H(33B) | 0.9900    | O(1)-C(1)-H(1C)  | 109.5     |
| C(34)-C(35)  | 1.542(8)  | H(1A)-C(1)-H(1C) | 109.5     |
| C(34)-H(34A) | 0.9900    | H(1B)-C(1)-H(1C) | 109.5     |
| C(34)-H(34B) | 0.9900    | O(1)-C(2)-C(3)   | 115.8(5)  |
| C(35)-C(36)  | 1.540(9)  | O(1)-C(2)-C(7)   | 125.0(6)  |
| C(35)-C(40)  | 1.543(9)  | C(3)-C(2)-C(7)   | 119.1(6)  |
| C(35)-C(39)  | 1.556(9)  | C(4)-C(3)-C(2)   | 119.7(6)  |
| C(36)-C(37)  | 1.535(9)  | C(4)-C(3)-H(3A)  | 120.2     |
| C(36)-H(36)  | 1.0000    | C(2)-C(3)-H(3A)  | 120.2     |
| C(37)-C(38)  | 1.543(10) | C(3)-C(4)-C(5)   | 122.5(6)  |
| C(37)-H(37A) | 0.9900    | C(3)-C(4)-H(4)   | 118.7     |
| C(37)-H(37B) | 0.9900    | C(5)-C(4)-H(4)   | 118.7     |
| C(38)-C(39)  | 1.559(9)  | C(4)-C(5)-C(6)   | 117.3(6)  |
| C(38)-H(38A) | 0.9900    | C(4)-C(5)-C(11)  | 121.6(5)  |
| C(38)-H(38B) | 0.9900    | C(6)-C(5)-C(11)  | 121.2(5)  |
| C(39)-O(3)   | 1.451(8)  | C(7)-C(6)-C(5)   | 120.5(5)  |
| C(39)-C(41)  | 1.474(9)  | C(7)-C(6)-C(8)   | 117.3(5)  |

|                   |          |                     |          |
|-------------------|----------|---------------------|----------|
| C(5)-C(6)-C(8)    | 122.3(6) | C(10)-C(11)-H(11)   | 107.1    |
| C(2)-C(7)-C(6)    | 120.9(6) | C(11)-C(12)-C(13)   | 112.5(5) |
| C(2)-C(7)-H(7)    | 119.6    | C(11)-C(12)-H(12A)  | 109.1    |
| C(6)-C(7)-H(7)    | 119.6    | C(13)-C(12)-H(12A)  | 109.1    |
| C(9)-C(8)-C(6)    | 113.2(5) | C(11)-C(12)-H(12B)  | 109.1    |
| C(9)-C(8)-H(8A)   | 108.9    | C(13)-C(12)-H(12B)  | 109.1    |
| C(6)-C(8)-H(8A)   | 108.9    | H(12A)-C(12)-H(12B) | 107.8    |
| C(9)-C(8)-H(8B)   | 108.9    | C(14)-C(13)-C(12)   | 110.1(5) |
| C(6)-C(8)-H(8B)   | 108.9    | C(14)-C(13)-H(13A)  | 109.6    |
| H(8A)-C(8)-H(8B)  | 107.8    | C(12)-C(13)-H(13A)  | 109.6    |
| C(8)-C(9)-C(10)   | 110.6(5) | C(14)-C(13)-H(13B)  | 109.6    |
| C(8)-C(9)-H(9A)   | 109.5    | C(12)-C(13)-H(13B)  | 109.6    |
| C(10)-C(9)-H(9A)  | 109.5    | H(13A)-C(13)-H(13B) | 108.2    |
| C(8)-C(9)-H(9B)   | 109.5    | C(13)-C(14)-C(19)   | 110.9(5) |
| C(10)-C(9)-H(9B)  | 109.5    | C(13)-C(14)-C(15)   | 109.2(5) |
| H(9A)-C(9)-H(9B)  | 108.1    | C(19)-C(14)-C(15)   | 113.5(5) |
| C(15)-C(10)-C(9)  | 113.2(5) | C(13)-C(14)-C(18)   | 116.4(5) |
| C(15)-C(10)-C(11) | 108.5(5) | C(19)-C(14)-C(18)   | 107.2(5) |
| C(9)-C(10)-C(11)  | 108.3(5) | C(15)-C(14)-C(18)   | 99.3(5)  |
| C(15)-C(10)-H(10) | 109.0    | C(10)-C(15)-C(14)   | 112.1(5) |
| C(9)-C(10)-H(10)  | 109.0    | C(10)-C(15)-C(16)   | 119.4(5) |
| C(11)-C(10)-H(10) | 109.0    | C(14)-C(15)-C(16)   | 104.2(5) |
| C(5)-C(11)-C(12)  | 114.0(5) | C(10)-C(15)-H(15)   | 106.9    |
| C(5)-C(11)-C(10)  | 110.4(5) | C(14)-C(15)-H(15)   | 106.9    |
| C(12)-C(11)-C(10) | 110.7(5) | C(16)-C(15)-H(15)   | 106.9    |
| C(5)-C(11)-H(11)  | 107.1    | C(15)-C(16)-C(17)   | 104.7(5) |
| C(12)-C(11)-H(11) | 107.1    | C(15)-C(16)-H(16A)  | 110.8    |



|                     |          |                     |          |
|---------------------|----------|---------------------|----------|
| C(17)-C(16)-H(16A)  | 110.8    | O(4)-C(22)-H(22C)   | 109.5    |
| C(15)-C(16)-H(16B)  | 110.8    | H(22A)-C(22)-H(22C) | 109.5    |
| C(17)-C(16)-H(16B)  | 110.8    | H(22B)-C(22)-H(22C) | 109.5    |
| H(16A)-C(16)-H(16B) | 108.9    | O(4)-C(23)-C(24)    | 117.4(5) |
| C(18)-C(17)-C(16)   | 106.4(5) | O(4)-C(23)-C(28)    | 124.2(6) |
| C(18)-C(17)-H(17A)  | 110.4    | C(24)-C(23)-C(28)   | 118.5(6) |
| C(16)-C(17)-H(17A)  | 110.4    | C(25)-C(24)-C(23)   | 120.3(5) |
| C(18)-C(17)-H(17B)  | 110.4    | C(25)-C(24)-H(24)   | 119.9    |
| C(16)-C(17)-H(17B)  | 110.4    | C(23)-C(24)-H(24)   | 119.9    |
| H(17A)-C(17)-H(17B) | 108.6    | C(24)-C(25)-C(26)   | 121.8(5) |
| O(2)-C(18)-C(20)    | 110.4(6) | C(24)-C(25)-H(25)   | 119.1    |
| O(2)-C(18)-C(17)    | 110.6(5) | C(26)-C(25)-H(25)   | 119.1    |
| C(20)-C(18)-C(17)   | 108.6(5) | C(25)-C(26)-C(27)   | 118.2(5) |
| O(2)-C(18)-C(14)    | 114.0(5) | C(25)-C(26)-C(29)   | 122.2(5) |
| C(20)-C(18)-C(14)   | 111.1(5) | C(27)-C(26)-C(29)   | 119.6(5) |
| C(17)-C(18)-C(14)   | 101.7(5) | C(28)-C(27)-C(26)   | 119.1(5) |
| C(14)-C(19)-H(19A)  | 109.5    | C(28)-C(27)-C(32)   | 117.7(5) |
| C(14)-C(19)-H(19B)  | 109.5    | C(26)-C(27)-C(32)   | 123.1(5) |
| H(19A)-C(19)-H(19B) | 109.5    | C(23)-C(28)-C(27)   | 122.0(6) |
| C(14)-C(19)-H(19C)  | 109.5    | C(23)-C(28)-H(28)   | 119.0    |
| H(19A)-C(19)-H(19C) | 109.5    | C(27)-C(28)-H(28)   | 119.0    |
| H(19B)-C(19)-H(19C) | 109.5    | C(26)-C(29)-C(33)   | 112.8(5) |
| C(21)-C(20)-C(18)   | 176.3(7) | C(26)-C(29)-C(30)   | 111.3(5) |
| C(20)-C(21)-H(21)   | 180.0    | C(33)-C(29)-C(30)   | 111.7(5) |
| O(4)-C(22)-H(22A)   | 109.5    | C(26)-C(29)-H(29)   | 106.9    |
| O(4)-C(22)-H(22B)   | 109.5    | C(33)-C(29)-H(29)   | 106.9    |
| H(22A)-C(22)-H(22B) | 109.5    | C(30)-C(29)-H(29)   | 106.9    |

|                     |          |                     |          |
|---------------------|----------|---------------------|----------|
| C(31)-C(30)-C(36)   | 113.0(5) | C(33)-C(34)-H(34B)  | 109.6    |
| C(31)-C(30)-C(29)   | 109.5(5) | C(35)-C(34)-H(34B)  | 109.6    |
| C(36)-C(30)-C(29)   | 108.1(5) | H(34A)-C(34)-H(34B) | 108.1    |
| C(31)-C(30)-H(30)   | 108.7    | C(36)-C(35)-C(34)   | 108.9(5) |
| C(36)-C(30)-H(30)   | 108.7    | C(36)-C(35)-C(40)   | 114.2(5) |
| C(29)-C(30)-H(30)   | 108.7    | C(34)-C(35)-C(40)   | 109.2(6) |
| C(30)-C(31)-C(32)   | 109.8(5) | C(36)-C(35)-C(39)   | 99.1(5)  |
| C(30)-C(31)-H(31A)  | 109.7    | C(34)-C(35)-C(39)   | 116.6(5) |
| C(32)-C(31)-H(31A)  | 109.7    | C(40)-C(35)-C(39)   | 108.7(5) |
| C(30)-C(31)-H(31B)  | 109.7    | C(30)-C(36)-C(37)   | 119.0(5) |
| C(32)-C(31)-H(31B)  | 109.7    | C(30)-C(36)-C(35)   | 113.4(5) |
| H(31A)-C(31)-H(31B) | 108.2    | C(37)-C(36)-C(35)   | 103.7(5) |
| C(27)-C(32)-C(31)   | 113.7(5) | C(30)-C(36)-H(36)   | 106.7    |
| C(27)-C(32)-H(32A)  | 108.8    | C(37)-C(36)-H(36)   | 106.7    |
| C(31)-C(32)-H(32A)  | 108.8    | C(35)-C(36)-H(36)   | 106.7    |
| C(27)-C(32)-H(32B)  | 108.8    | C(36)-C(37)-C(38)   | 104.9(5) |
| C(31)-C(32)-H(32B)  | 108.8    | C(36)-C(37)-H(37A)  | 110.8    |
| H(32A)-C(32)-H(32B) | 107.7    | C(38)-C(37)-H(37A)  | 110.8    |
| C(29)-C(33)-C(34)   | 112.8(5) | C(36)-C(37)-H(37B)  | 110.8    |
| C(29)-C(33)-H(33A)  | 109.0    | C(38)-C(37)-H(37B)  | 110.8    |
| C(34)-C(33)-H(33A)  | 109.0    | H(37A)-C(37)-H(37B) | 108.8    |
| C(29)-C(33)-H(33B)  | 109.0    | C(37)-C(38)-C(39)   | 105.5(5) |
| C(34)-C(33)-H(33B)  | 109.0    | C(37)-C(38)-H(38A)  | 110.6    |
| H(33A)-C(33)-H(33B) | 107.8    | C(39)-C(38)-H(38A)  | 110.6    |
| C(33)-C(34)-C(35)   | 110.3(5) | C(37)-C(38)-H(38B)  | 110.6    |
| C(33)-C(34)-H(34A)  | 109.6    | C(39)-C(38)-H(38B)  | 110.6    |
| C(35)-C(34)-H(34A)  | 109.6    | H(38A)-C(38)-H(38B) | 108.8    |

|                     |          |                     |          |
|---------------------|----------|---------------------|----------|
| O(3)-C(39)-C(41)    | 109.0(5) | C(35)-C(40)-H(40C)  | 109.5    |
| O(3)-C(39)-C(35)    | 115.4(6) | H(40A)-C(40)-H(40C) | 109.5    |
| C(41)-C(39)-C(35)   | 112.5(5) | H(40B)-C(40)-H(40C) | 109.5    |
| O(3)-C(39)-C(38)    | 108.4(5) | C(42)-C(41)-C(39)   | 178.4(8) |
| C(41)-C(39)-C(38)   | 109.1(6) | C(41)-C(42)-H(42)   | 180.0    |
| C(35)-C(39)-C(38)   | 102.1(5) | C(2)-O(1)-C(1)      | 116.4(5) |
| C(35)-C(40)-H(40A)  | 109.5    | C(18)-O(2)-H(2)     | 109.5    |
| C(35)-C(40)-H(40B)  | 109.5    | C(39)-O(3)-H(3)     | 109.5    |
| H(40A)-C(40)-H(40B) | 109.5    | C(23)-O(4)-C(22)    | 117.8(5) |

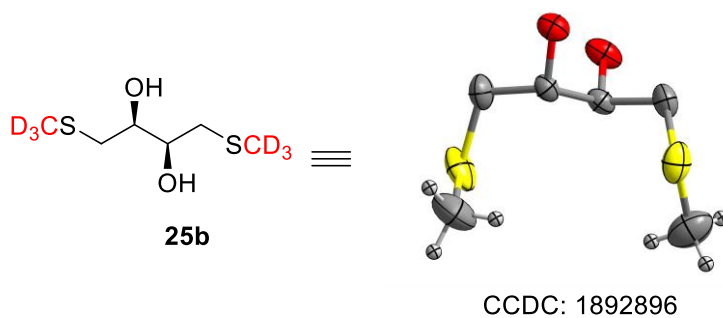

Crystal data and structure refinement:

|                      |                                                                                                    |
|----------------------|----------------------------------------------------------------------------------------------------|
| Empirical formula    | C <sub>6</sub> H <sub>14</sub> N <sub>0</sub> O <sub>2</sub> S <sub>2</sub>                        |
| Formula weight       | 182.29                                                                                             |
| Temperature          | 293(2) K                                                                                           |
| Wavelength           | 0.71073 Å                                                                                          |
| Crystal system       | Monoclinic                                                                                         |
| Space group          | P2 <sub>1</sub> /c                                                                                 |
| Unit cell dimensions | a = 11.659(3) Å    α = 90°.<br>b = 4.9631(11) Å    β = 103.359(3)°.<br>c = 16.709(4) Å    γ = 90°. |
| Volume               | 940.7(4) Å <sup>3</sup>                                                                            |
| Z                    | 4                                                                                                  |

|                                   |                                             |
|-----------------------------------|---------------------------------------------|
| Density (calculated)              | 1.287 Mg/m <sup>3</sup>                     |
| Absorption coefficient            | 0.513 mm <sup>-1</sup>                      |
| F(000)                            | 392                                         |
| Crystal size                      | 0.220 x 0.180 x 0.170 mm <sup>3</sup>       |
| Theta range for data collection   | 2.506 to 25.010°.                           |
| Index ranges                      | -13<=h<=13, -5<=k<=3, -19<=l<=19            |
| Reflections collected             | 5663                                        |
| Independent reflections           | 1641 [R(int) = 0.0622]                      |
| Completeness to theta = 25.010°   | 99.3 %                                      |
| Refinement method                 | Full-matrix least-squares on F <sup>2</sup> |
| Data / restraints / parameters    | 1641 / 0 / 95                               |
| Goodness-of-fit on F <sup>2</sup> | 1.033                                       |
| Final R indices [I>2sigma(I)]     | R1 = 0.0503, wR2 = 0.1375                   |
| R indices (all data)              | R1 = 0.0550, wR2 = 0.1436                   |
| Extinction coefficient            | n/a                                         |
| Largest diff. peak and hole       | 0.345 and -0.479 e.Å <sup>-3</sup>          |

Bond lengths [Å] and angles [°]:

|             |          |            |          |
|-------------|----------|------------|----------|
| S(1)-C(1)   | 1.784(3) | C(4)-H(4)  | 0.9800   |
| S(1)-C(2)   | 1.799(3) | C(3)-C(2)  | 1.520(3) |
| S(2)-C(6)   | 1.781(4) | C(3)-H(3)  | 0.9800   |
| S(2)-C(5)   | 1.799(3) | C(2)-H(2A) | 0.9700   |
| O(1)-C(4)   | 1.430(3) | C(2)-H(2B) | 0.9700   |
| O(1)-H(003) | 0.8200   | C(5)-H(5A) | 0.9700   |
| O(2)-C(3)   | 1.425(2) | C(5)-H(5B) | 0.9700   |
| O(2)-H(004) | 0.8200   | C(1)-H(1A) | 0.9600   |
| C(4)-C(5)   | 1.518(3) | C(1)-H(1B) | 0.9600   |
| C(4)-C(3)   | 1.520(3) | C(1)-H(1C) | 0.9600   |

|                  |            |                  |            |
|------------------|------------|------------------|------------|
| C(6)-H(6A)       | 0.9600     | C(3)-C(2)-H(2B)  | 108.6      |
| C(6)-H(6B)       | 0.9600     | S(1)-C(2)-H(2B)  | 108.6      |
| C(6)-H(6C)       | 0.9600     | H(2A)-C(2)-H(2B) | 107.6      |
| C(1)-S(1)-C(2)   | 100.92(14) | C(4)-C(5)-S(2)   | 114.97(17) |
| C(6)-S(2)-C(5)   | 100.18(14) | C(4)-C(5)-H(5A)  | 108.5      |
| C(4)-O(1)-H(003) | 109.5      | S(2)-C(5)-H(5A)  | 108.5      |
| C(3)-O(2)-H(004) | 109.5      | C(4)-C(5)-H(5B)  | 108.5      |
| O(1)-C(4)-C(5)   | 108.51(18) | S(2)-C(5)-H(5B)  | 108.5      |
| O(1)-C(4)-C(3)   | 111.07(16) | H(5A)-C(5)-H(5B) | 107.5      |
| C(5)-C(4)-C(3)   | 113.77(19) | S(1)-C(1)-H(1A)  | 109.5      |
| O(1)-C(4)-H(4)   | 107.8      | S(1)-C(1)-H(1B)  | 109.5      |
| C(5)-C(4)-H(4)   | 107.8      | H(1A)-C(1)-H(1B) | 109.5      |
| C(3)-C(4)-H(4)   | 107.8      | S(1)-C(1)-H(1C)  | 109.5      |
| O(2)-C(3)-C(4)   | 110.14(17) | H(1A)-C(1)-H(1C) | 109.5      |
| O(2)-C(3)-C(2)   | 105.87(16) | H(1B)-C(1)-H(1C) | 109.5      |
| C(4)-C(3)-C(2)   | 112.77(19) | S(2)-C(6)-H(6A)  | 109.5      |
| O(2)-C(3)-H(3)   | 109.3      | S(2)-C(6)-H(6B)  | 109.5      |
| C(4)-C(3)-H(3)   | 109.3      | H(6A)-C(6)-H(6B) | 109.5      |
| C(2)-C(3)-H(3)   | 109.3      | S(2)-C(6)-H(6C)  | 109.5      |
| C(3)-C(2)-S(1)   | 114.64(14) | H(6A)-C(6)-H(6C) | 109.5      |
| C(3)-C(2)-H(2A)  | 108.6      | H(6B)-C(6)-H(6C) | 109.5      |
| S(1)-C(2)-H(2A)  | 108.6      |                  |            |

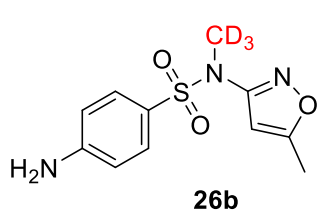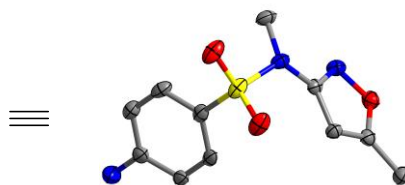

CCDC: 1892898

Crystal data and structure refinement:

|                                   |                                                                                                      |
|-----------------------------------|------------------------------------------------------------------------------------------------------|
| Empirical formula                 | C11 H13 N3 O3 S                                                                                      |
| Formula weight                    | 267.30                                                                                               |
| Temperature                       | 173(2) K                                                                                             |
| Wavelength                        | 1.54178 Å                                                                                            |
| Crystal system                    | Hexagonal                                                                                            |
| Space group                       | P6 <sub>1</sub>                                                                                      |
| Unit cell dimensions              | a = 10.2409(9) Å      α = 90°.<br>b = 10.2409(9) Å      β = 90°.<br>c = 19.9884(18) Å      γ = 120°. |
| Volume                            | 1815.5(4) Å <sup>3</sup>                                                                             |
| Z                                 | 6                                                                                                    |
| Density (calculated)              | 1.467 Mg/m <sup>3</sup>                                                                              |
| Absorption coefficient            | 2.445 mm <sup>-1</sup>                                                                               |
| F(000)                            | 840                                                                                                  |
| Crystal size                      | 0.190 x 0.170 x 0.160 mm <sup>3</sup>                                                                |
| Theta range for data collection   | 4.986 to 64.762°.                                                                                    |
| Index ranges                      | -11 ≤ h ≤ 12, -11 ≤ k ≤ 11, -21 ≤ l ≤ 23                                                             |
| Reflections collected             | 9406                                                                                                 |
| Independent reflections           | 1864 [R(int) = 0.0297]                                                                               |
| Completeness to theta = 64.762°   | 100.0 %                                                                                              |
| Refinement method                 | Full-matrix least-squares on F <sup>2</sup>                                                          |
| Data / restraints / parameters    | 1864 / 1 / 166                                                                                       |
| Goodness-of-fit on F <sup>2</sup> | 1.097                                                                                                |
| Final R indices [I > 2σ(I)]       | R1 = 0.0264, wR2 = 0.0677                                                                            |
| R indices (all data)              | R1 = 0.0264, wR2 = 0.0677                                                                            |
| Absolute structure parameter      | 0.052(6)                                                                                             |
| Extinction coefficient            | 0.0034(5)                                                                                            |

Largest diff. peak and hole

0.354 and -0.253 e.Å<sup>-3</sup>

Bond lengths [Å] and angles [°]:

|             |          |                  |            |
|-------------|----------|------------------|------------|
| C(1)-C(2)   | 1.485(4) | C(11)-H(11)      | 0.9500     |
| C(1)-H(1A)  | 0.9800   | N(1)-O(1)        | 1.412(3)   |
| C(1)-H(1B)  | 0.9800   | N(2)-S(1)        | 1.668(2)   |
| C(1)-H(1C)  | 0.9800   | N(3)-H(3A)       | 0.8800     |
| C(2)-C(3)   | 1.348(3) | N(3)-H(3B)       | 0.8800     |
| C(2)-O(1)   | 1.351(3) | O(2)-S(1)        | 1.432(2)   |
| C(3)-C(4)   | 1.424(3) | O(3)-S(1)        | 1.4274(18) |
| C(3)-H(3)   | 0.9500   | C(2)-C(1)-H(1A)  | 109.5      |
| C(4)-N(1)   | 1.313(3) | C(2)-C(1)-H(1B)  | 109.5      |
| C(4)-N(2)   | 1.396(3) | H(1A)-C(1)-H(1B) | 109.5      |
| C(5)-C(11)  | 1.376(4) | C(2)-C(1)-H(1C)  | 109.5      |
| C(5)-C(7)   | 1.395(4) | H(1A)-C(1)-H(1C) | 109.5      |
| C(5)-H(5)   | 0.9500   | H(1B)-C(1)-H(1C) | 109.5      |
| C(6)-N(2)   | 1.477(3) | C(3)-C(2)-O(1)   | 110.1(2)   |
| C(6)-H(6A)  | 0.9800   | C(3)-C(2)-C(1)   | 133.9(2)   |
| C(6)-H(6B)  | 0.9800   | O(1)-C(2)-C(1)   | 116.0(2)   |
| C(6)-H(6C)  | 0.9800   | C(2)-C(3)-C(4)   | 104.17(19) |
| C(7)-C(8)   | 1.400(4) | C(2)-C(3)-H(3)   | 127.9      |
| C(7)-S(1)   | 1.741(3) | C(4)-C(3)-H(3)   | 127.9      |
| C(8)-C(9)   | 1.363(4) | N(1)-C(4)-N(2)   | 117.9(2)   |
| C(8)-H(8)   | 0.9500   | N(1)-C(4)-C(3)   | 111.9(2)   |
| C(9)-C(10)  | 1.415(4) | N(2)-C(4)-C(3)   | 130.1(2)   |
| C(9)-H(9)   | 0.9500   | C(11)-C(5)-C(7)  | 120.3(2)   |
| C(10)-N(3)  | 1.354(4) | C(11)-C(5)-H(5)  | 119.8      |
| C(10)-C(11) | 1.411(4) | C(7)-C(5)-H(5)   | 119.8      |

|                  |          |                   |            |
|------------------|----------|-------------------|------------|
| N(2)-C(6)-H(6A)  | 109.5    | C(5)-C(11)-C(10)  | 120.9(2)   |
| N(2)-C(6)-H(6B)  | 109.5    | C(5)-C(11)-H(11)  | 119.5      |
| H(6A)-C(6)-H(6B) | 109.5    | C(10)-C(11)-H(11) | 119.5      |
| N(2)-C(6)-H(6C)  | 109.5    | C(4)-N(1)-O(1)    | 105.04(18) |
| H(6A)-C(6)-H(6C) | 109.5    | C(4)-N(2)-C(6)    | 115.7(2)   |
| H(6B)-C(6)-H(6C) | 109.5    | C(4)-N(2)-S(1)    | 120.23(17) |
| C(5)-C(7)-C(8)   | 119.5(3) | C(6)-N(2)-S(1)    | 115.02(18) |
| C(5)-C(7)-S(1)   | 120.6(2) | C(10)-N(3)-H(3A)  | 120.0      |
| C(8)-C(7)-S(1)   | 119.9(2) | C(10)-N(3)-H(3B)  | 120.0      |
| C(9)-C(8)-C(7)   | 120.3(2) | H(3A)-N(3)-H(3B)  | 120.0      |
| C(9)-C(8)-H(8)   | 119.8    | C(2)-O(1)-N(1)    | 108.74(17) |
| C(7)-C(8)-H(8)   | 119.8    | O(3)-S(1)-O(2)    | 119.37(11) |
| C(8)-C(9)-C(10)  | 121.3(2) | O(3)-S(1)-N(2)    | 106.66(11) |
| C(8)-C(9)-H(9)   | 119.3    | O(2)-S(1)-N(2)    | 104.77(12) |
| C(10)-C(9)-H(9)  | 119.3    | O(3)-S(1)-C(7)    | 109.23(12) |
| N(3)-C(10)-C(11) | 121.2(2) | O(2)-S(1)-C(7)    | 108.48(12) |
| N(3)-C(10)-C(9)  | 121.2(2) | N(2)-S(1)-C(7)    | 107.72(11) |
| C(11)-C(10)-C(9) | 117.6(2) |                   |            |



# Section S10. $^1\text{H}$ , $^{13}\text{C}$ , $^{19}\text{F}$ NMR spectra of the products

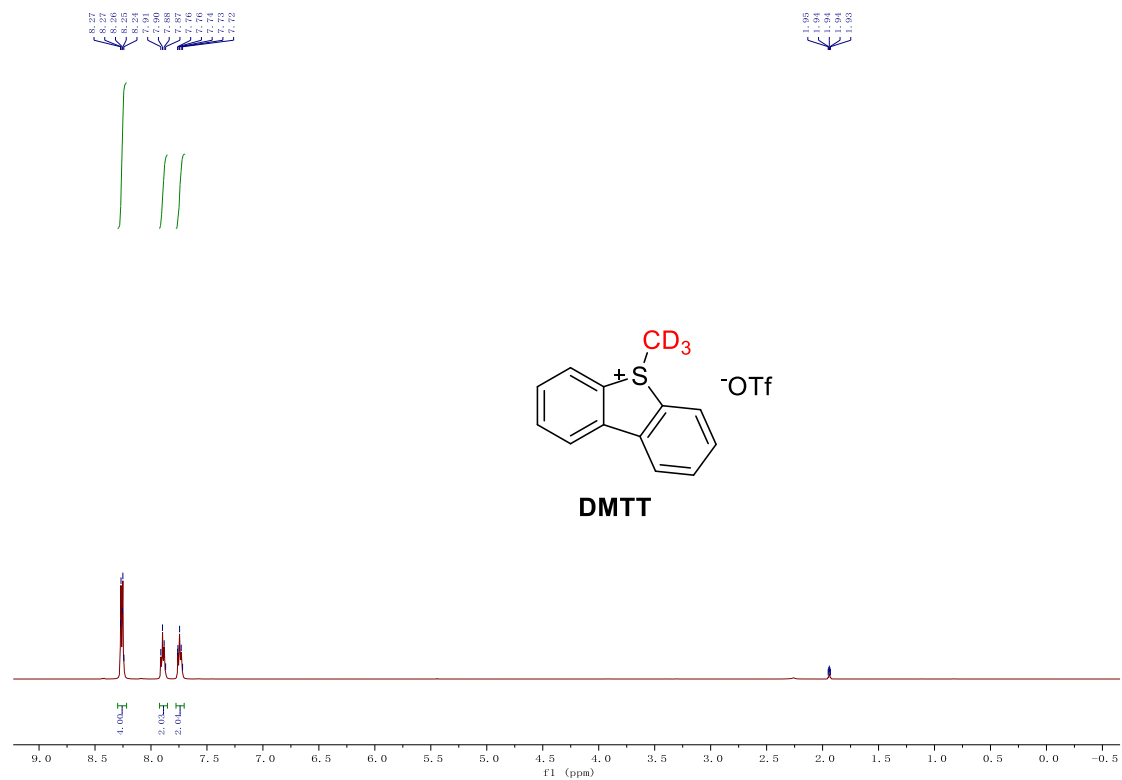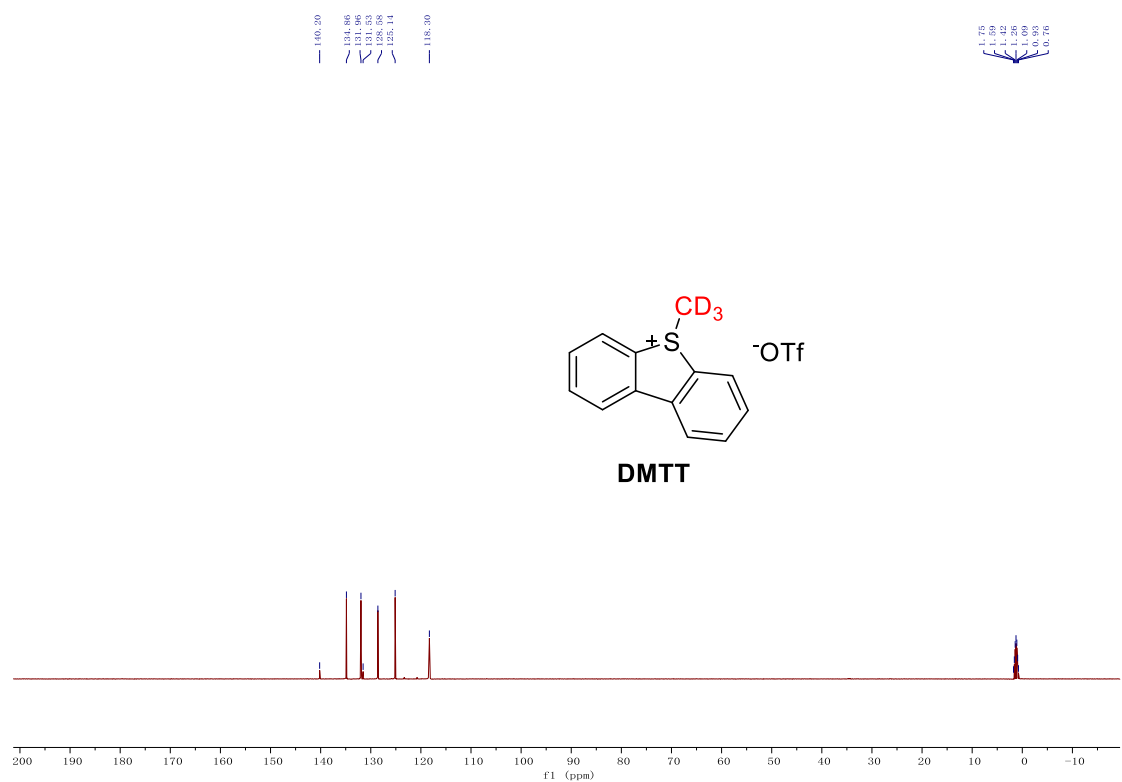

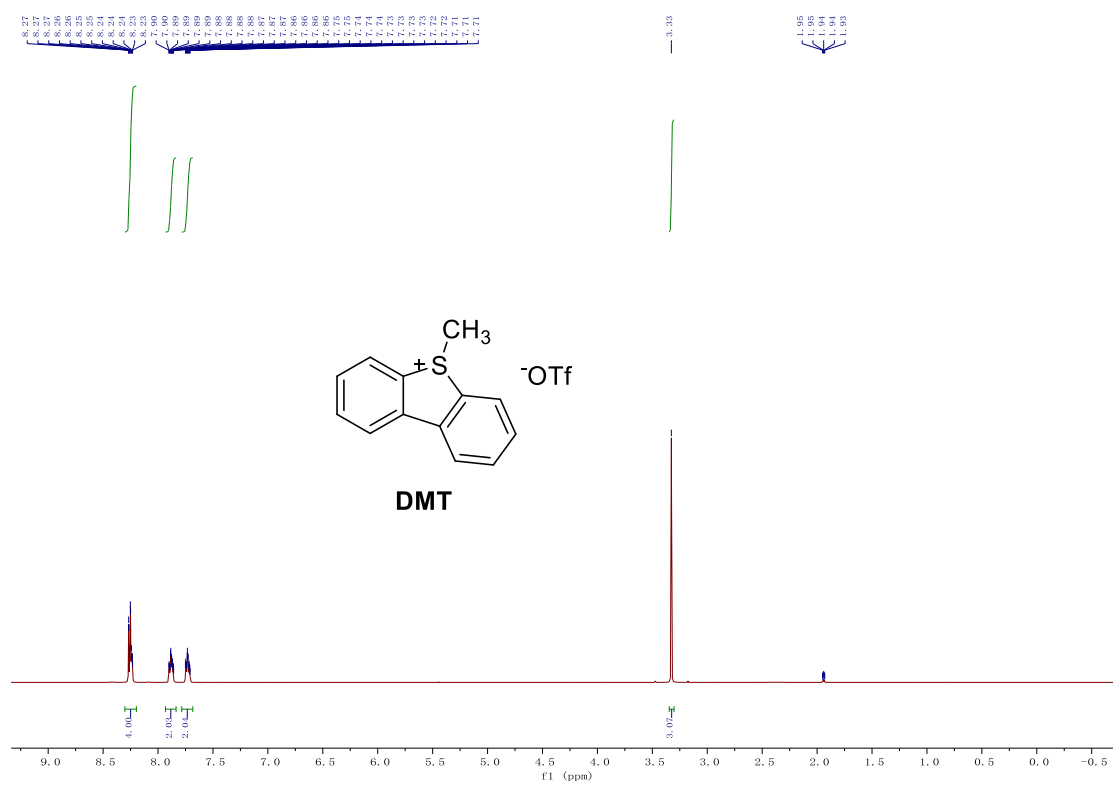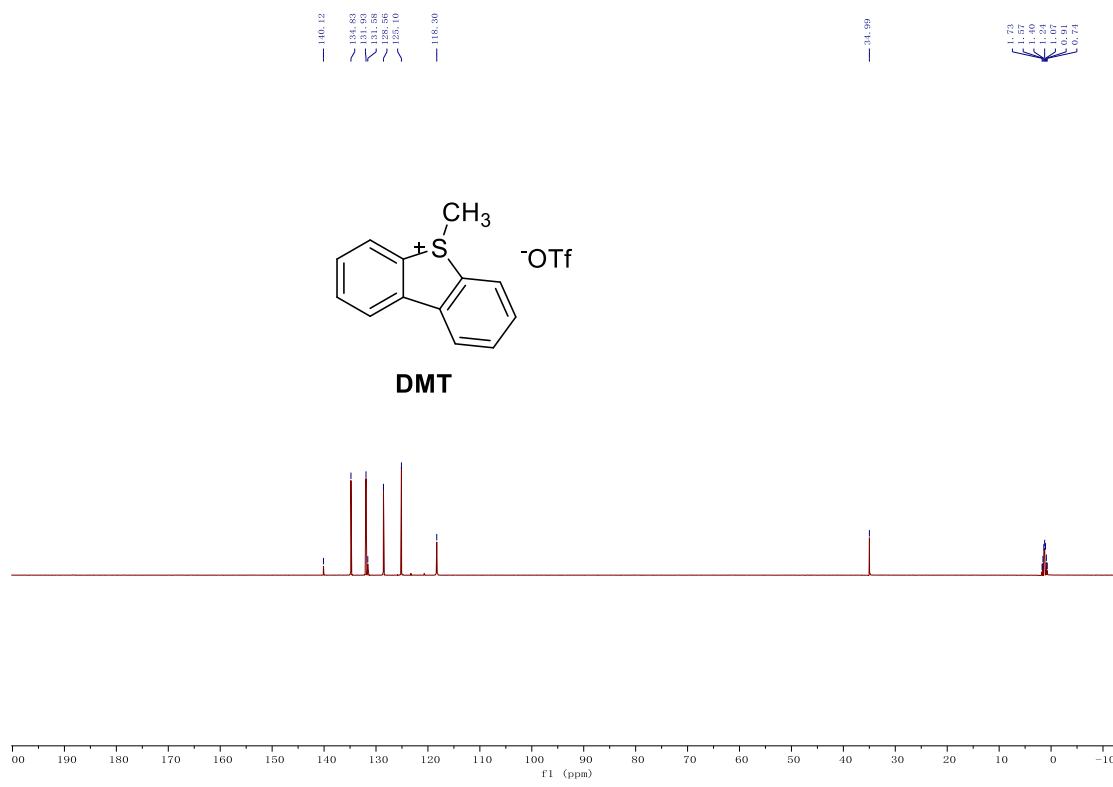

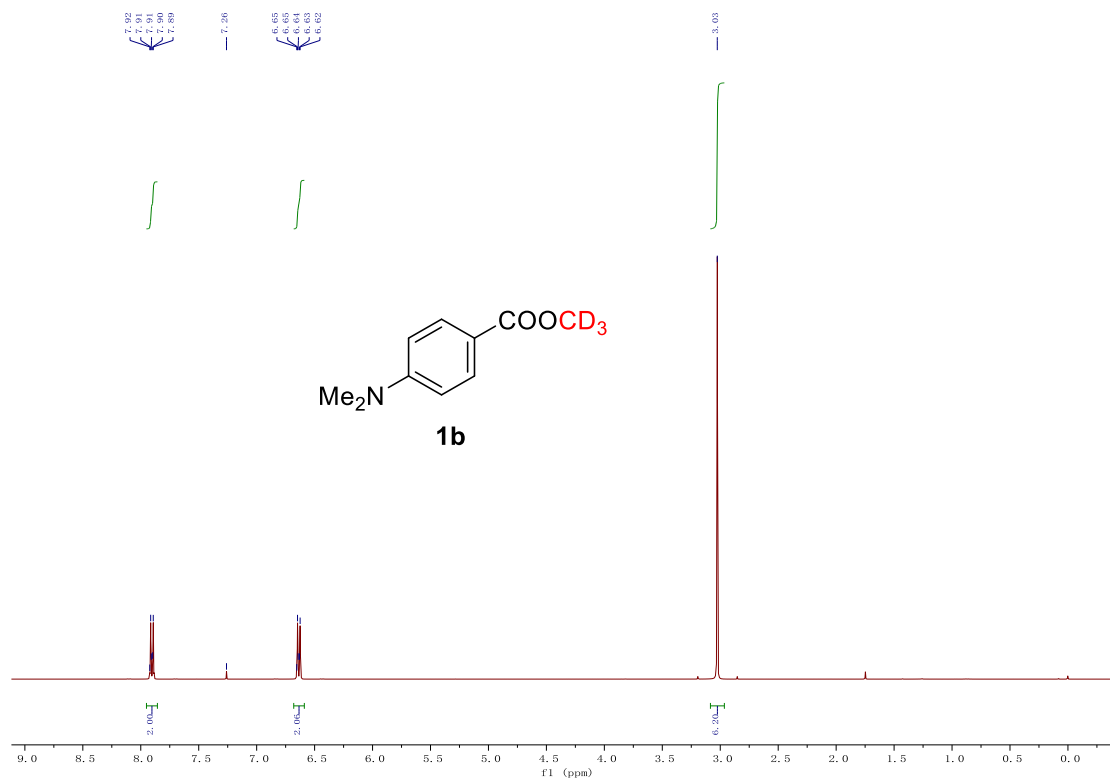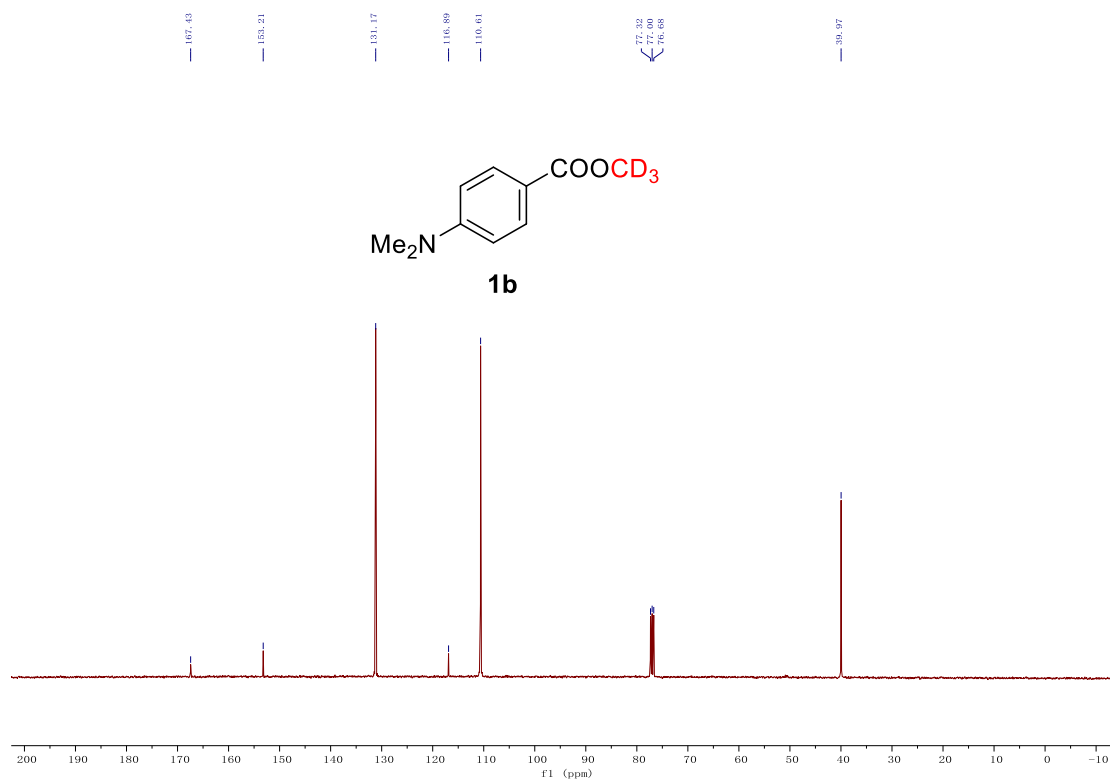

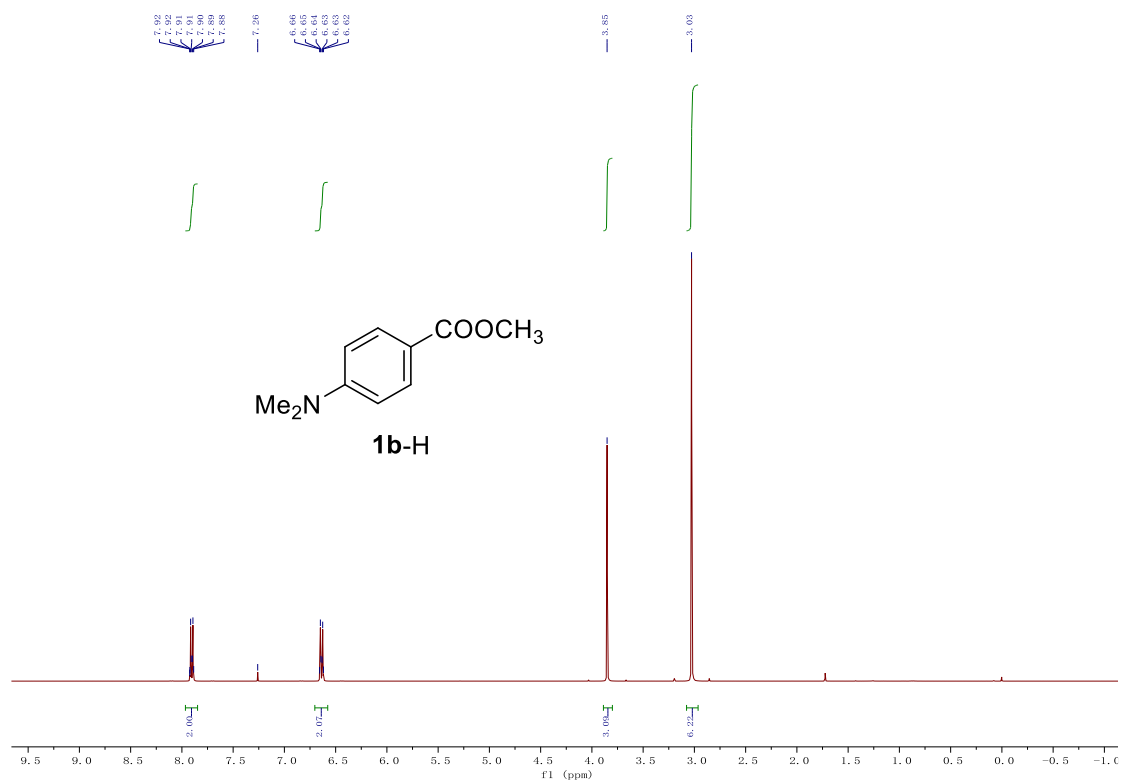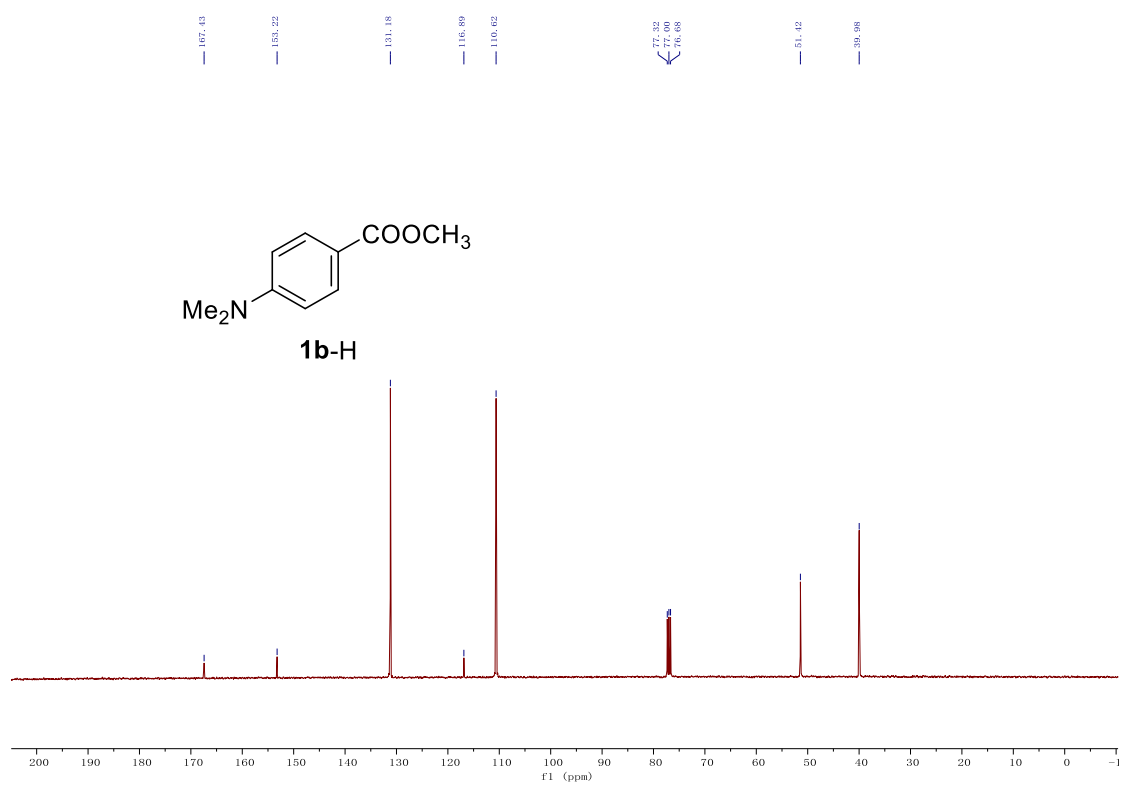

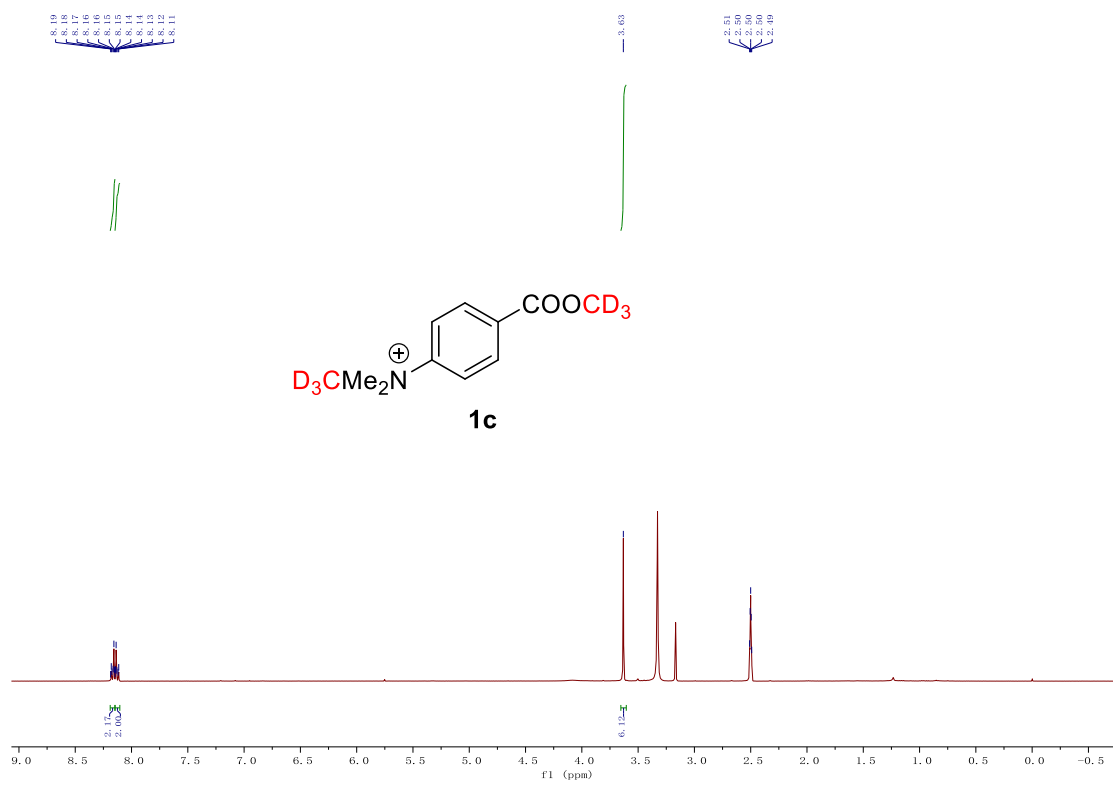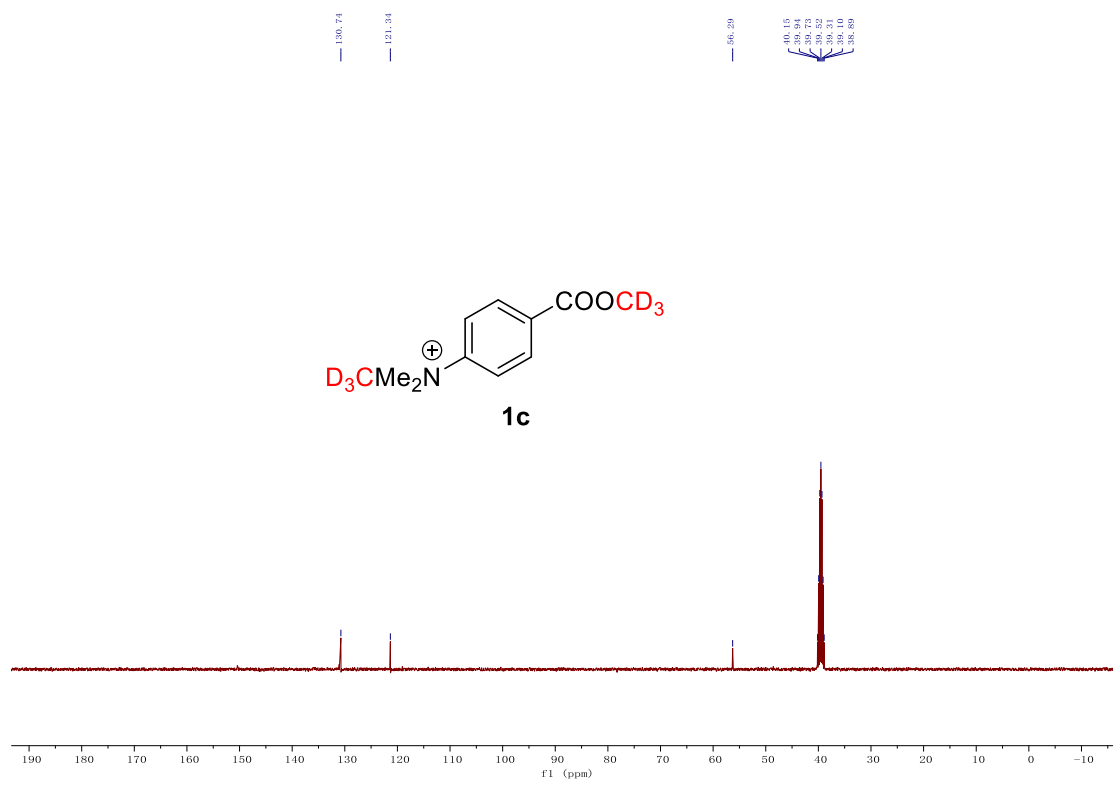

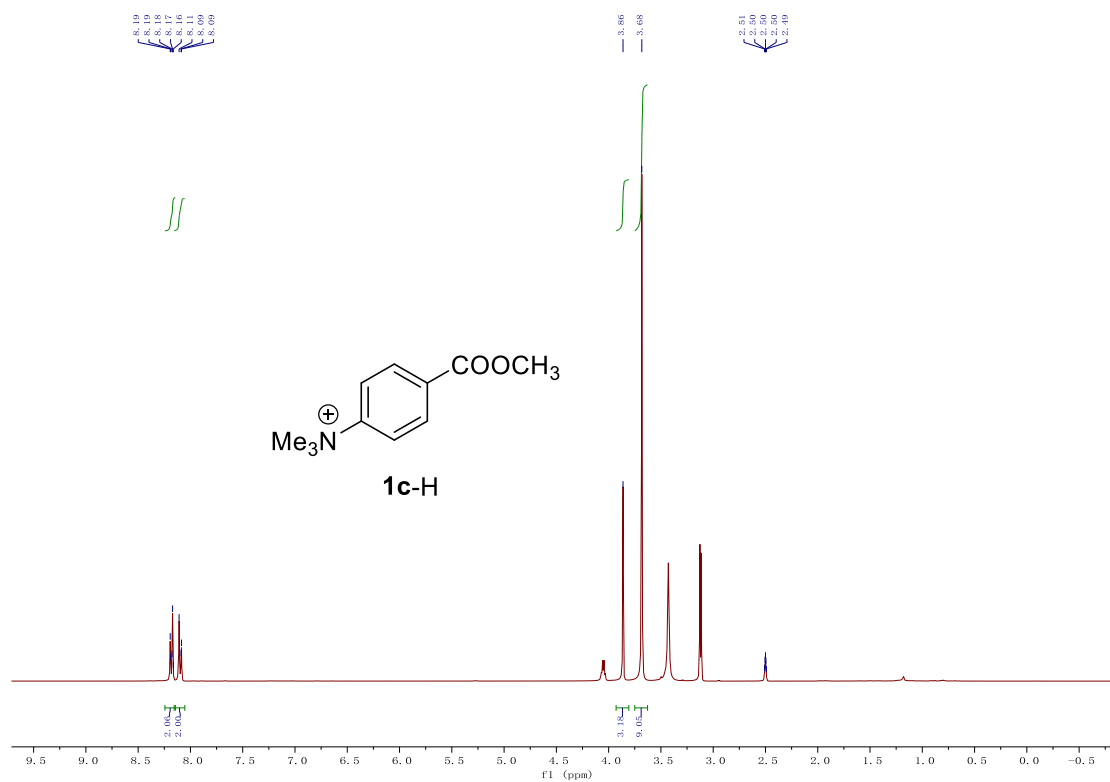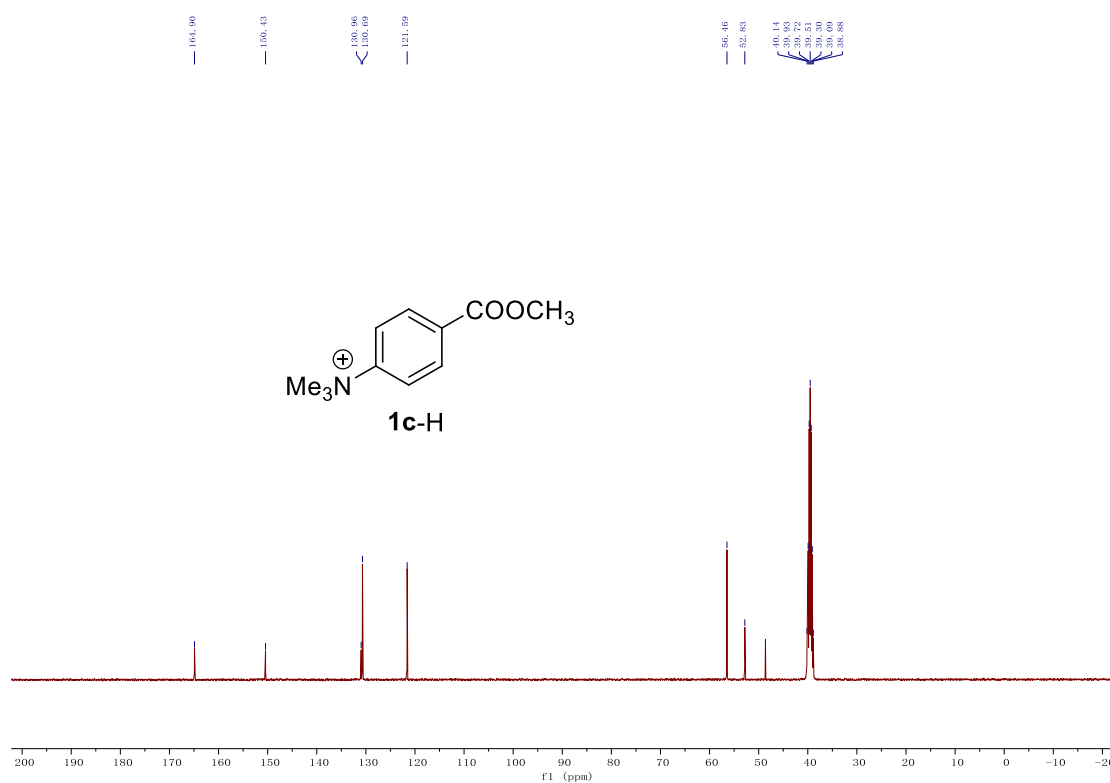

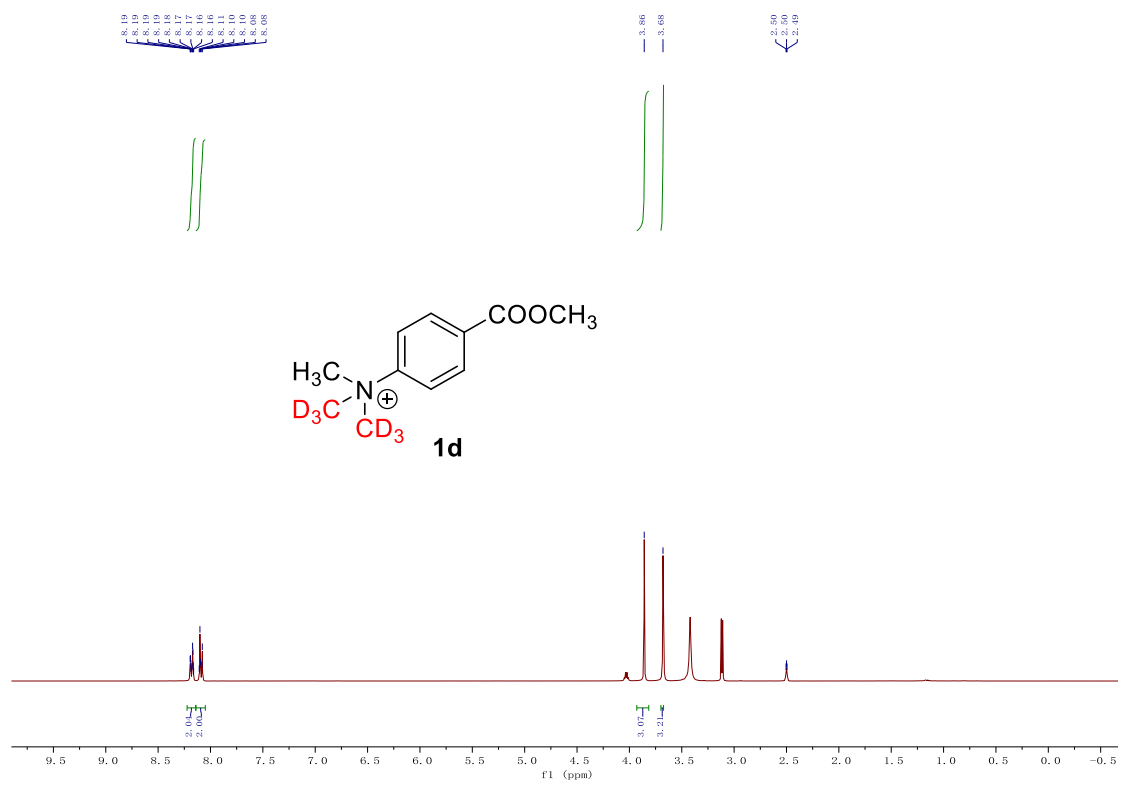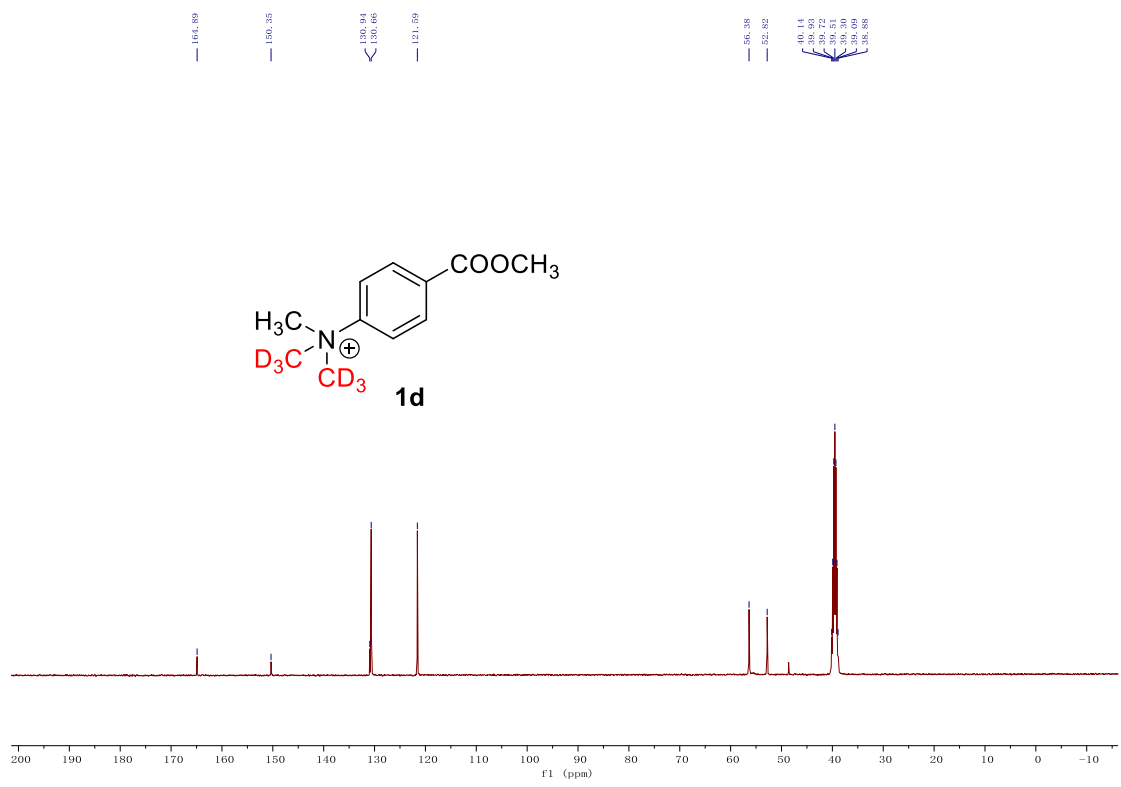

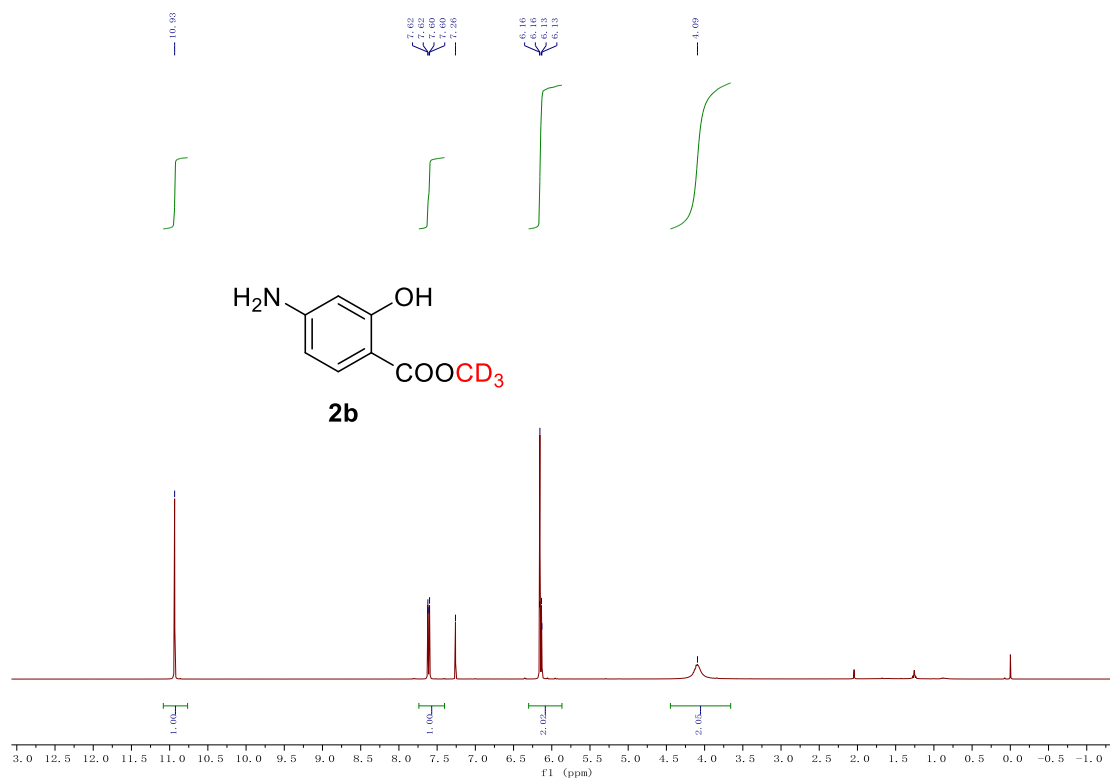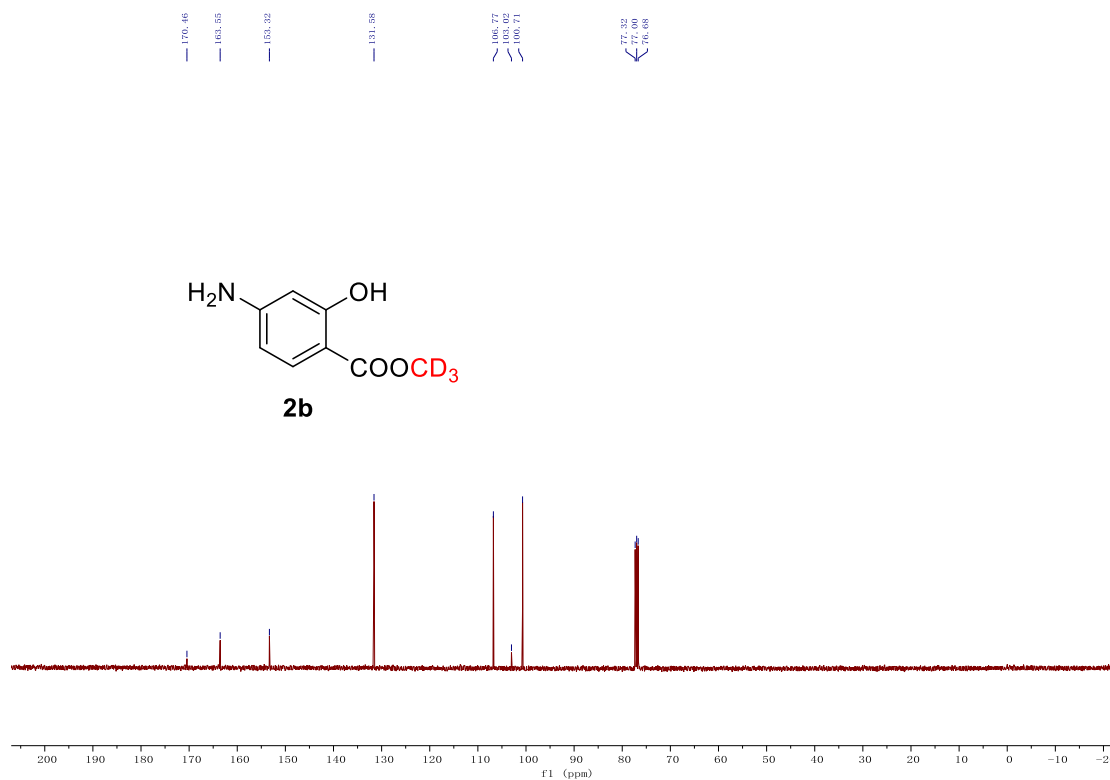



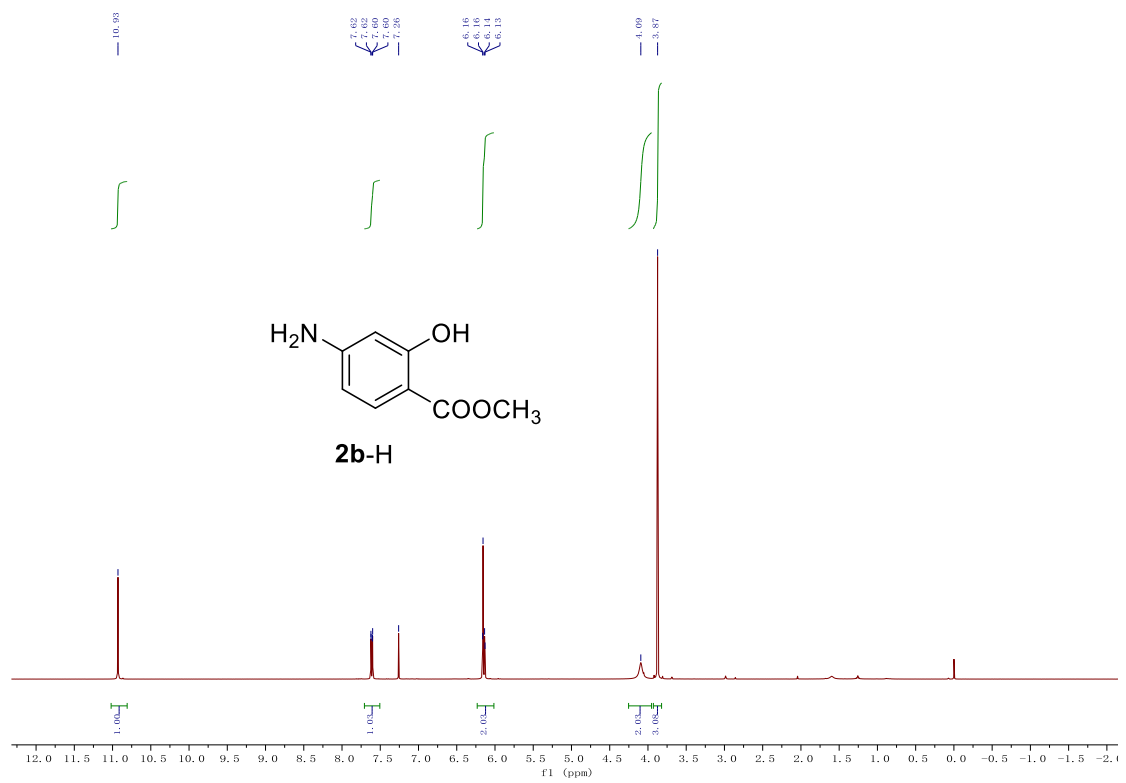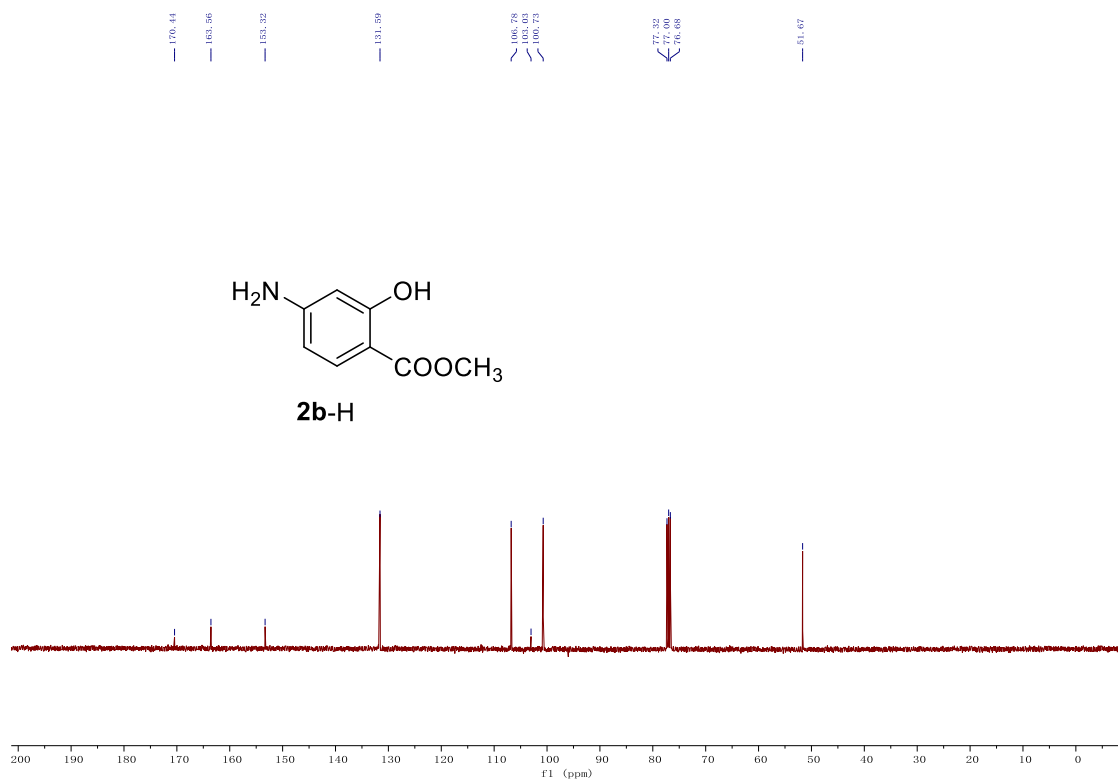

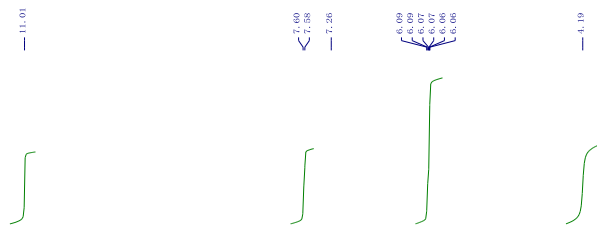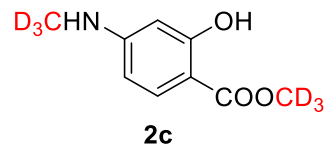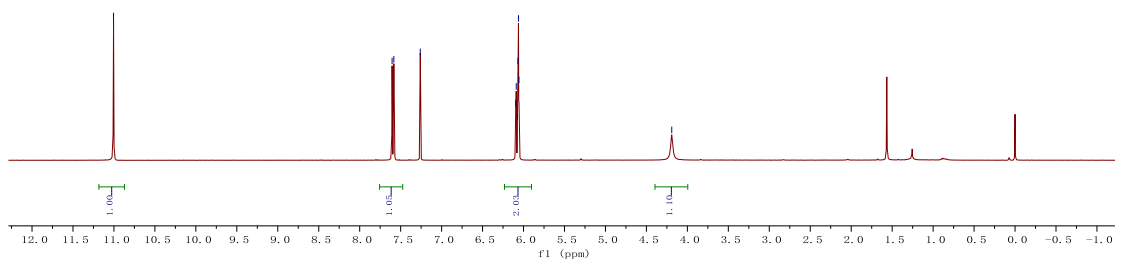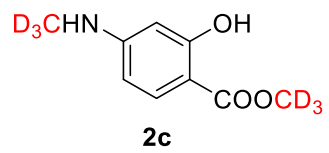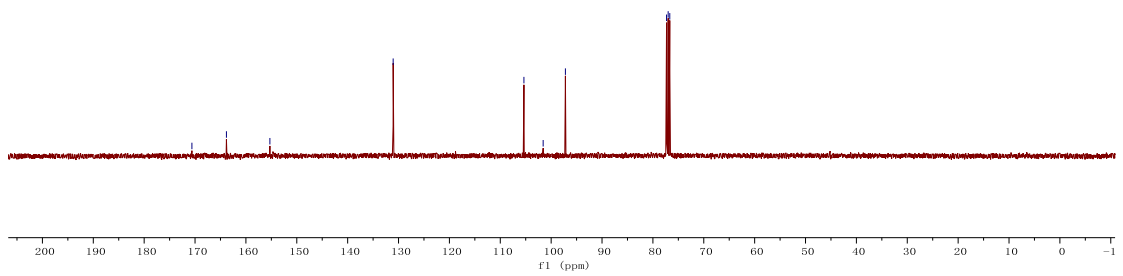

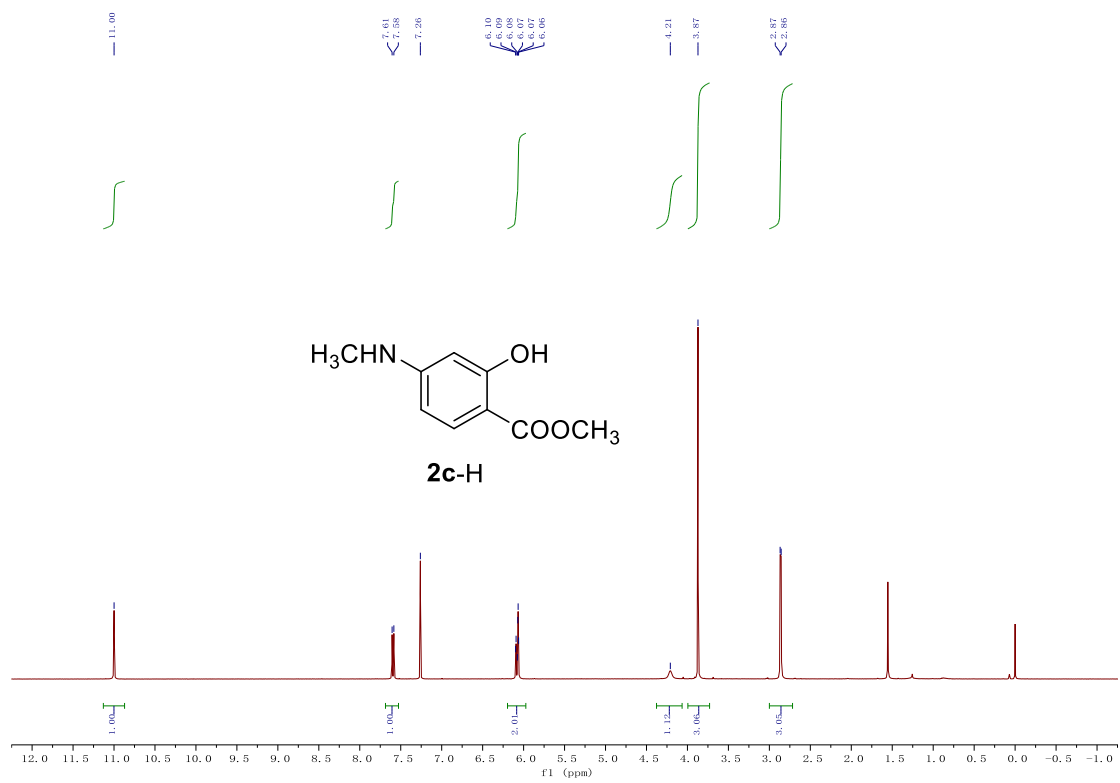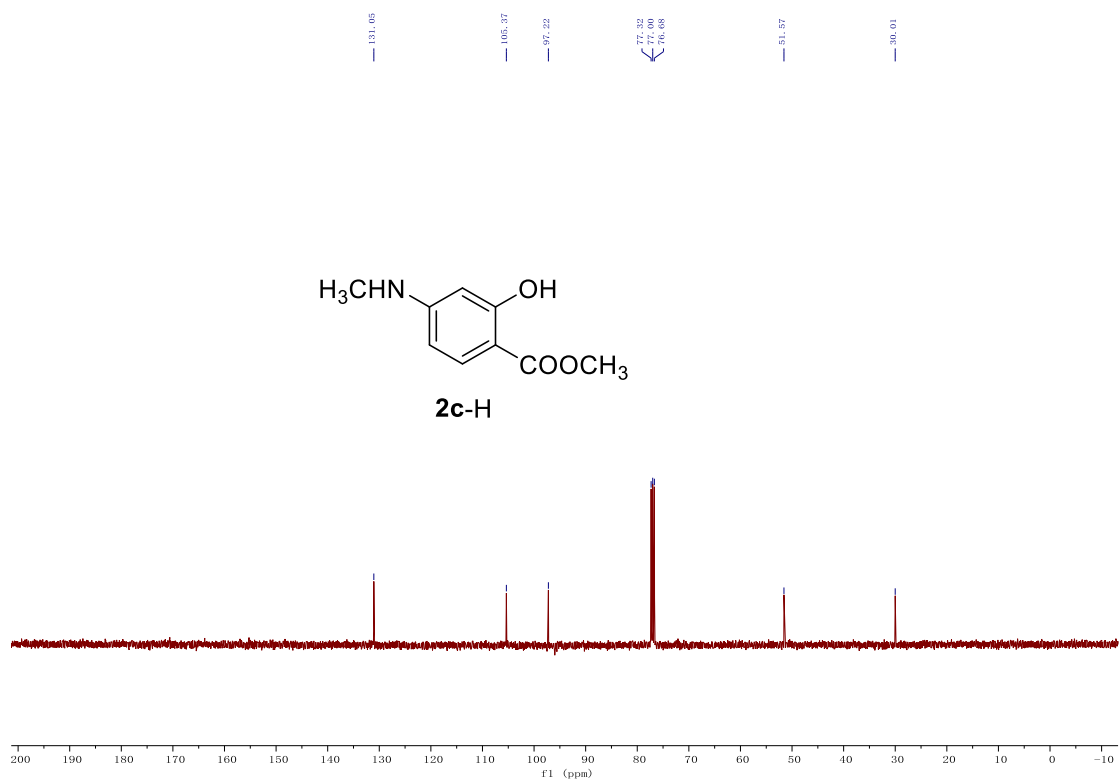

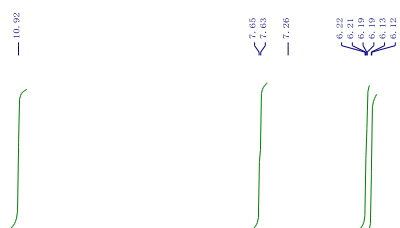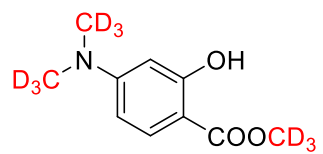

2d

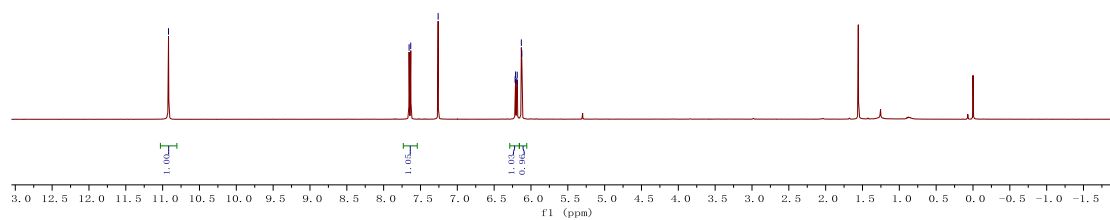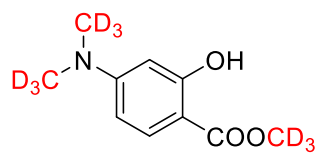

2d

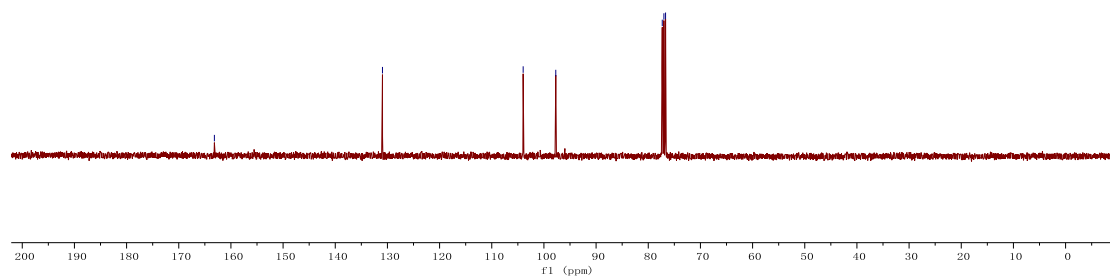

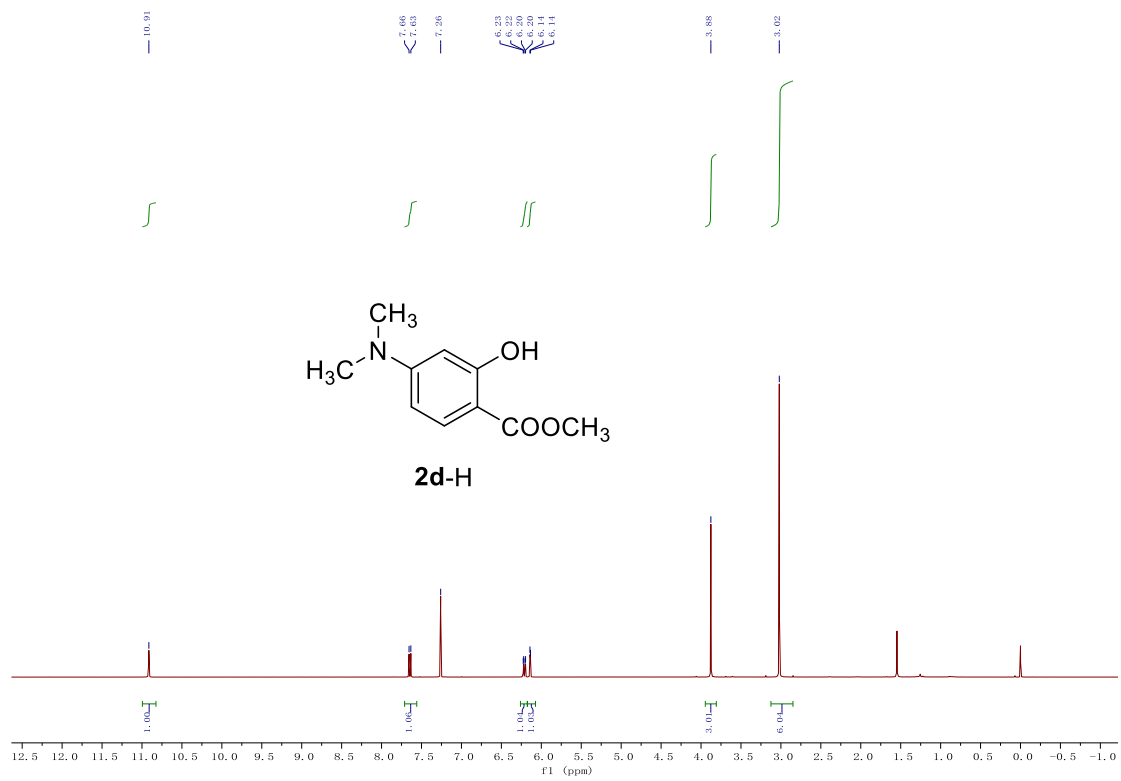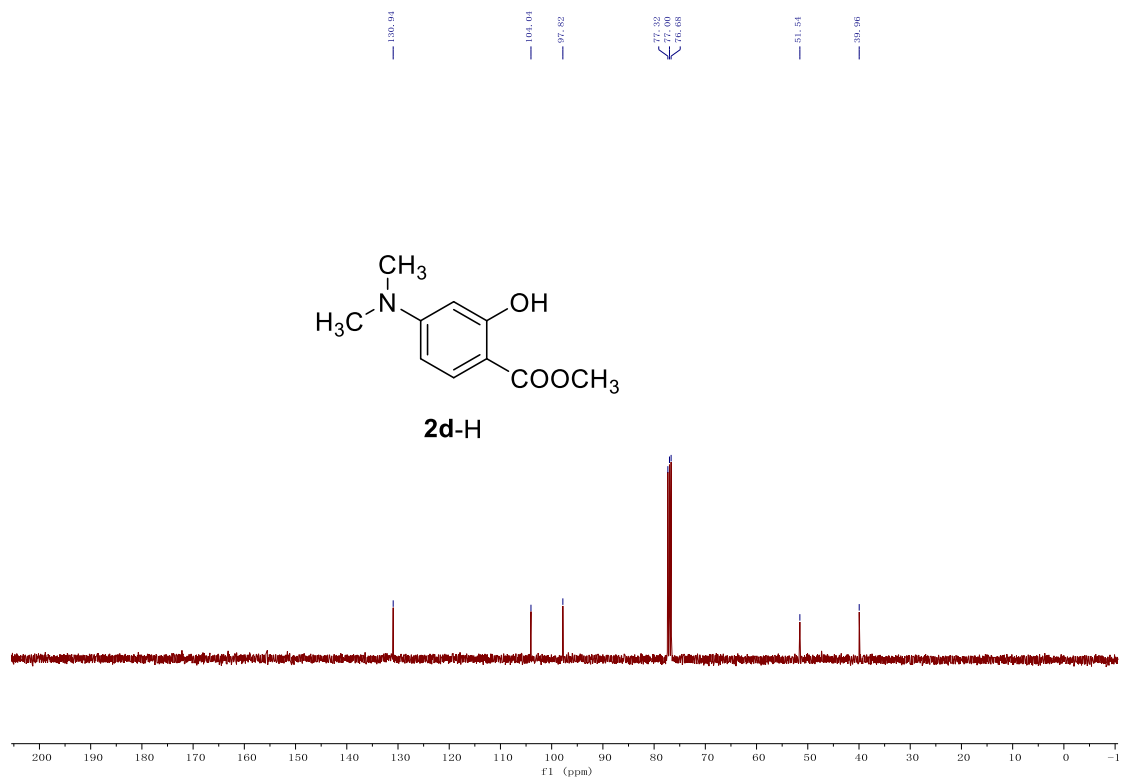

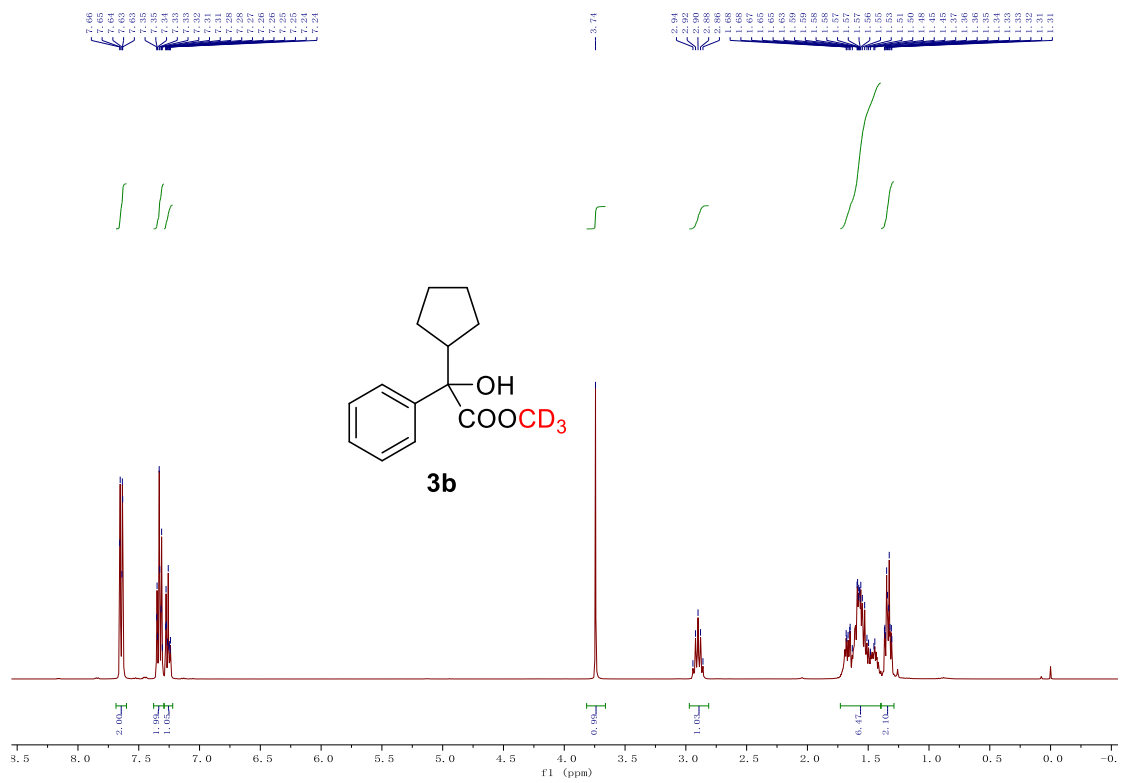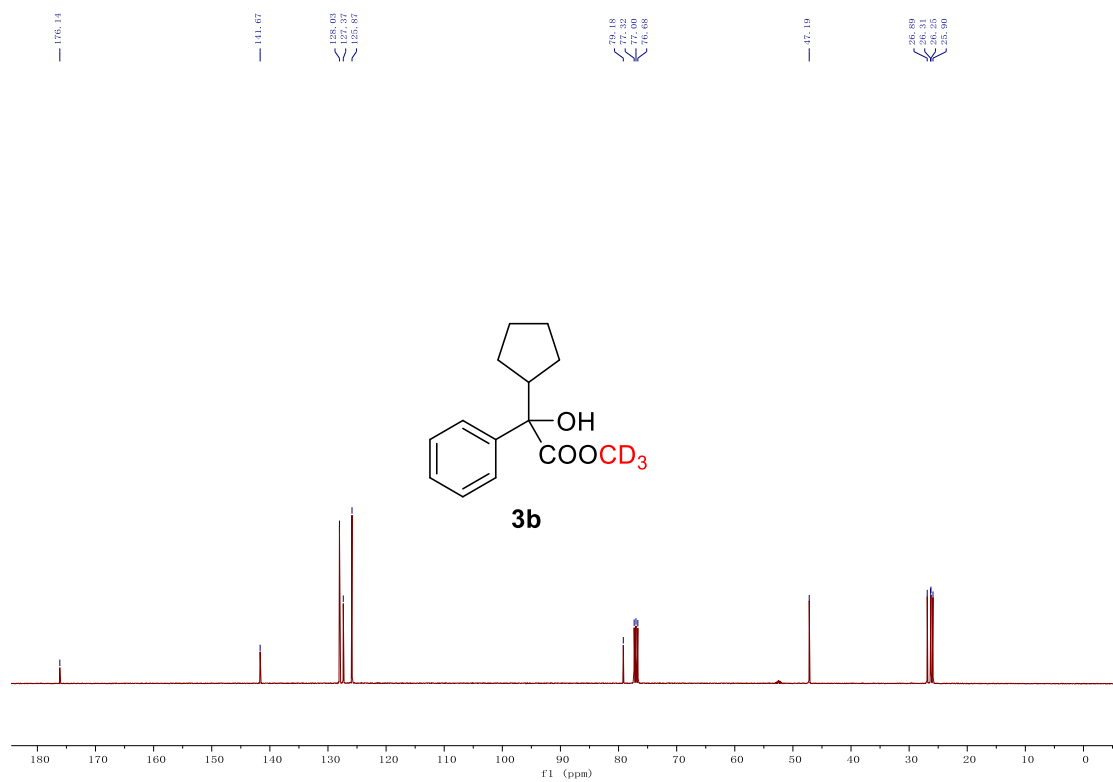

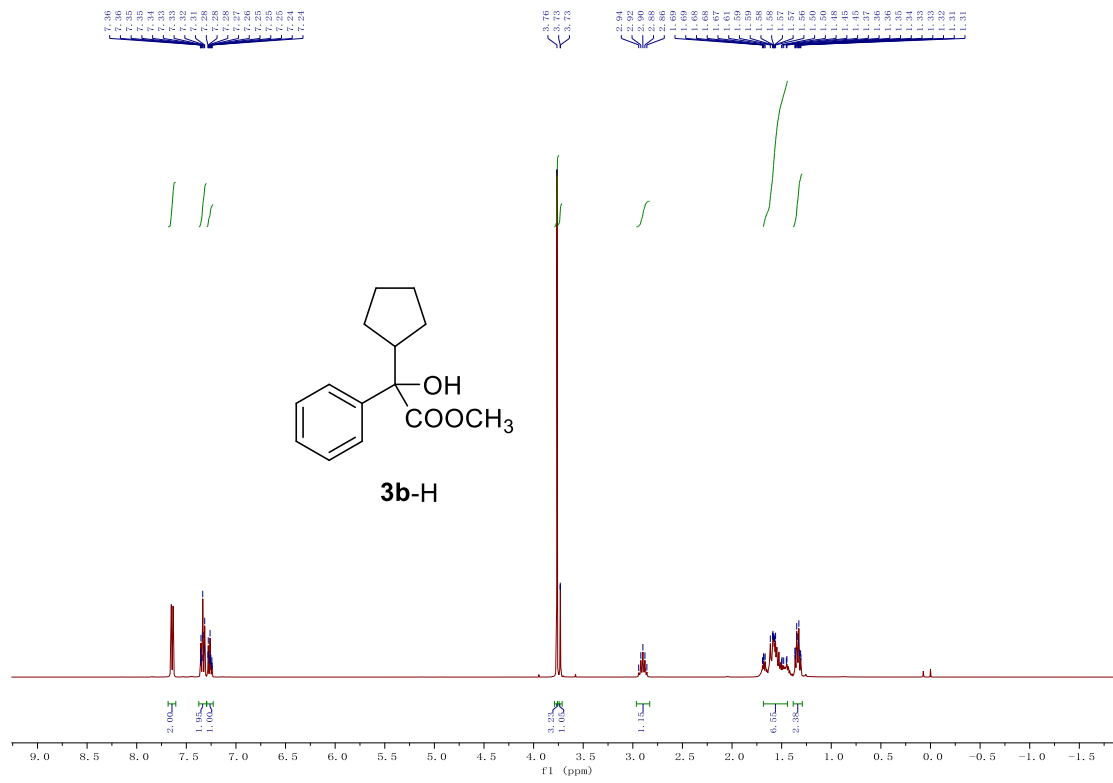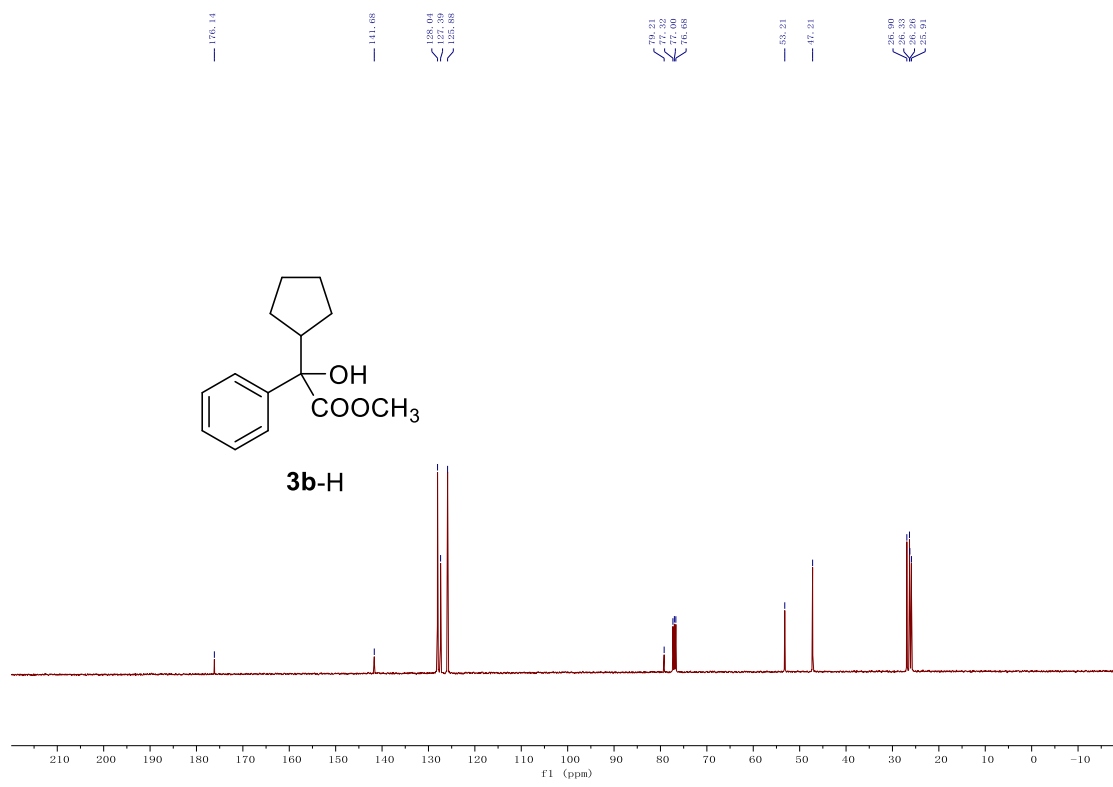

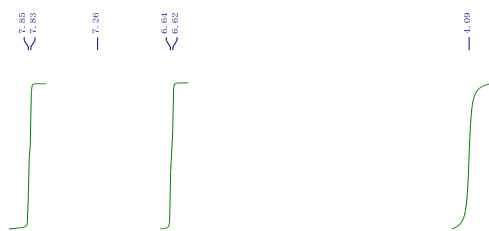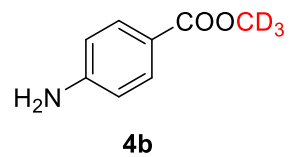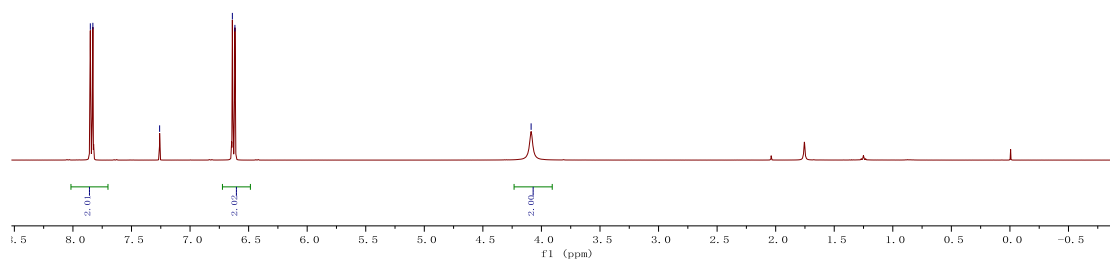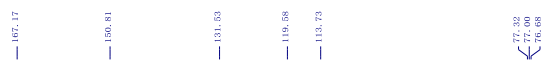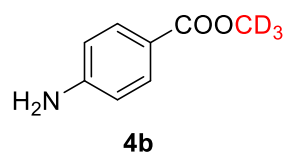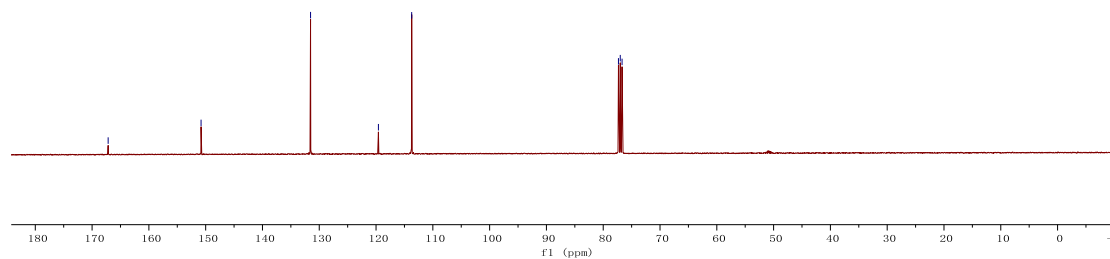



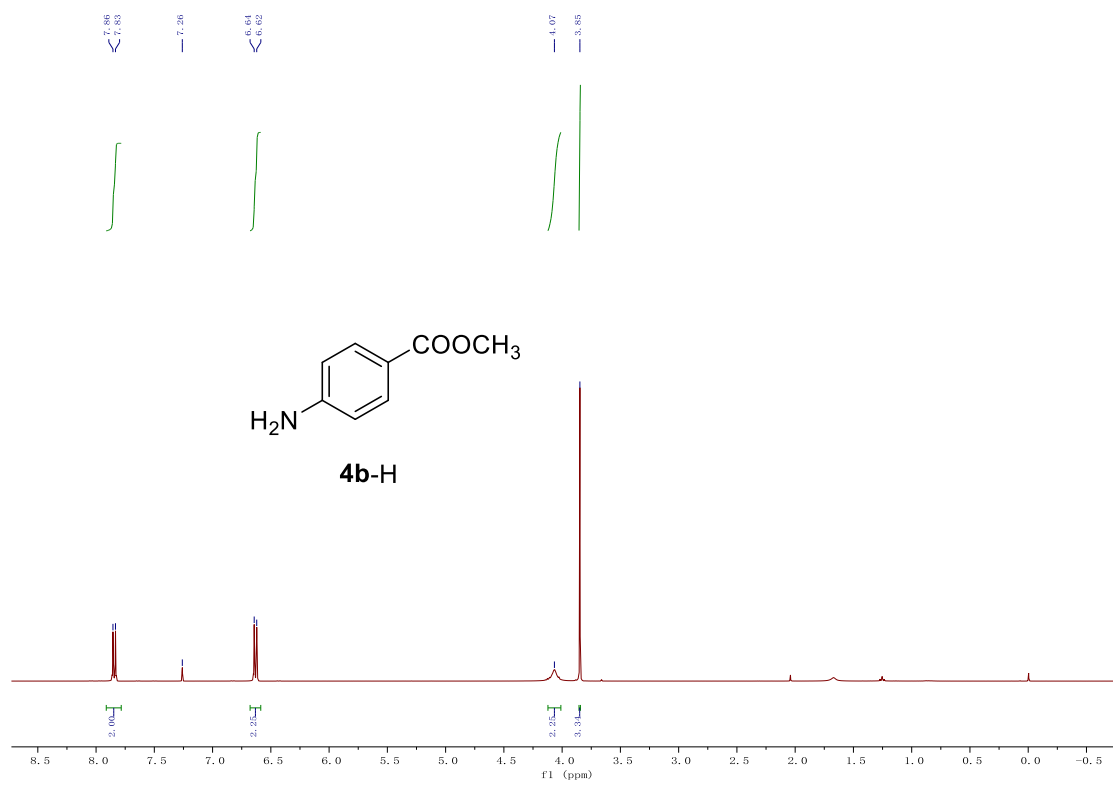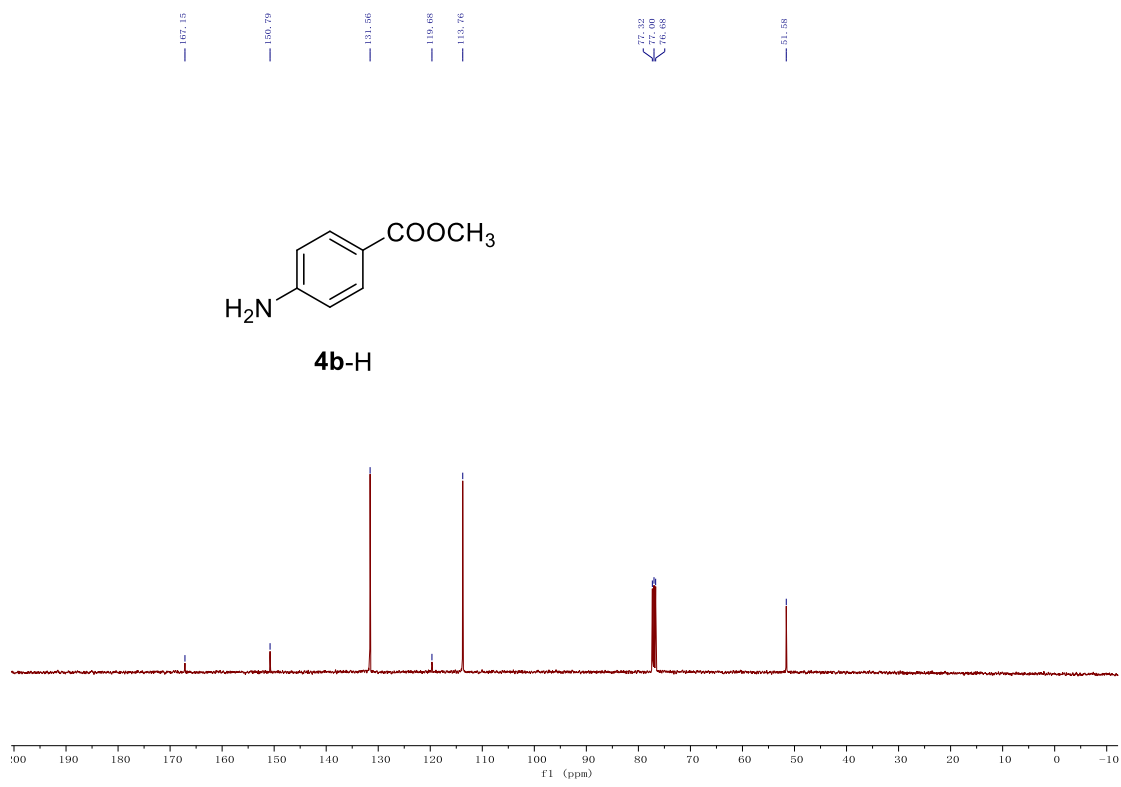

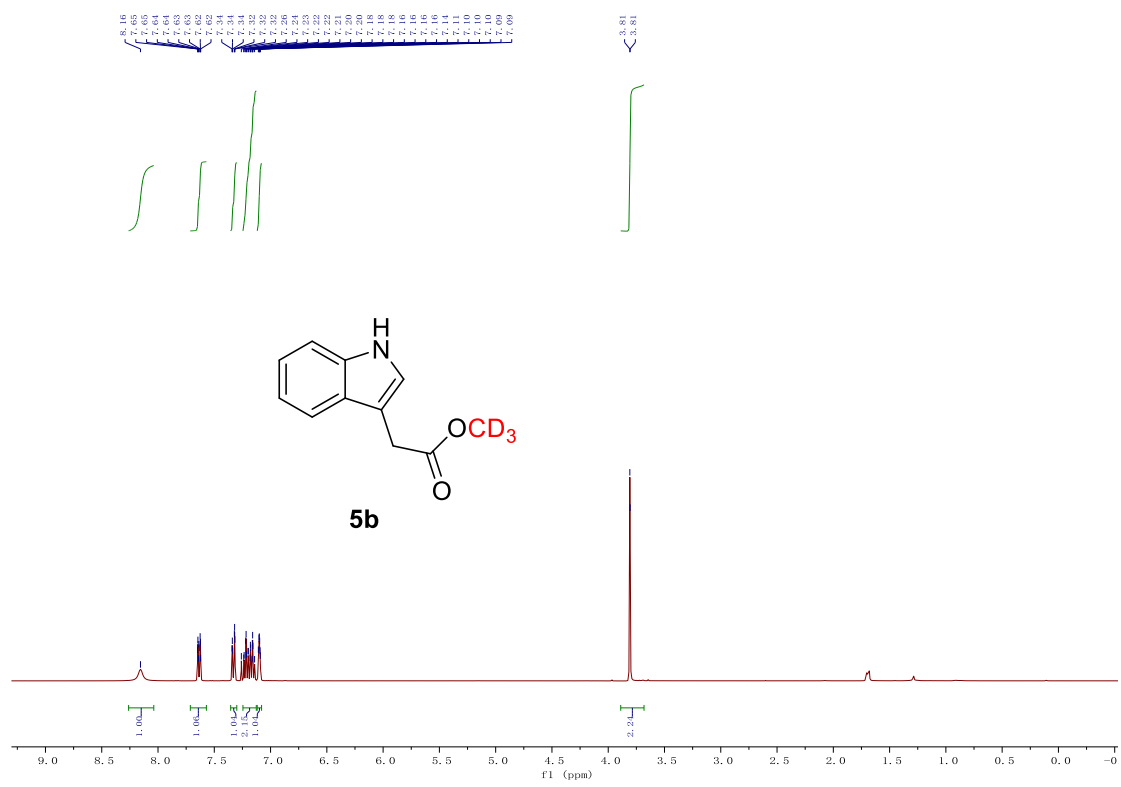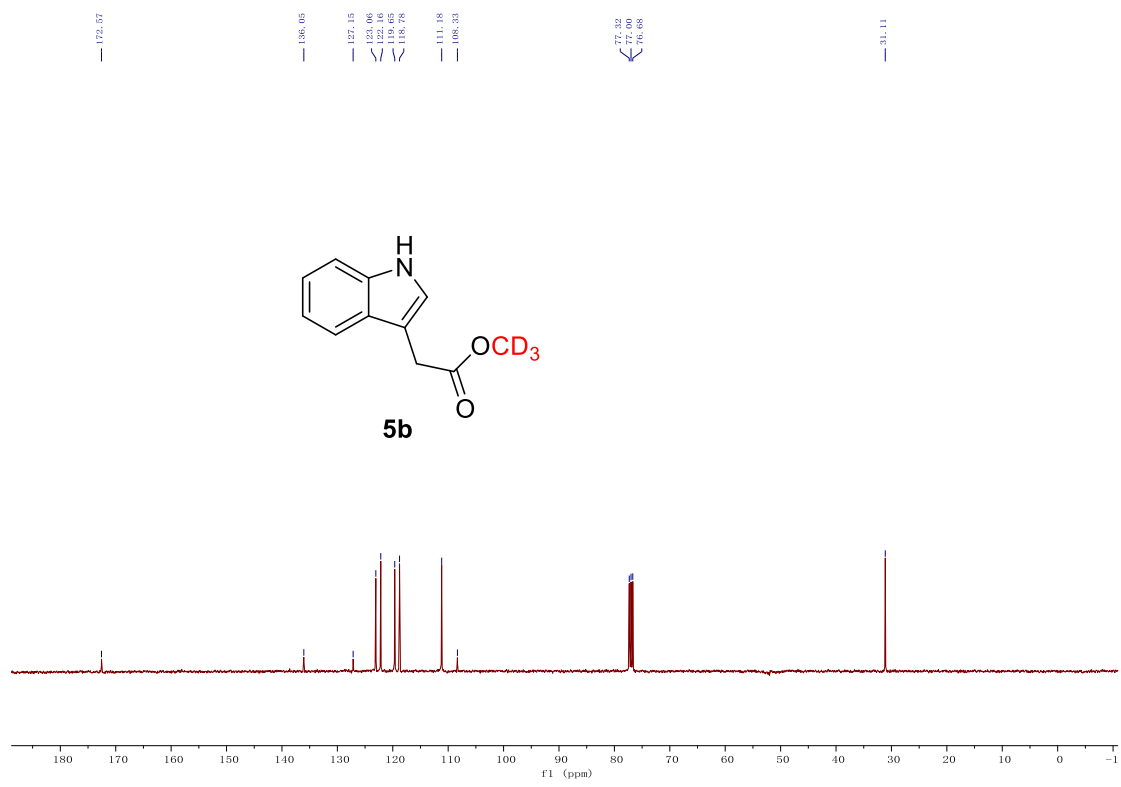

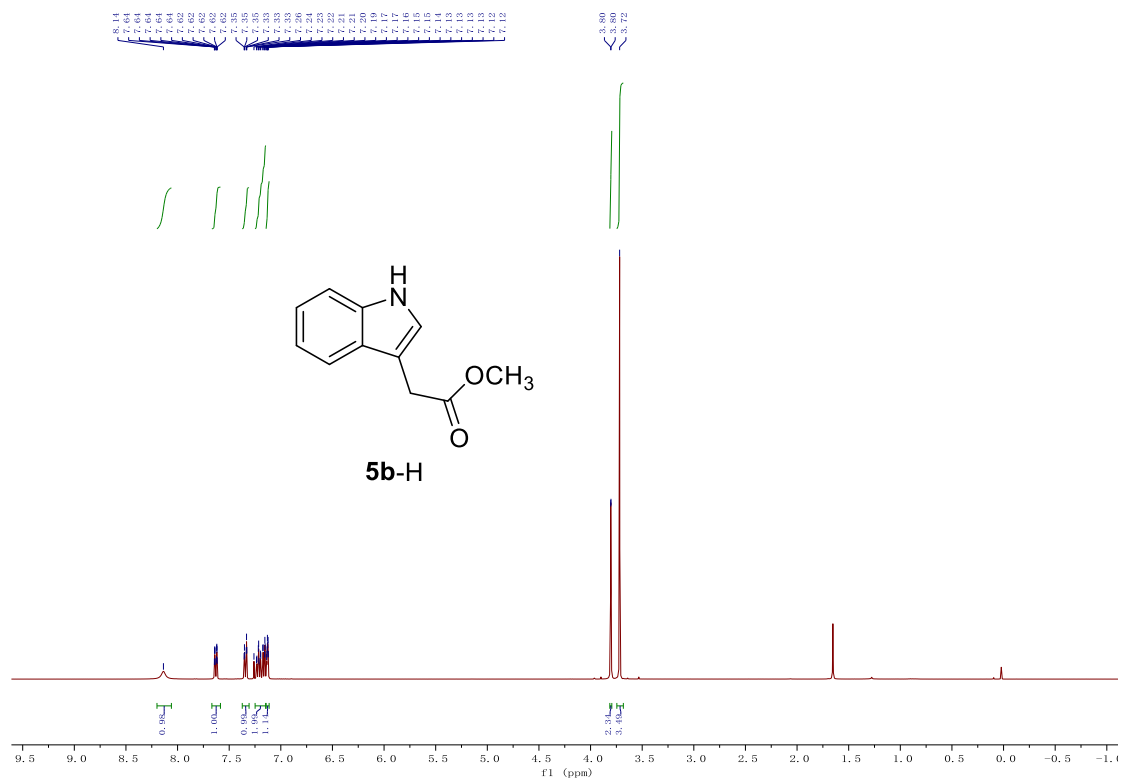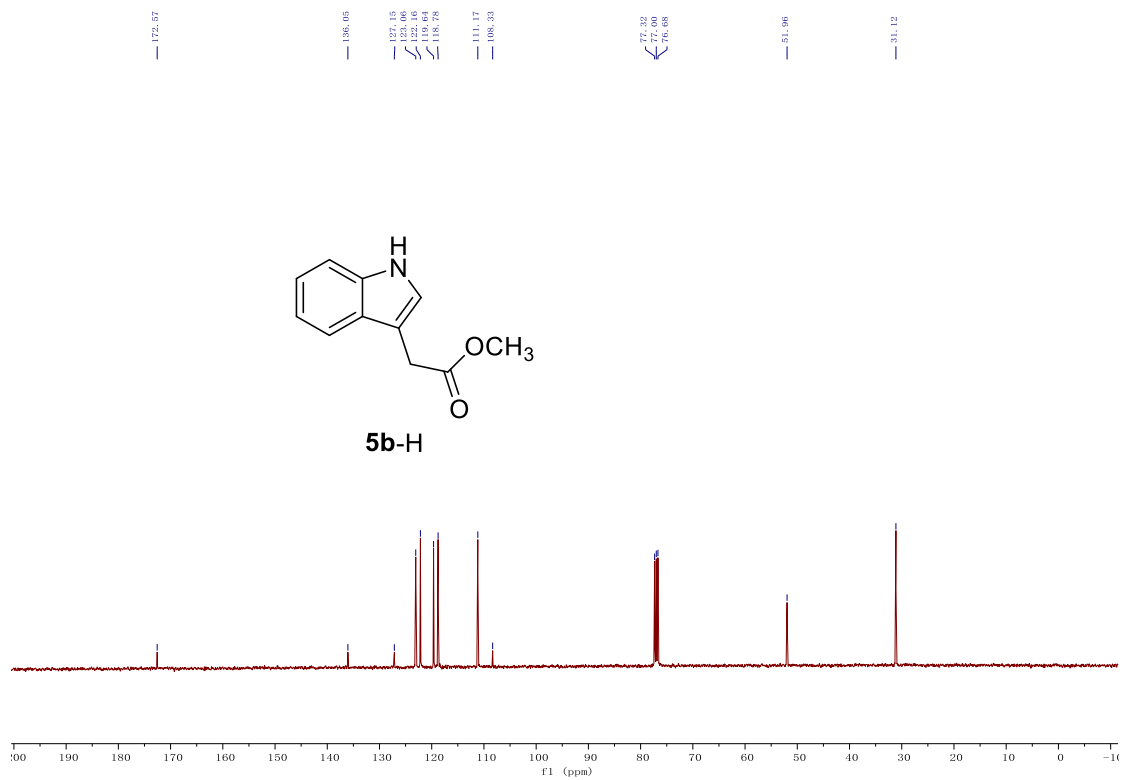

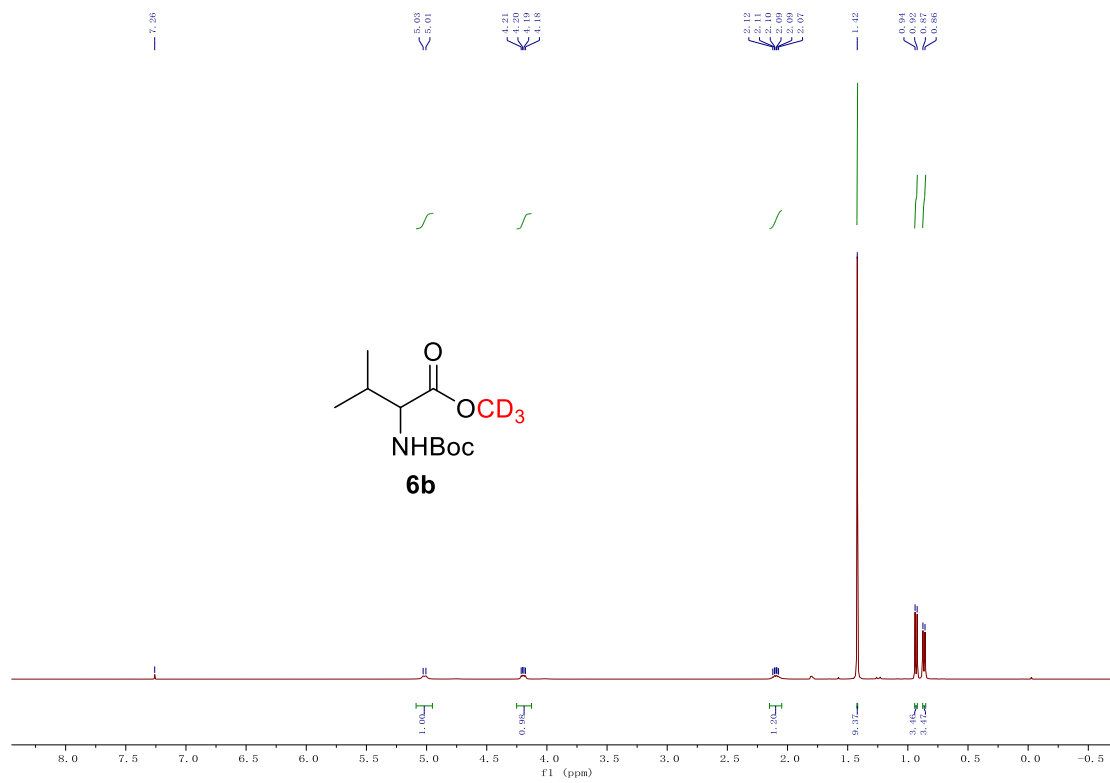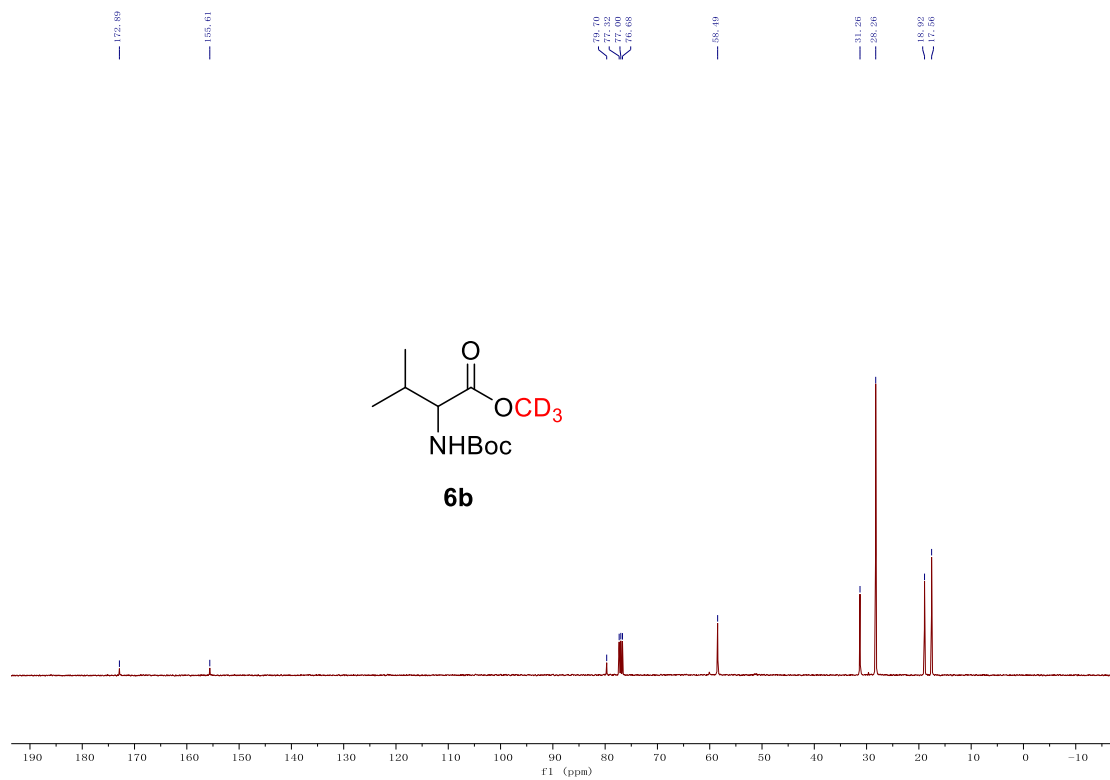

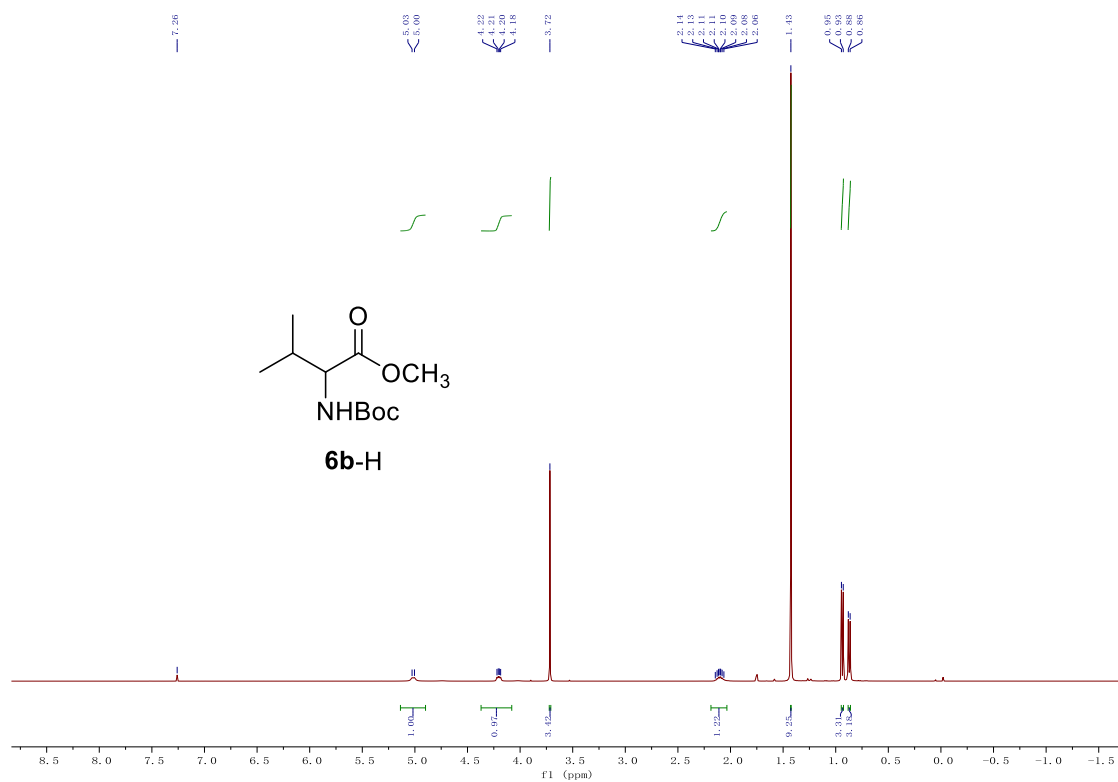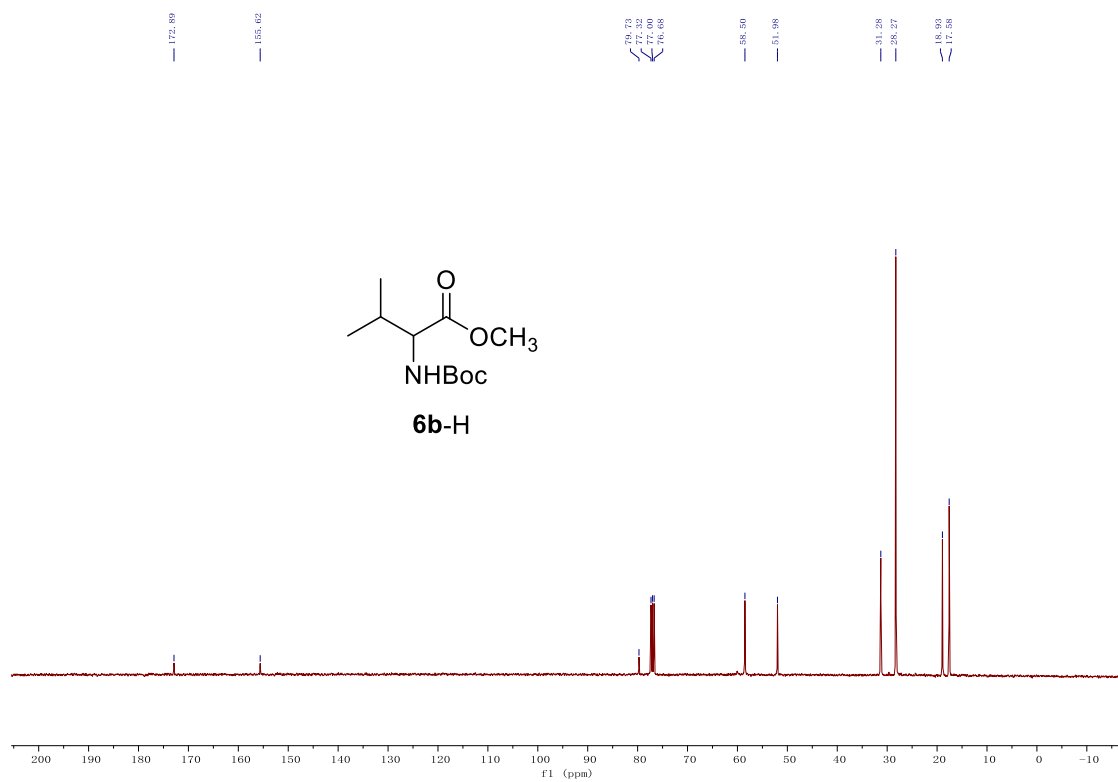

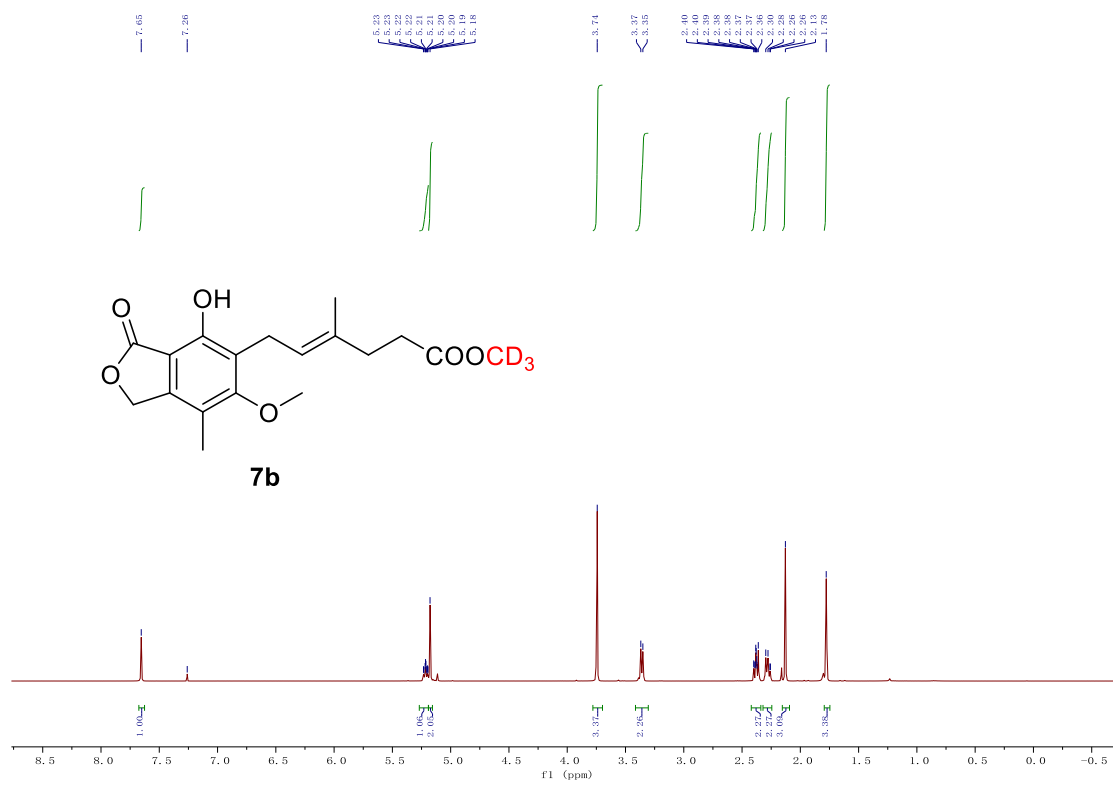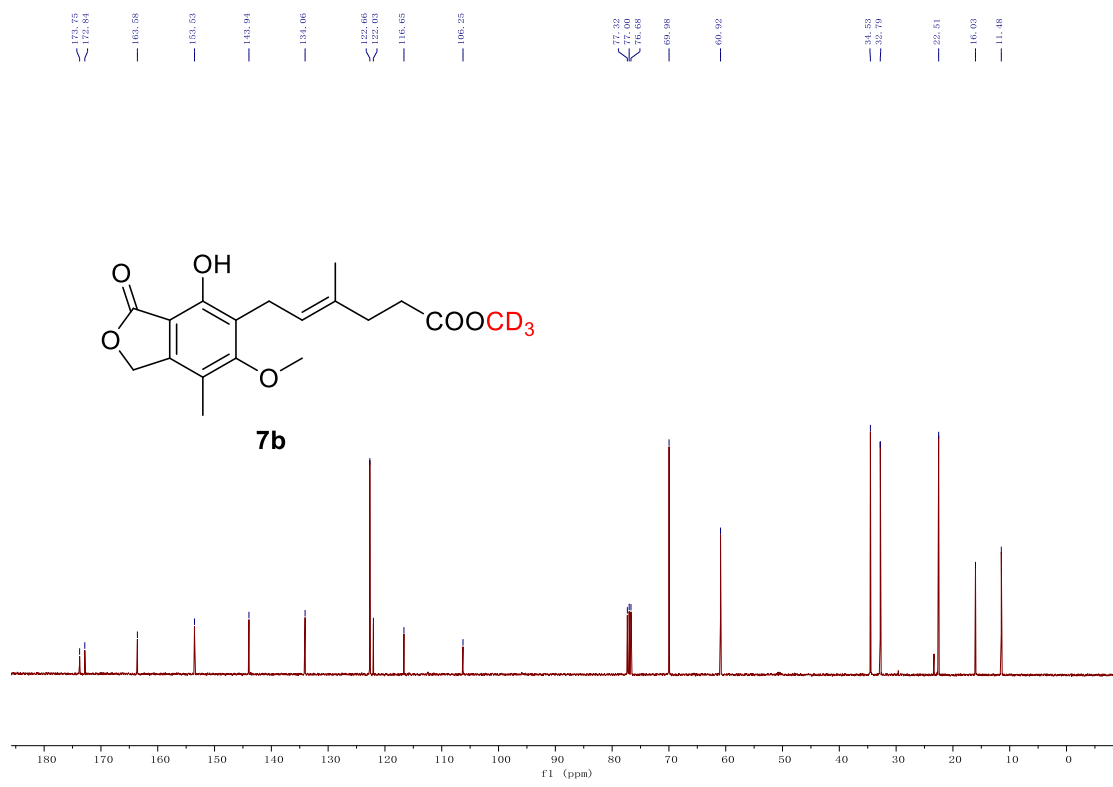

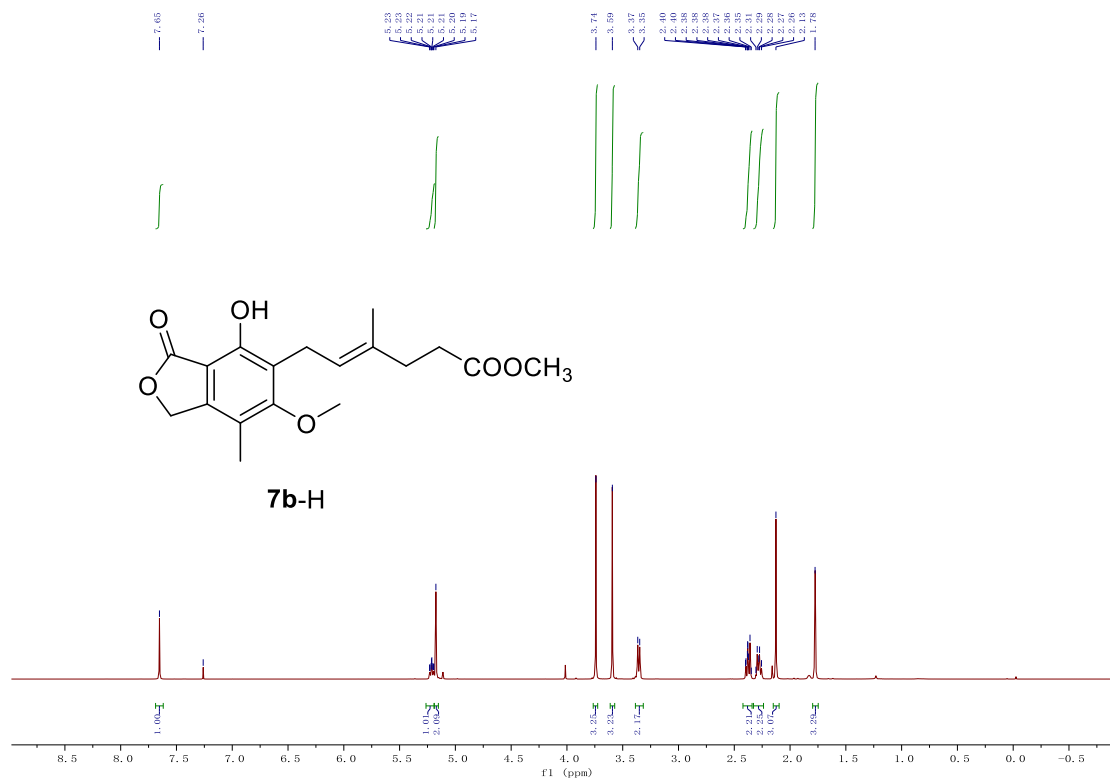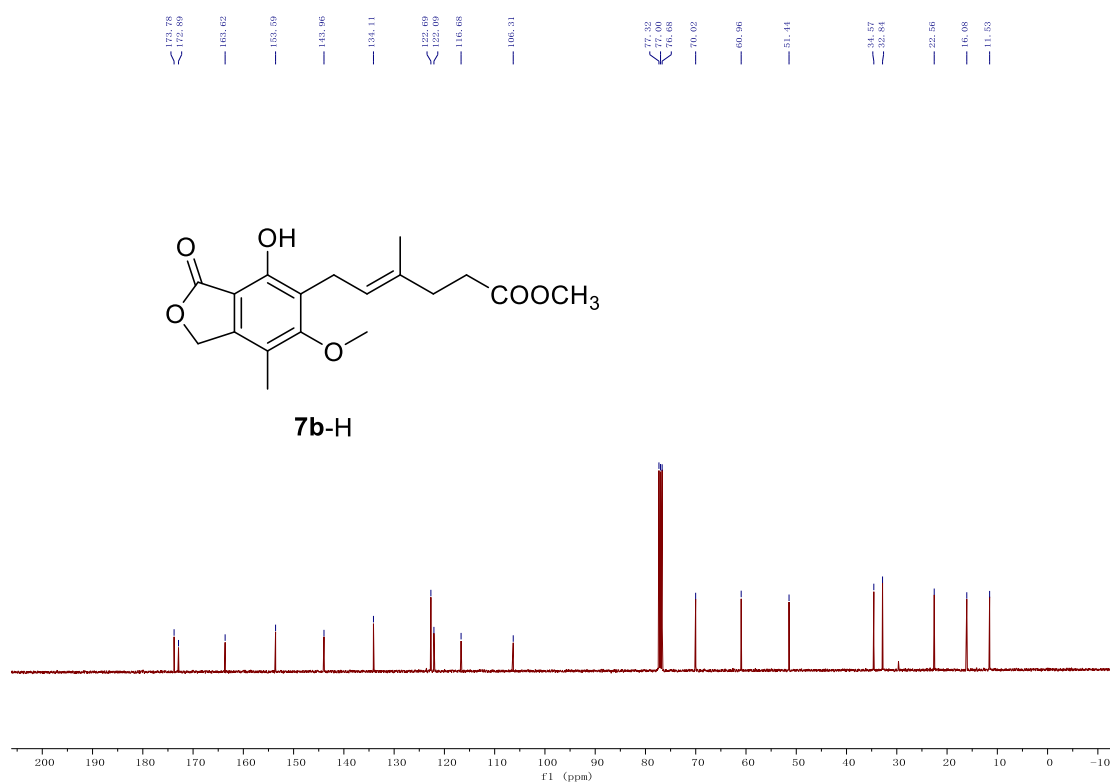

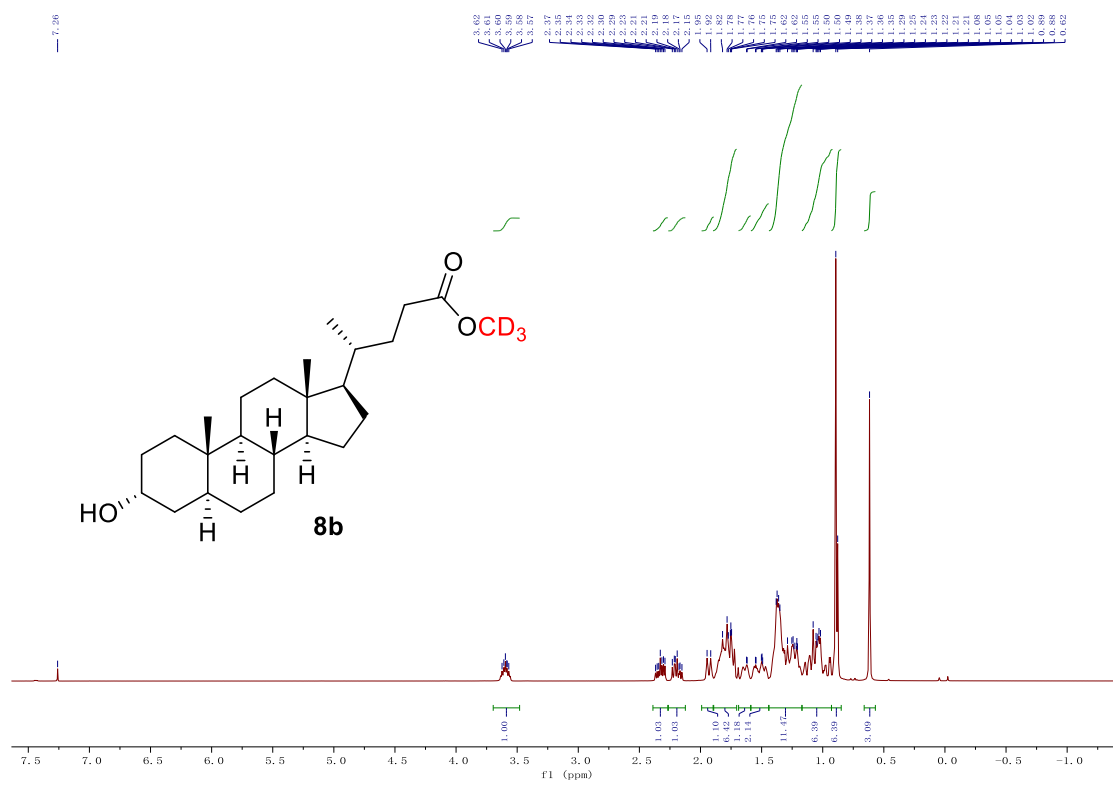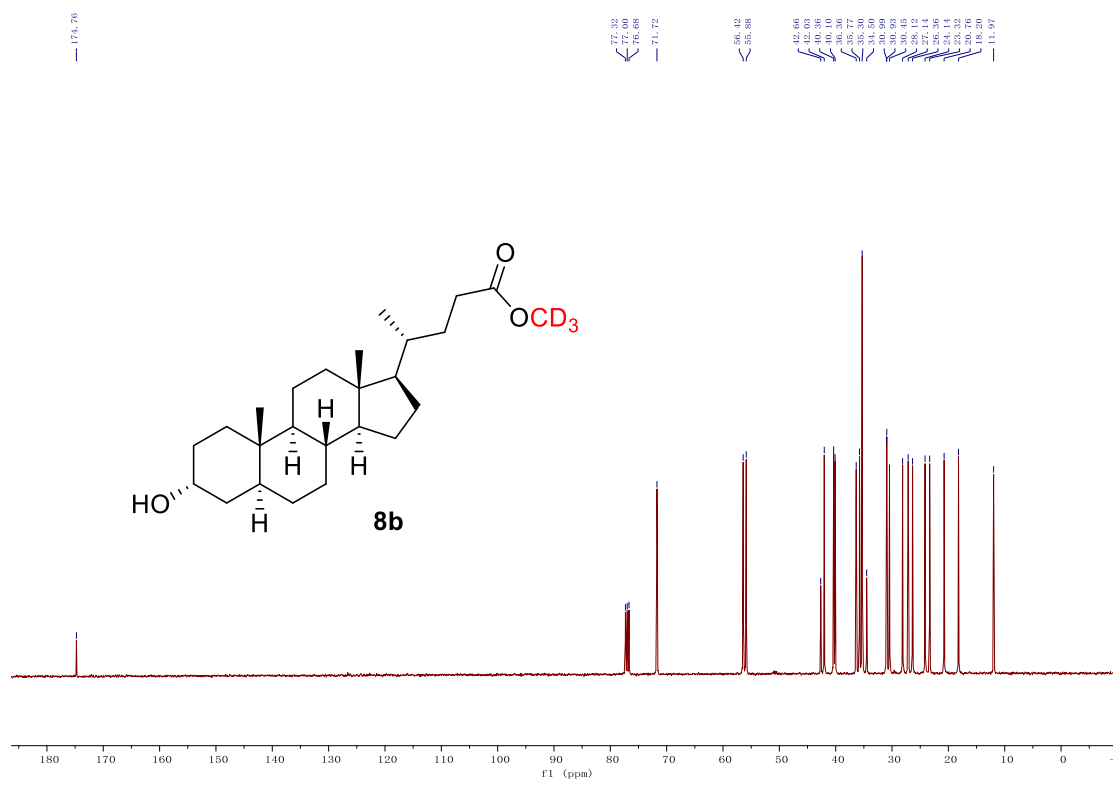



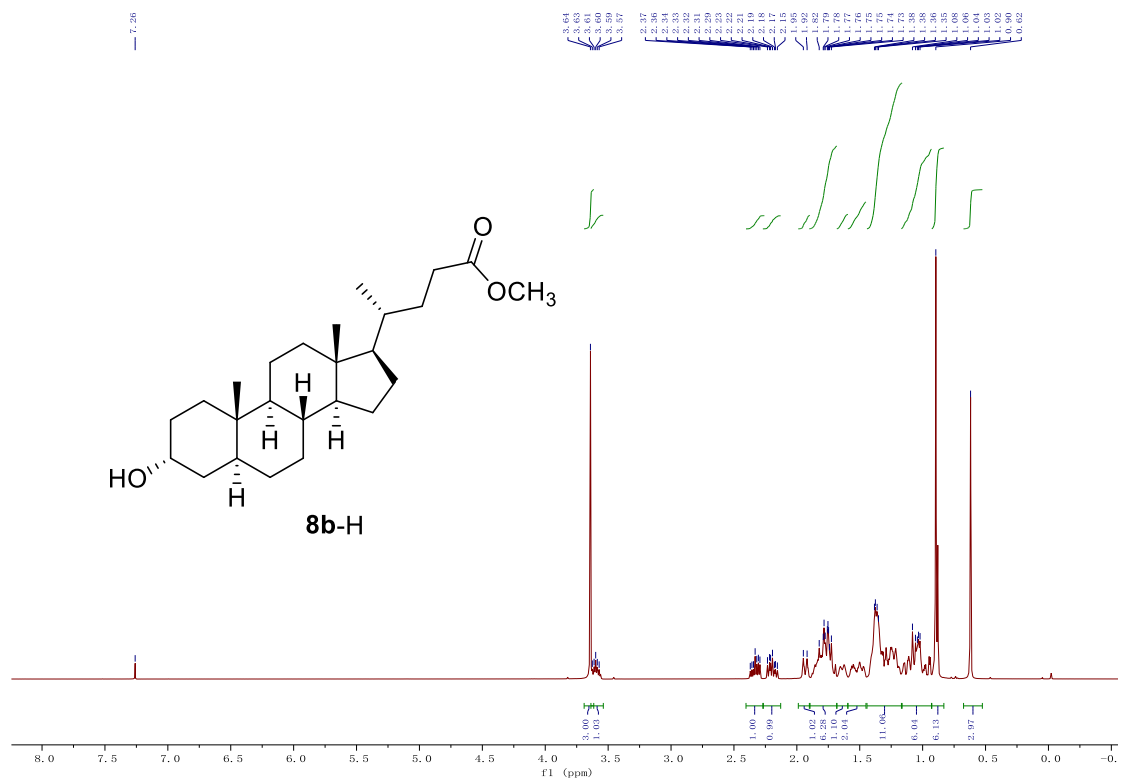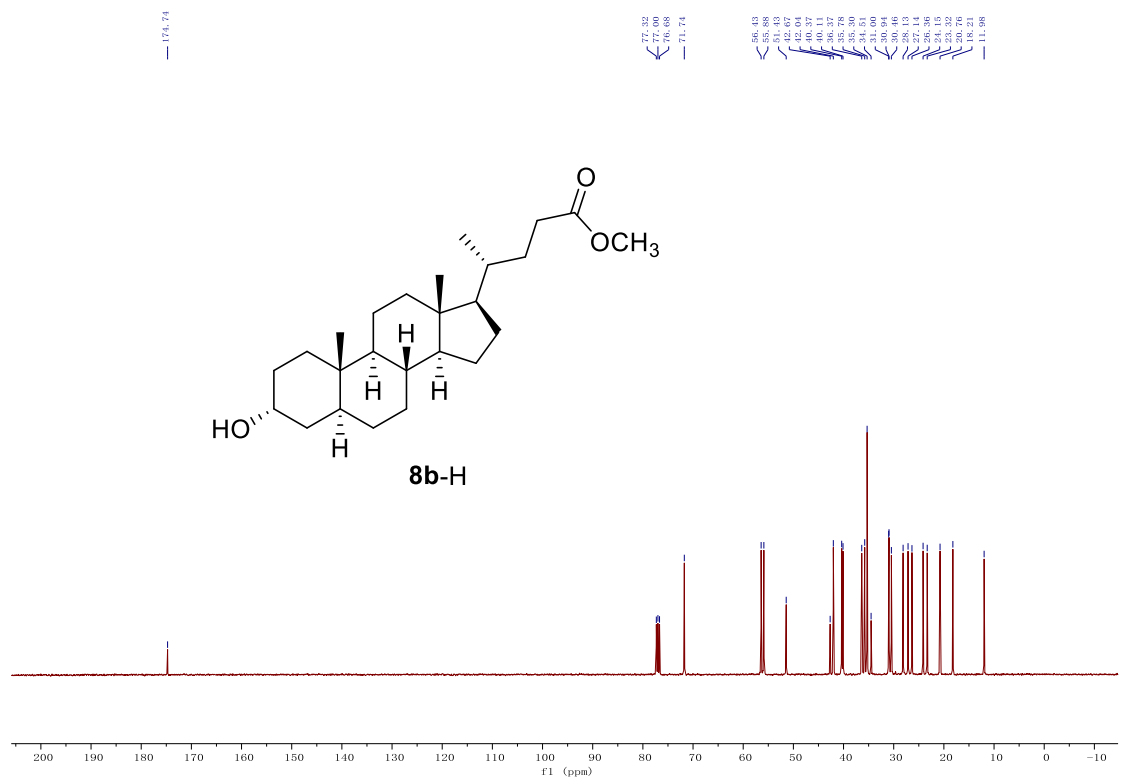

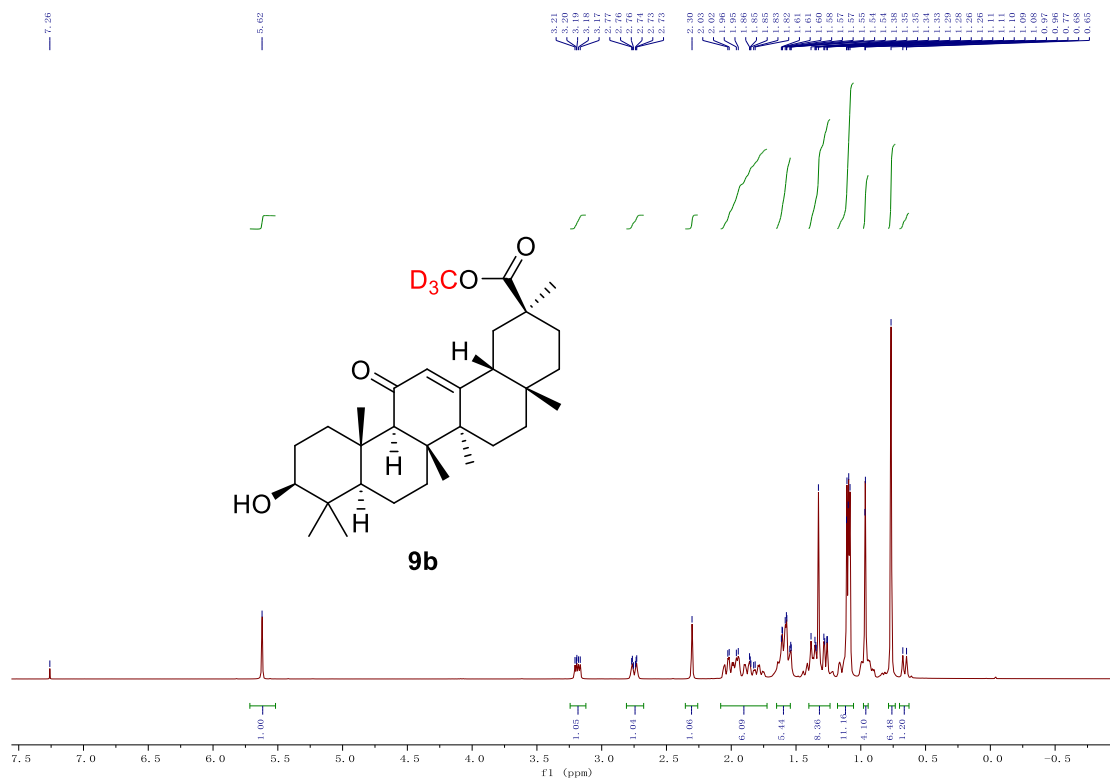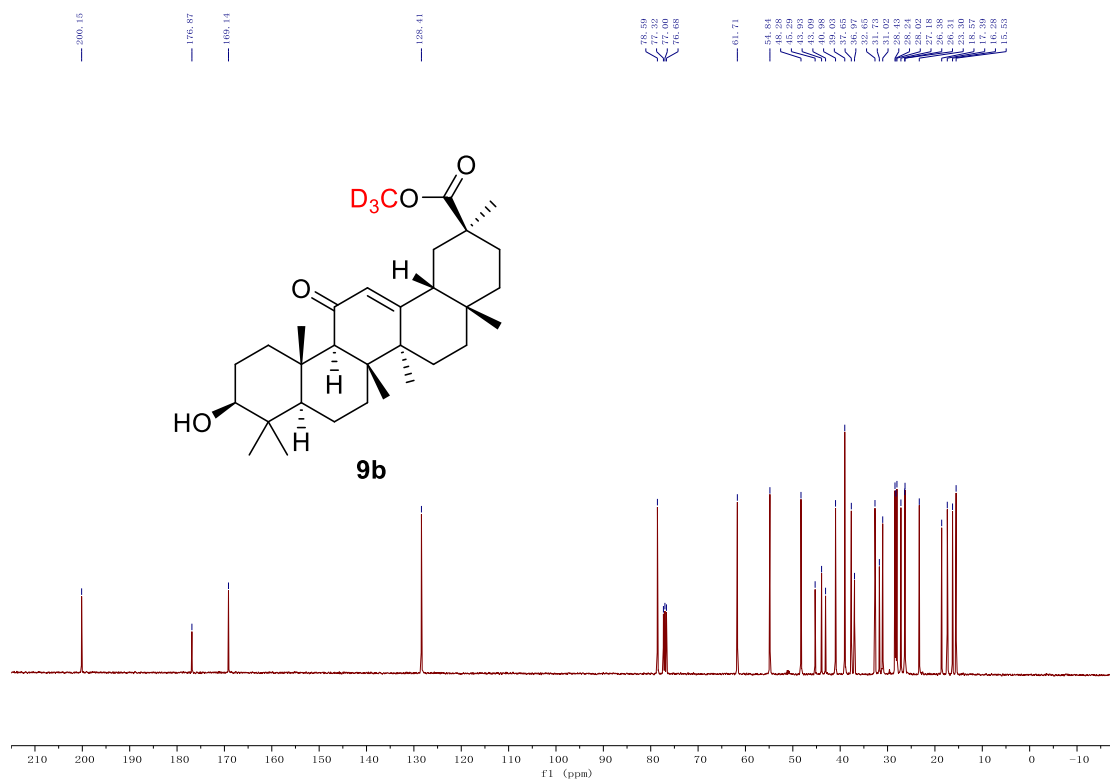

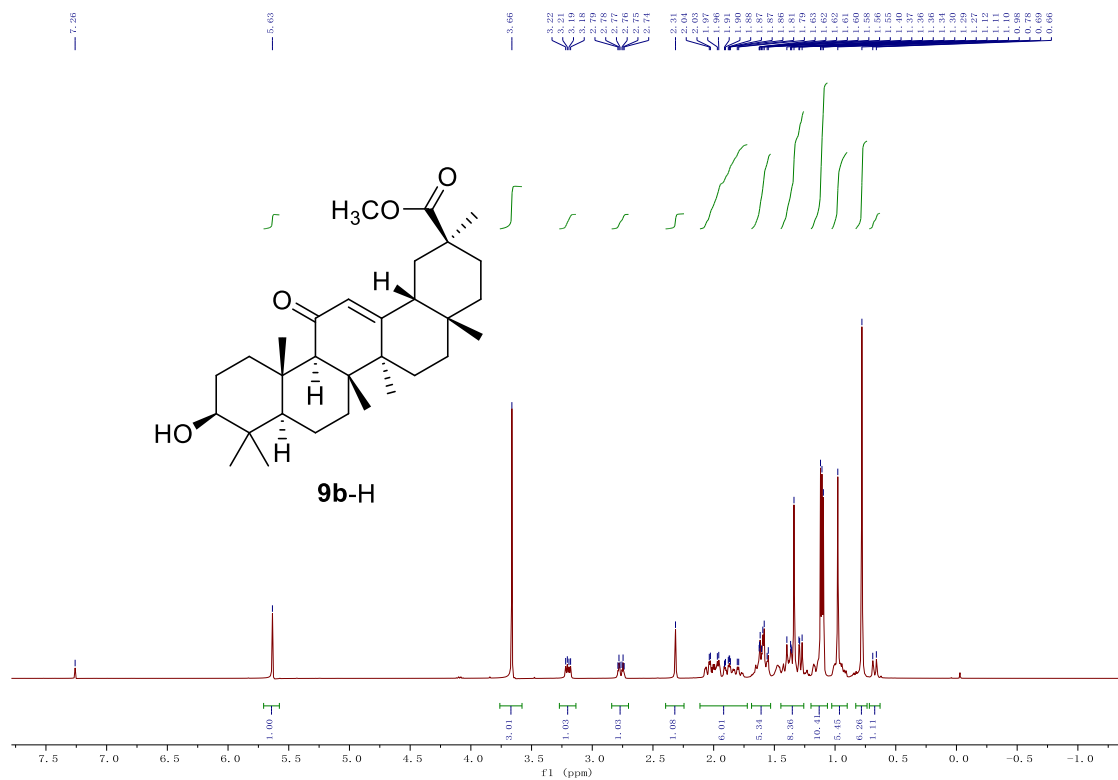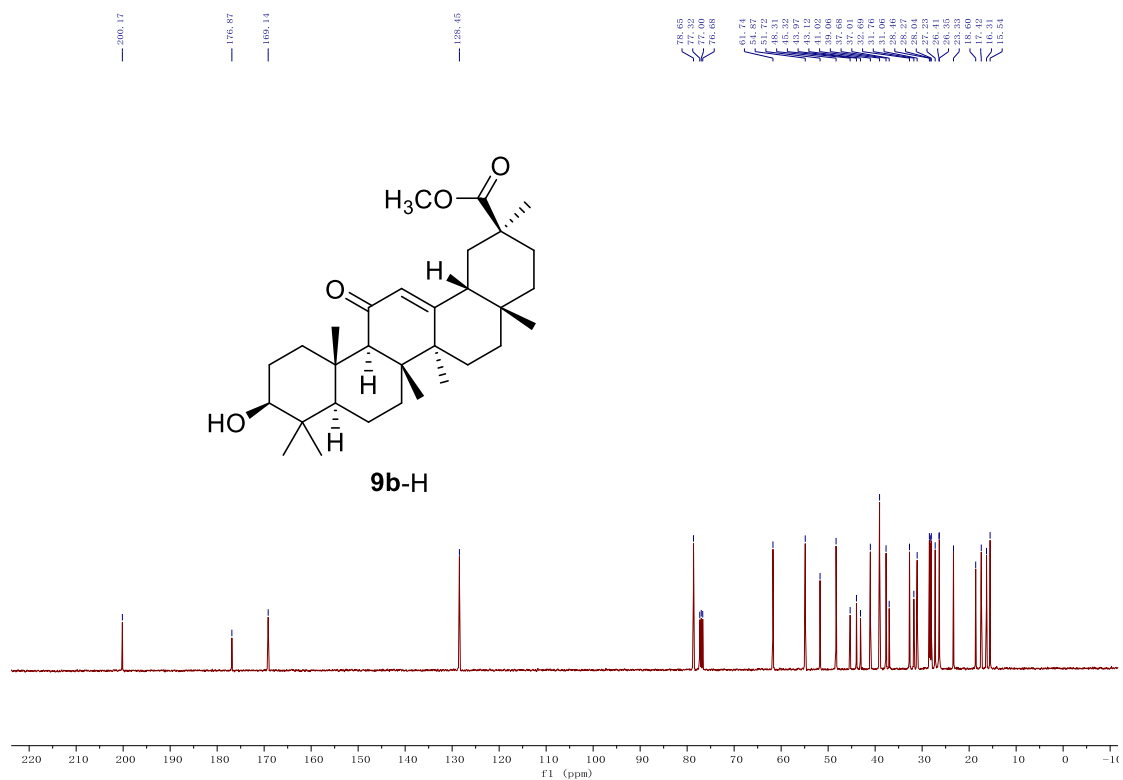

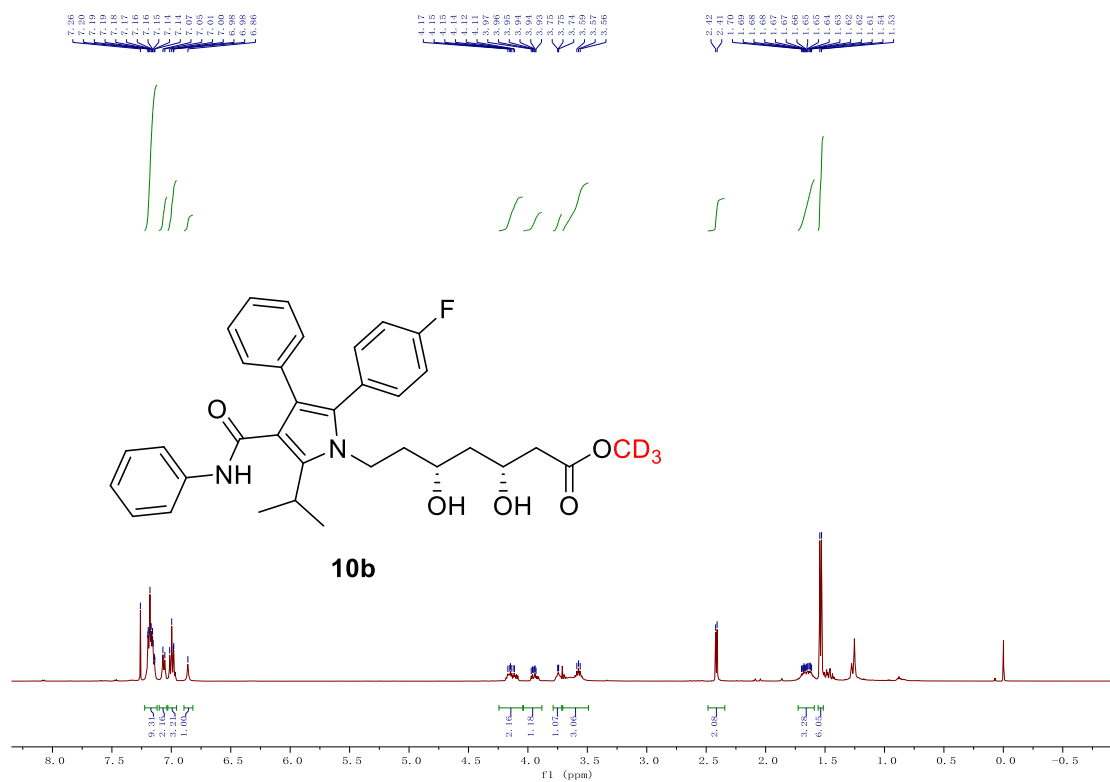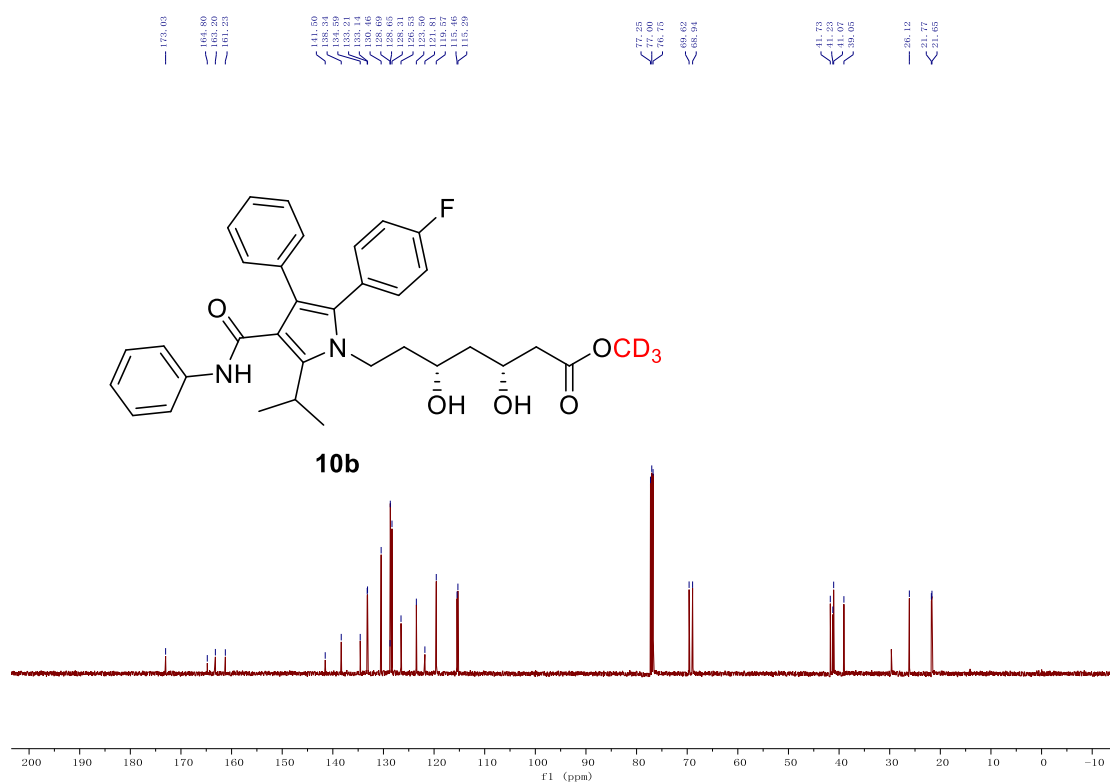

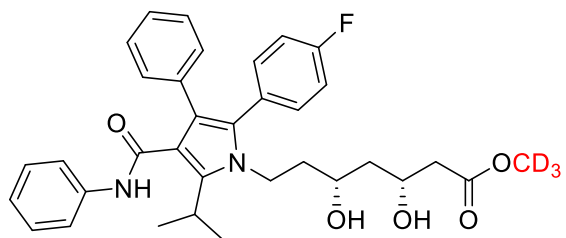

10b

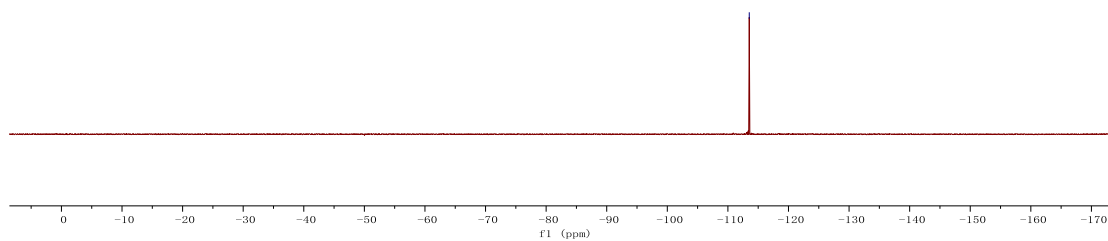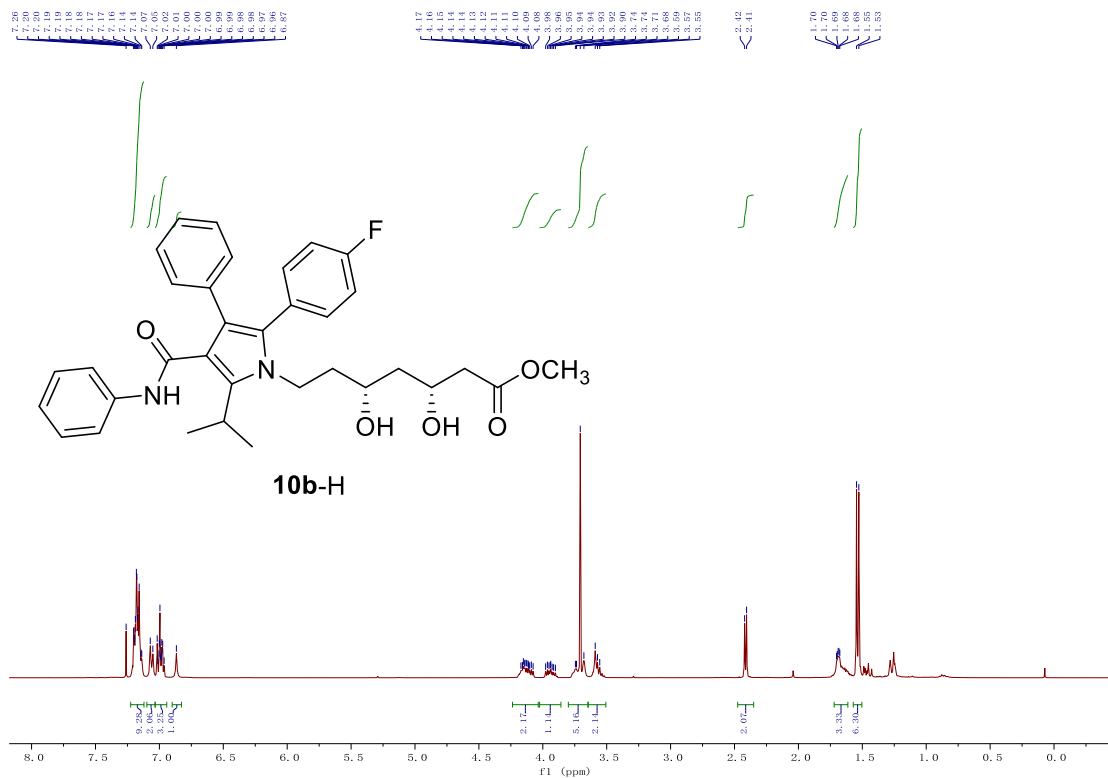

172.97  
 164.82  
 163.43  
 160.97  
 138.37  
 134.57  
 133.70  
 133.29  
 130.43  
 128.99  
 128.30  
 128.32  
 127.80  
 119.97  
 113.26  
 77.32  
 76.68  
 76.68  
 69.60  
 68.90  
 51.91  
 41.72  
 41.10  
 39.04  
 26.10  
 21.76  
 21.69

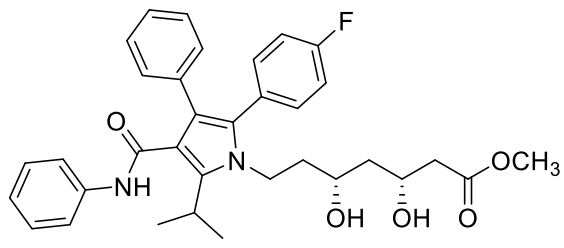

**10b-H**

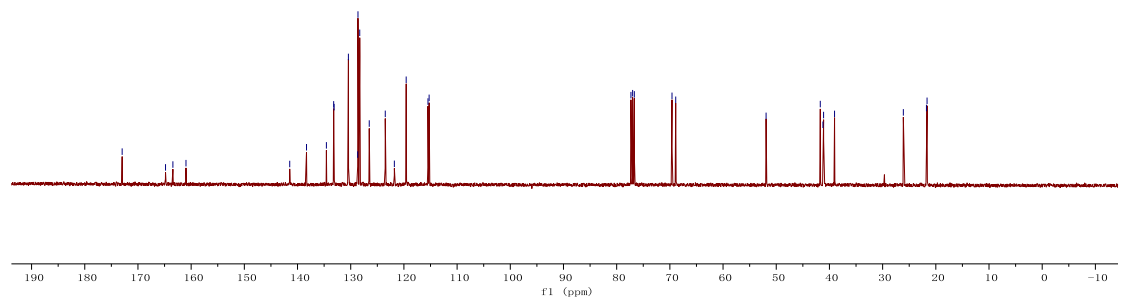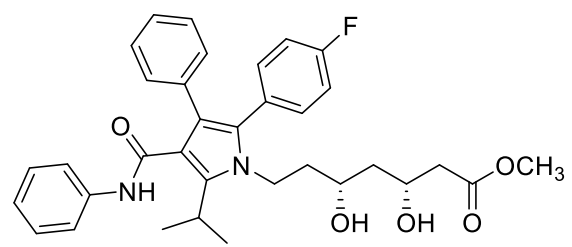

**10b-H**

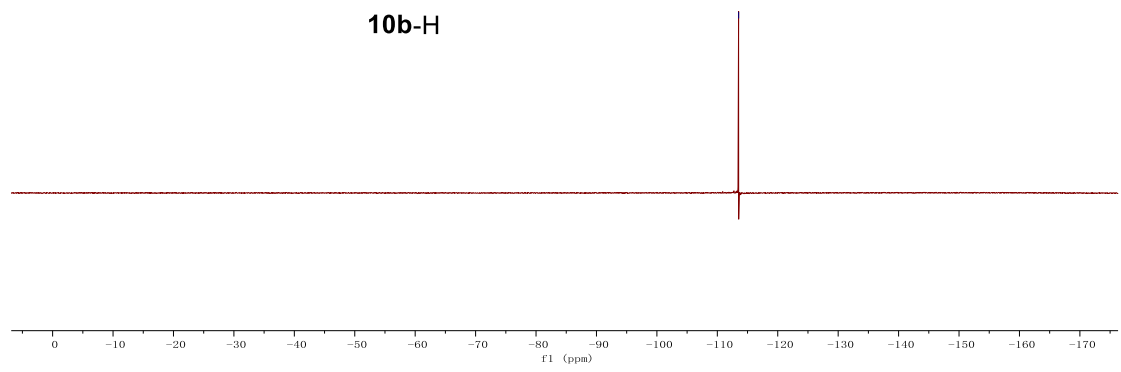

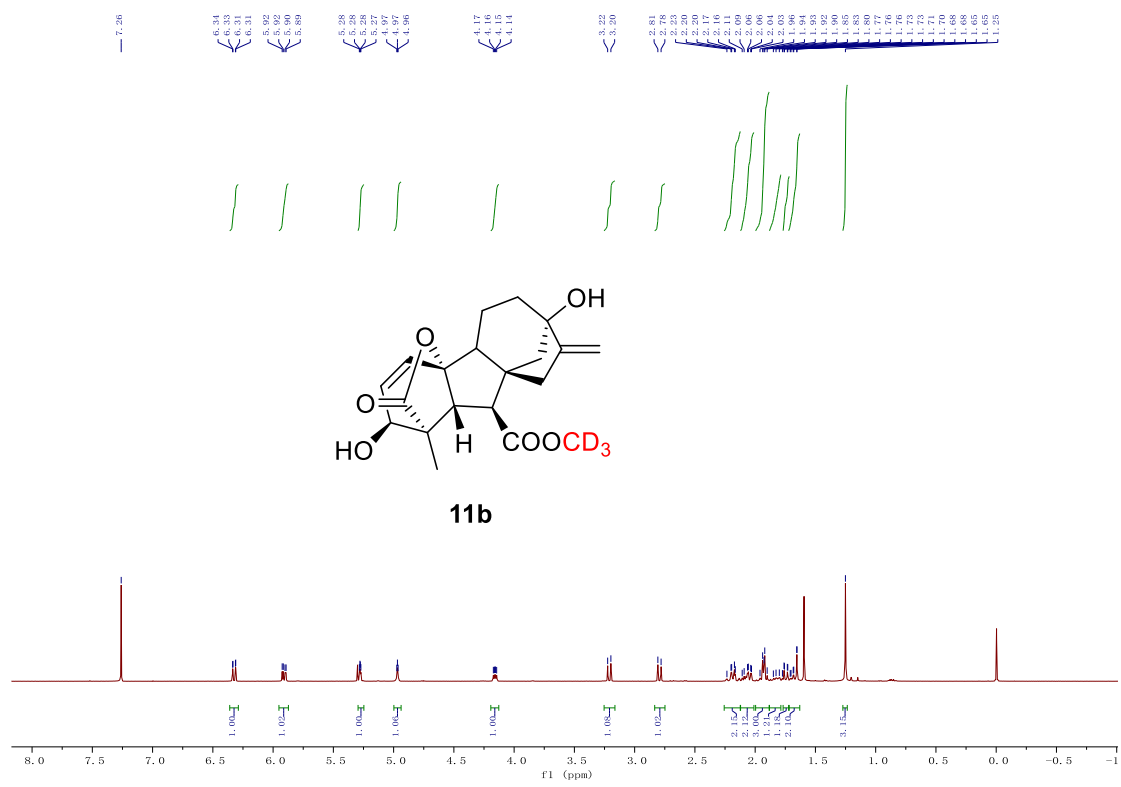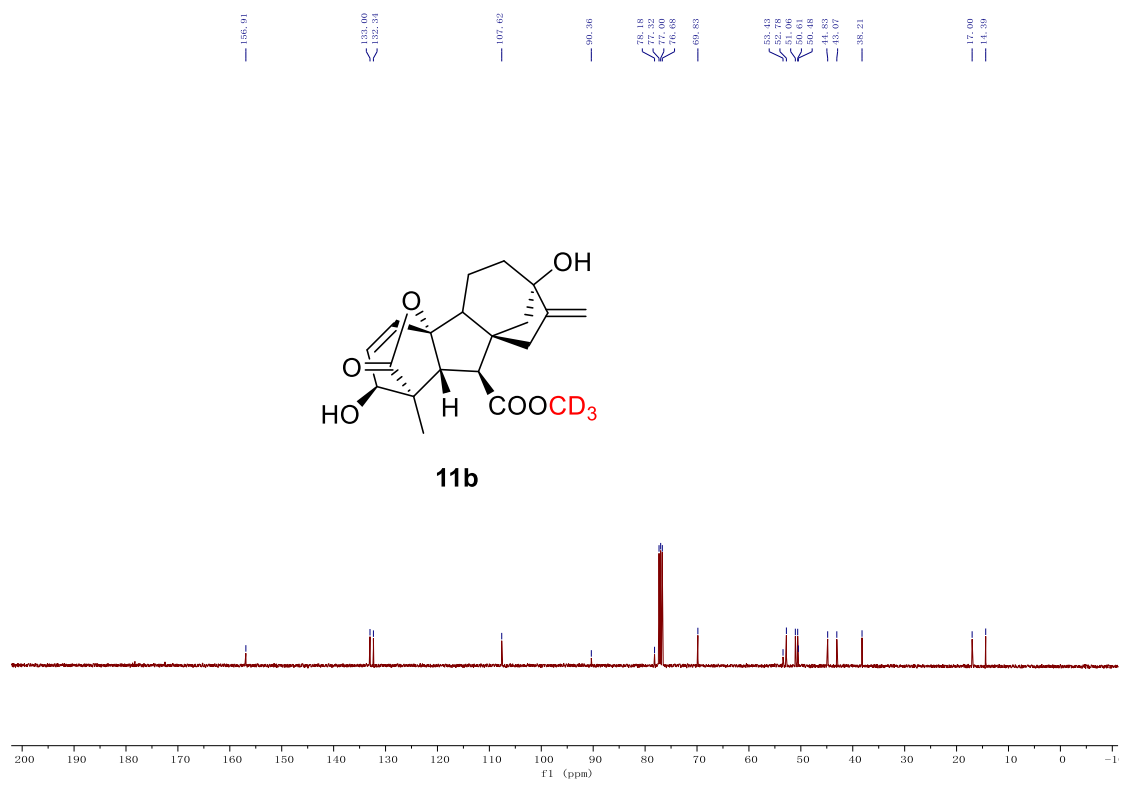

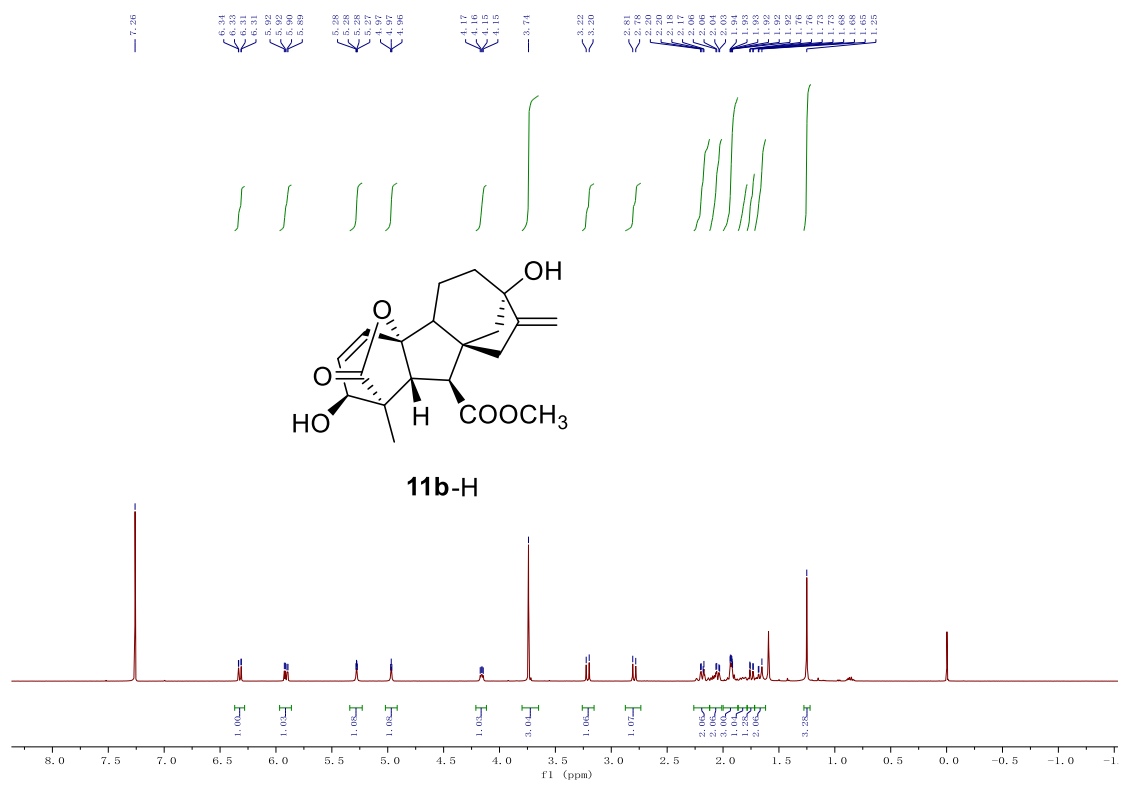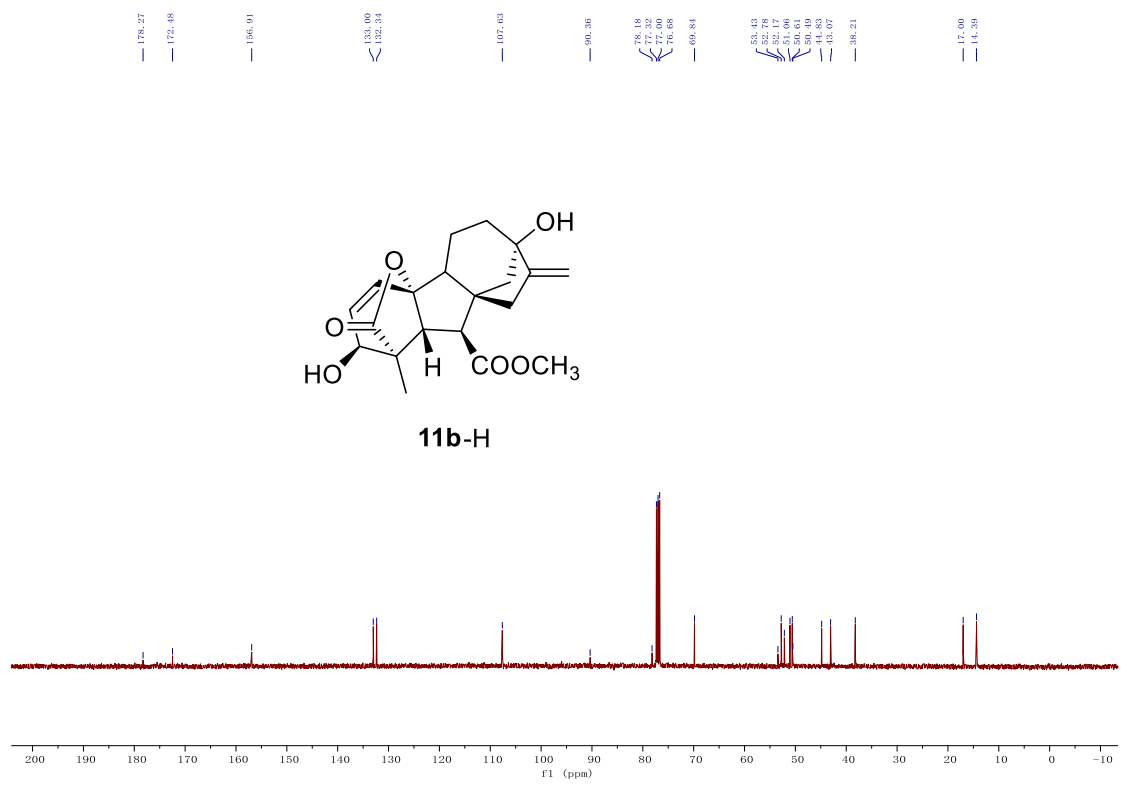



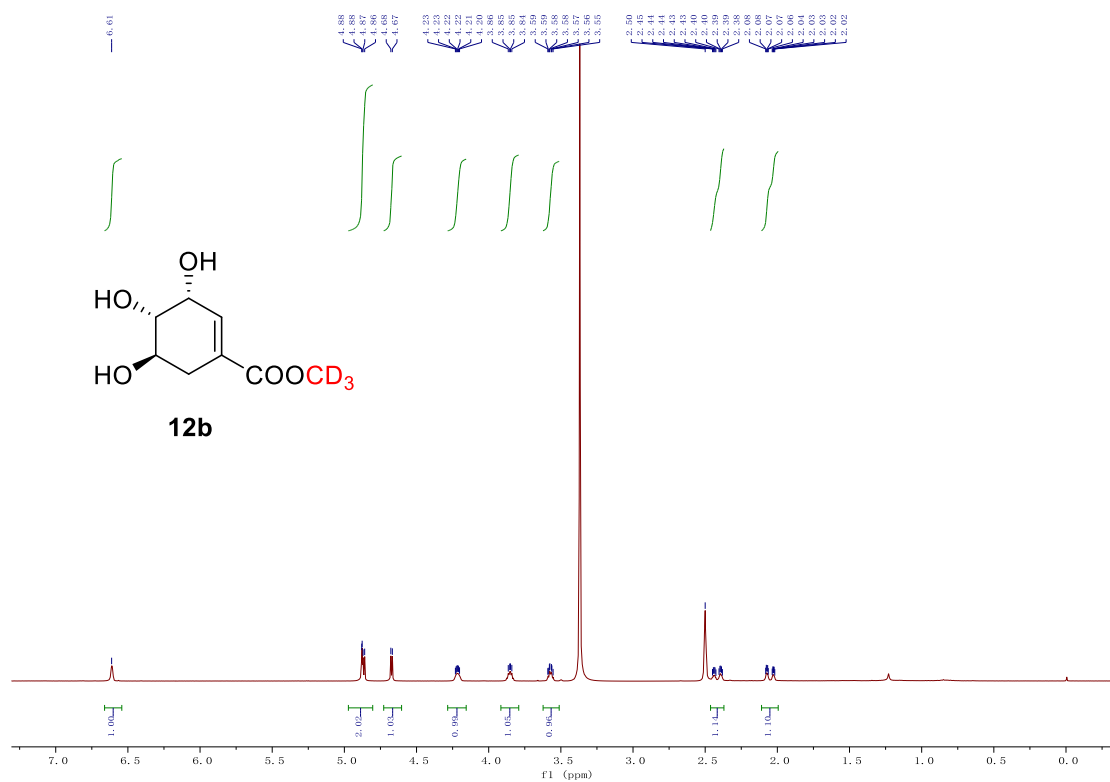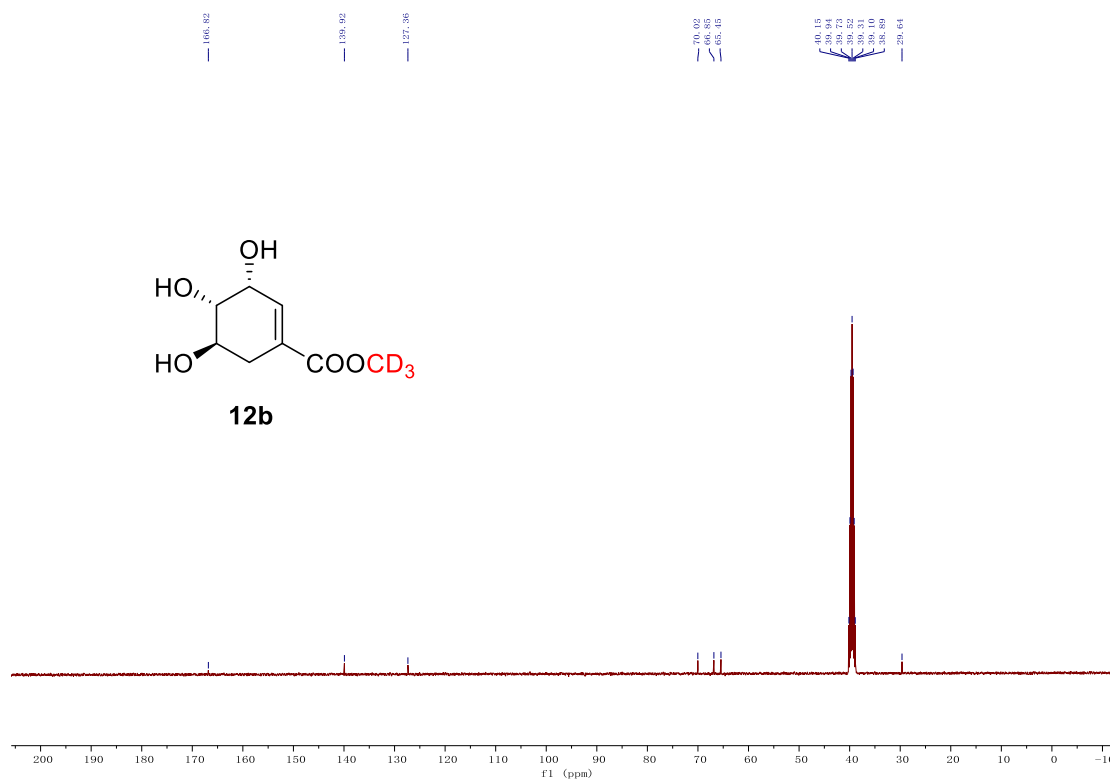

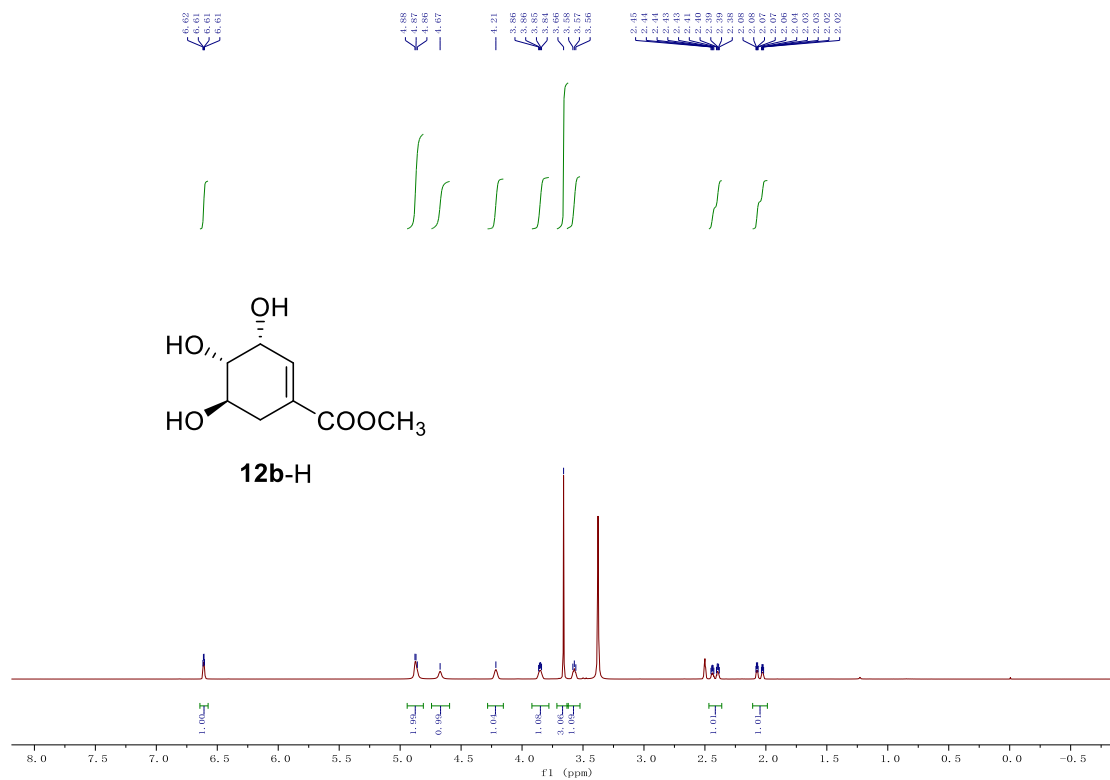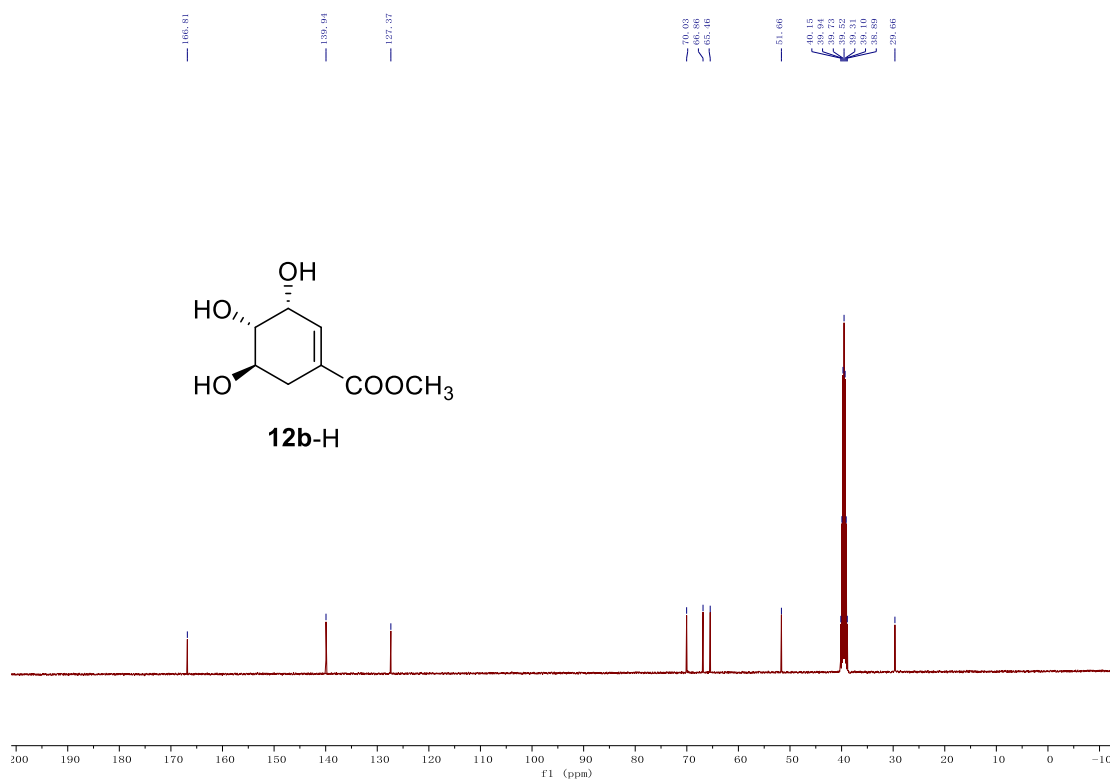

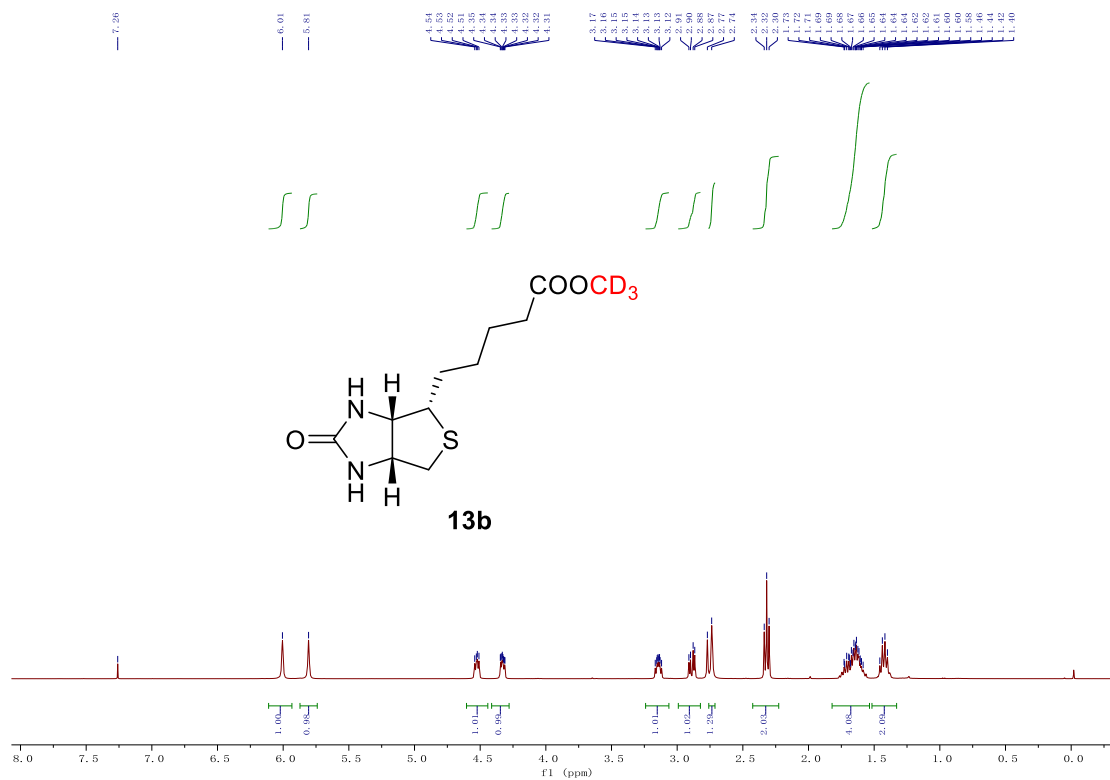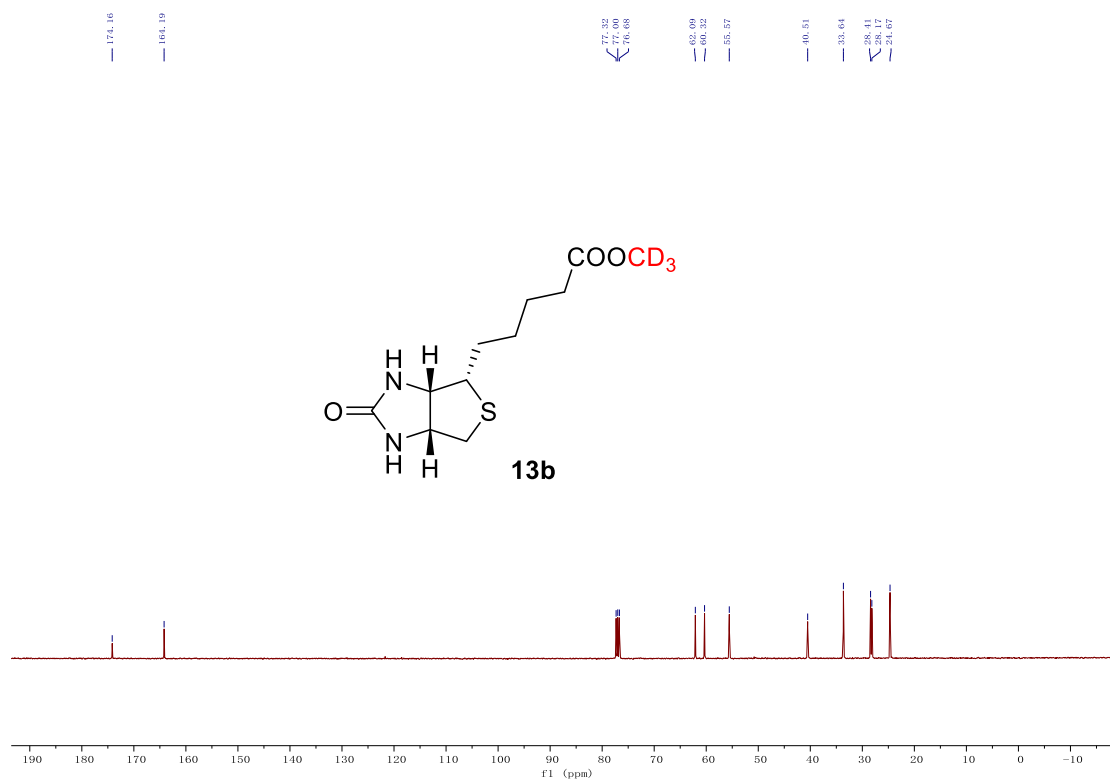

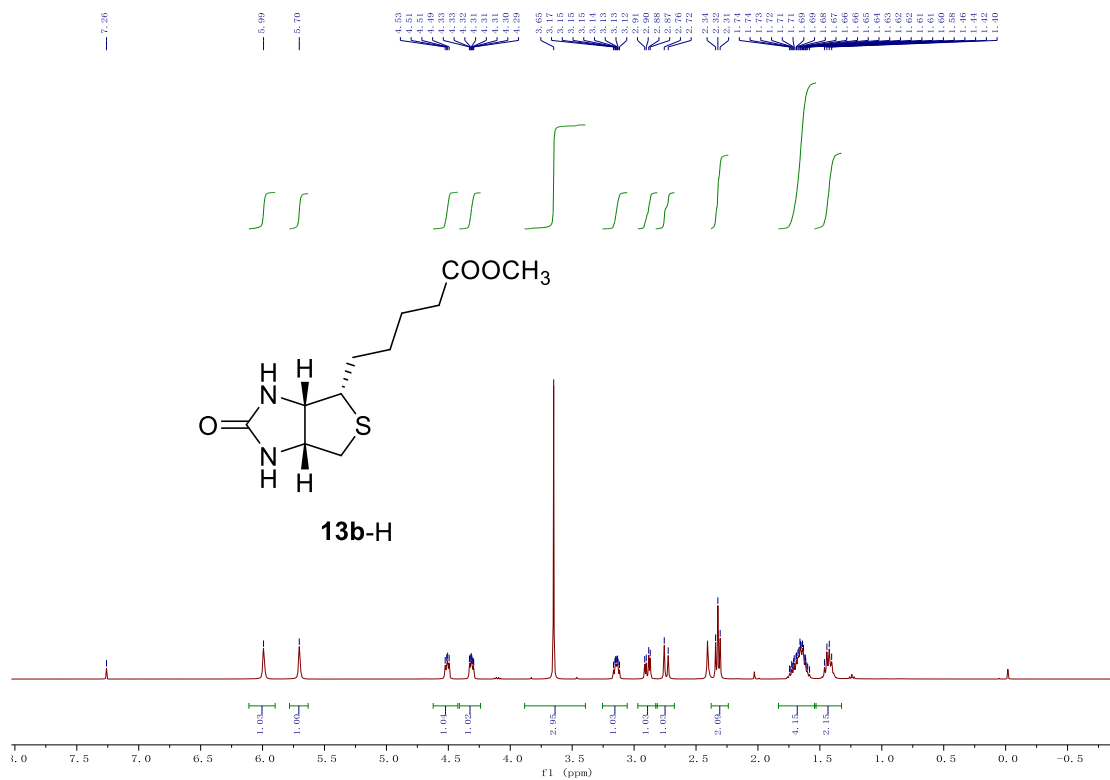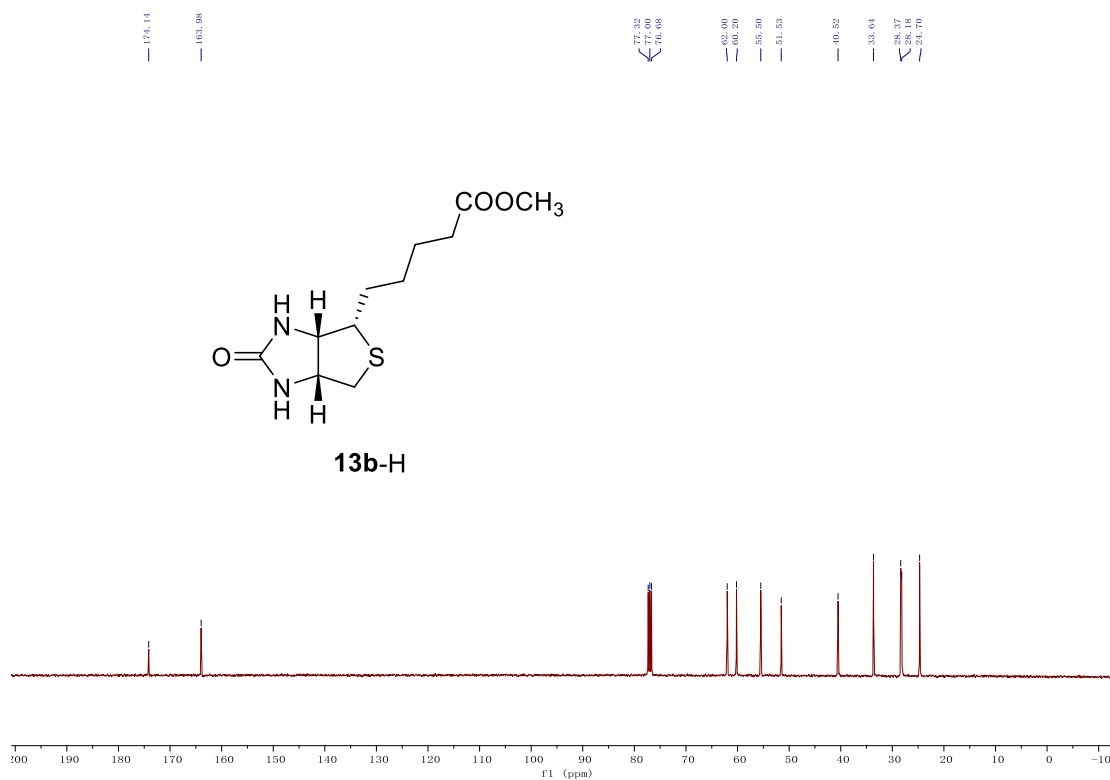

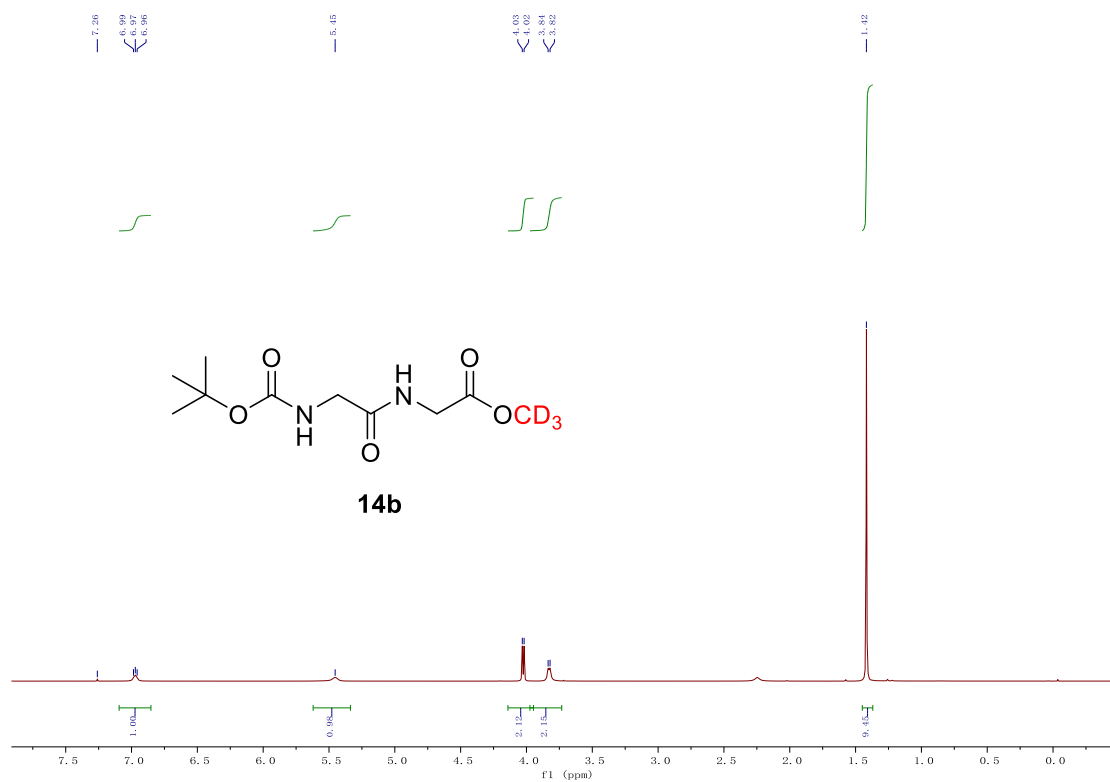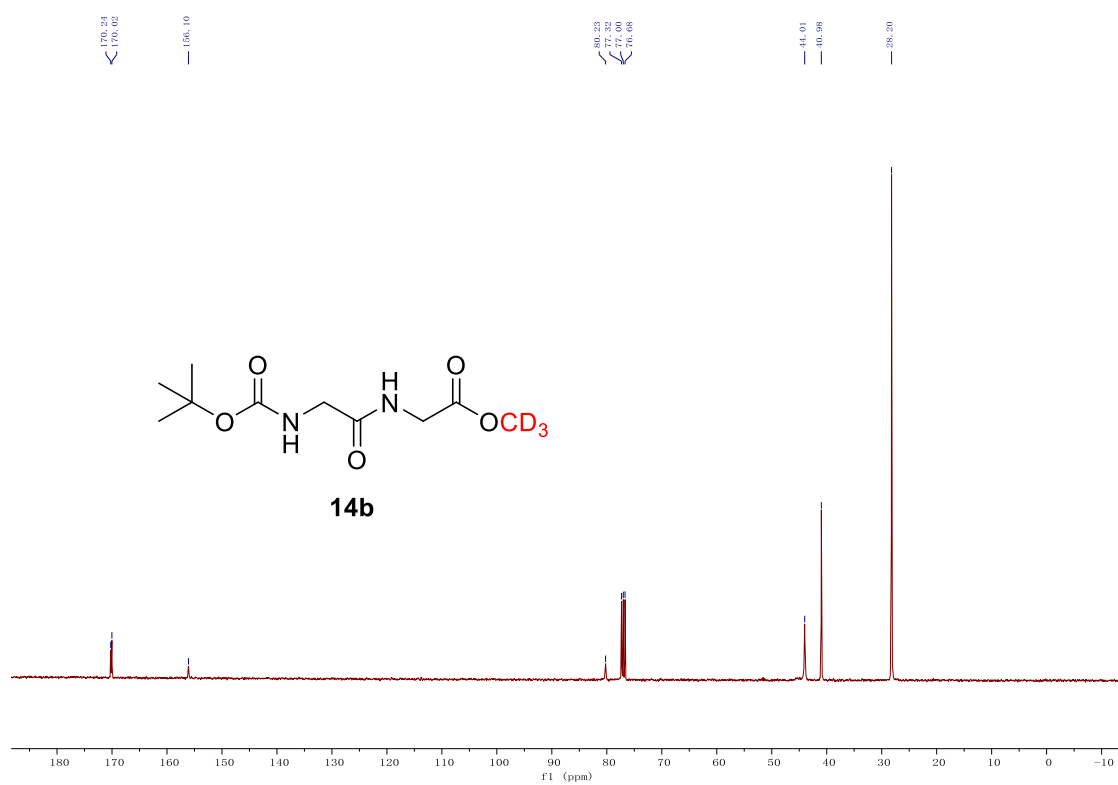

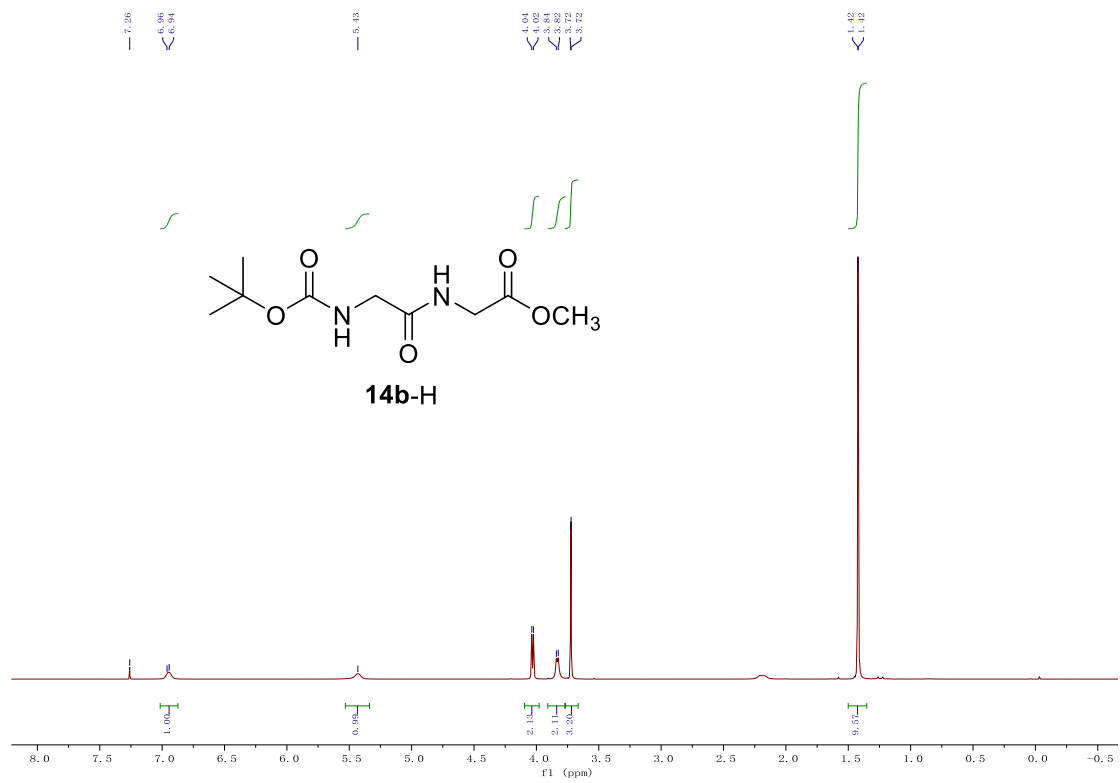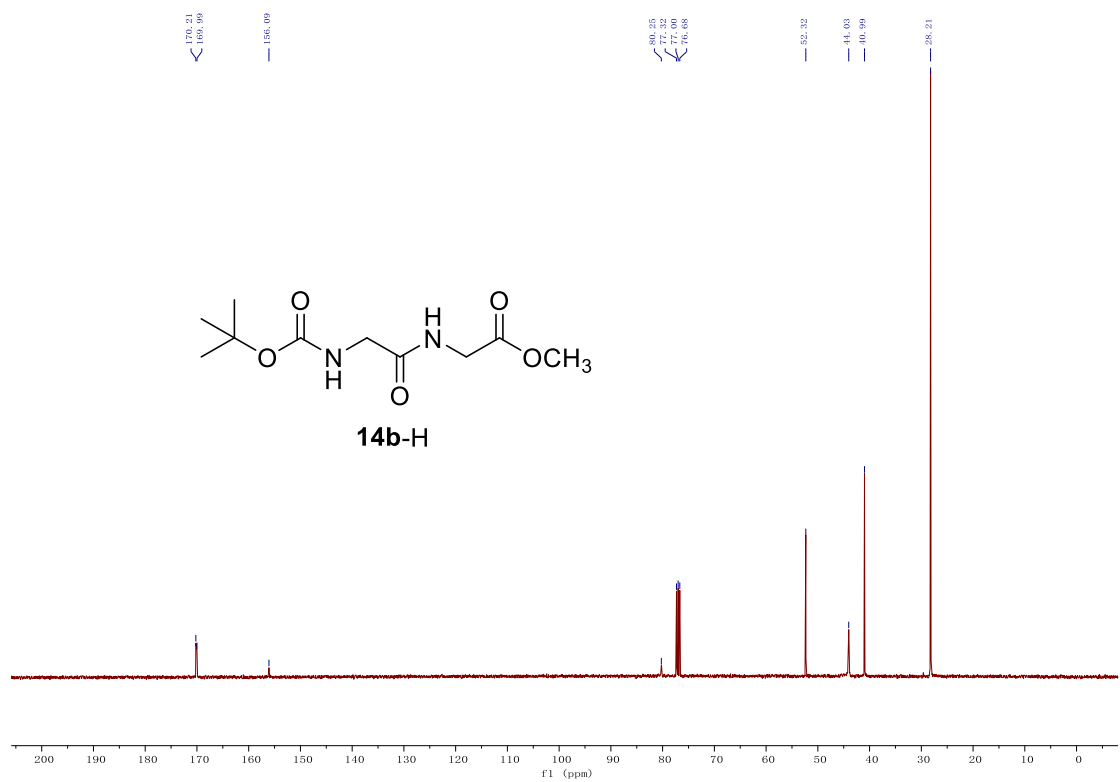

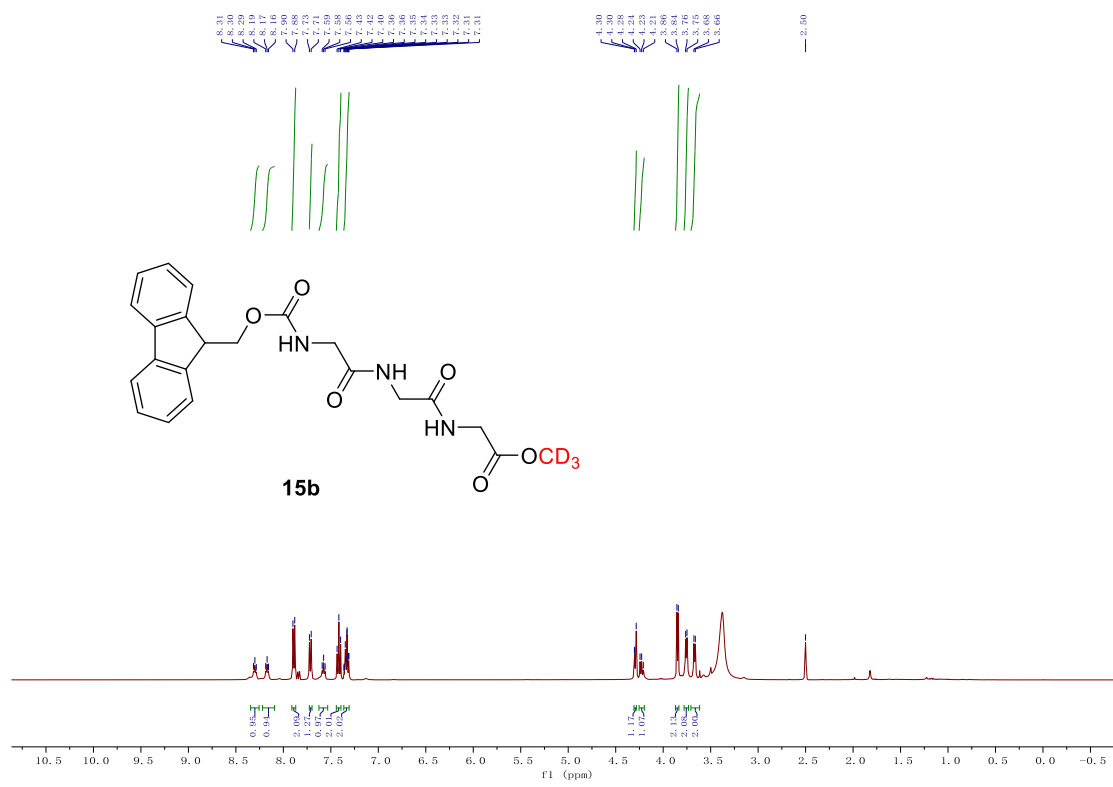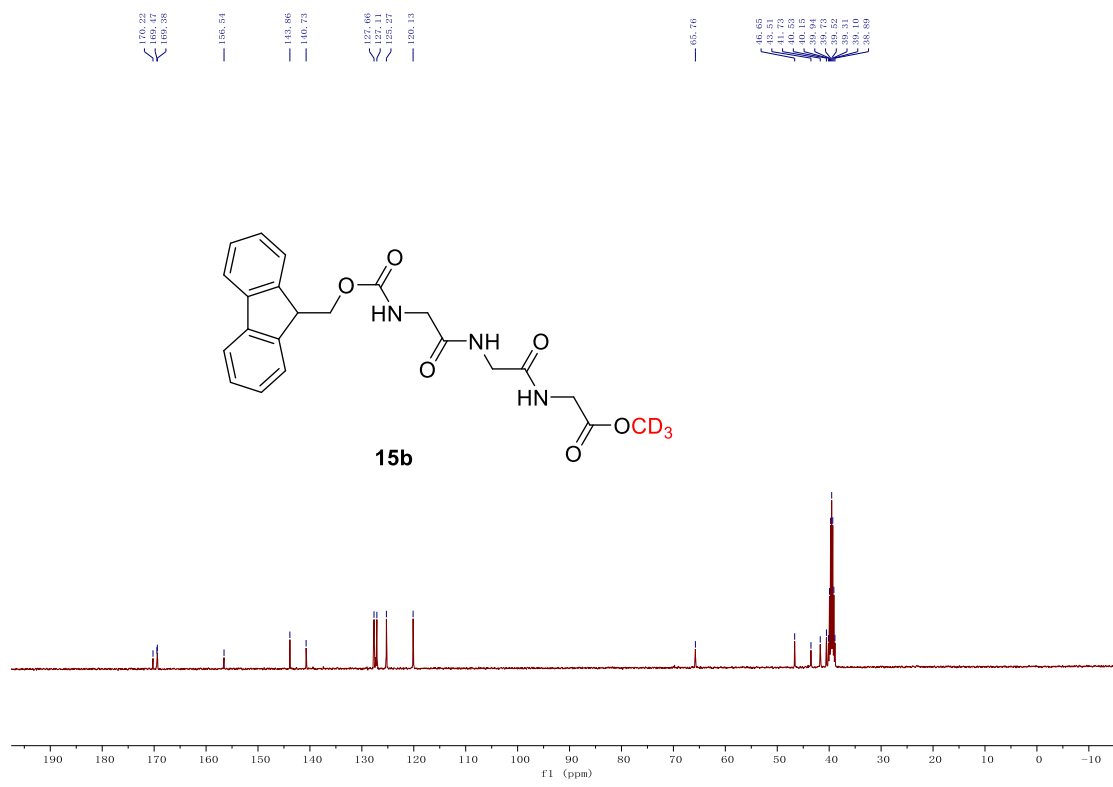

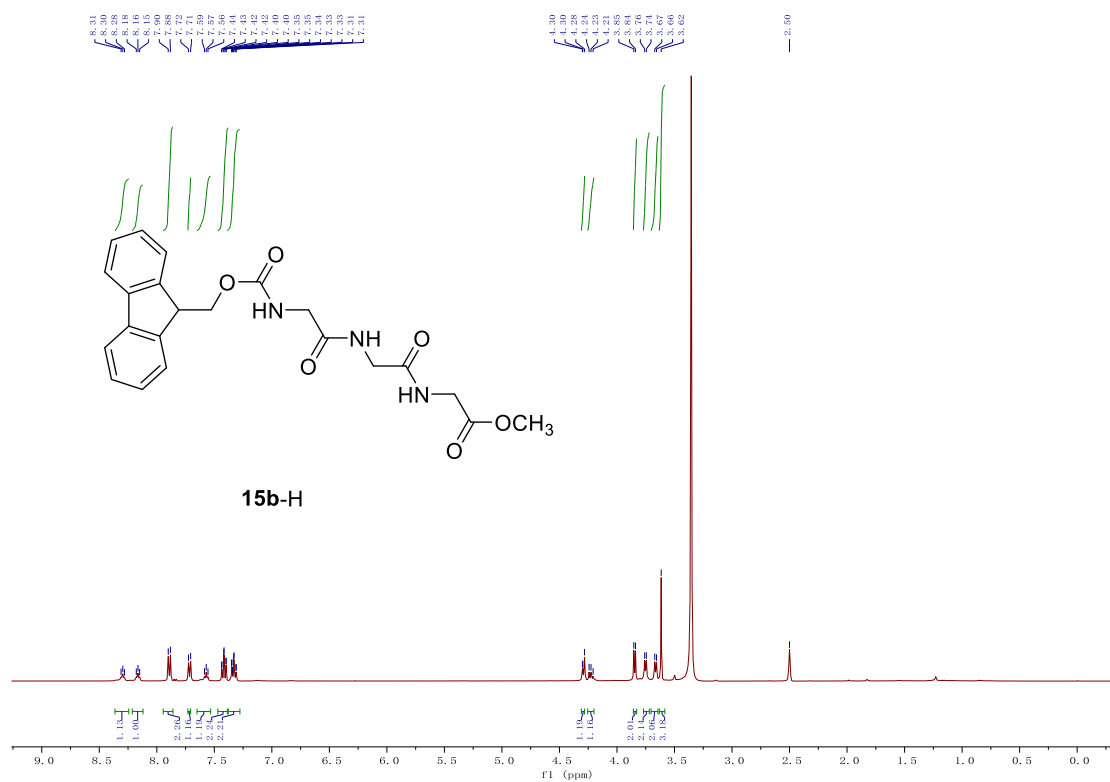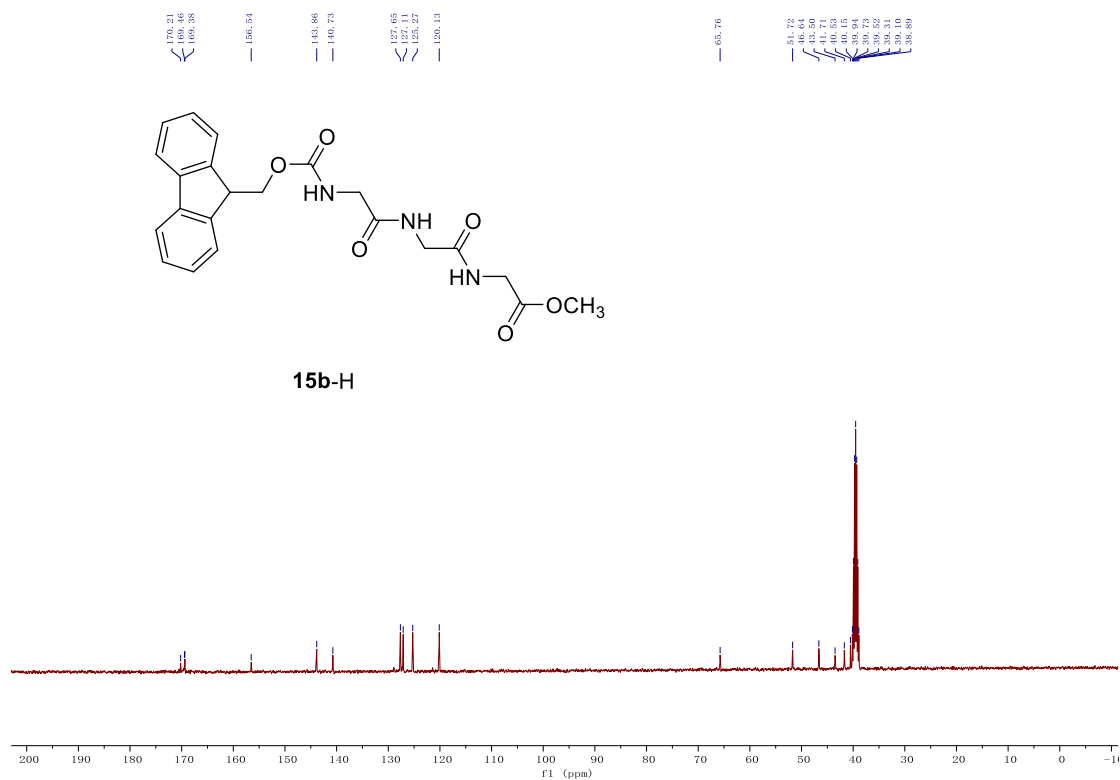



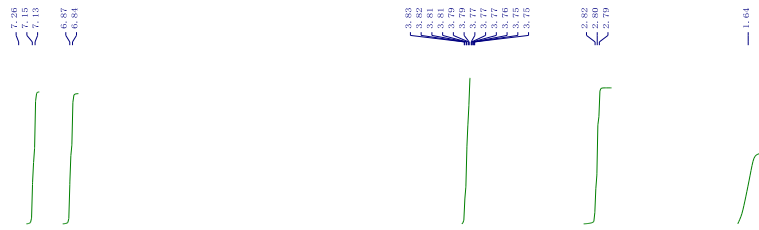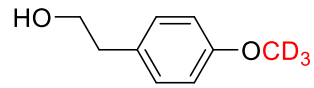

**16b**

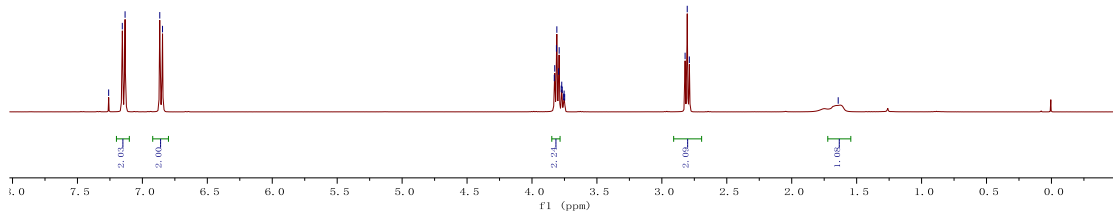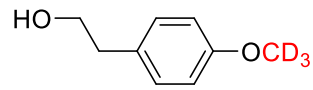

**16b**

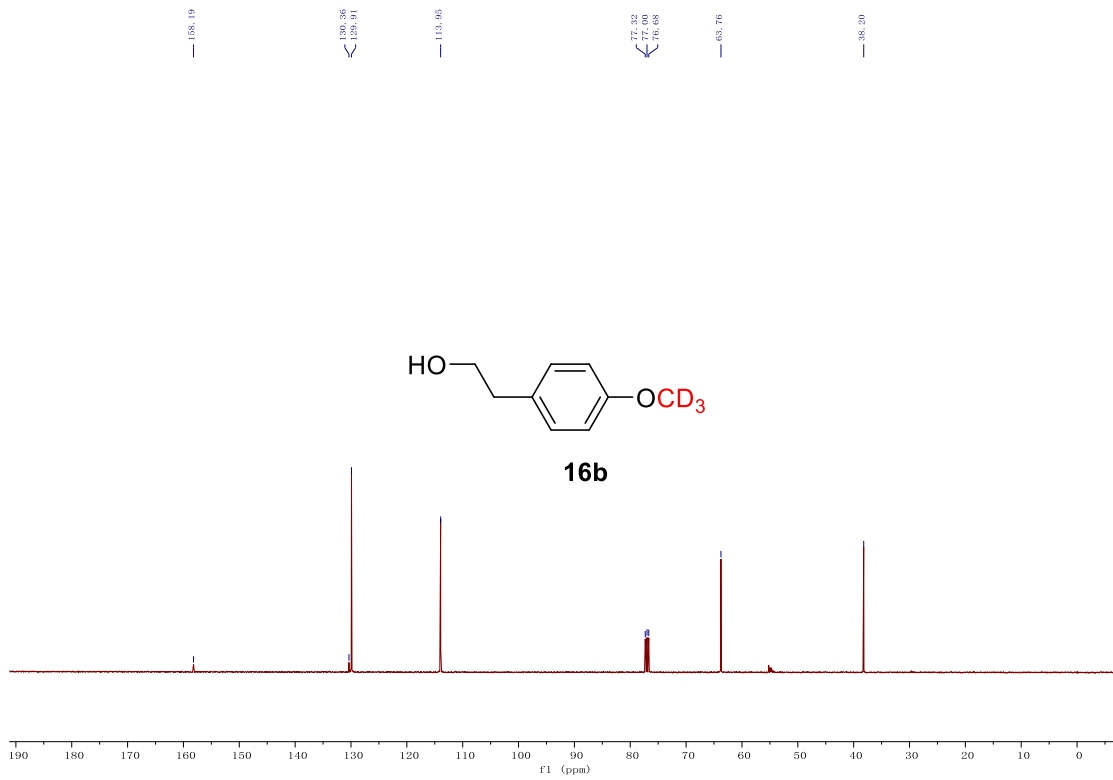

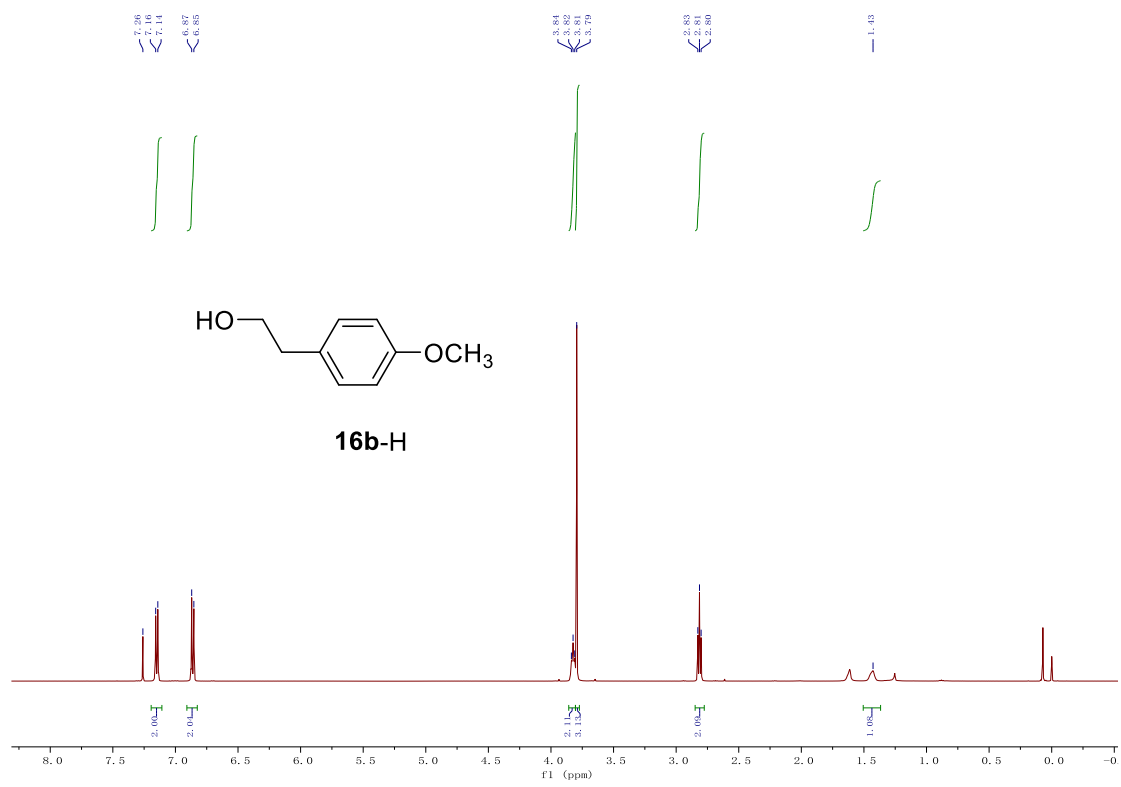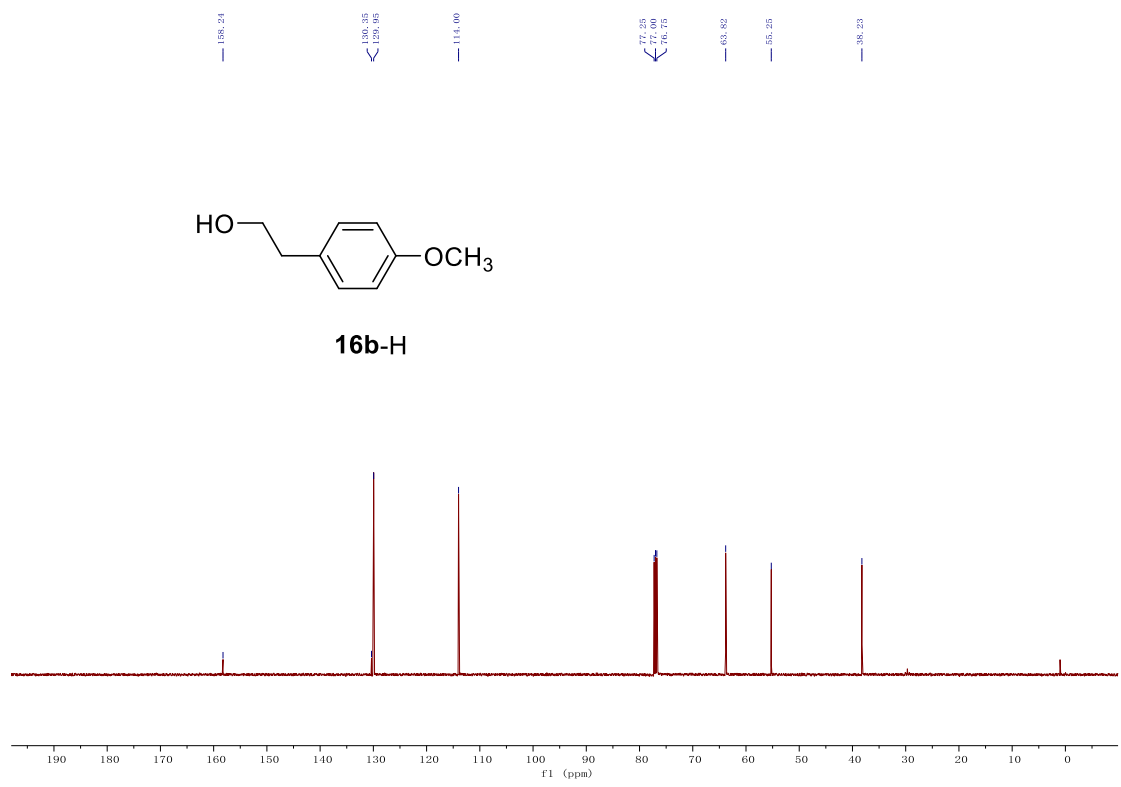

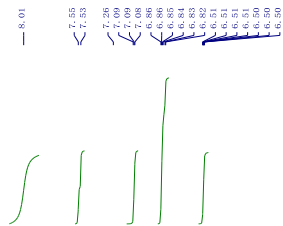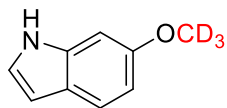

**17b**

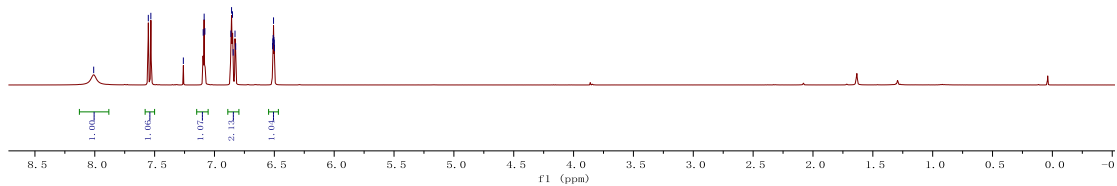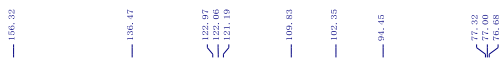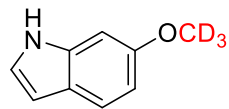

**17b**

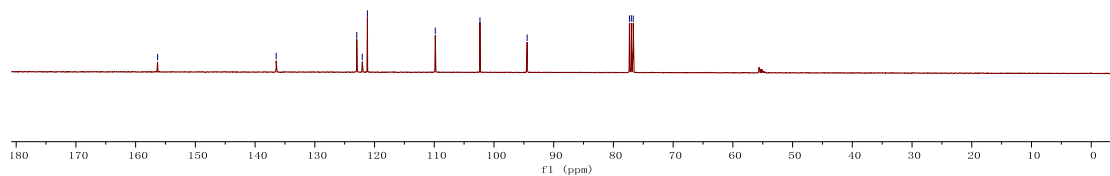

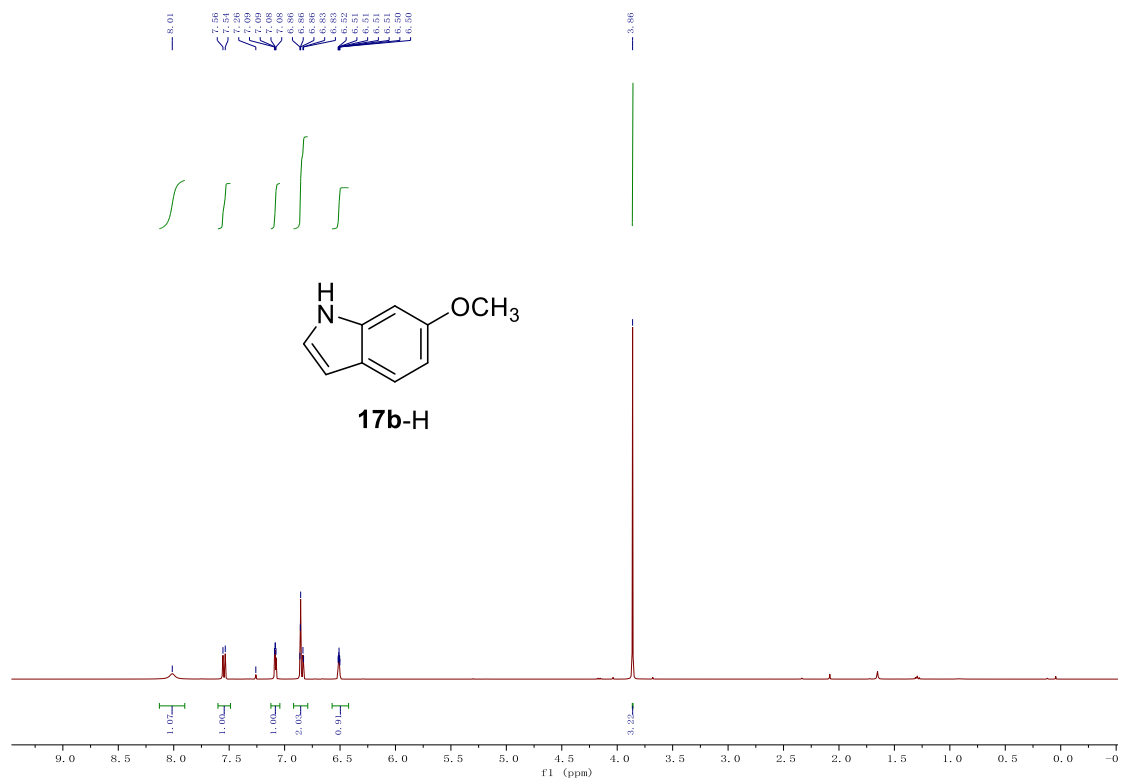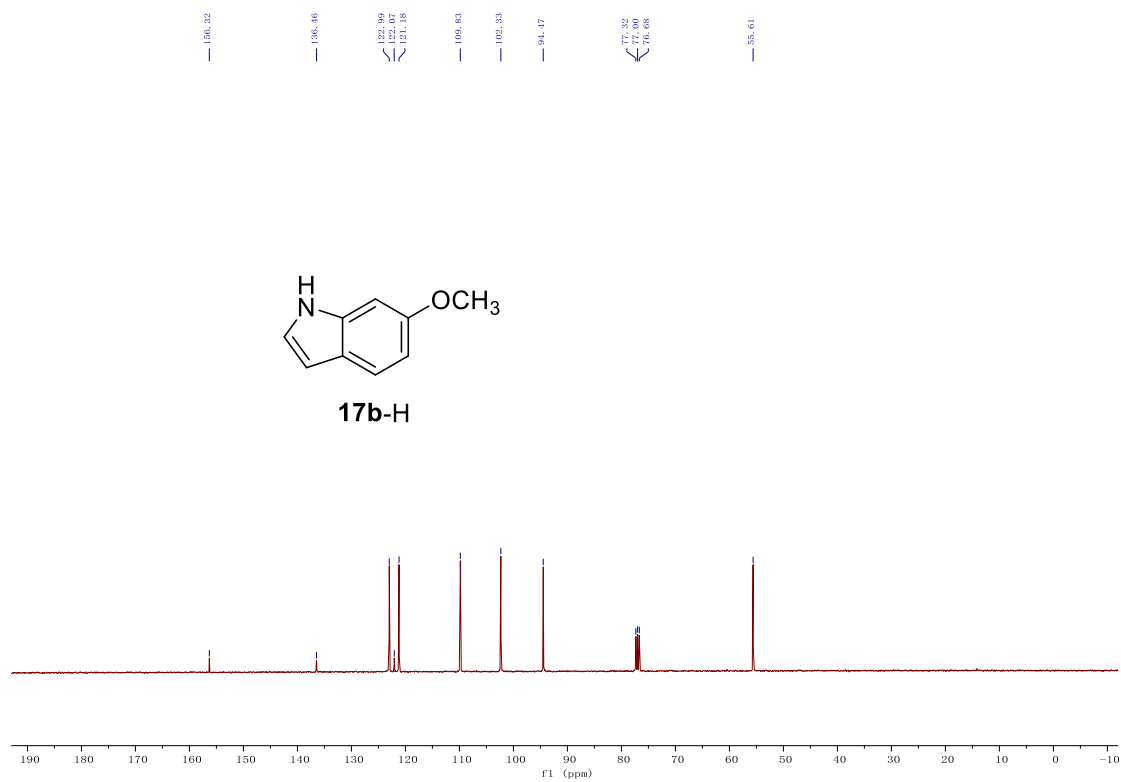

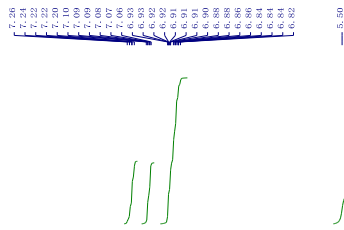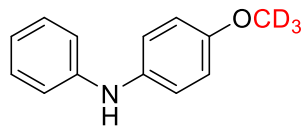

18b

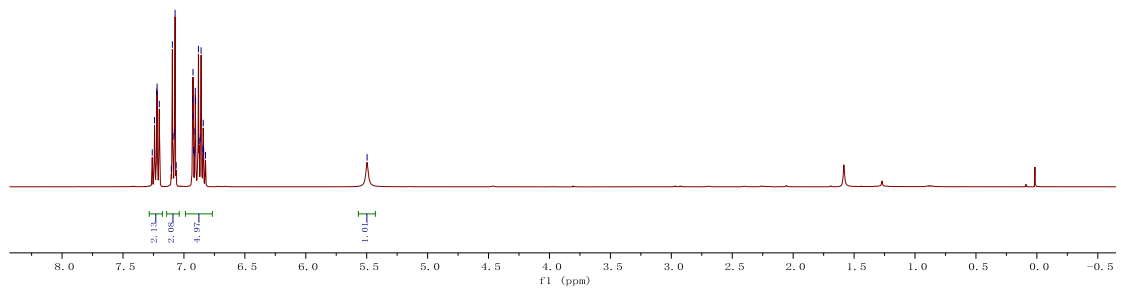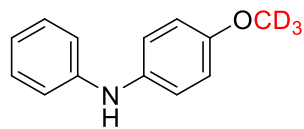

18b

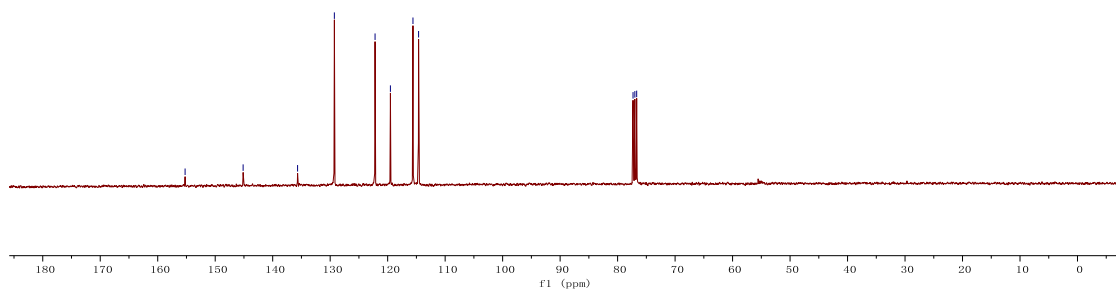

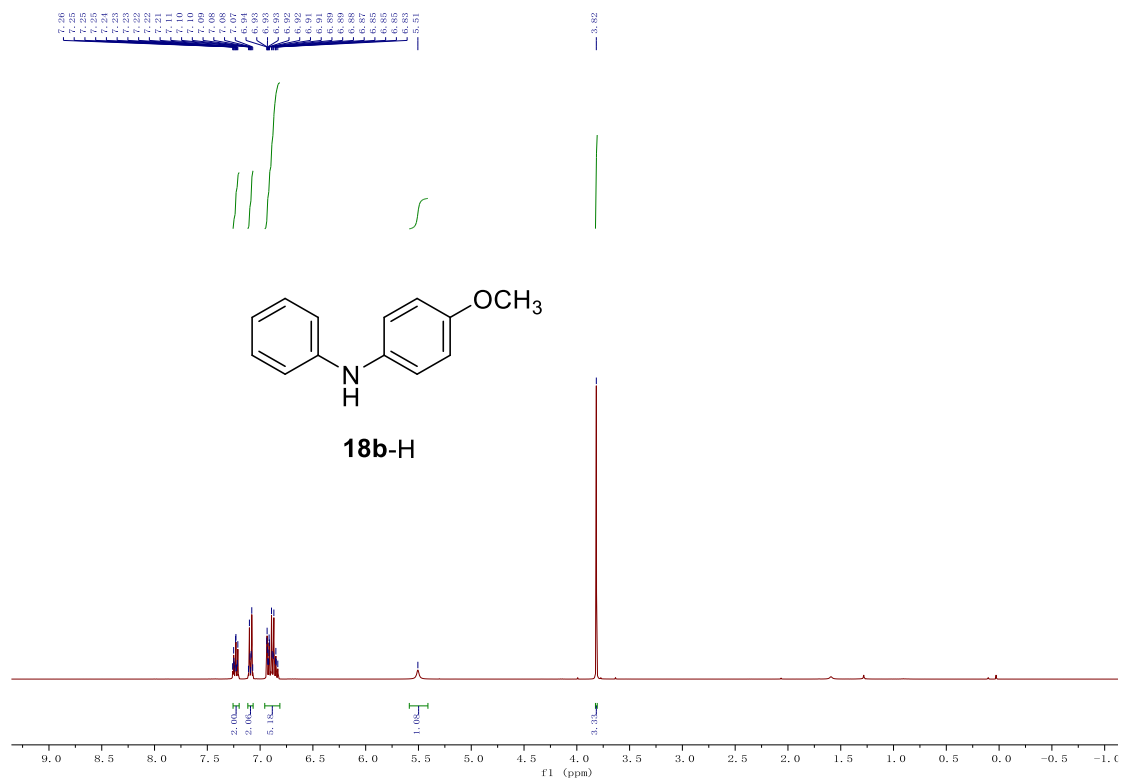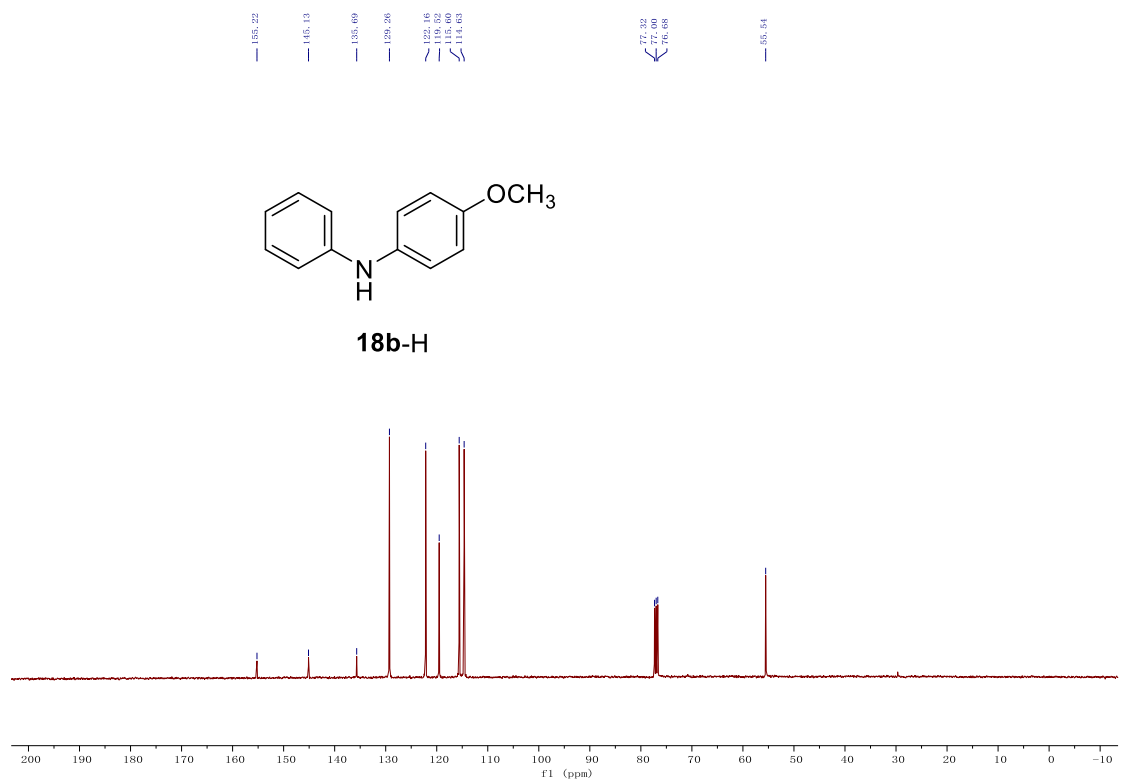

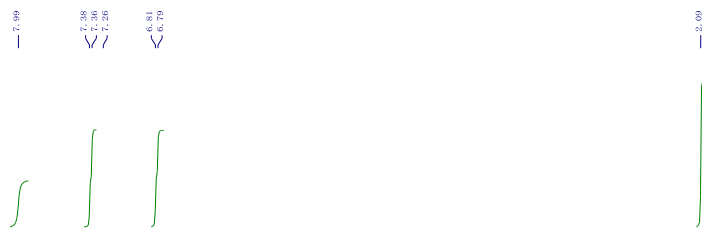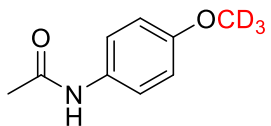

**19b**

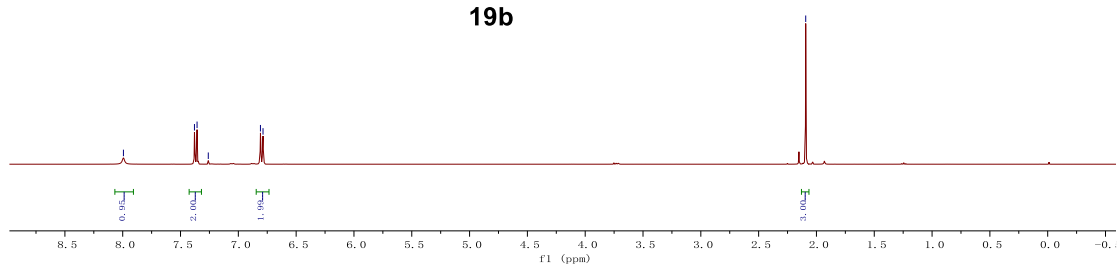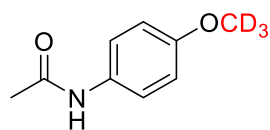

**19b**

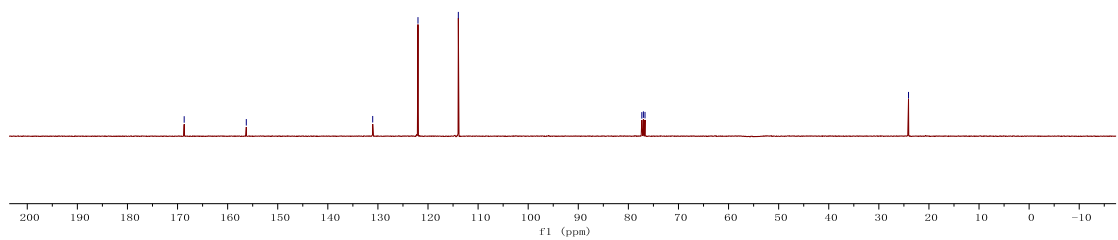

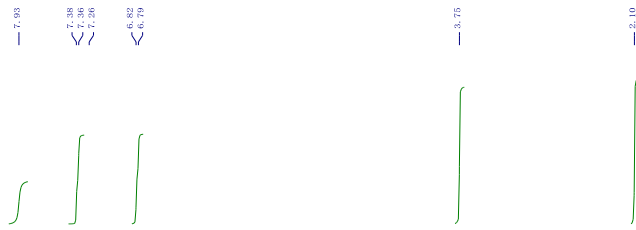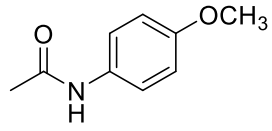

**19b-H**

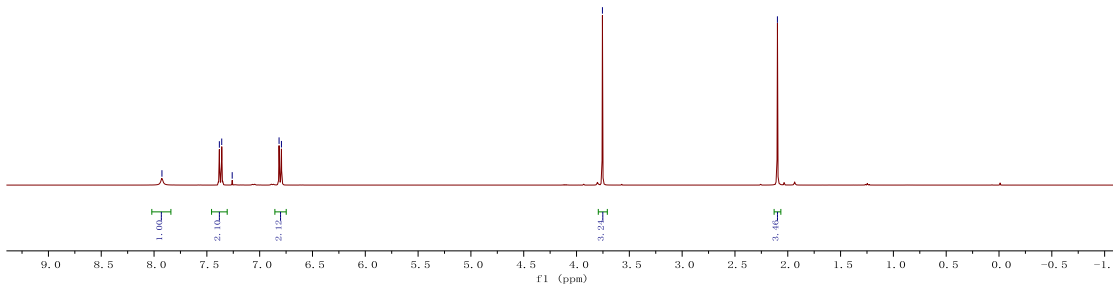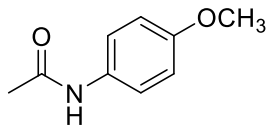

**19b-H**

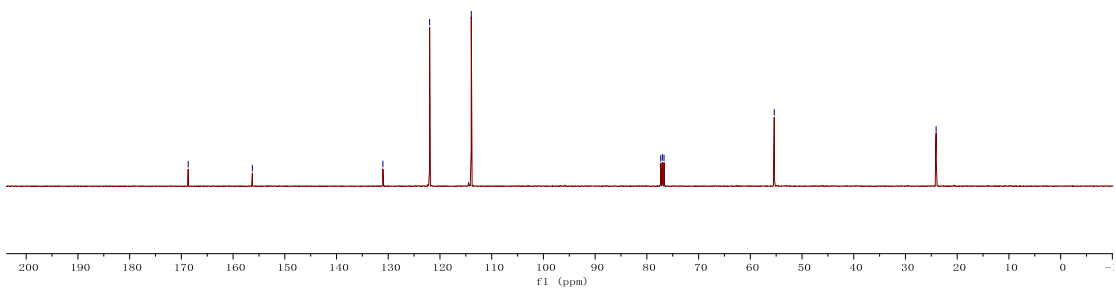



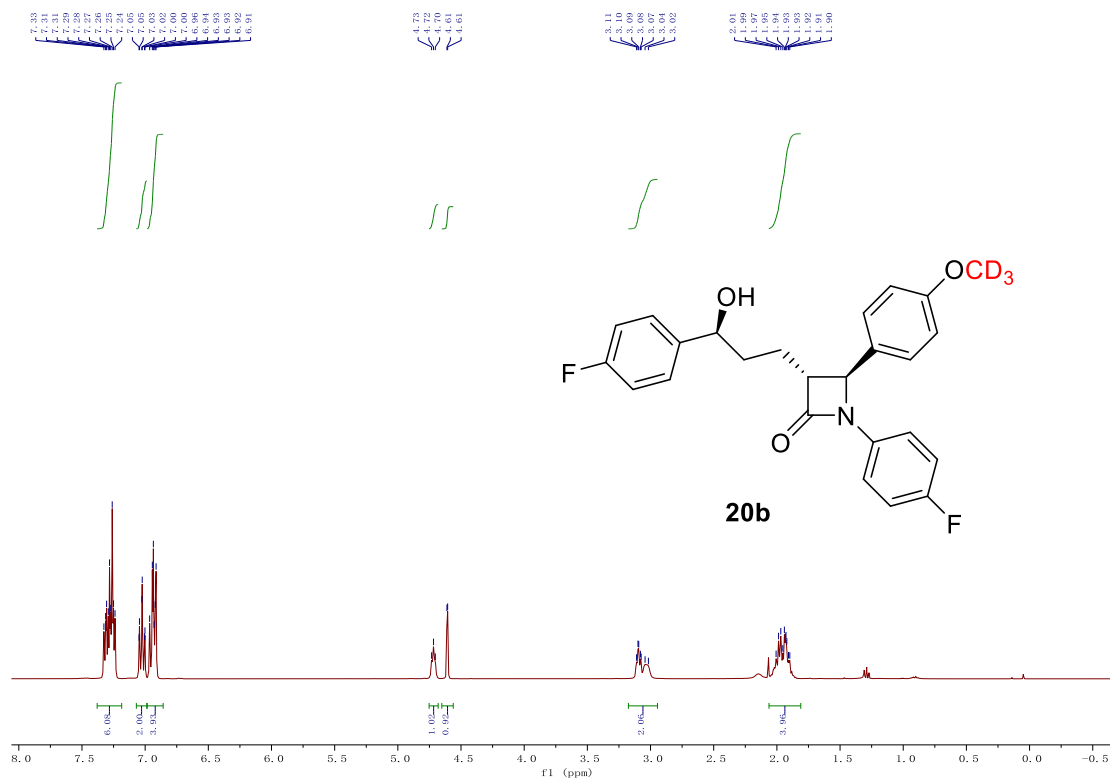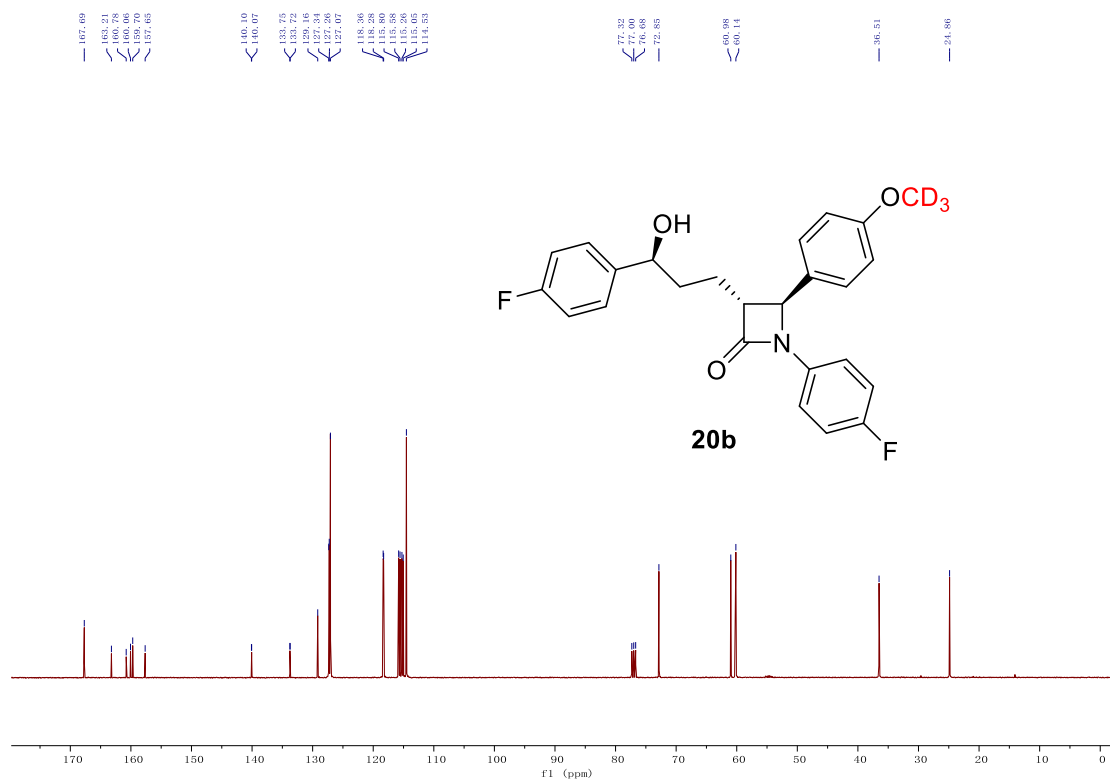

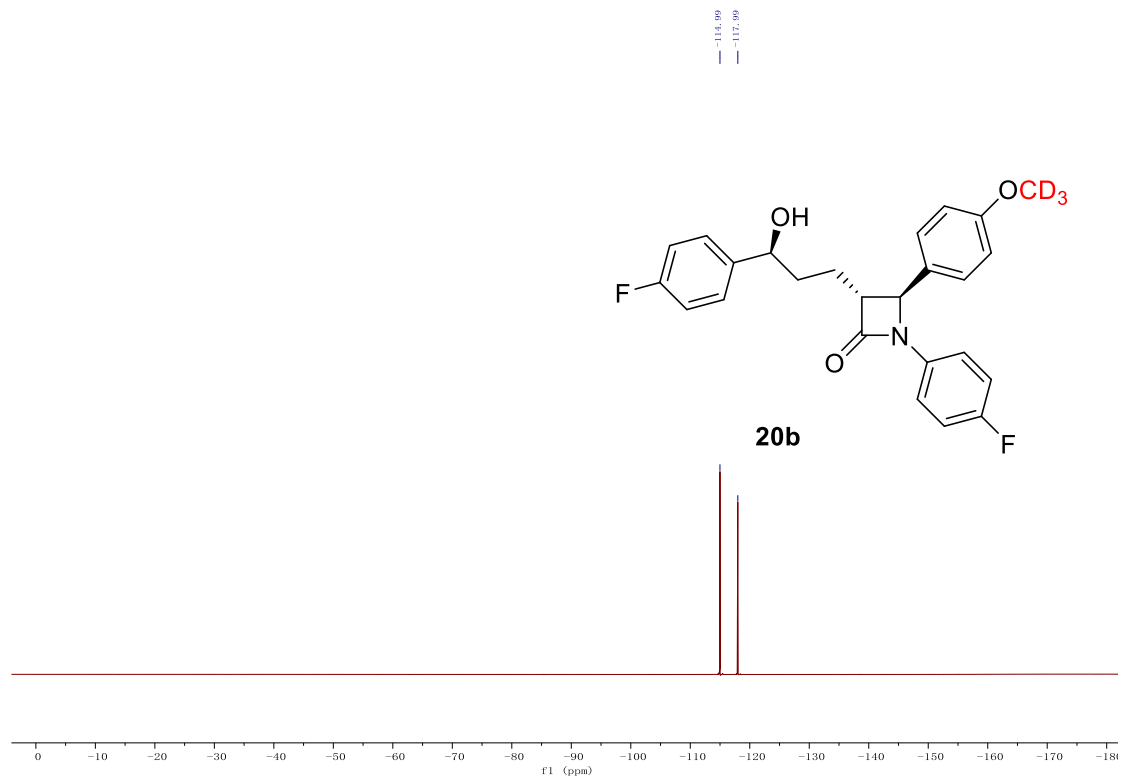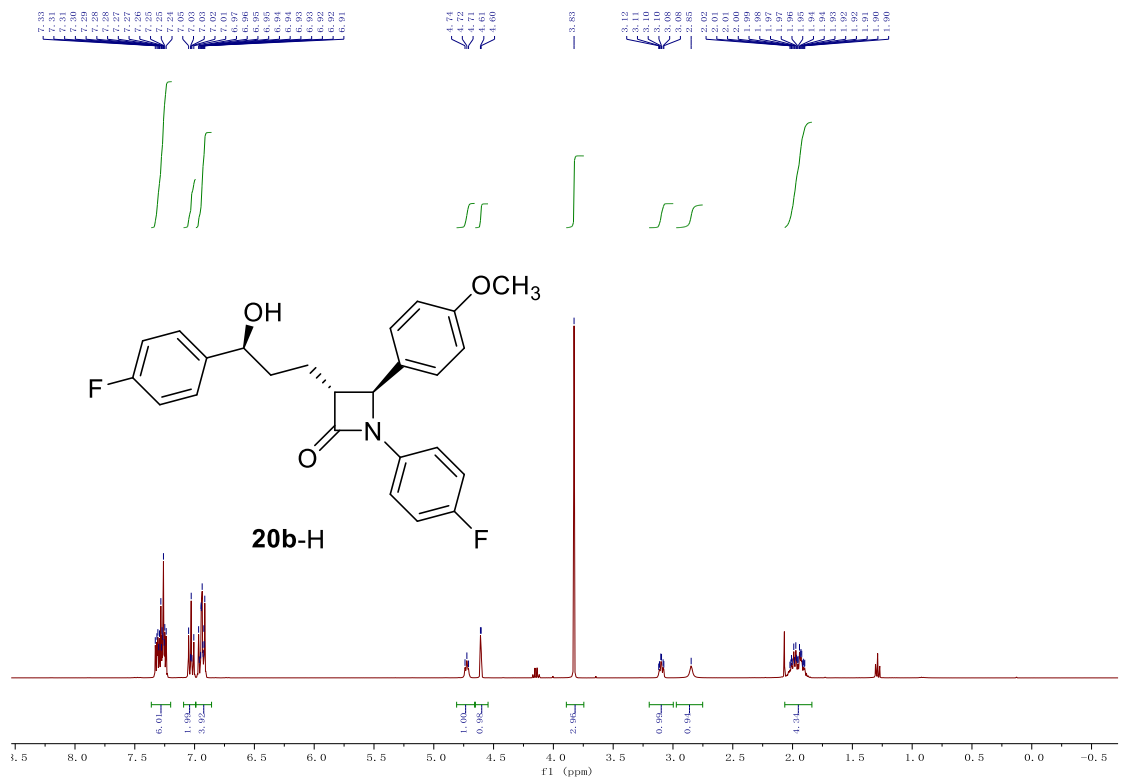

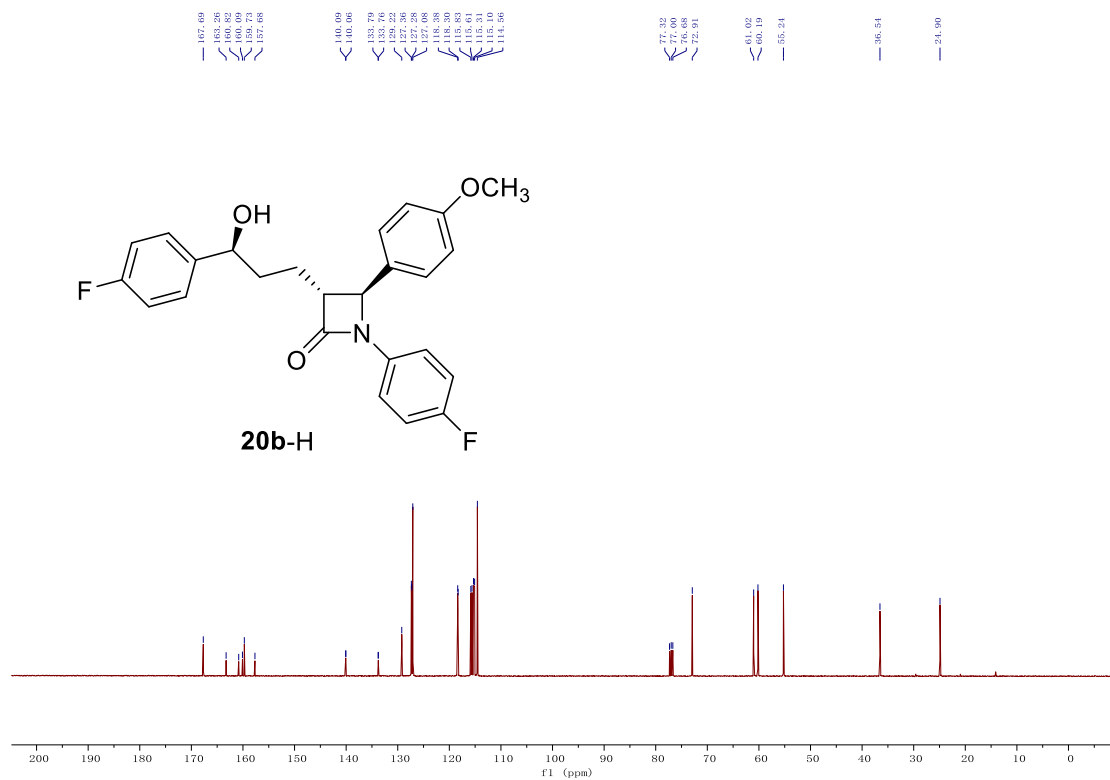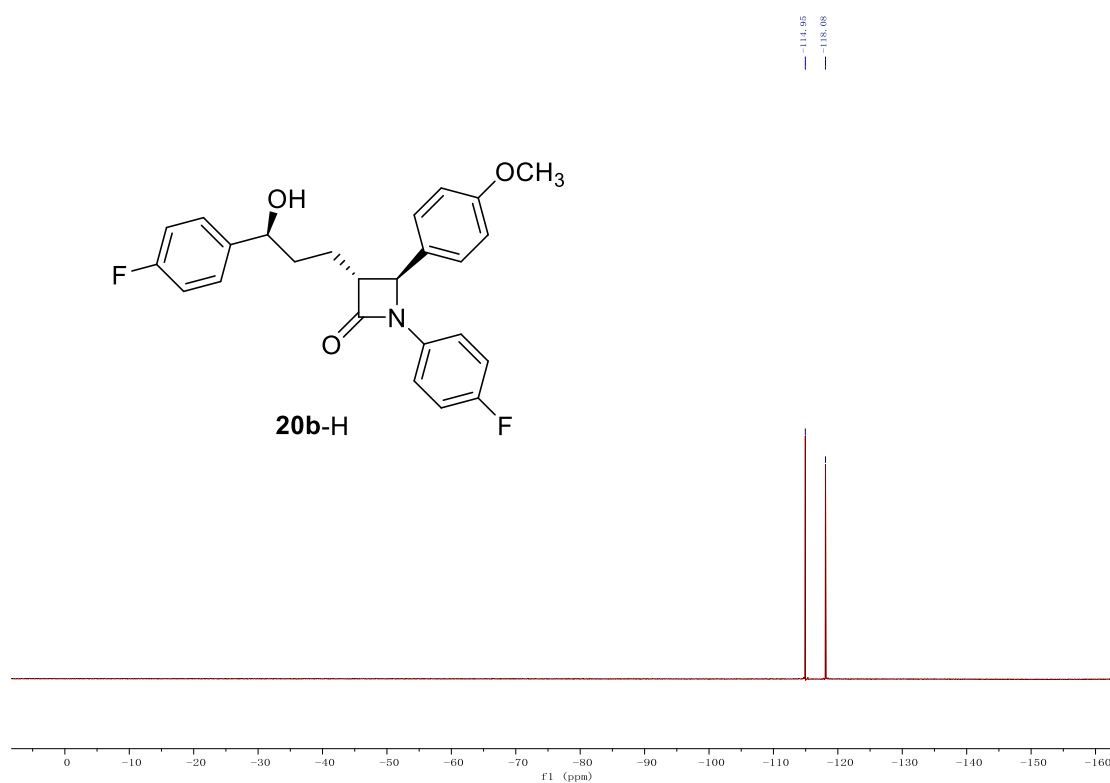

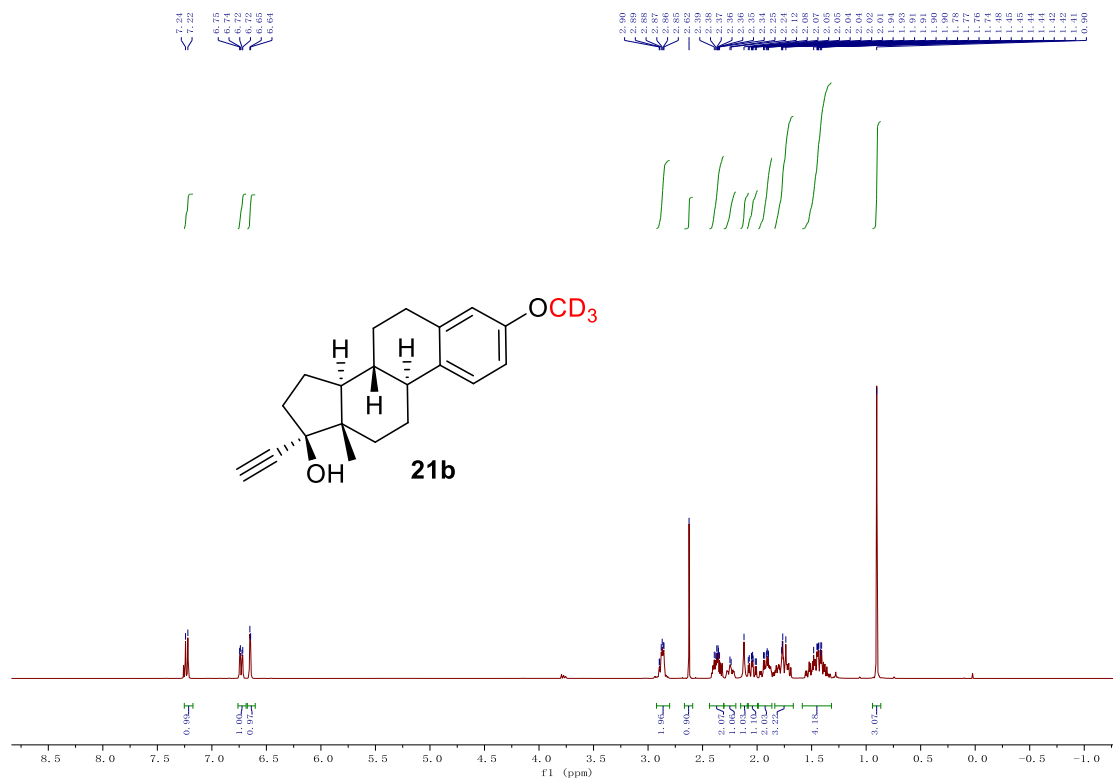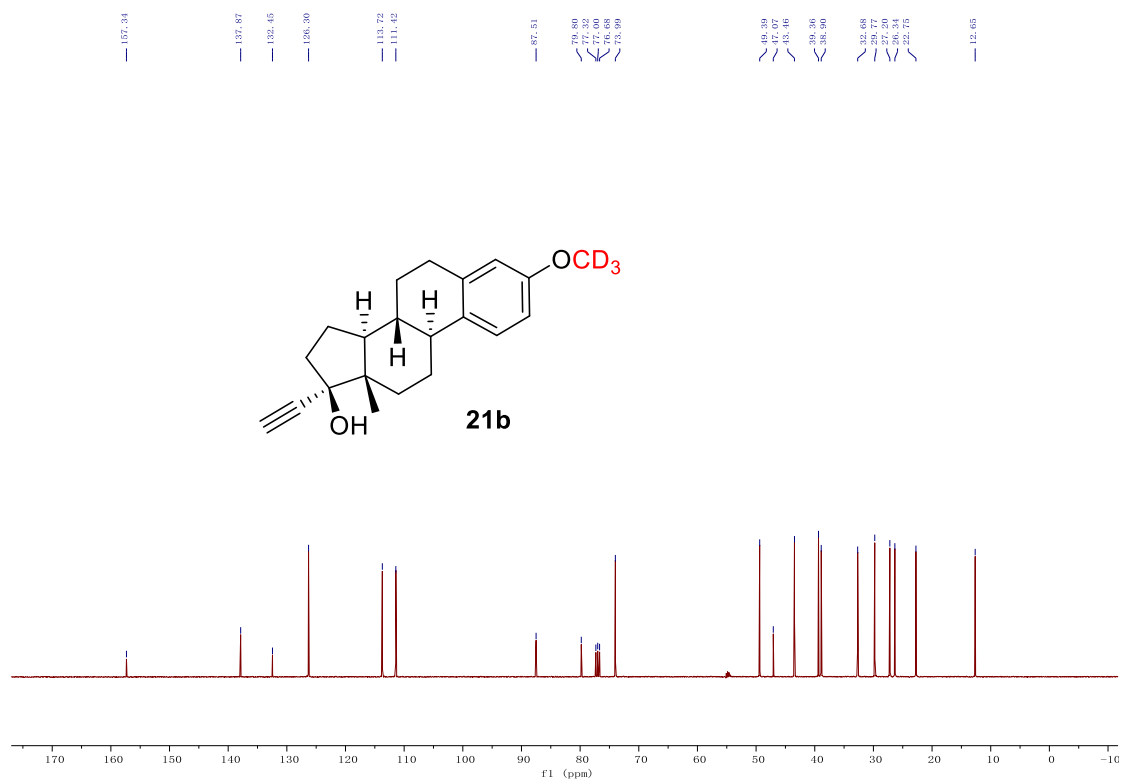

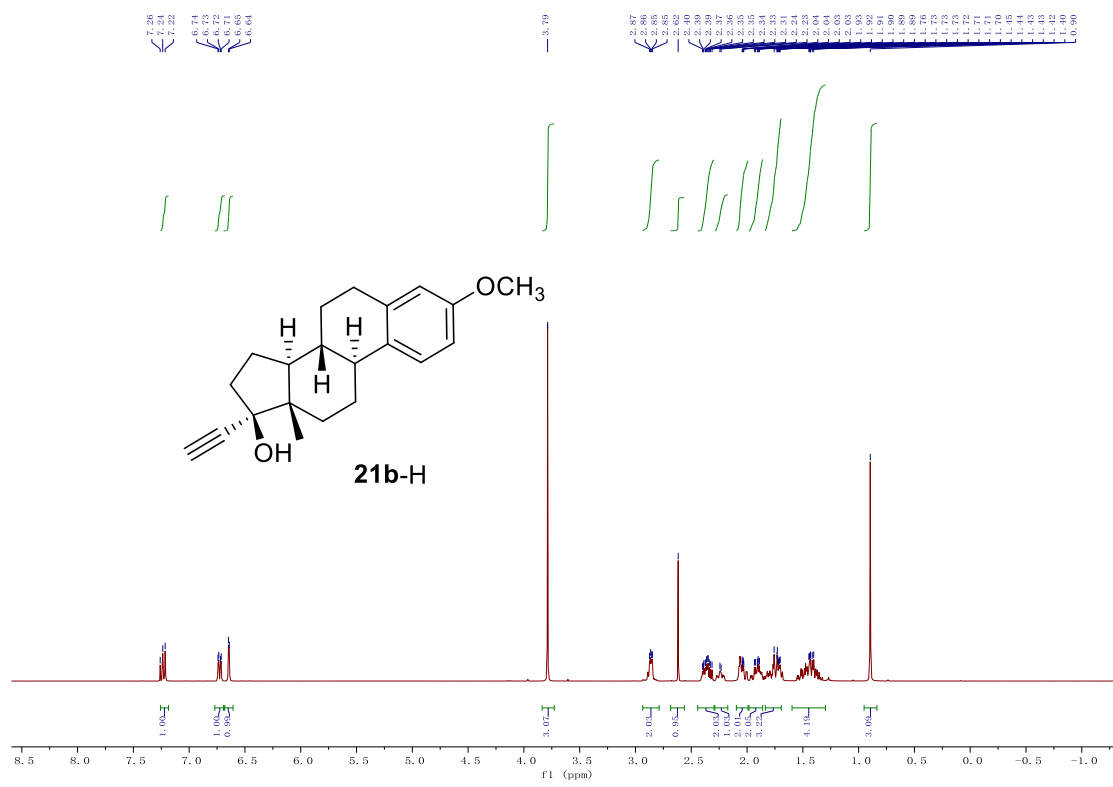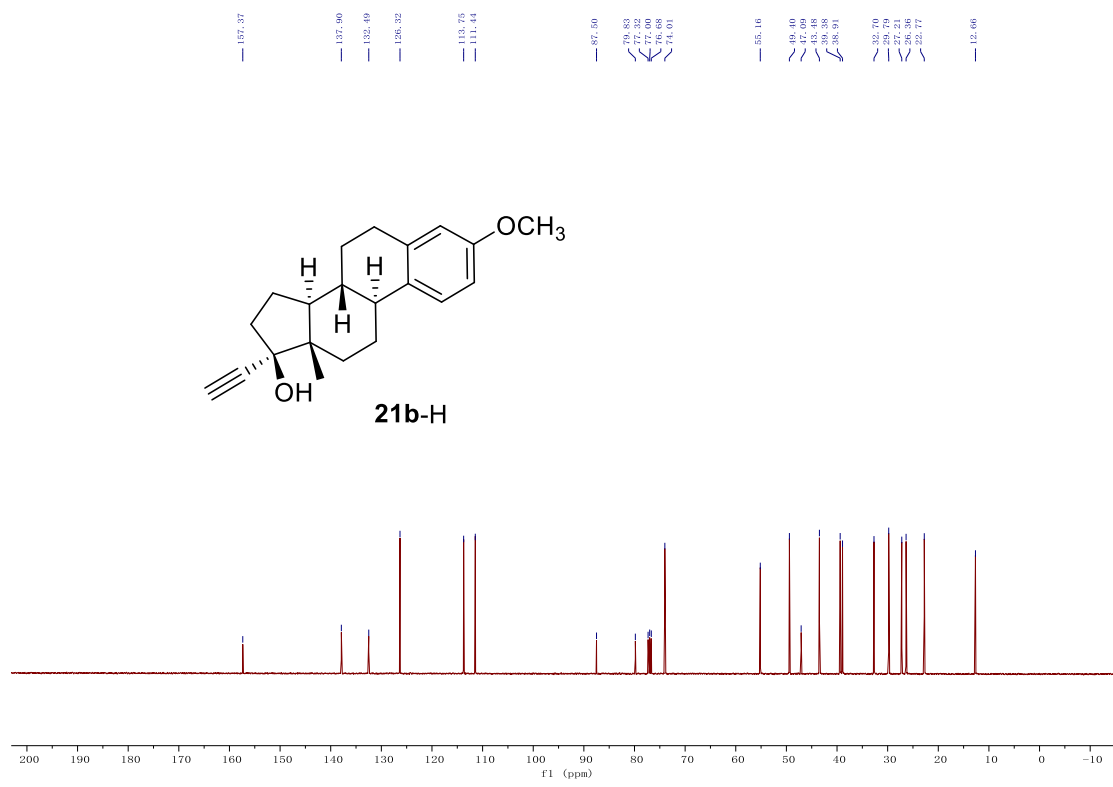

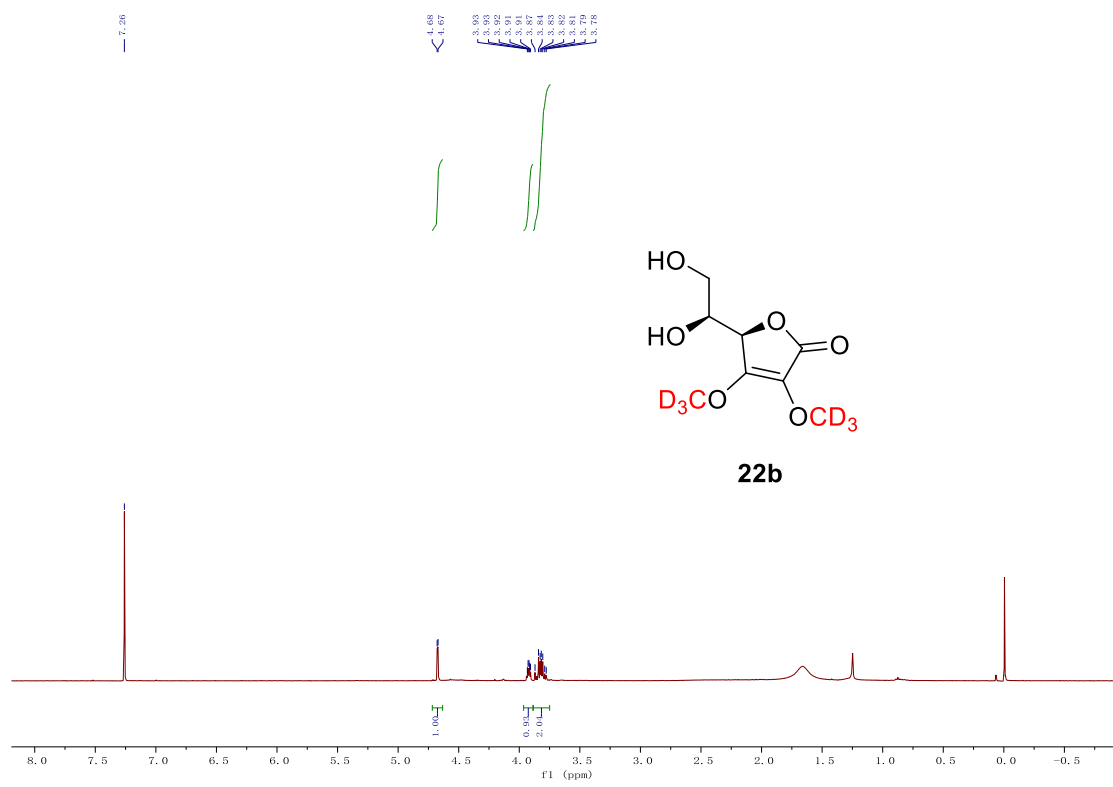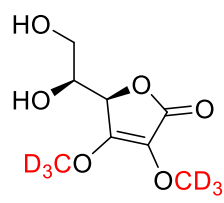

**22b**

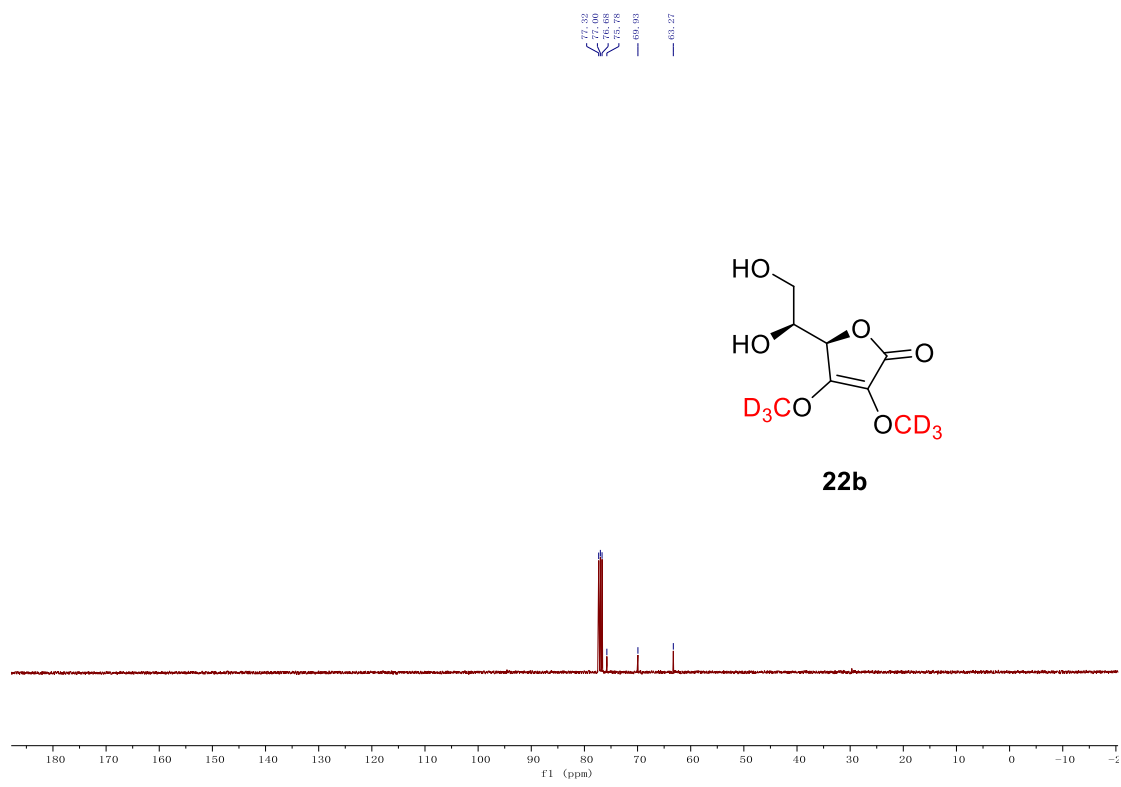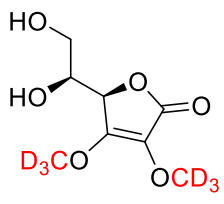

**22b**

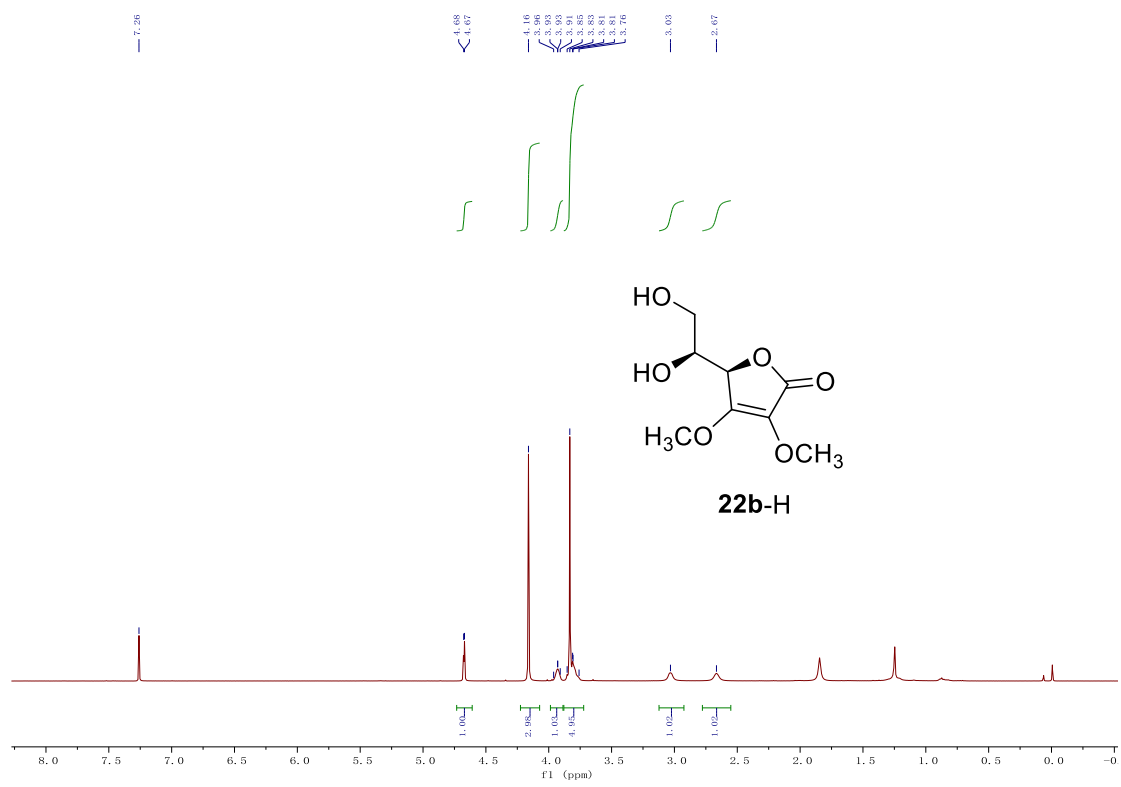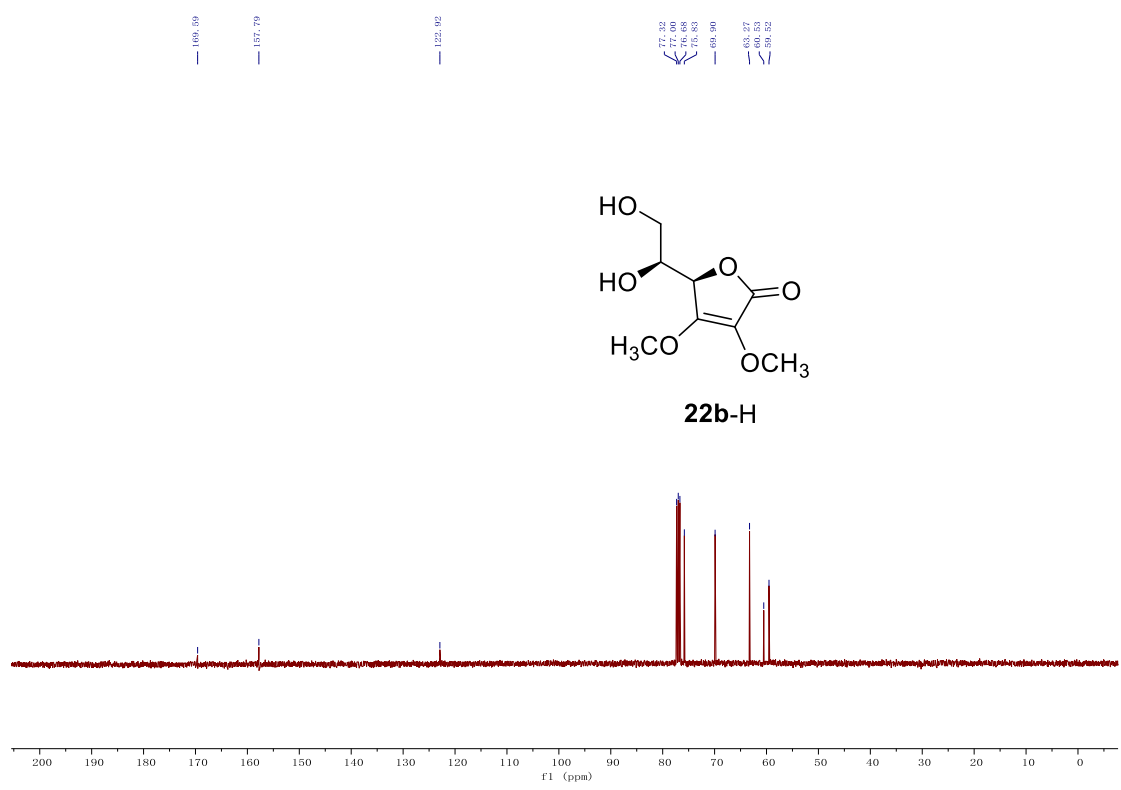

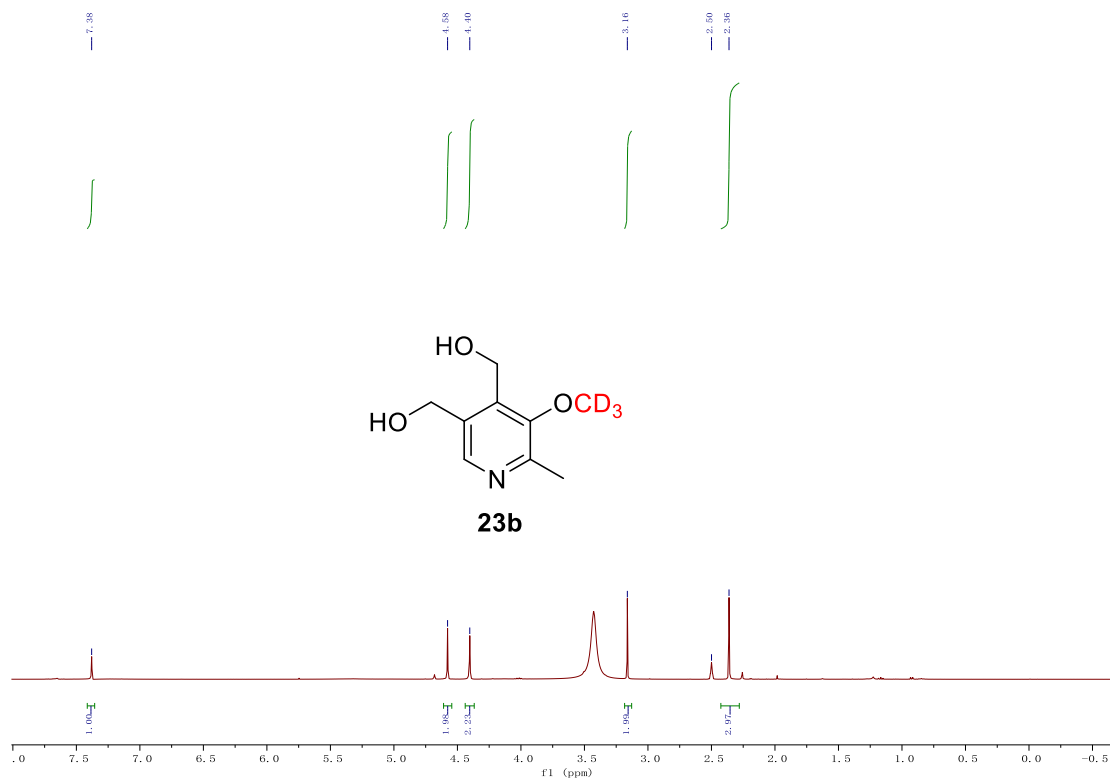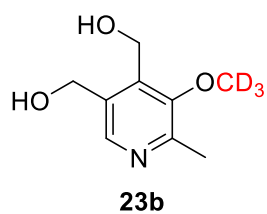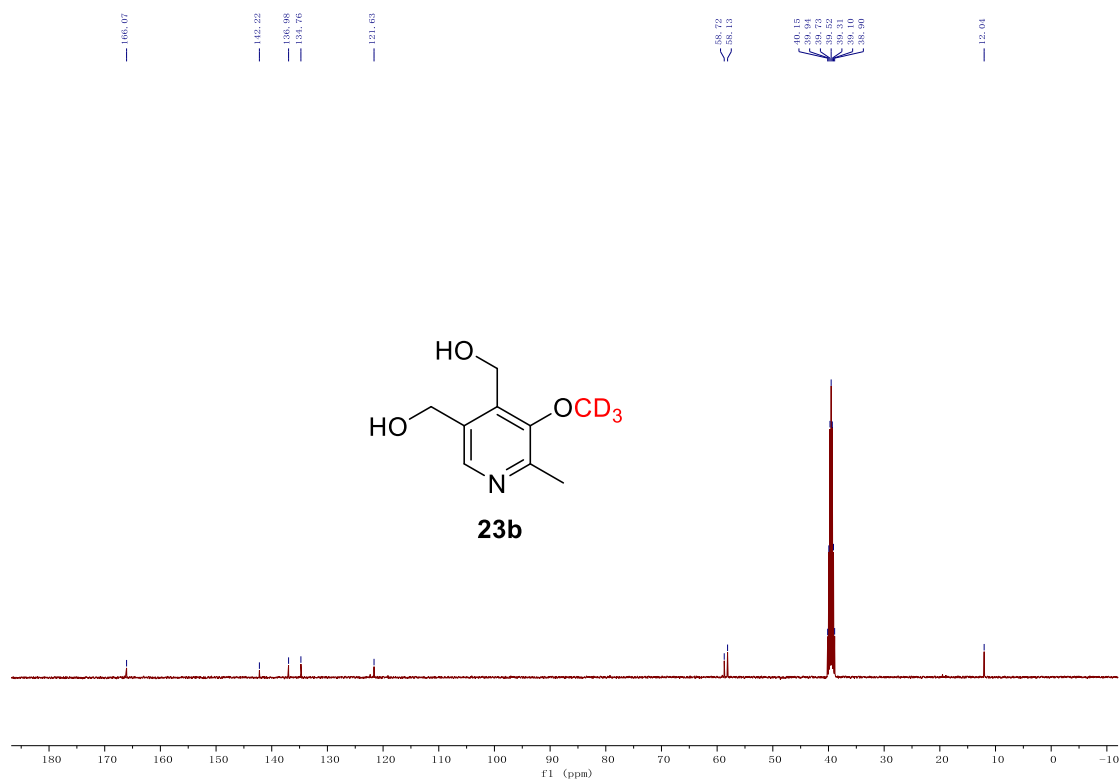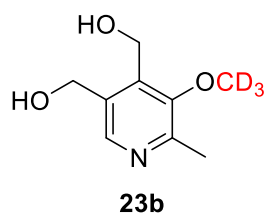



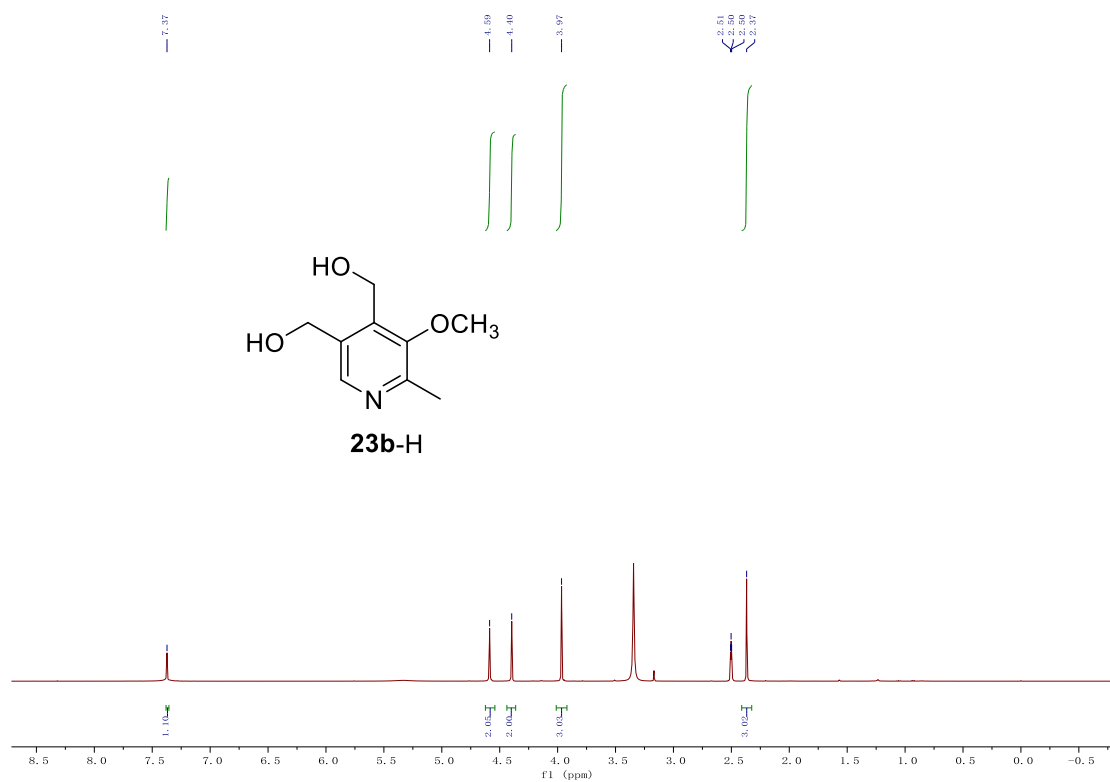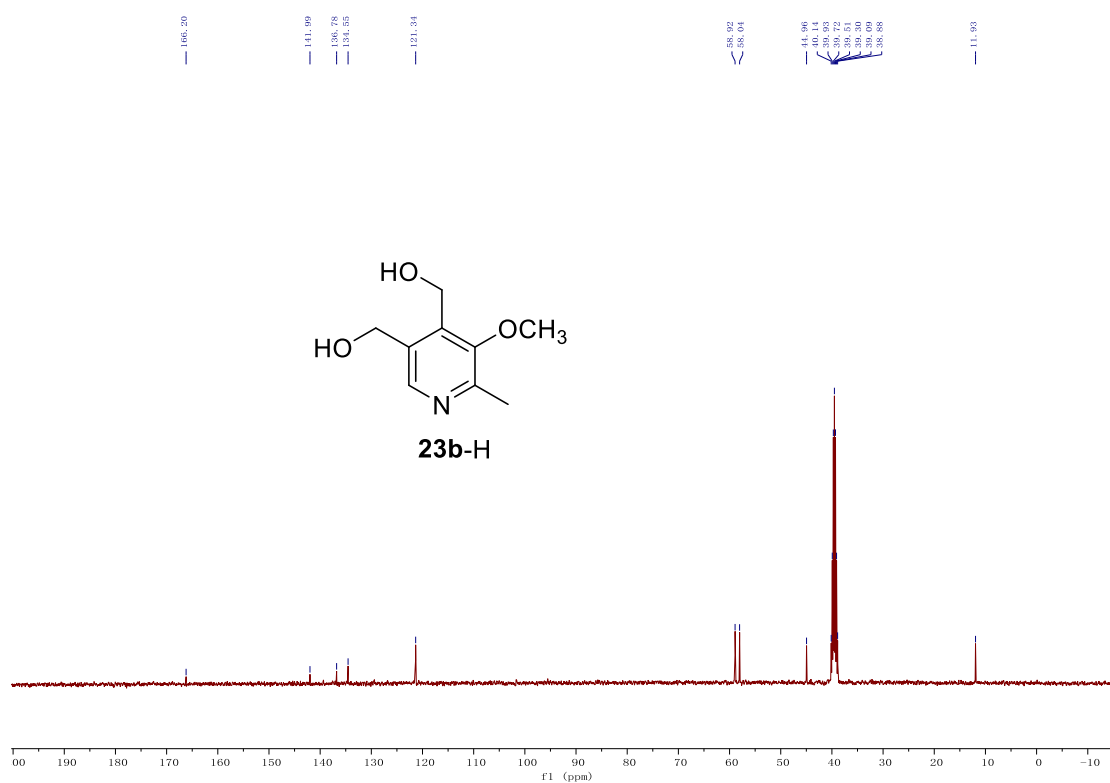

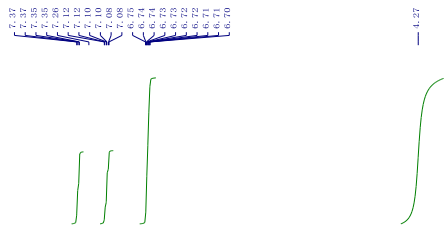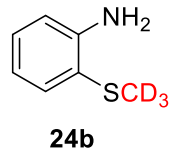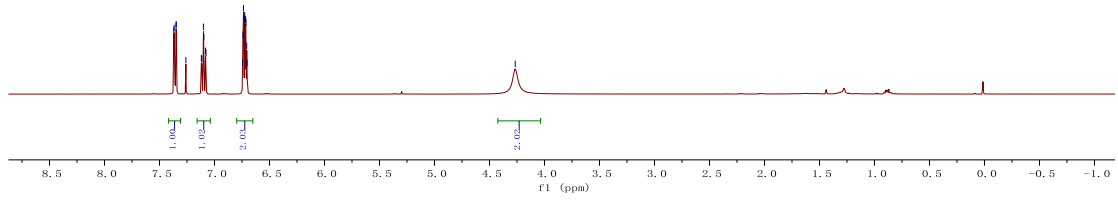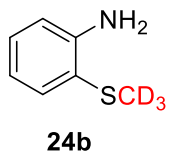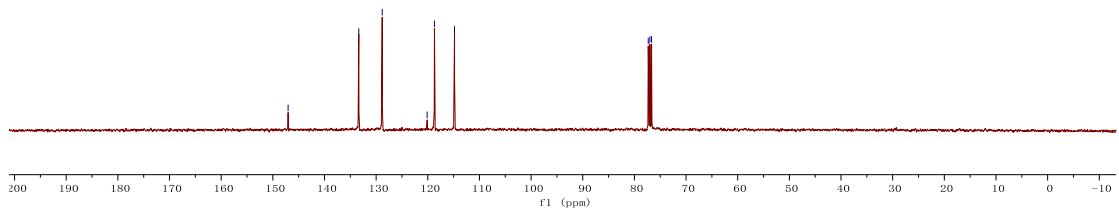

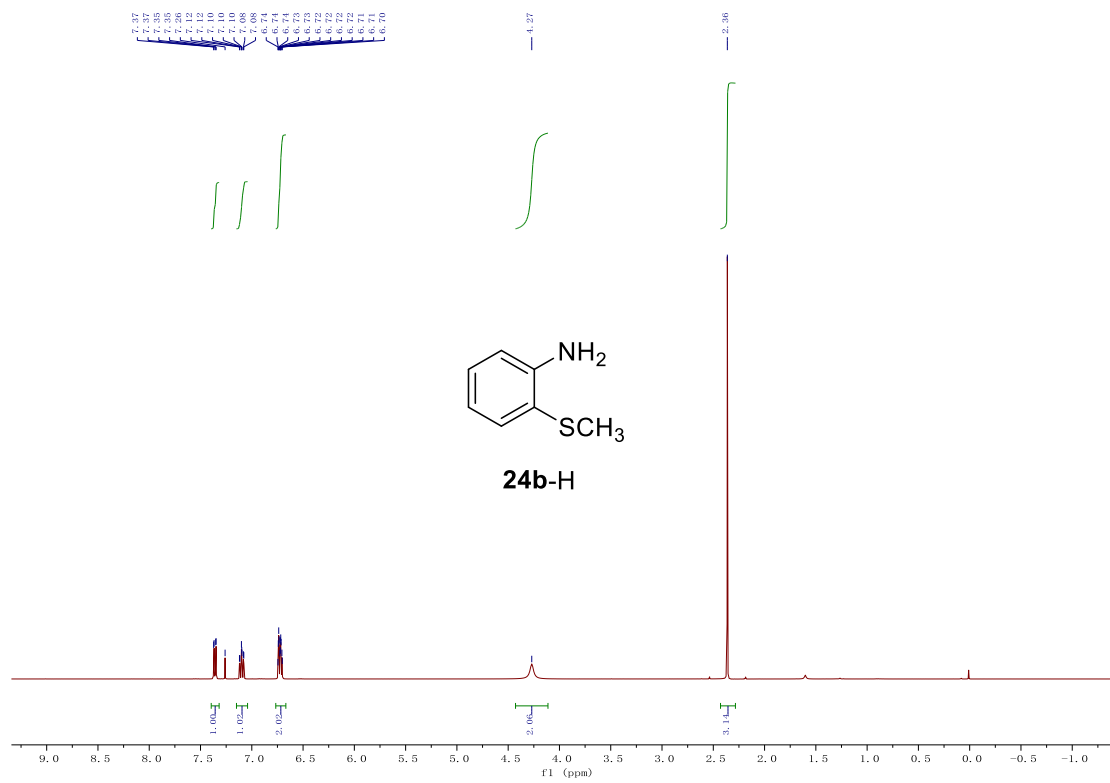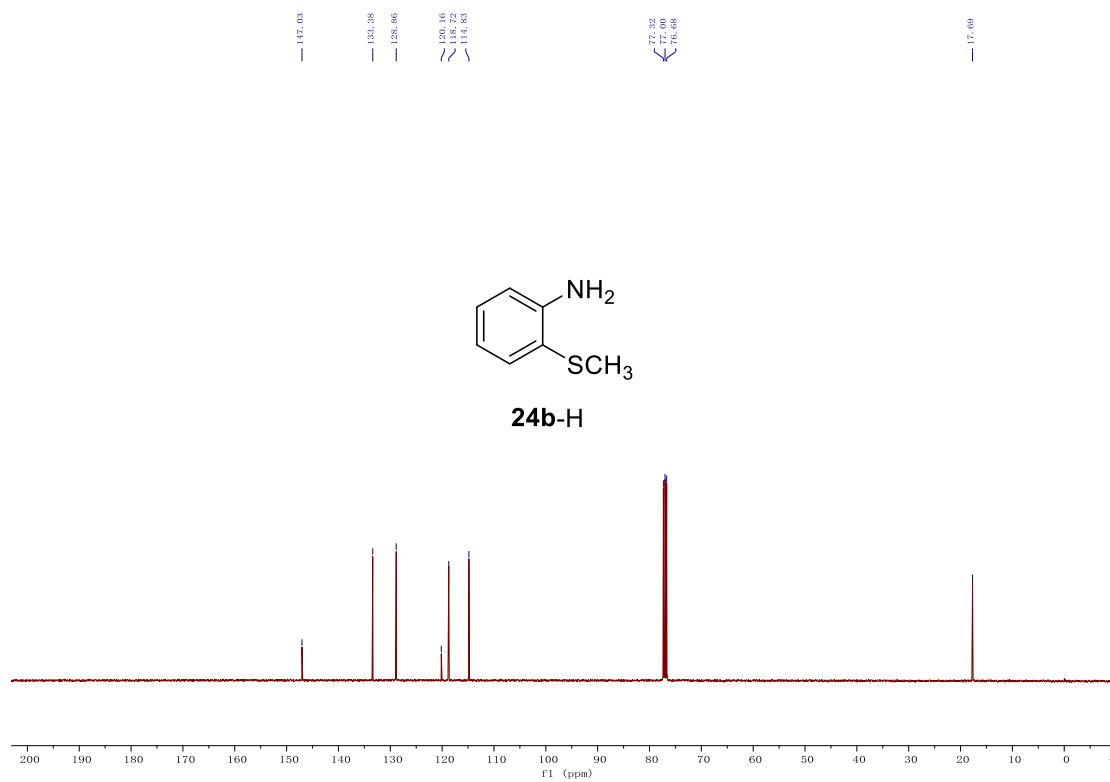

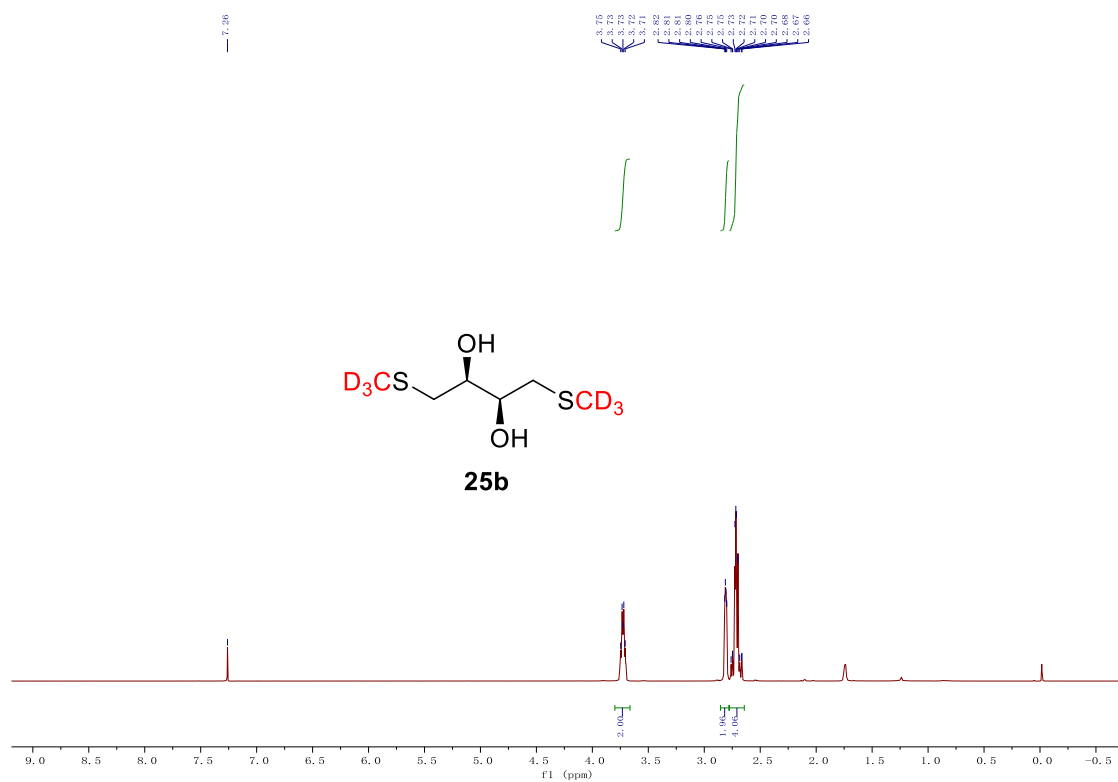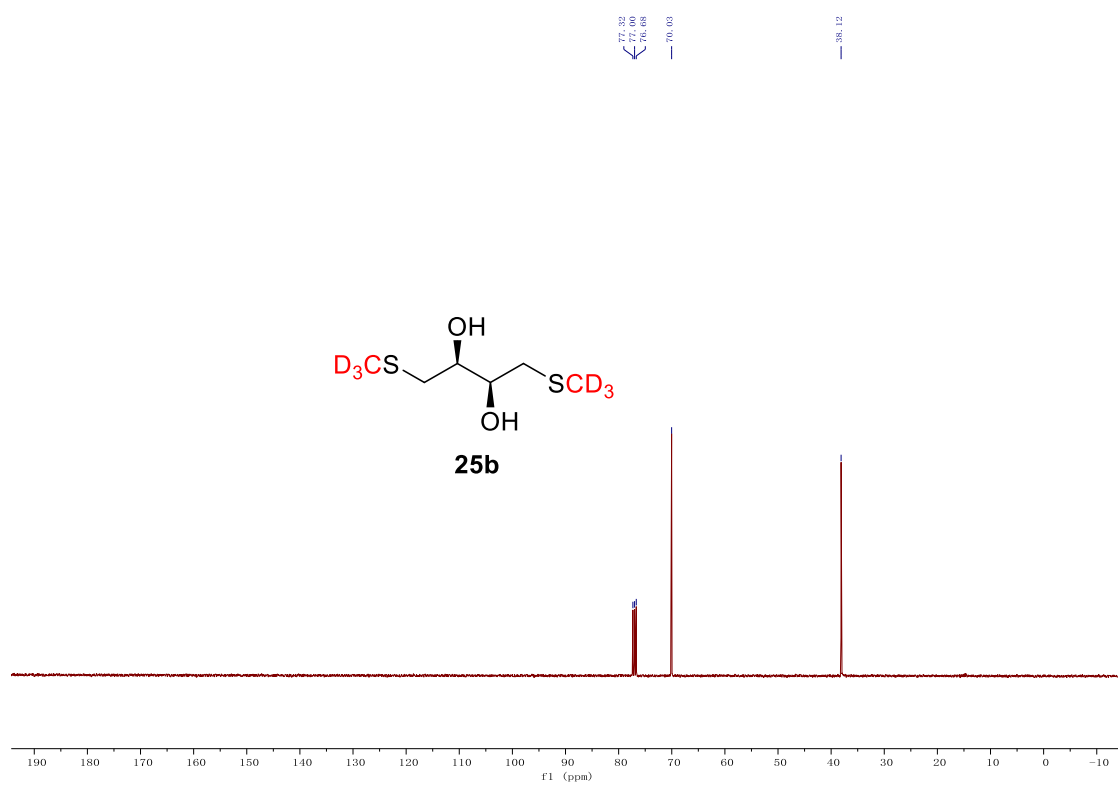

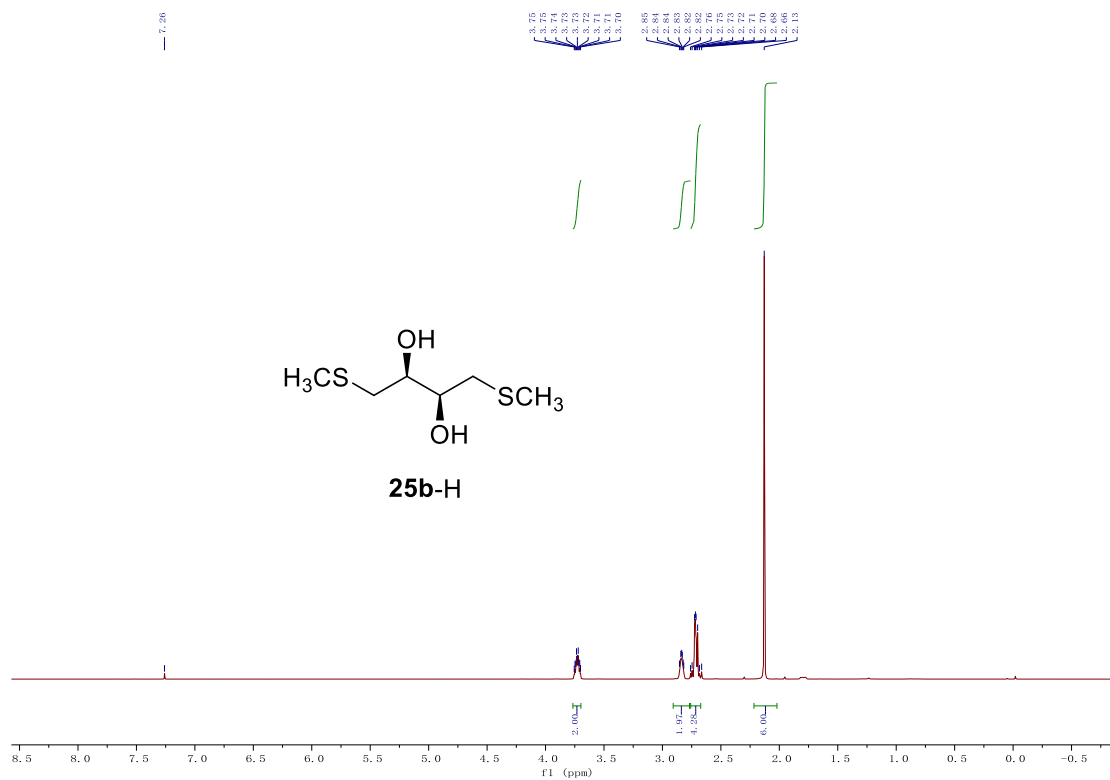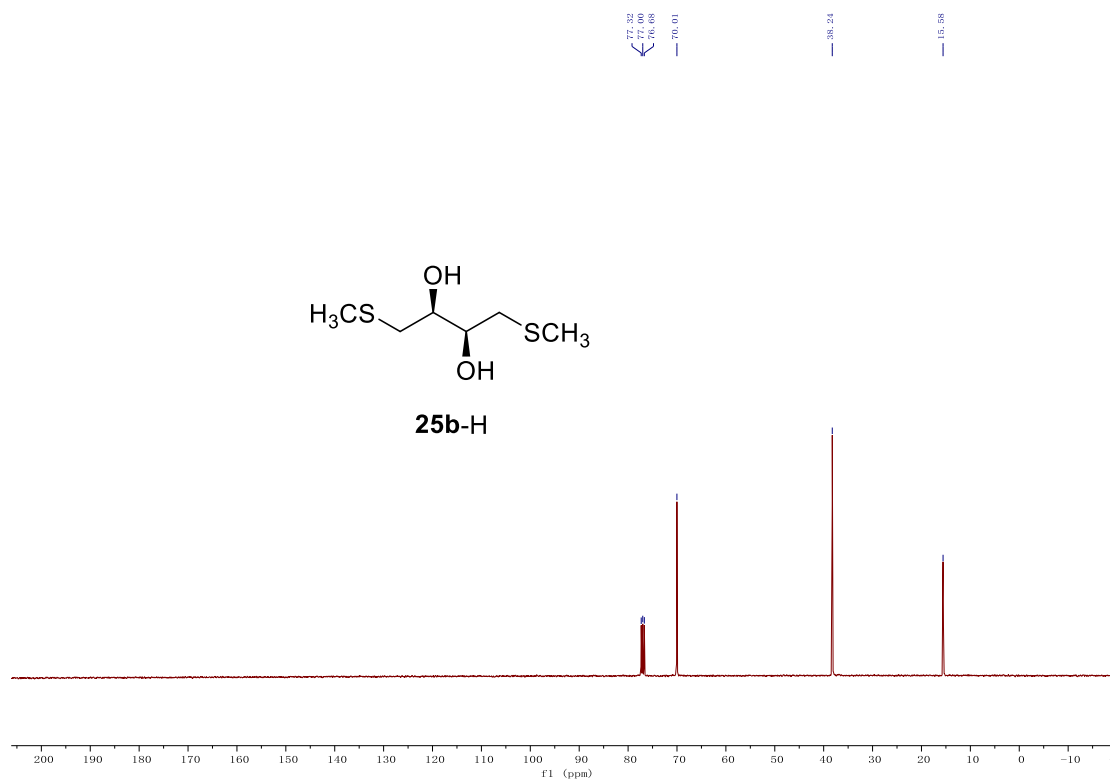

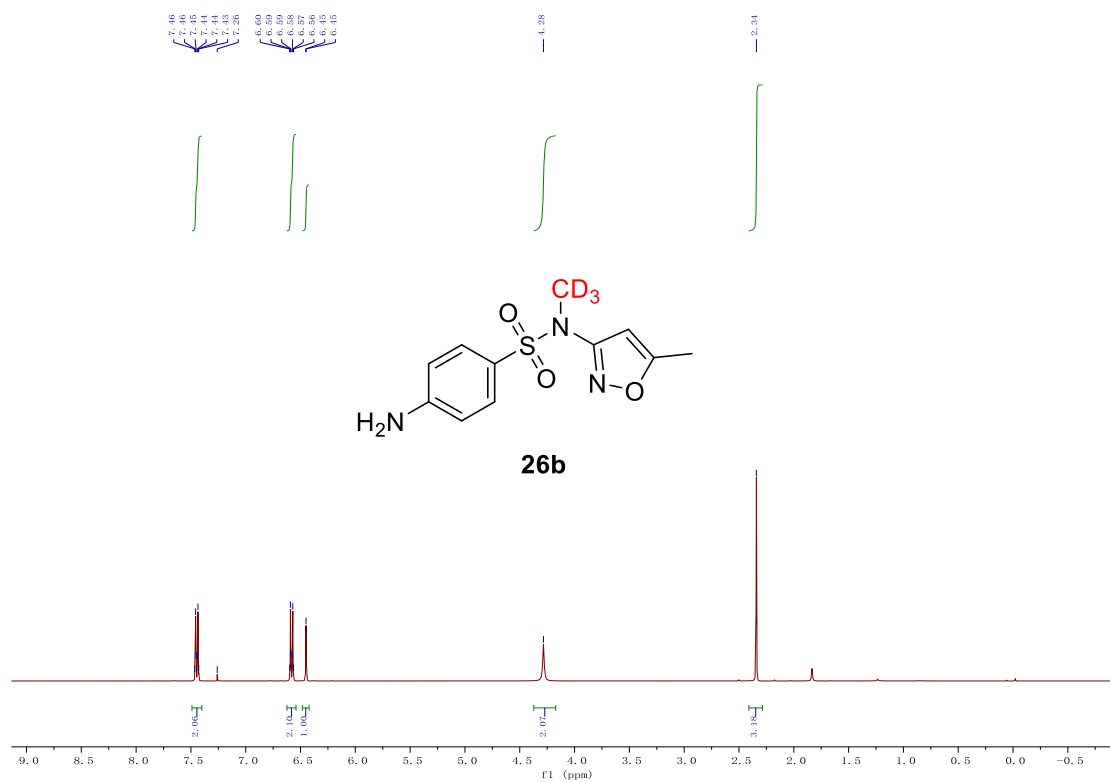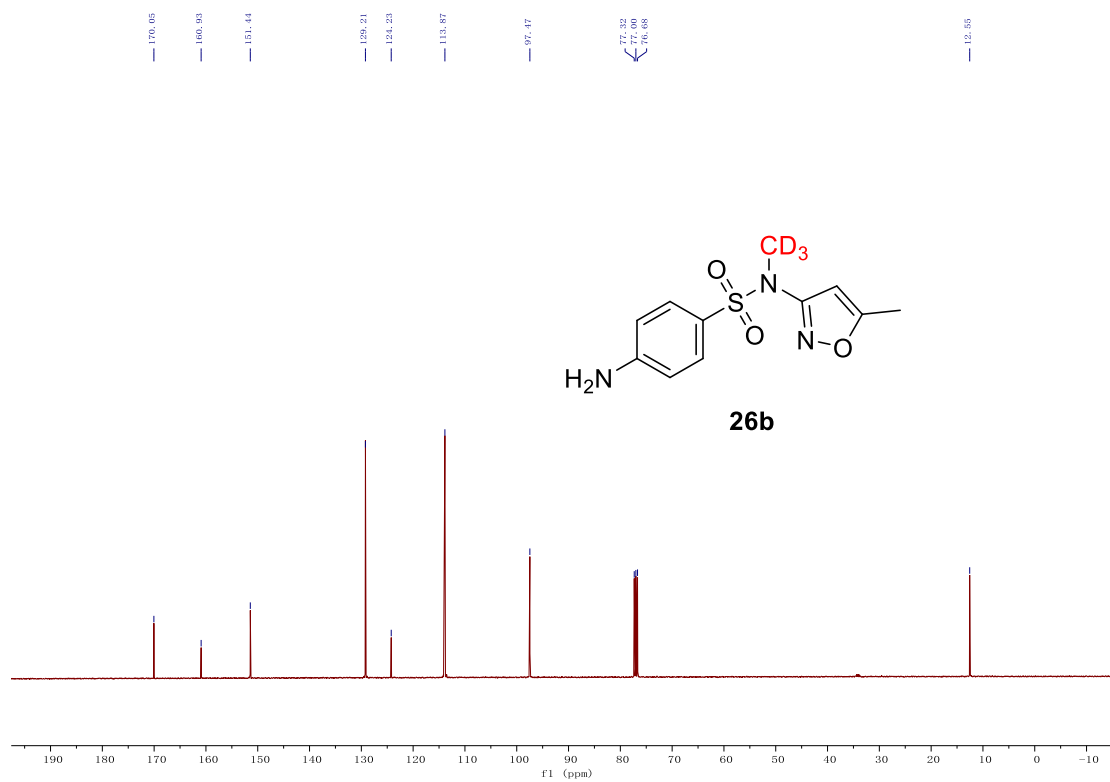

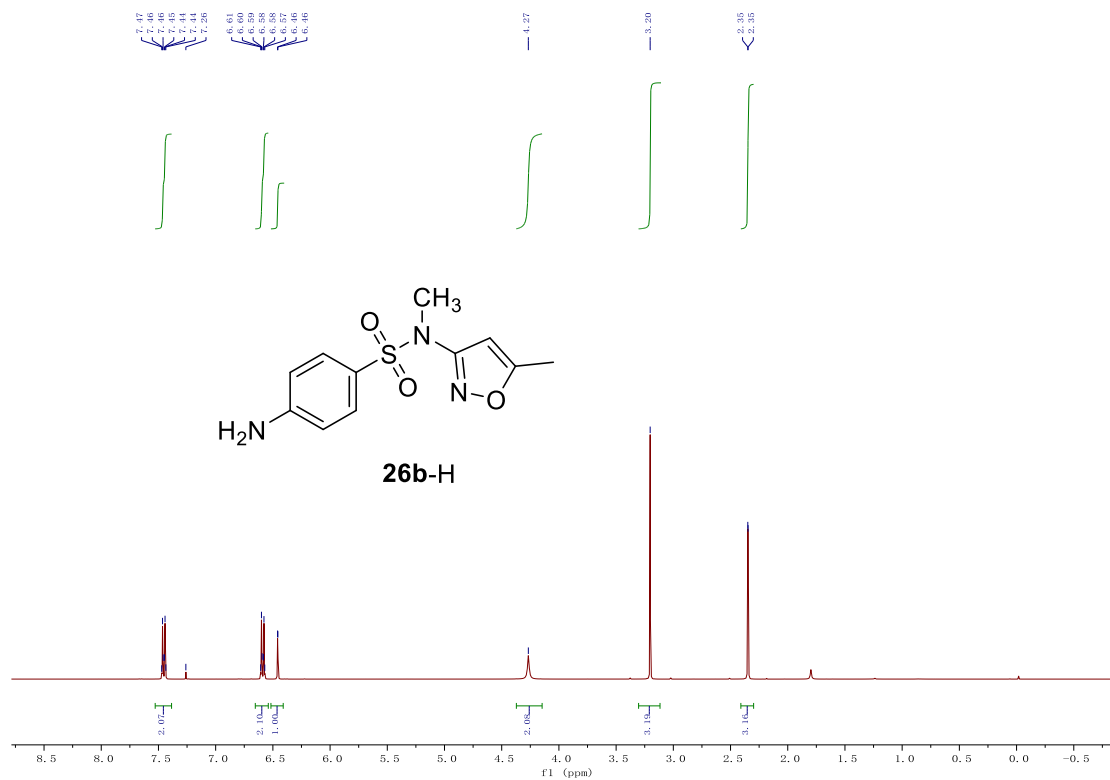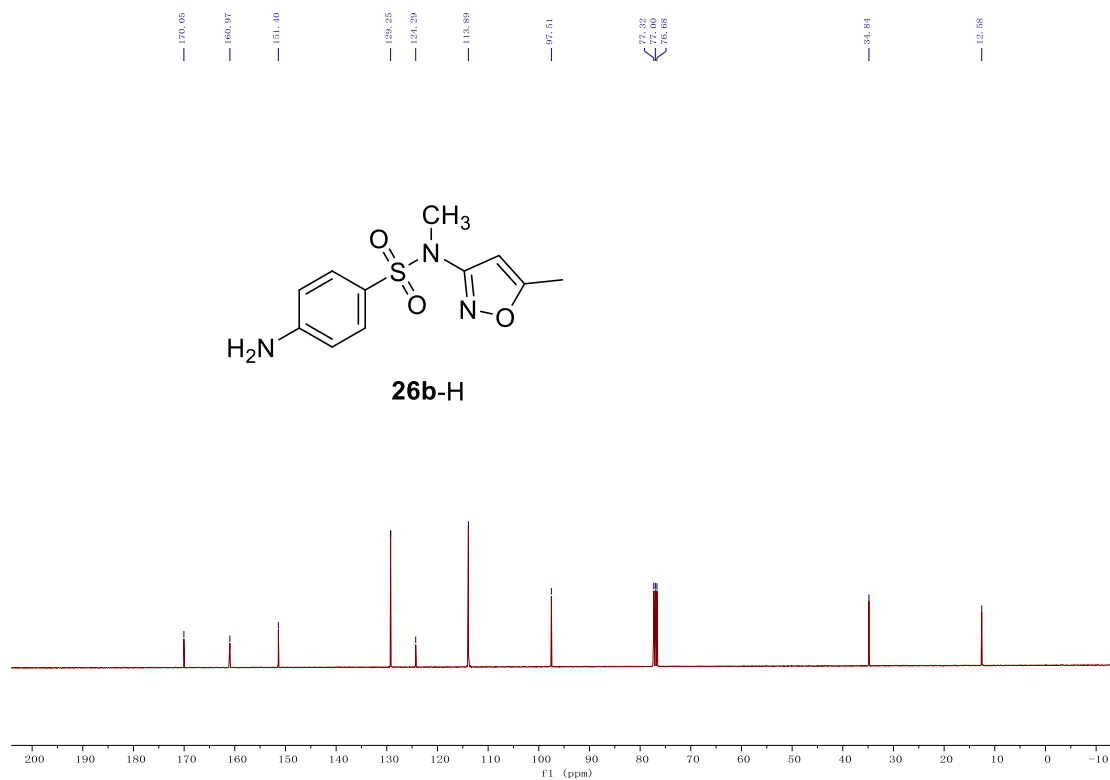

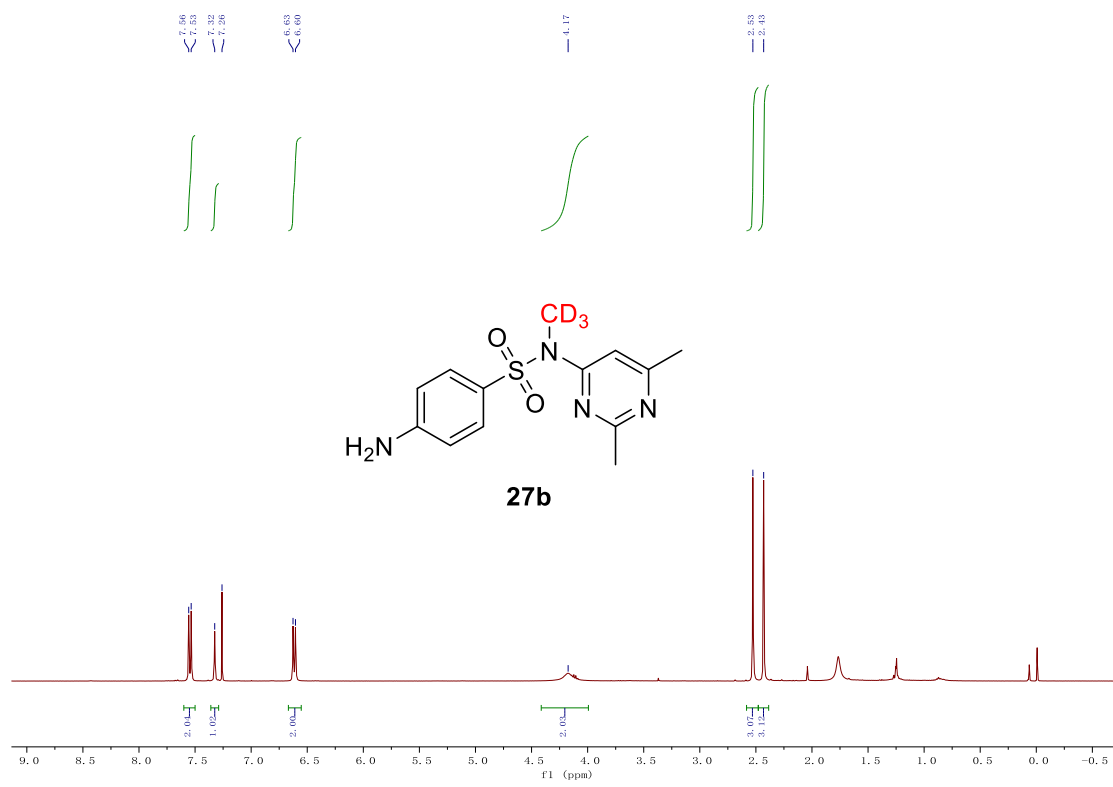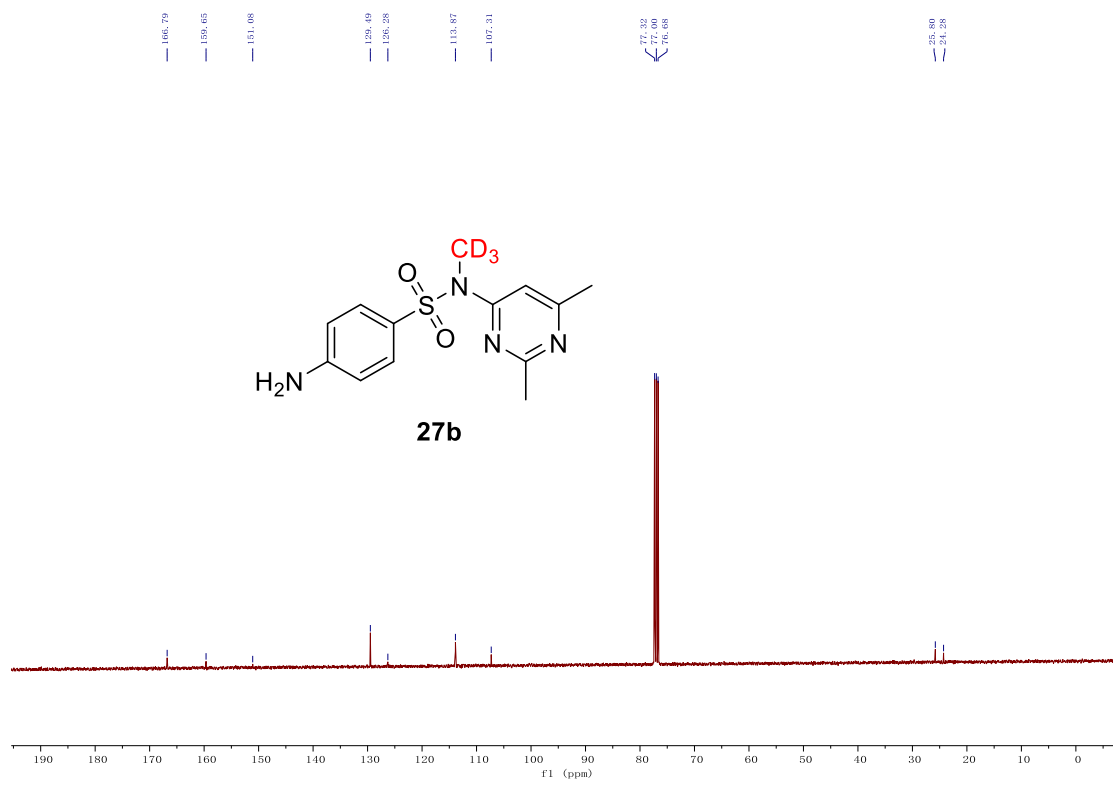



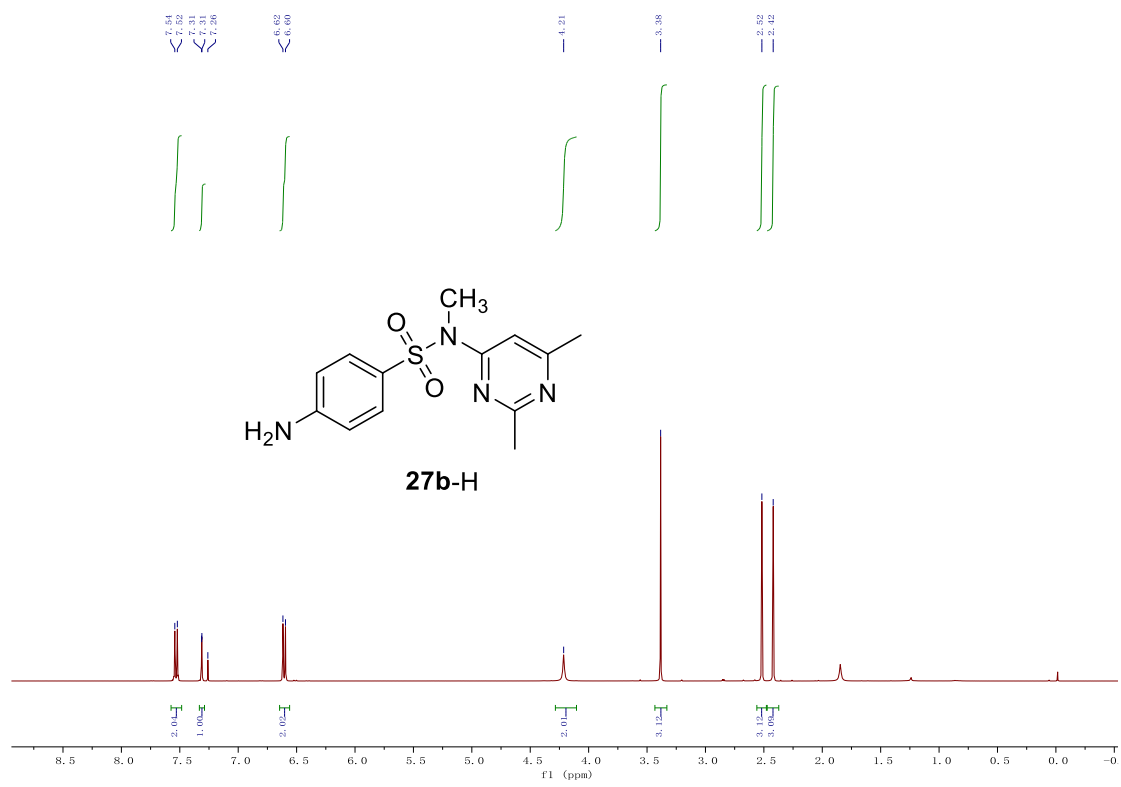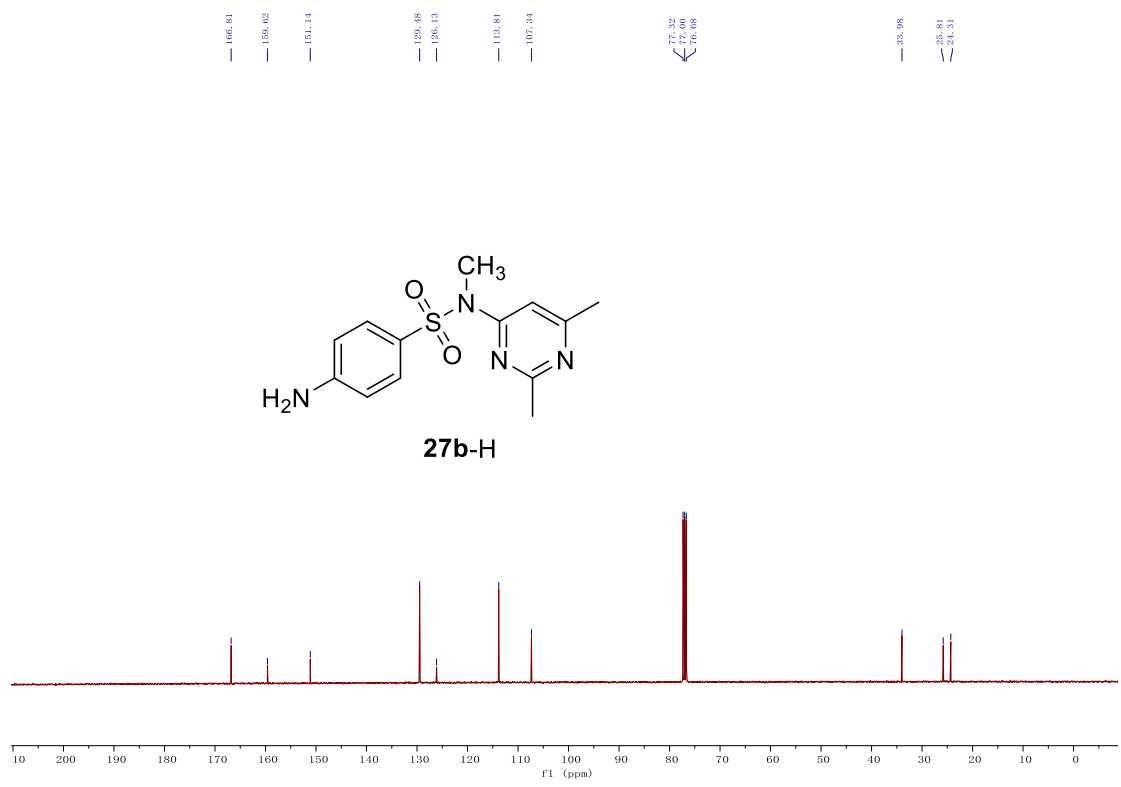

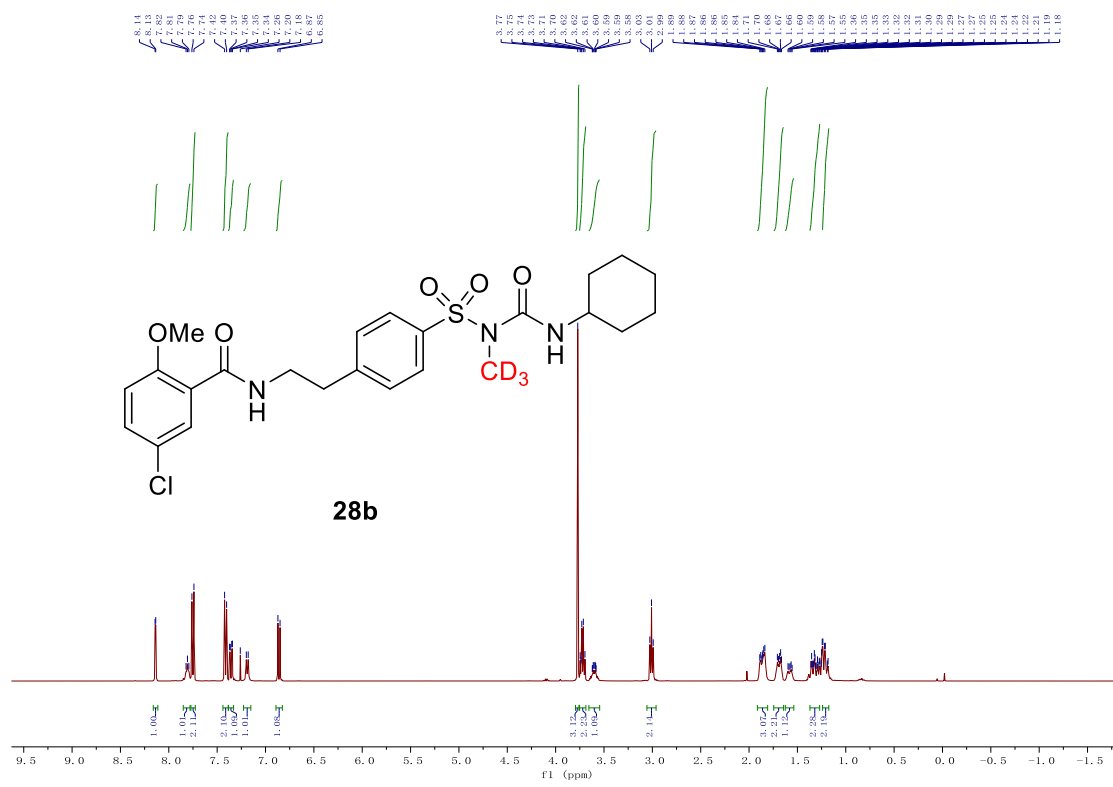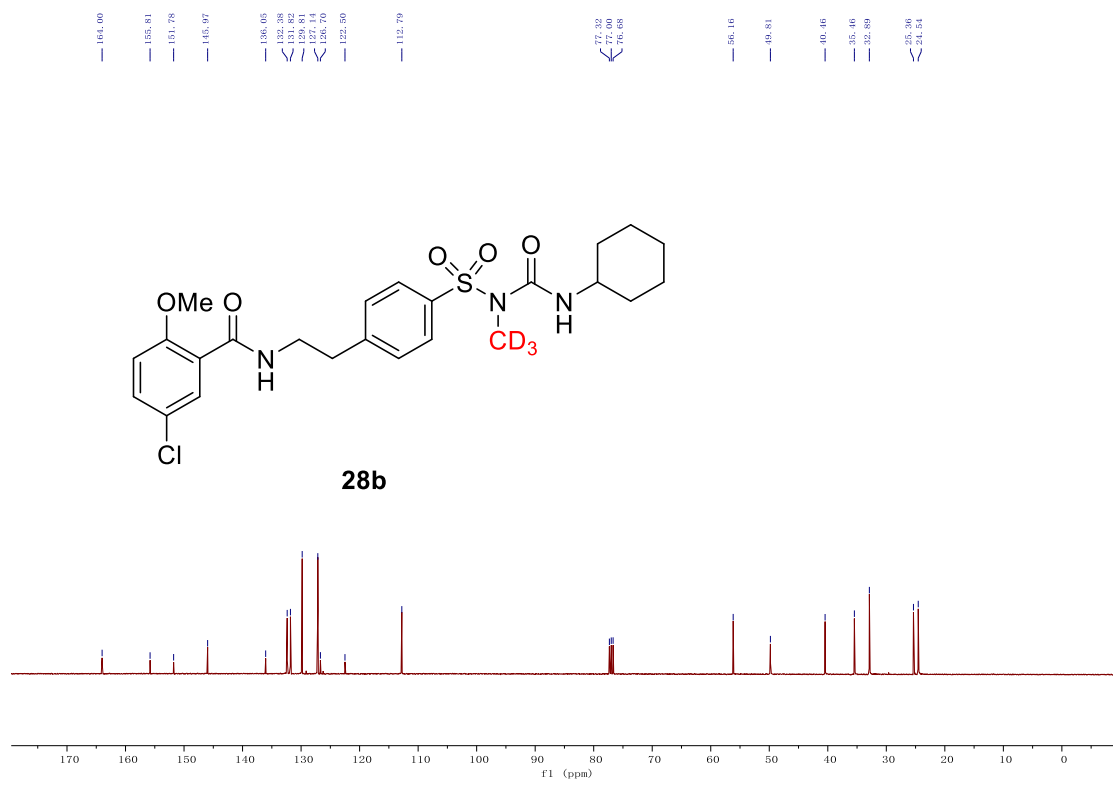

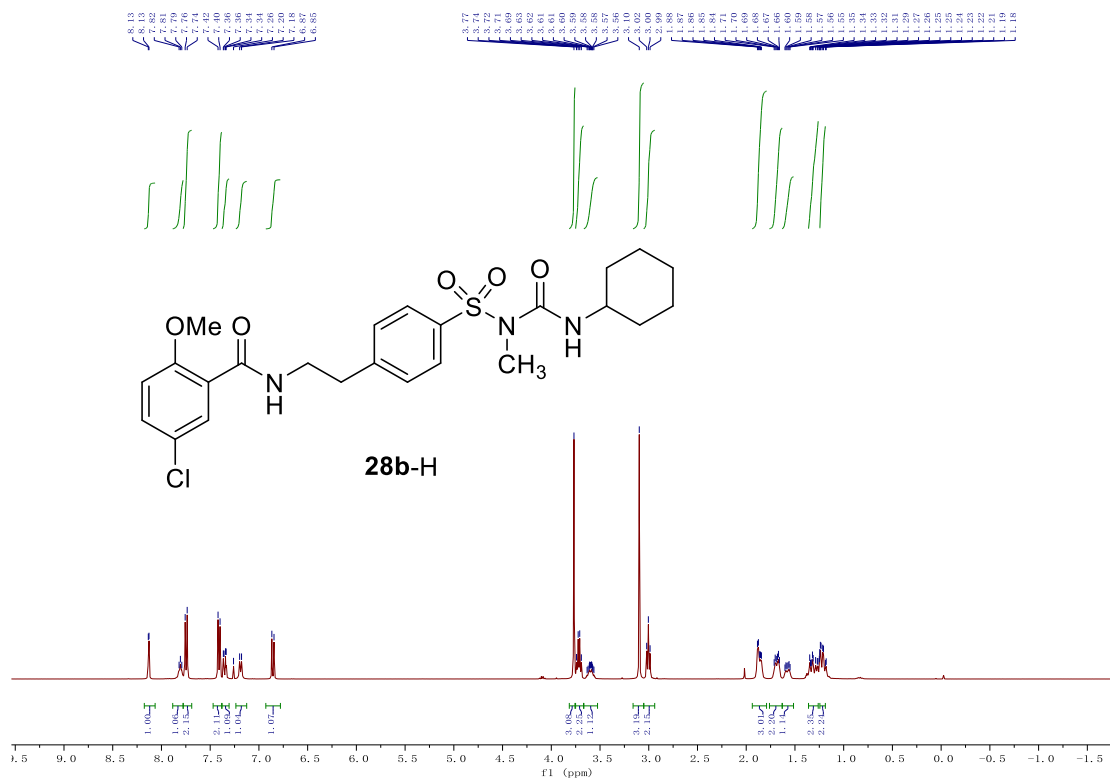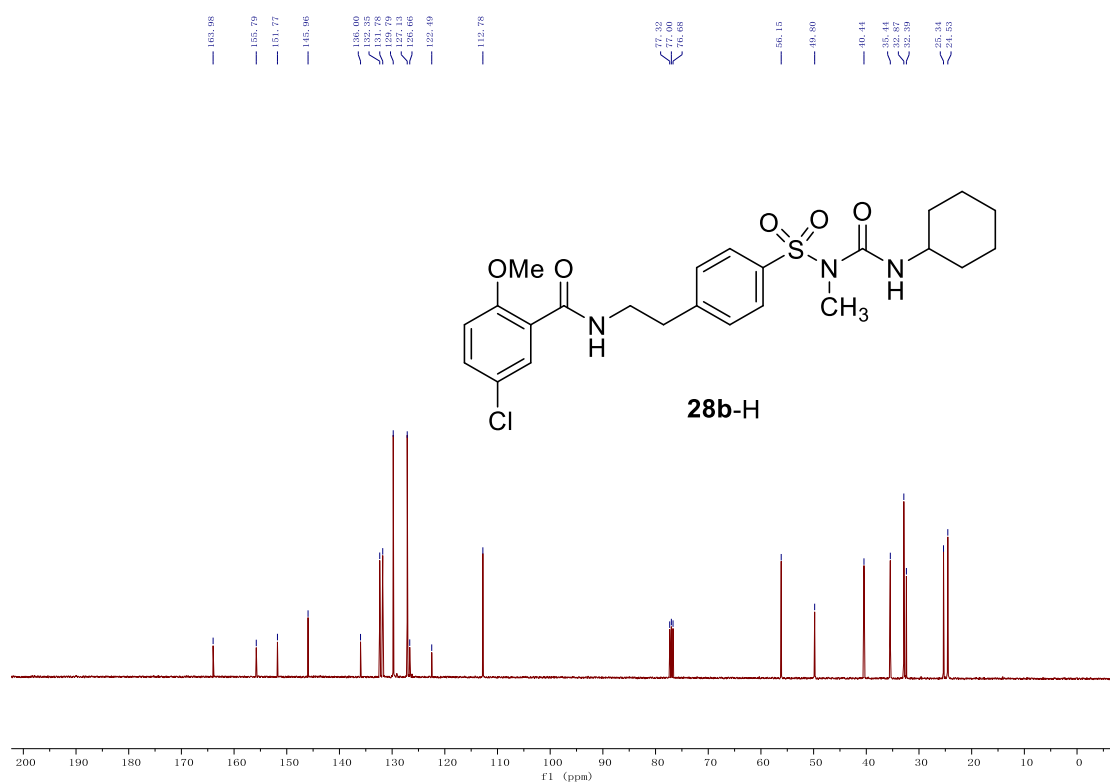

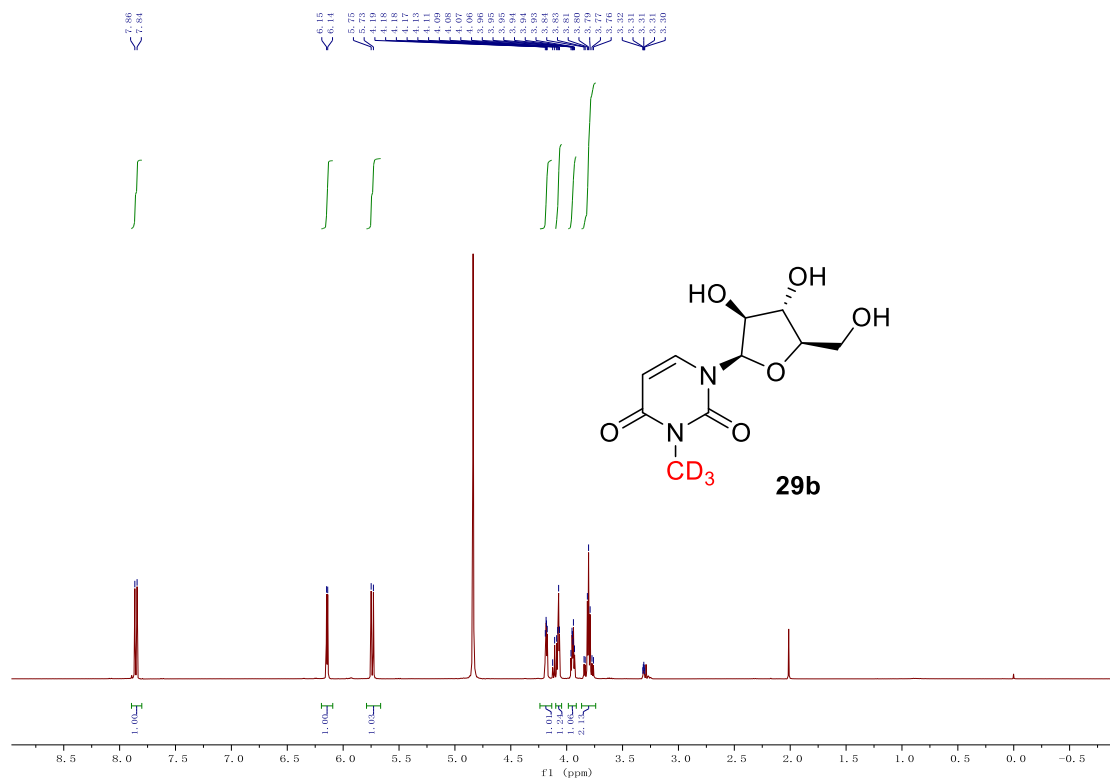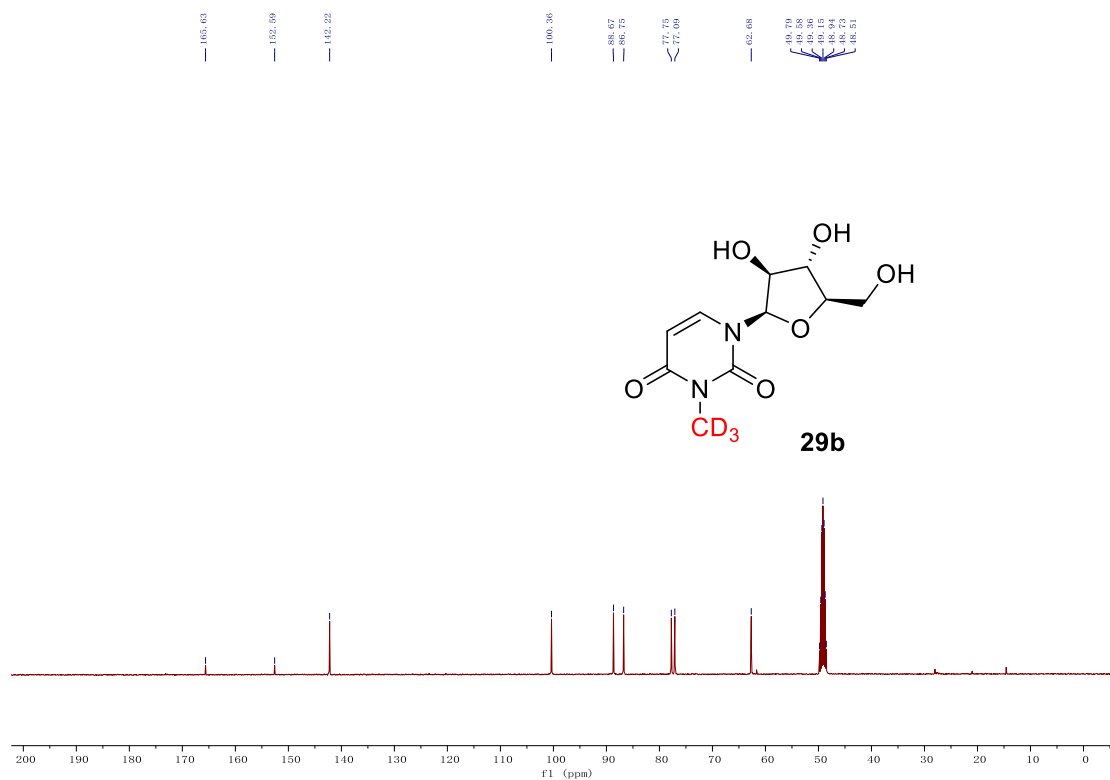

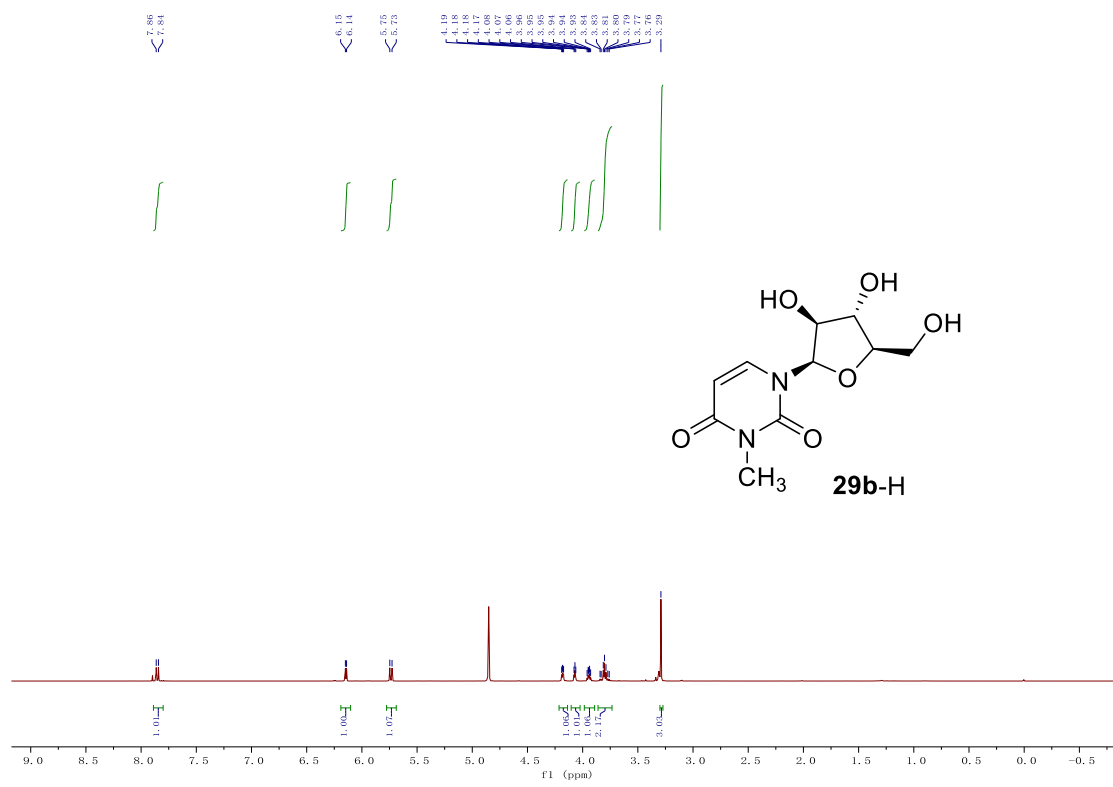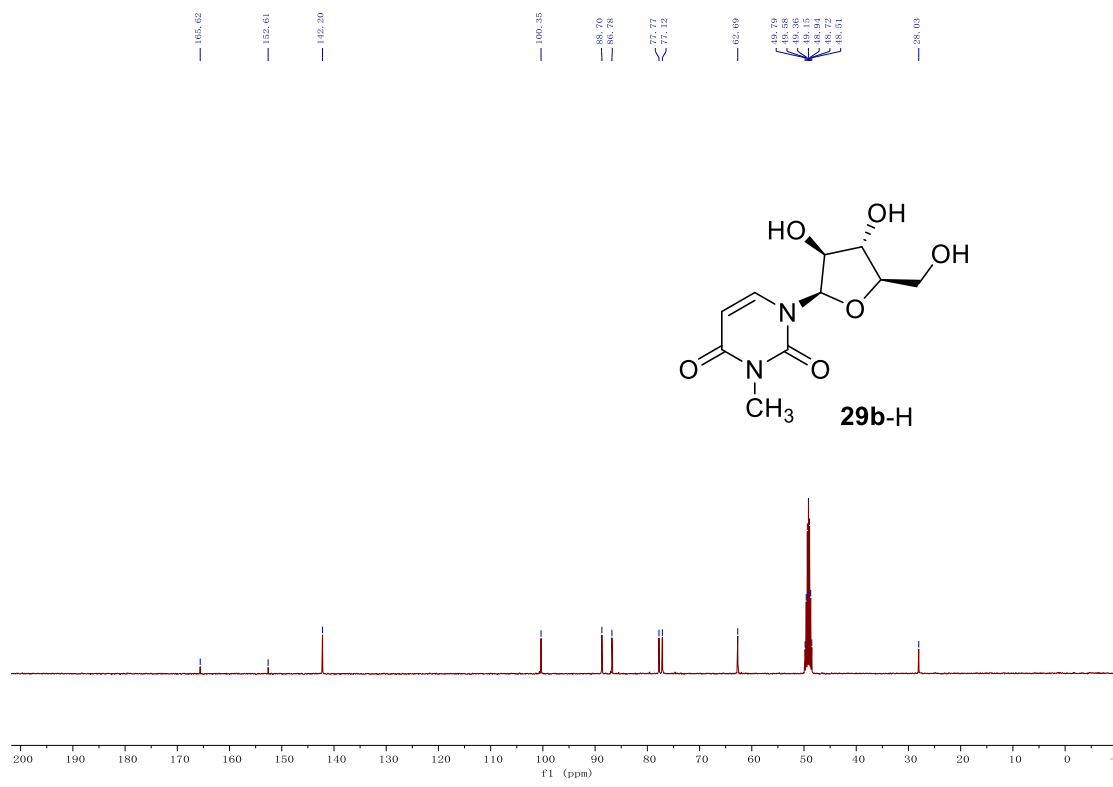

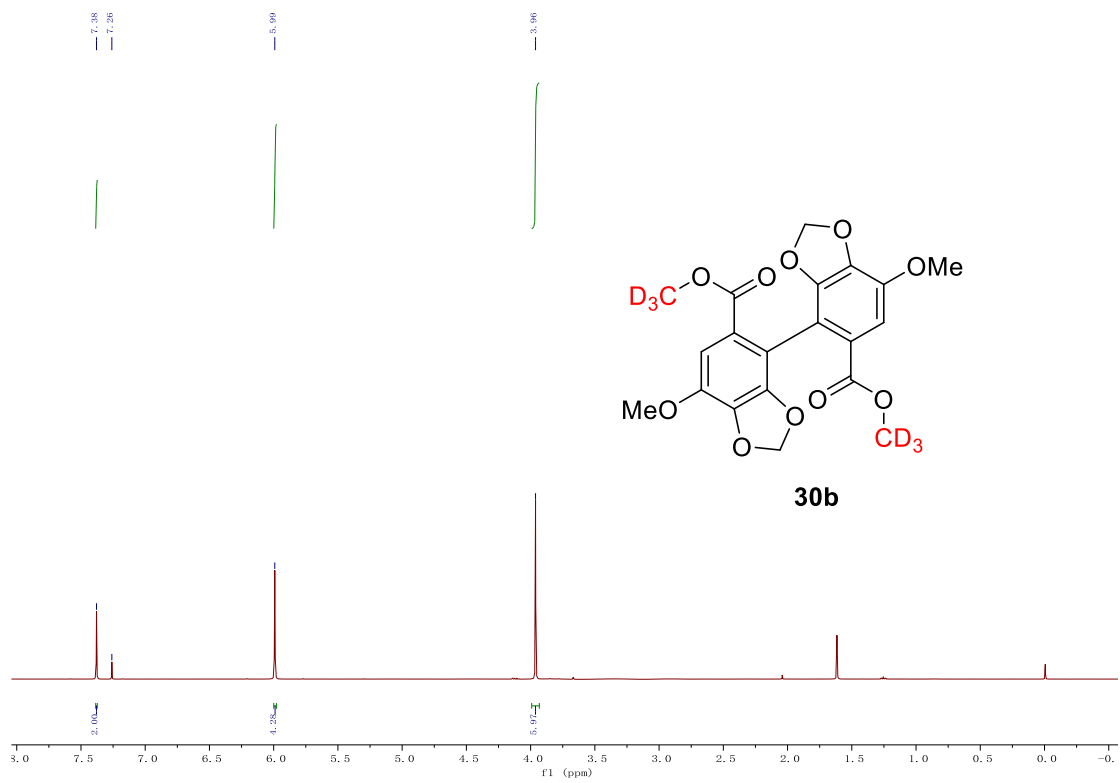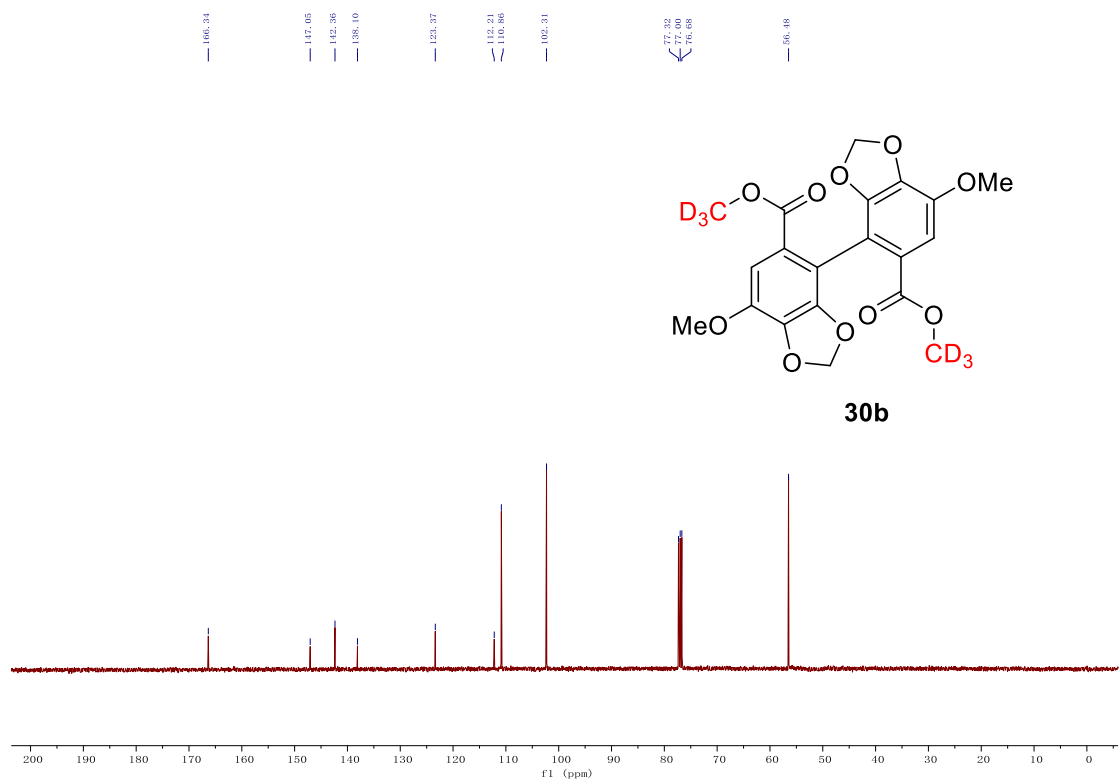

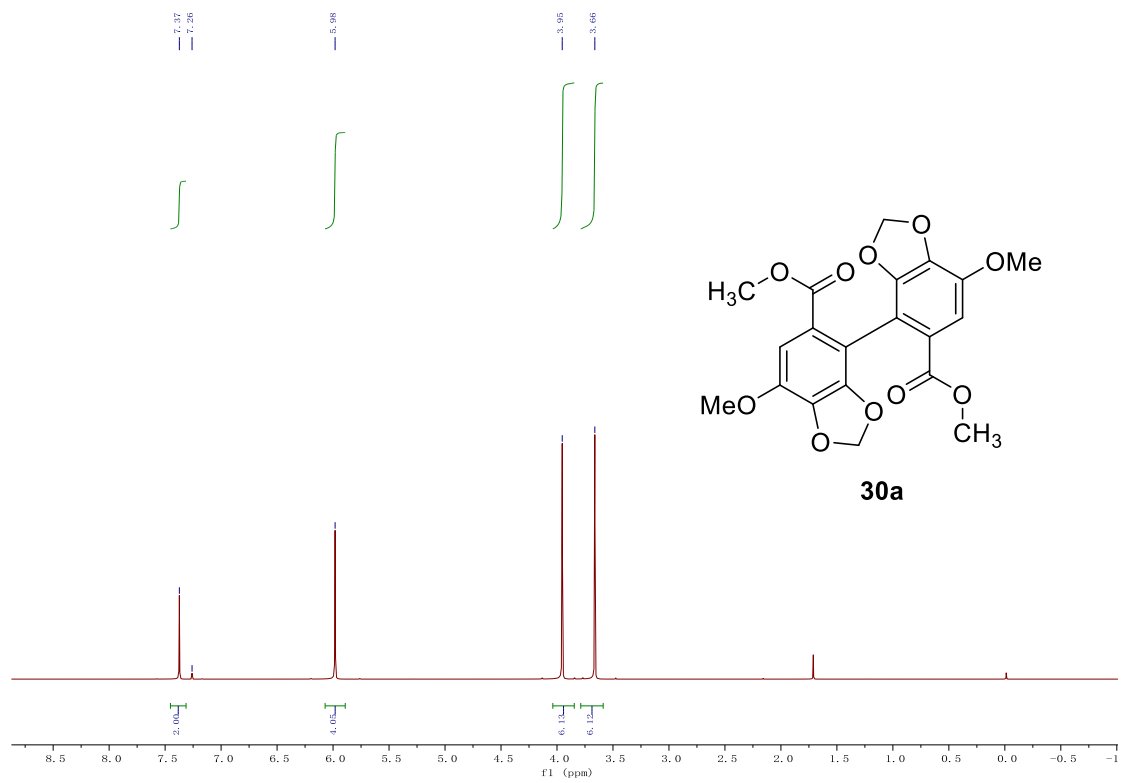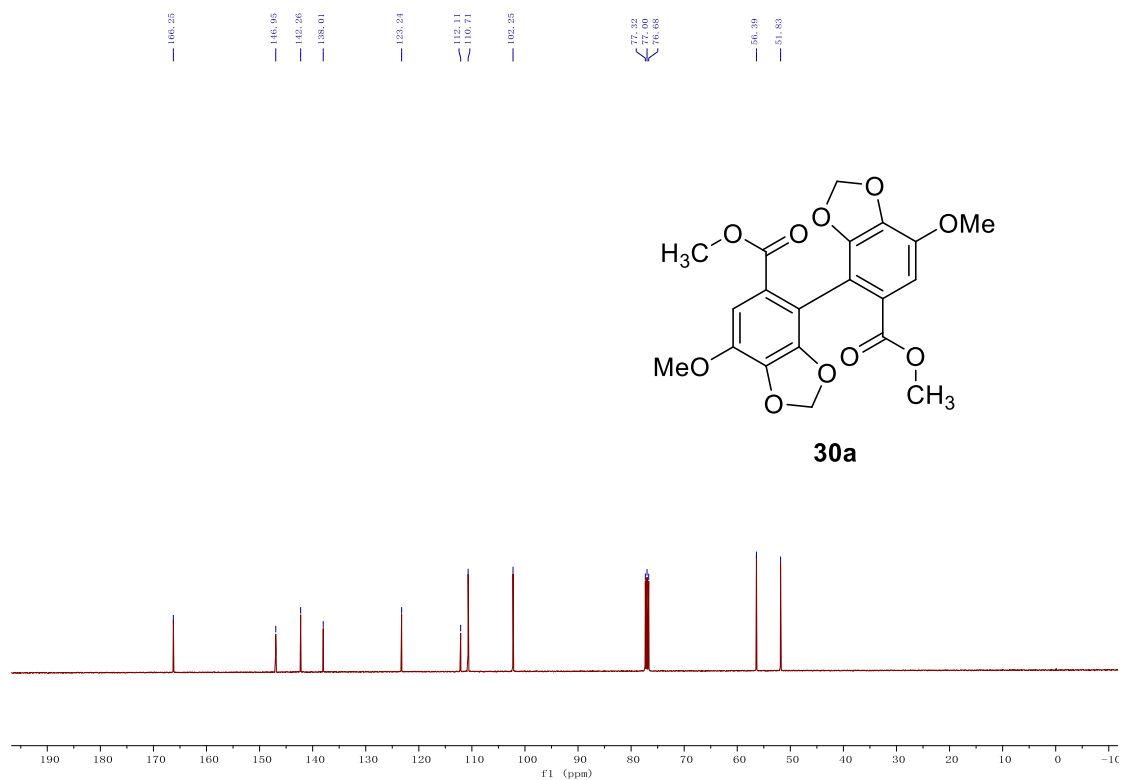

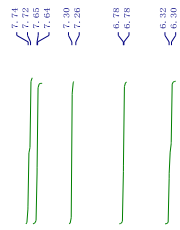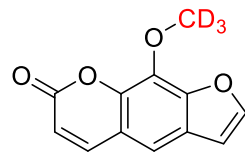

**31b**

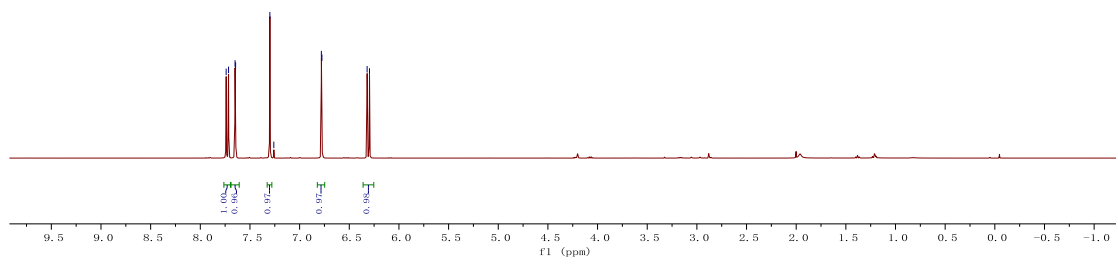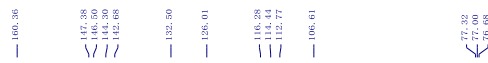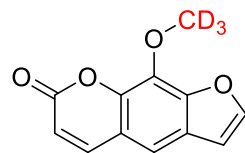

**31b**

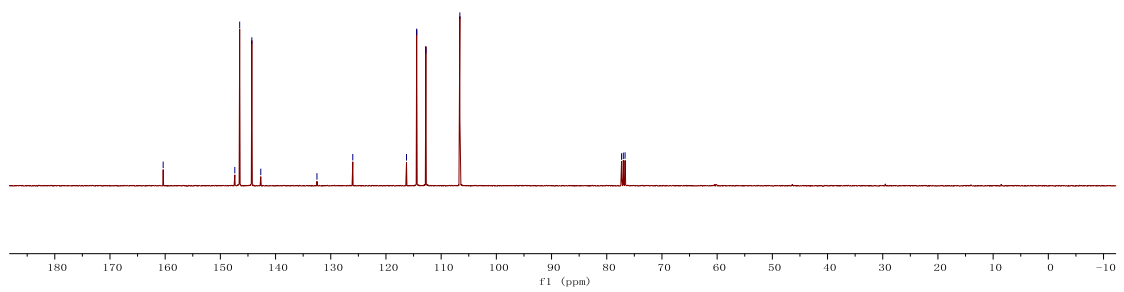



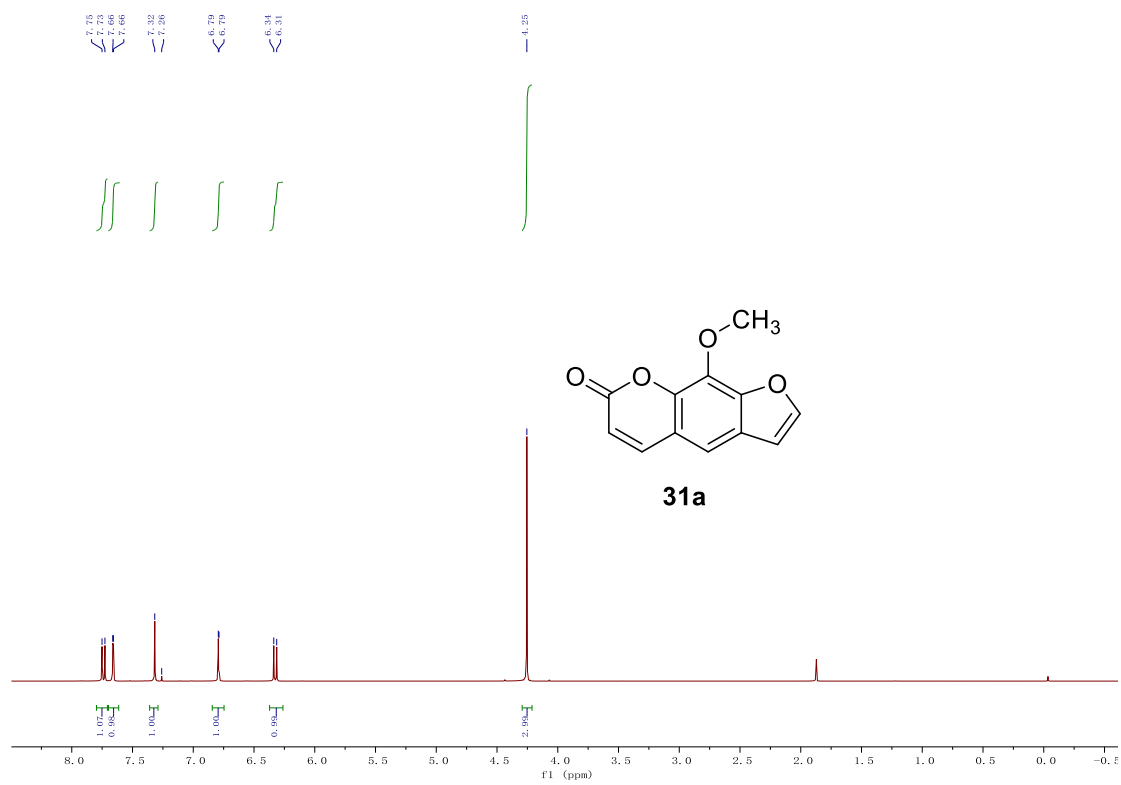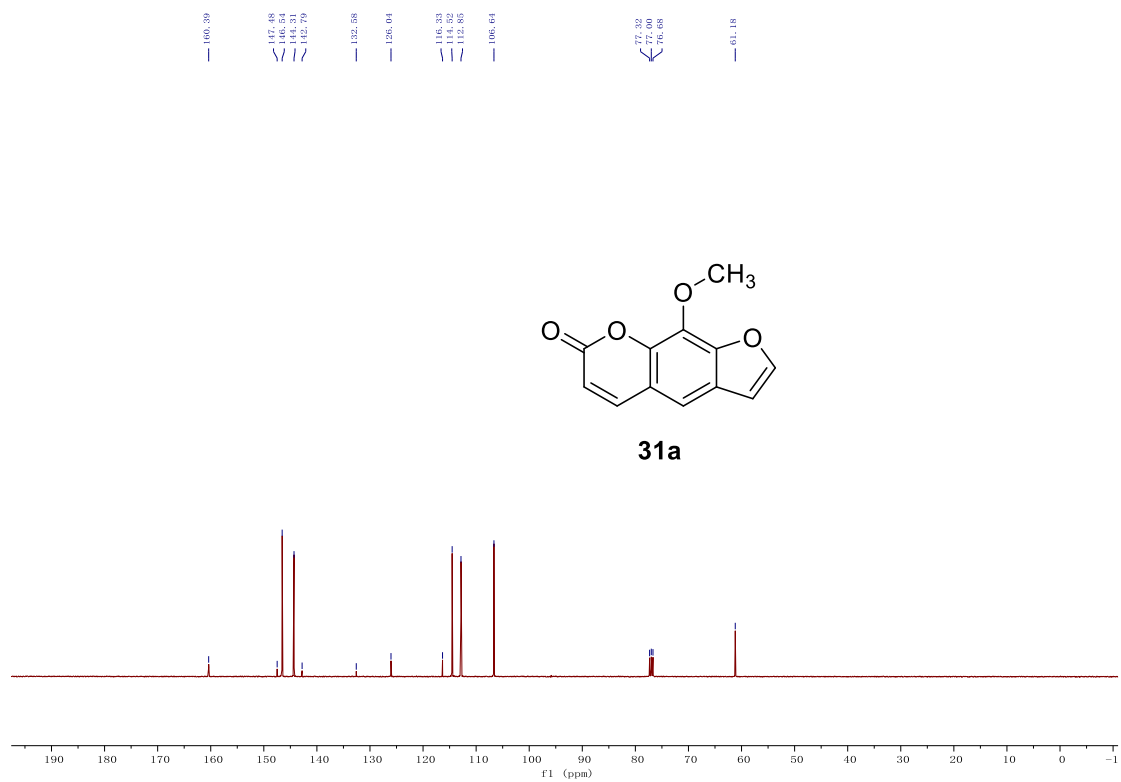

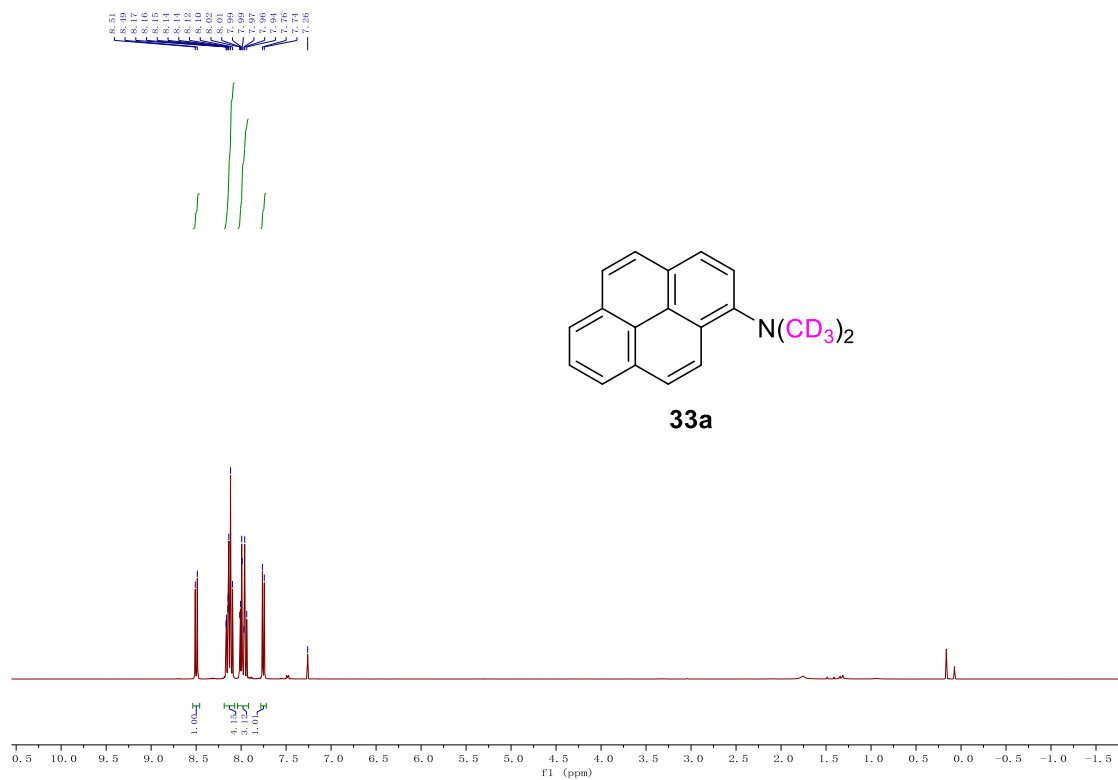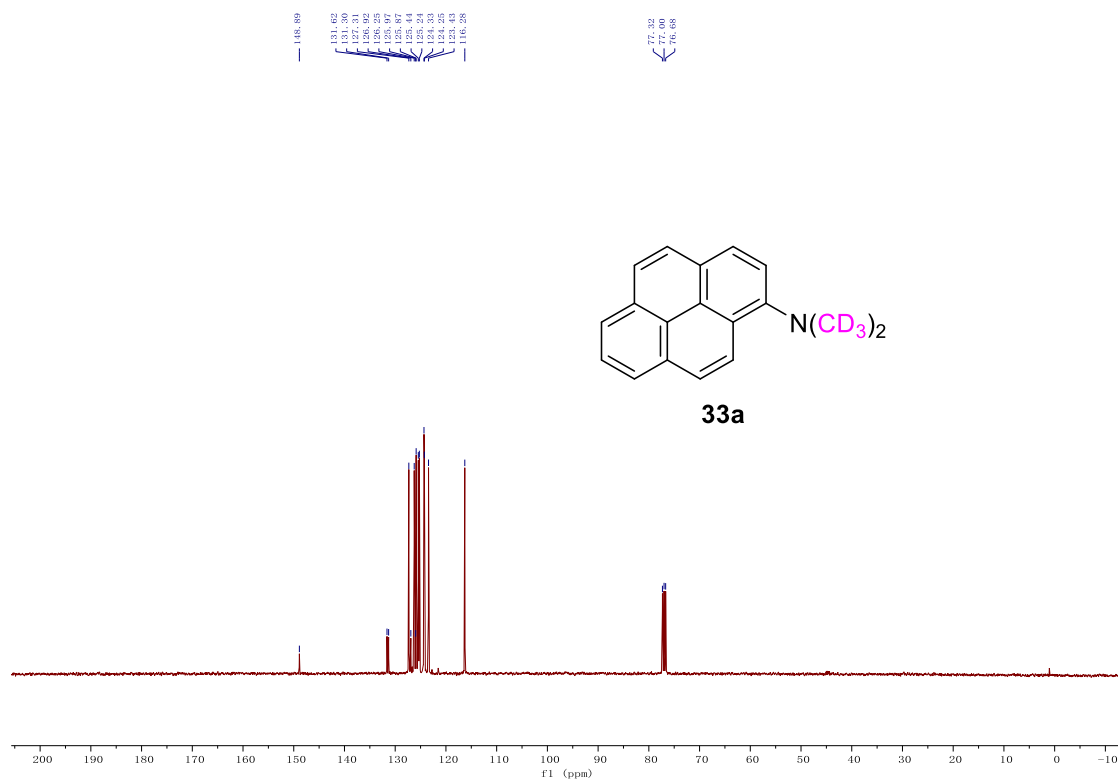

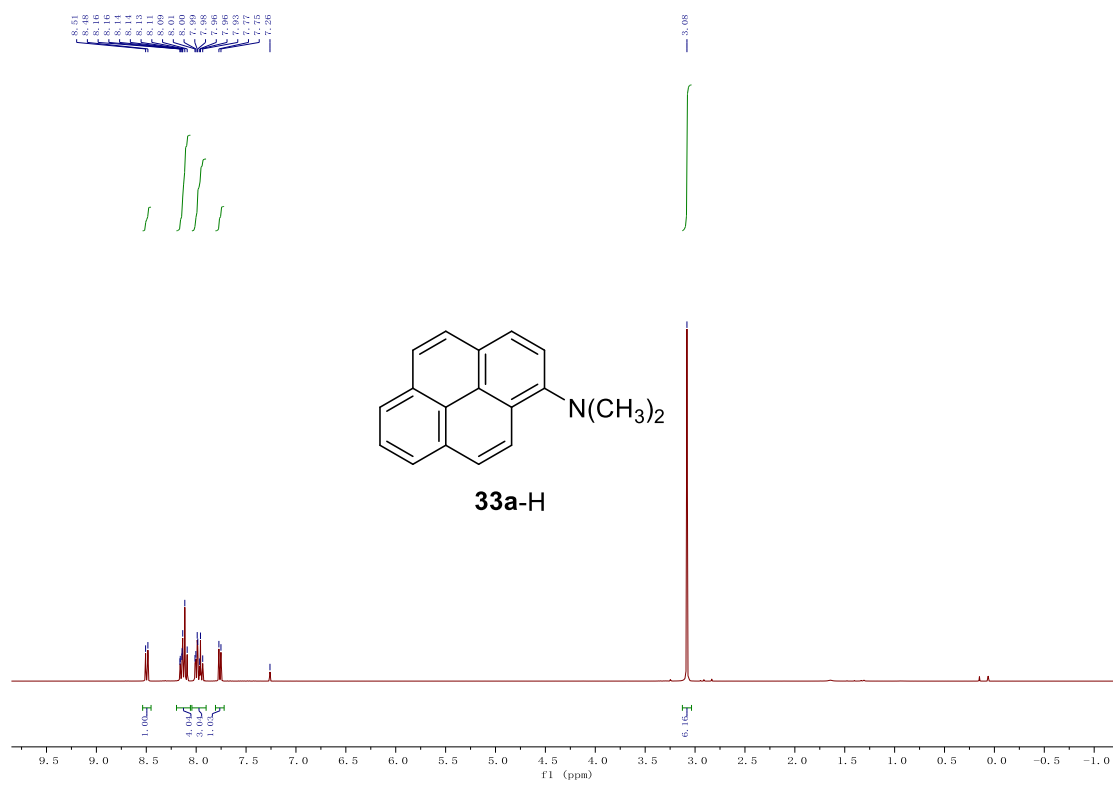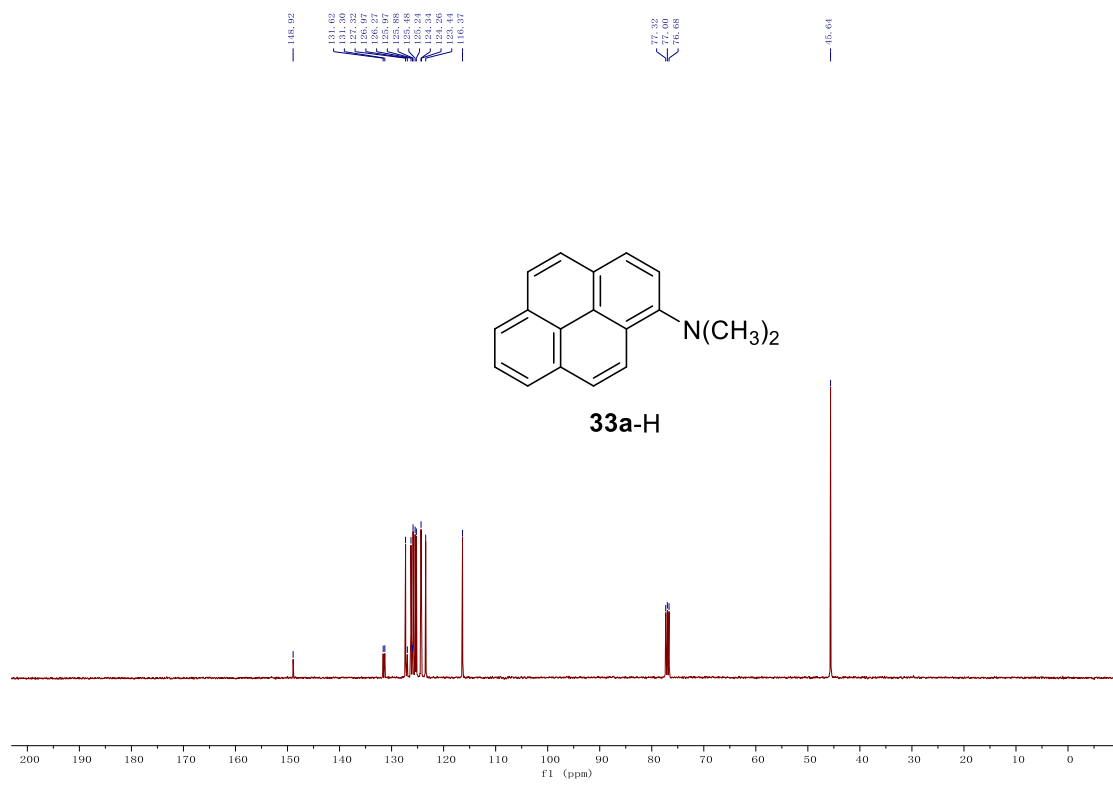



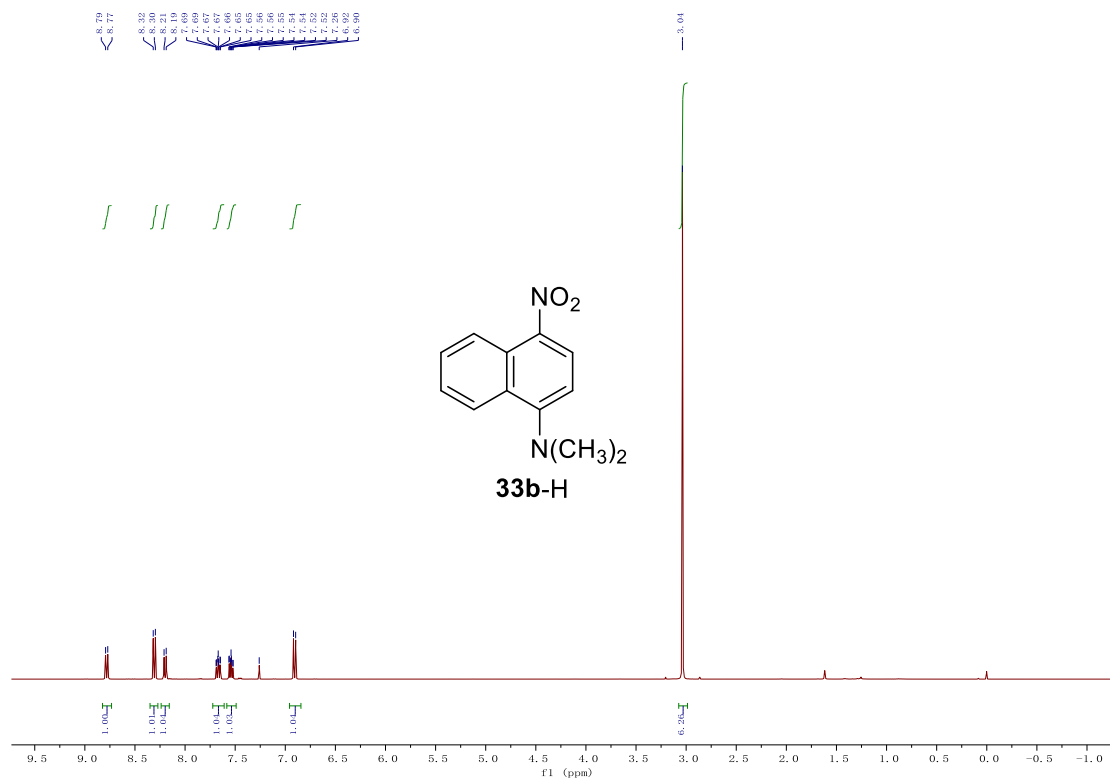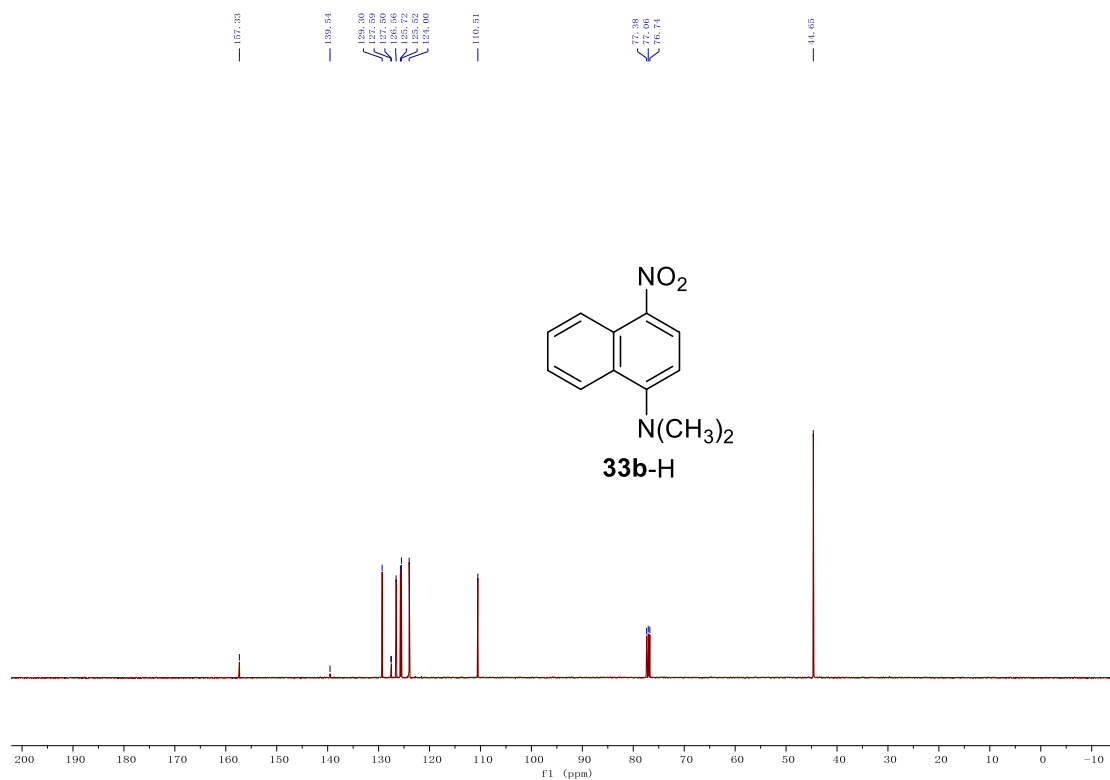

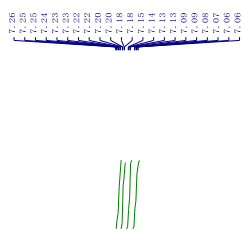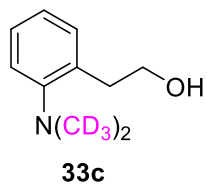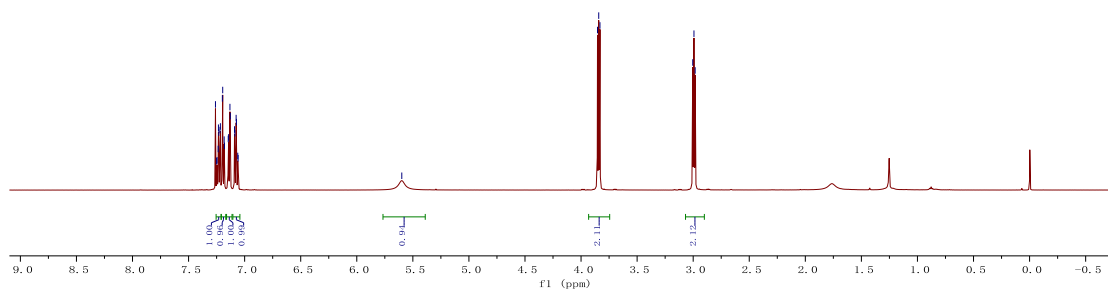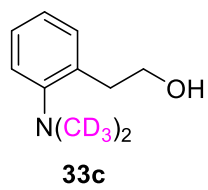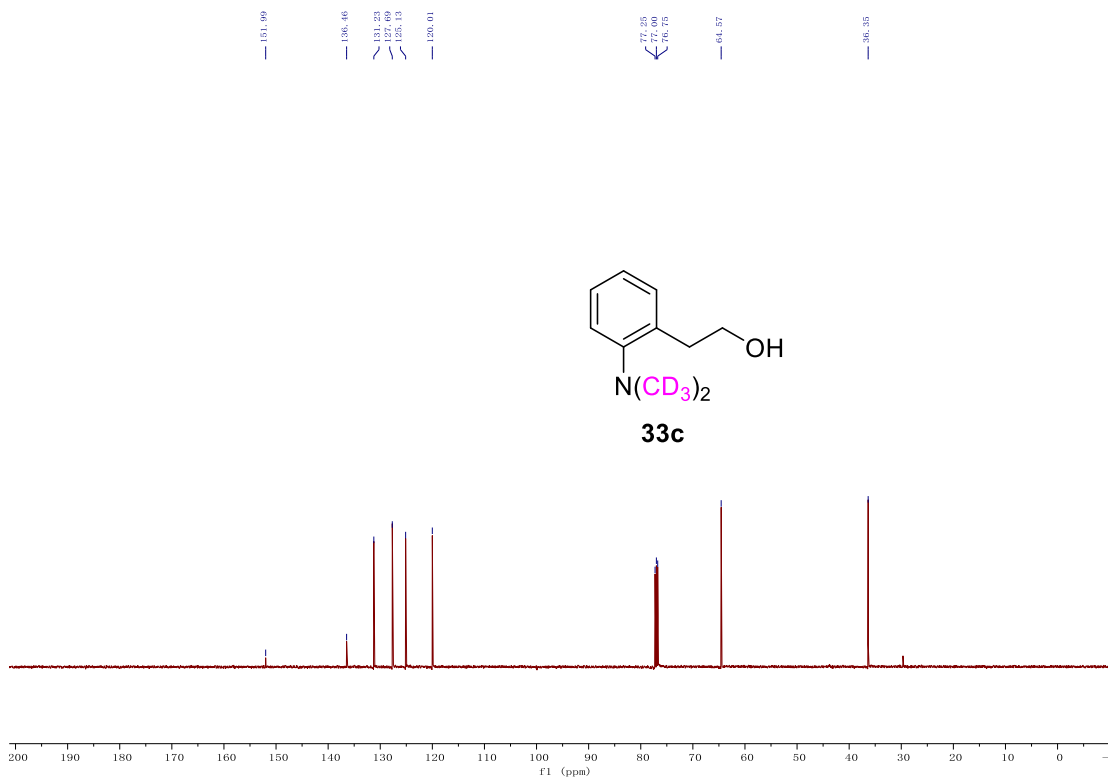

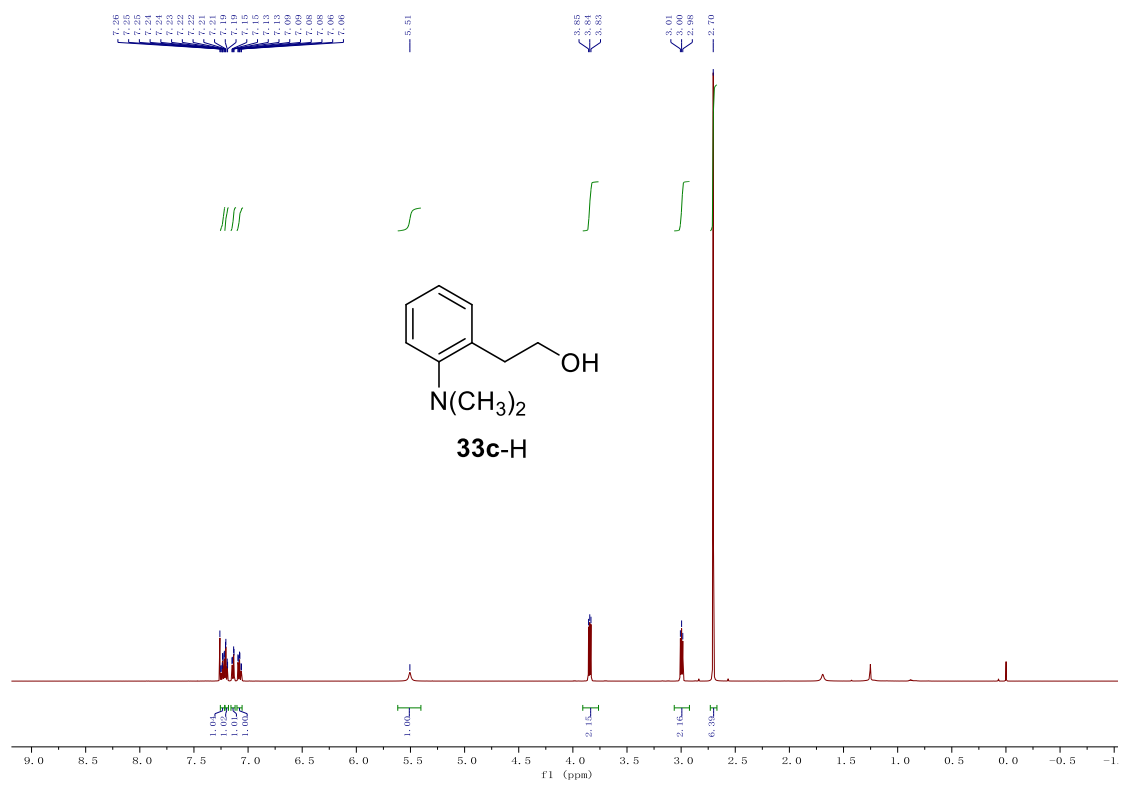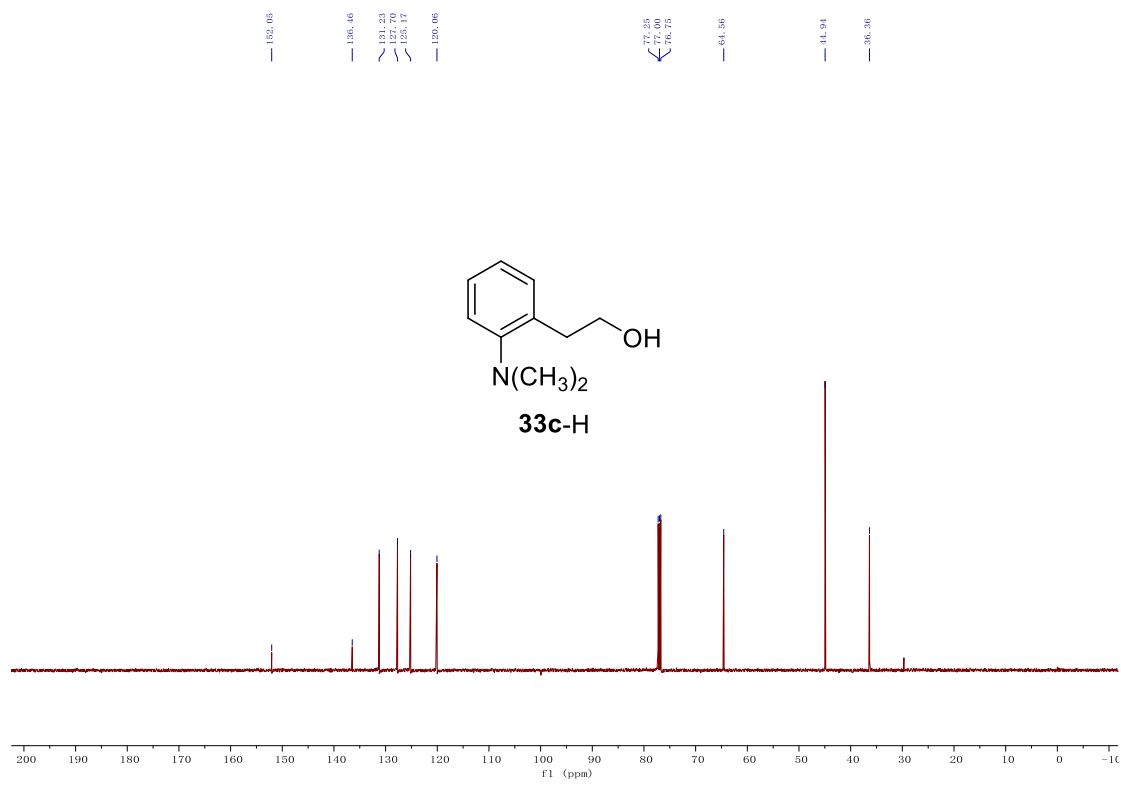

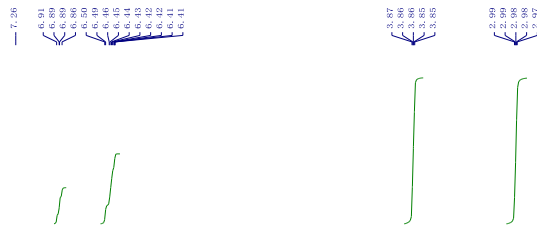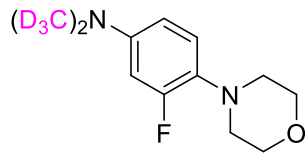

**33d**

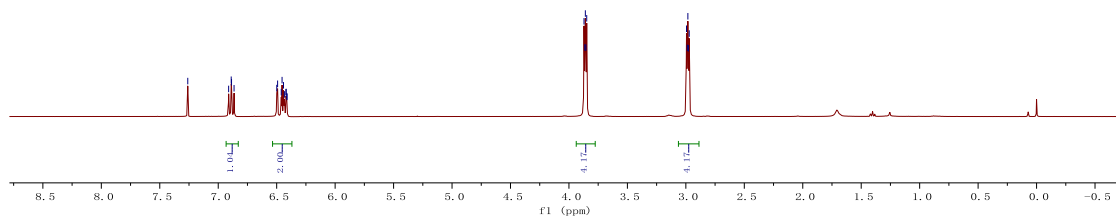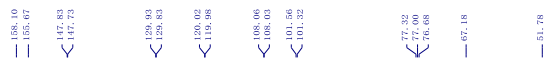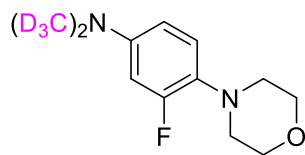

**33d**

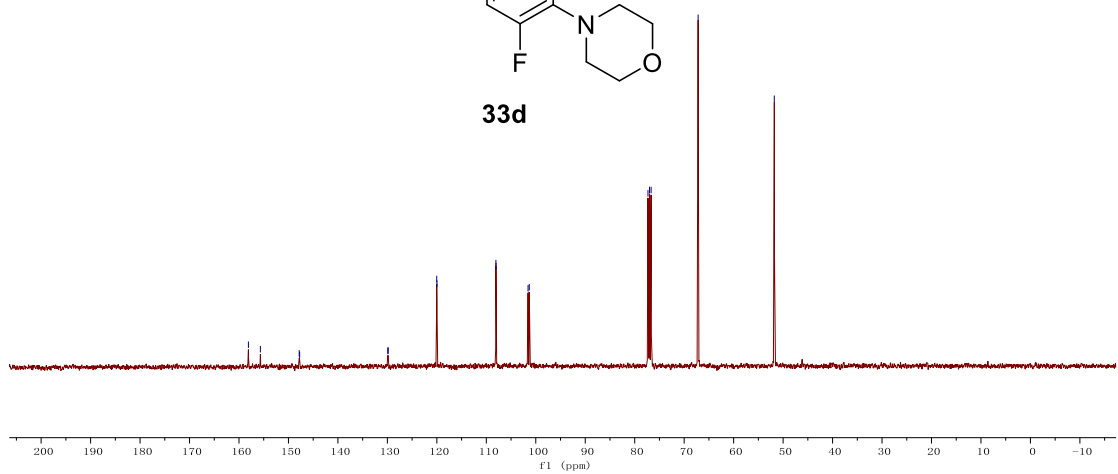



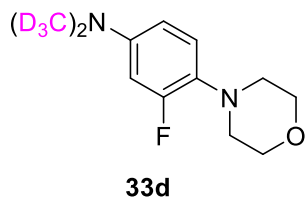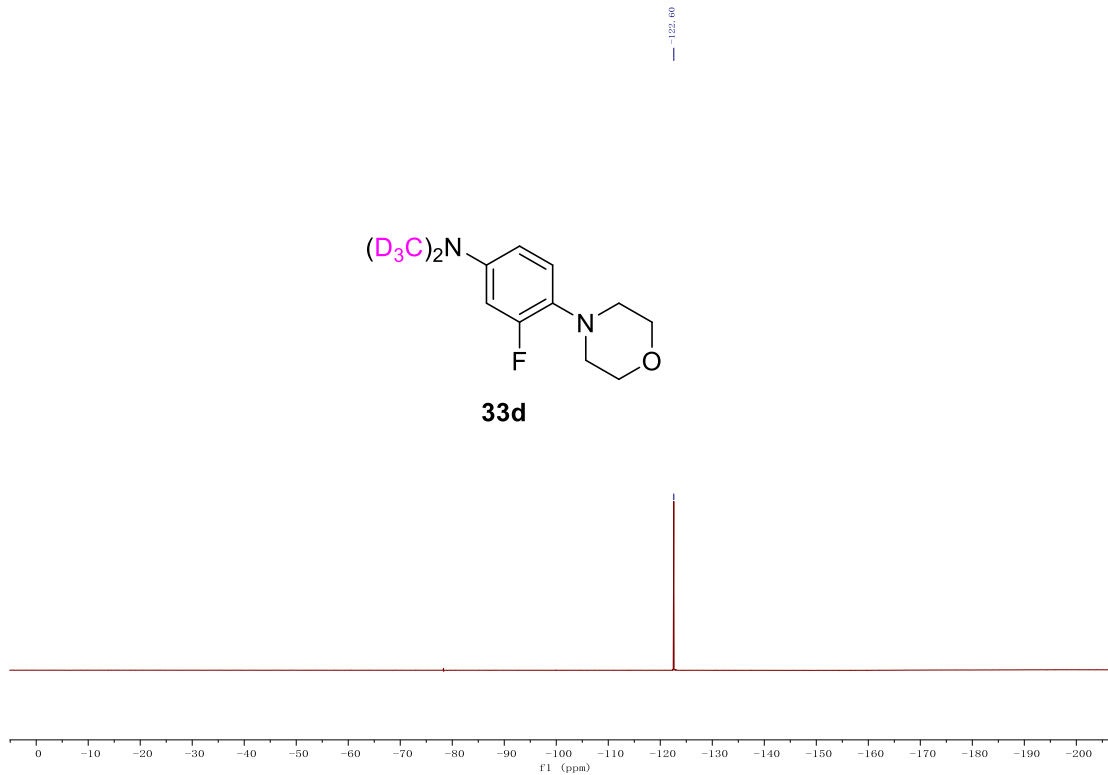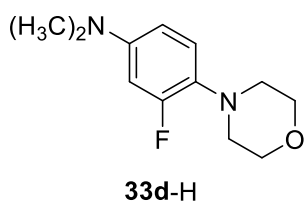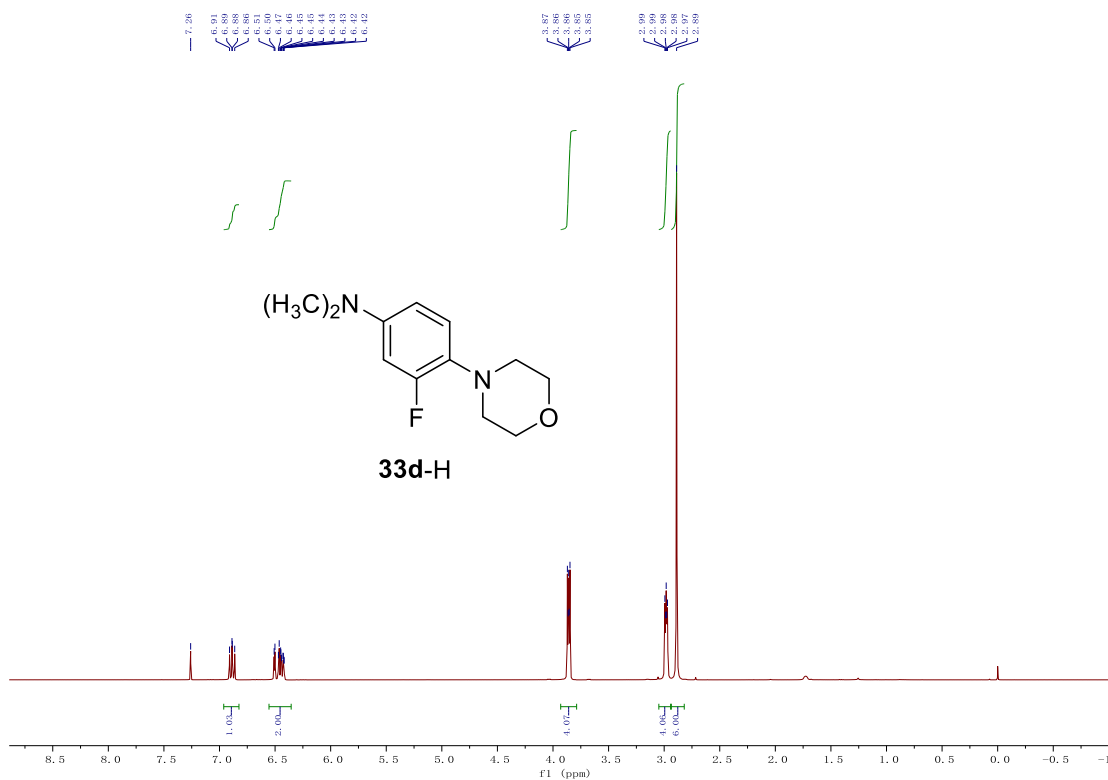

159.87  
 158.64  
 147.76  
 147.60  
 129.98  
 129.88  
 119.99  
 119.74  
 108.12  
 108.09  
 101.82  
 101.38  
 77.52  
 77.00  
 76.68  
 67.17  
 51.78  
 51.75  
 40.80

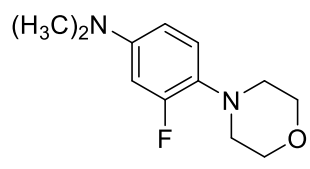

**33d-H**

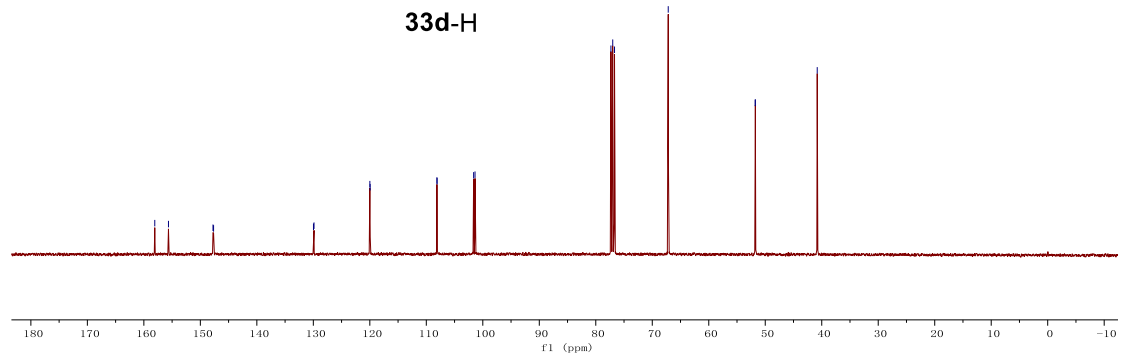

122.57

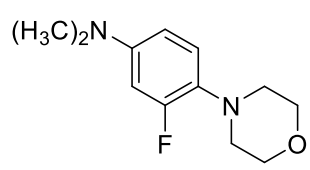

**33d-H**

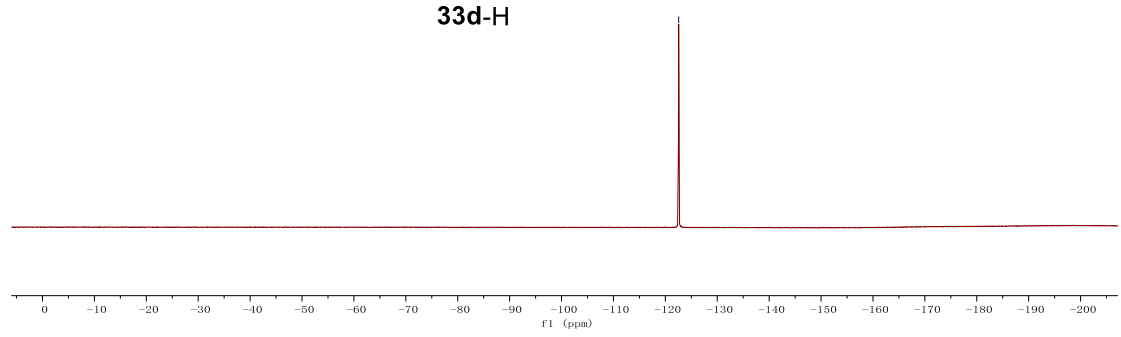





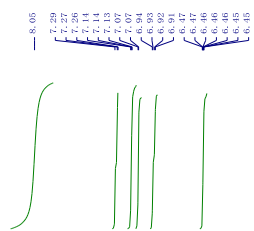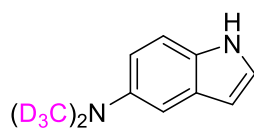

**33f**

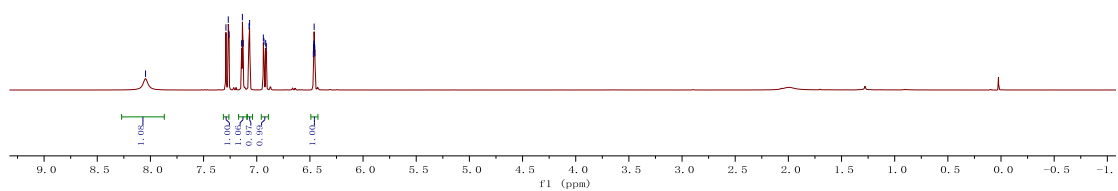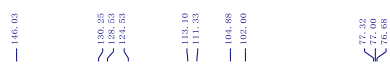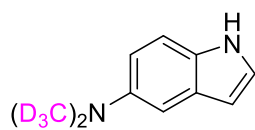

**33f**

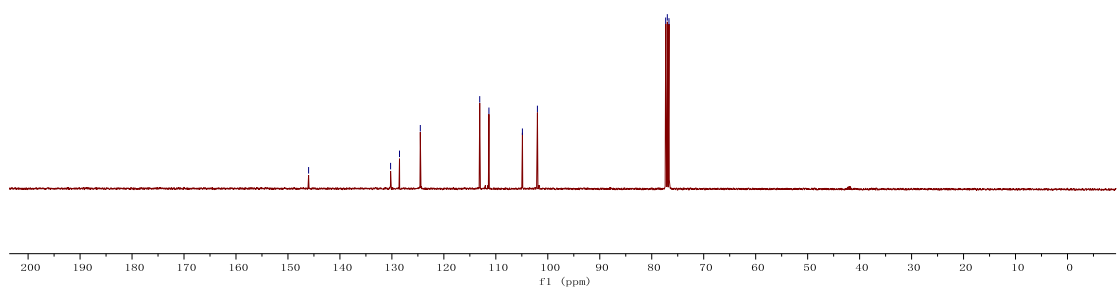

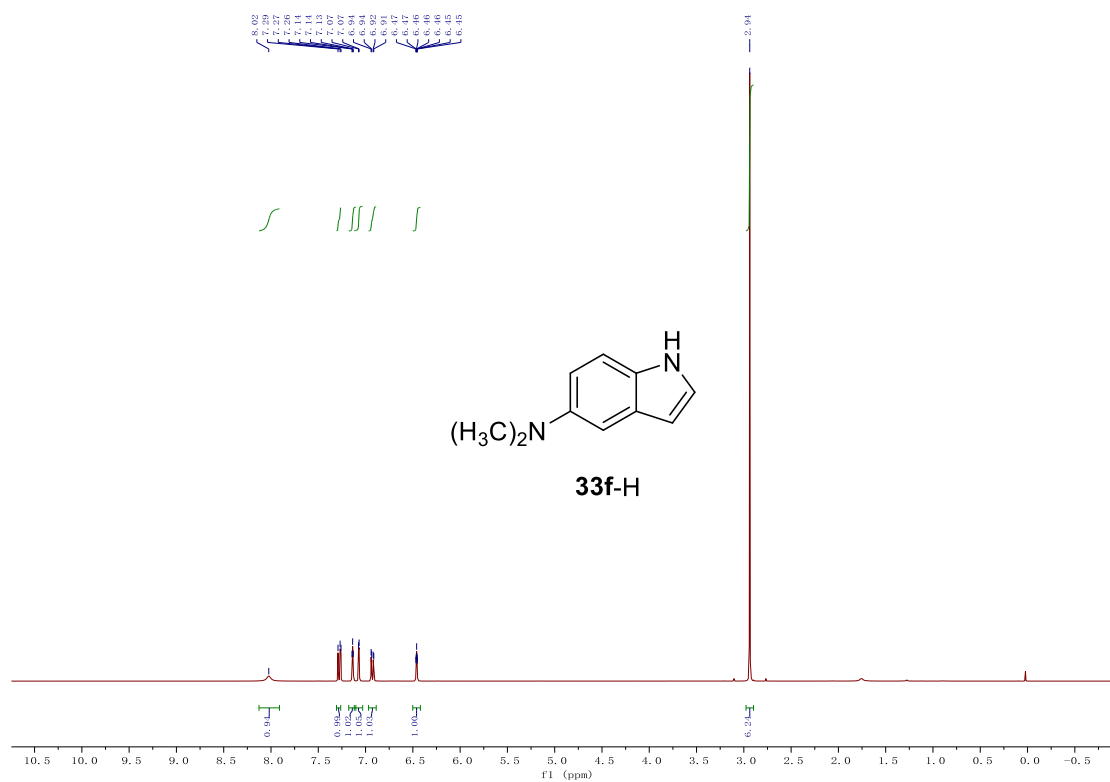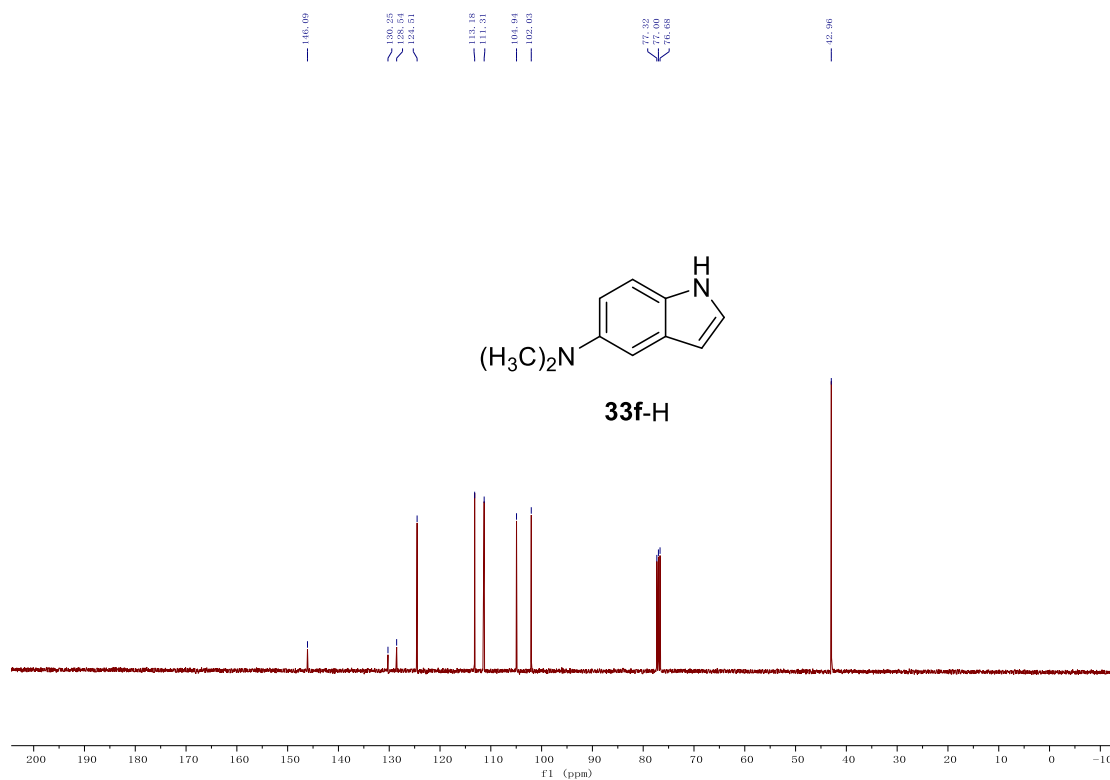

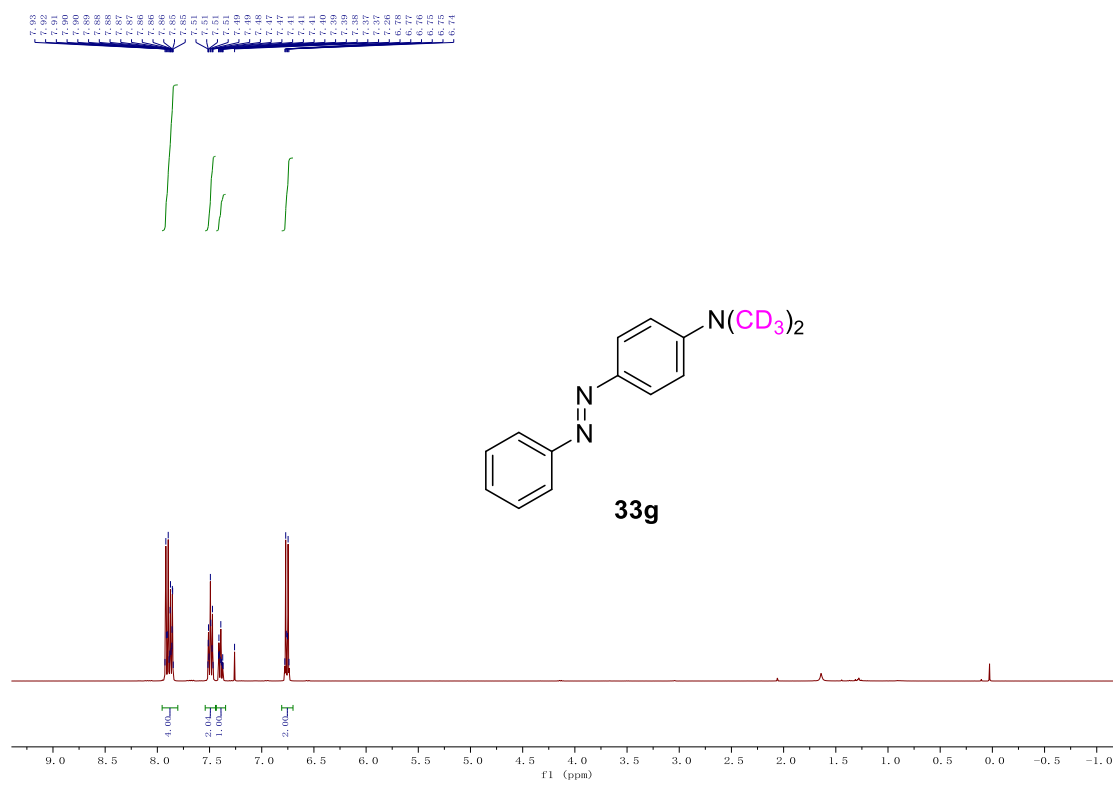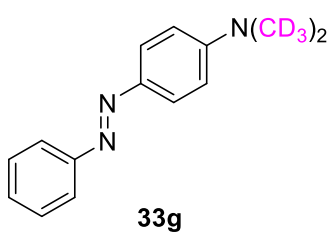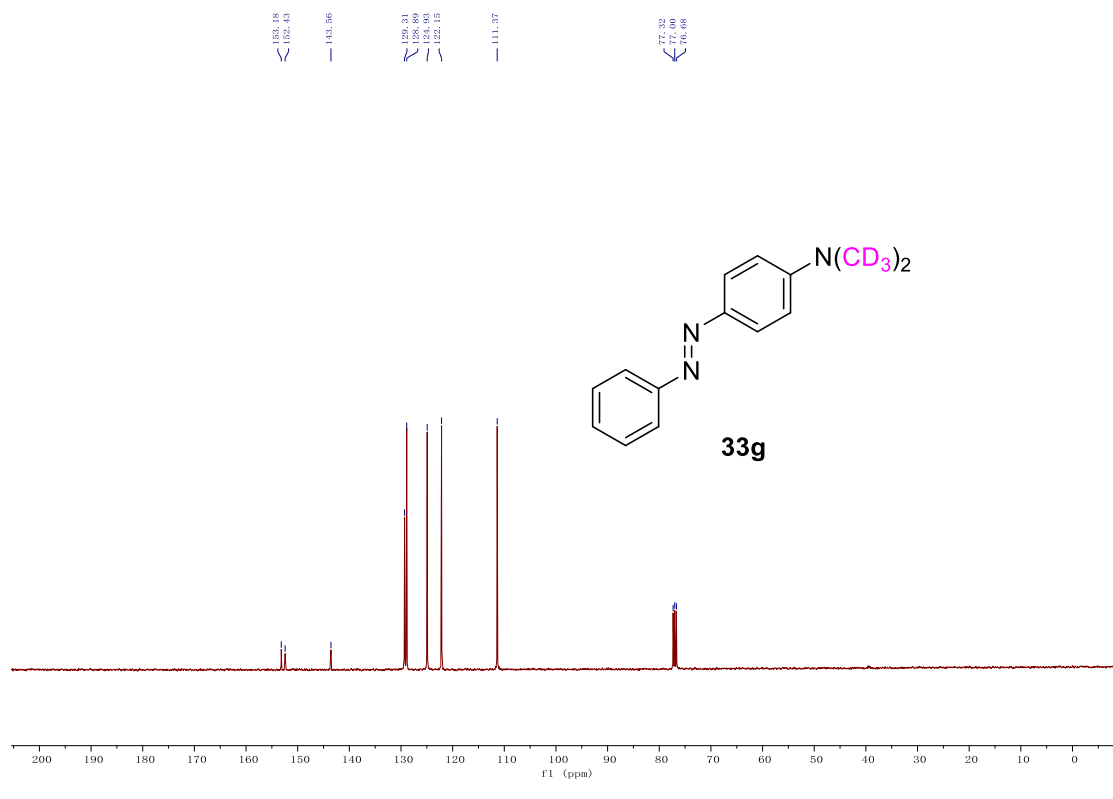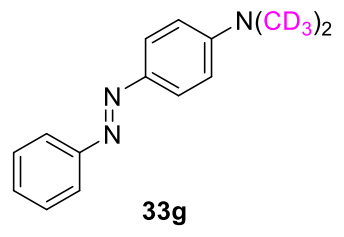

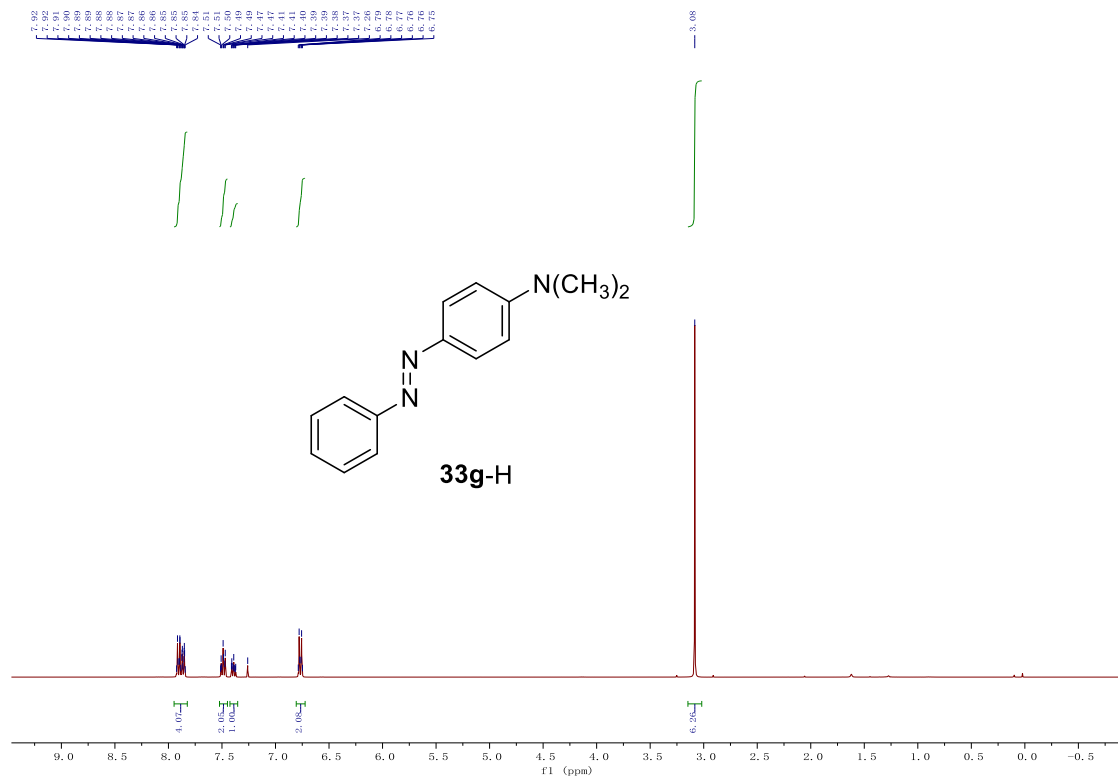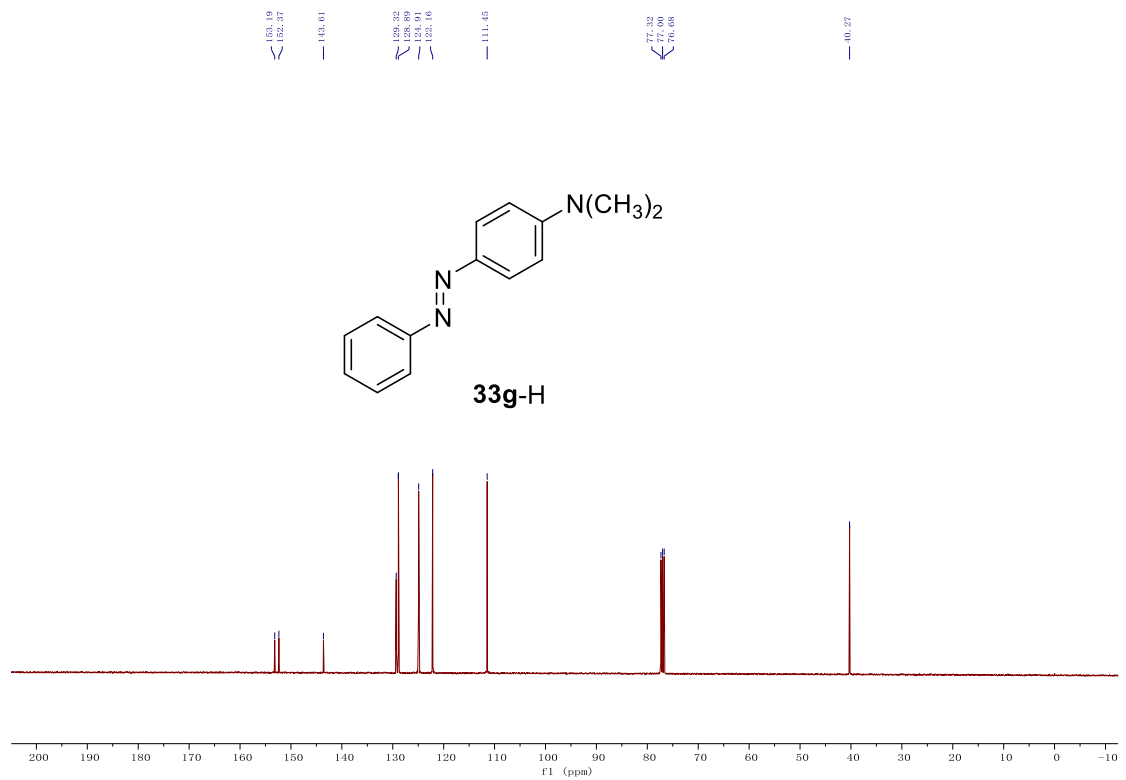



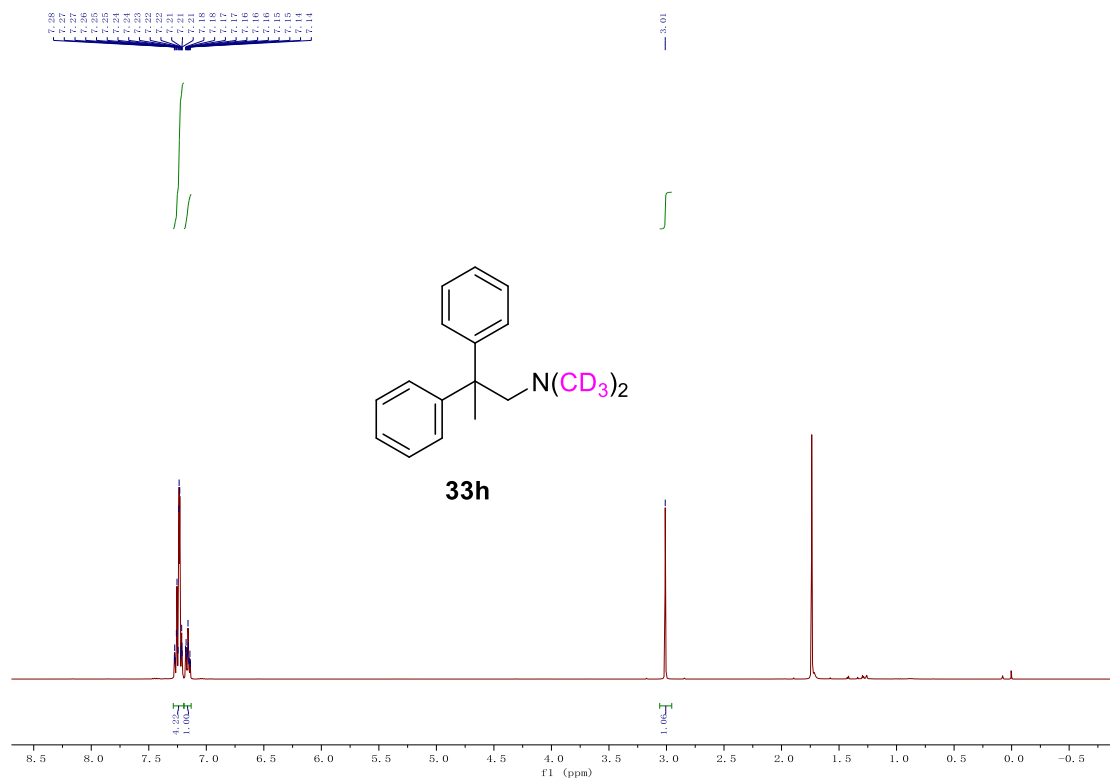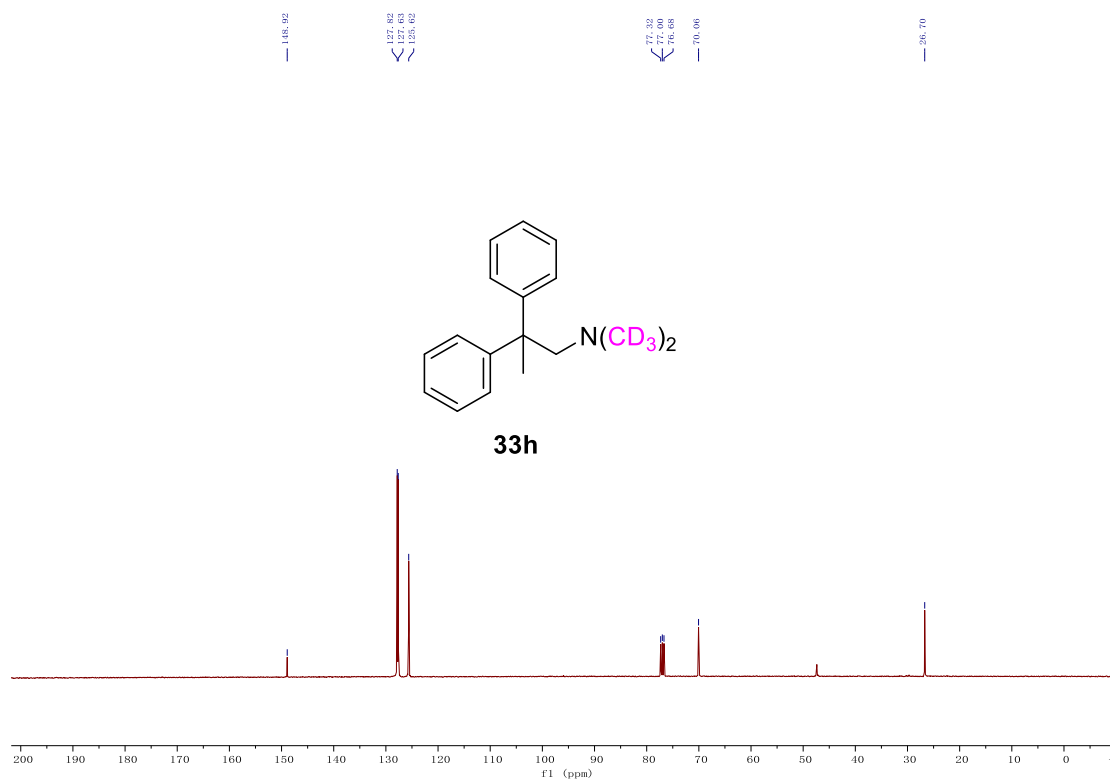

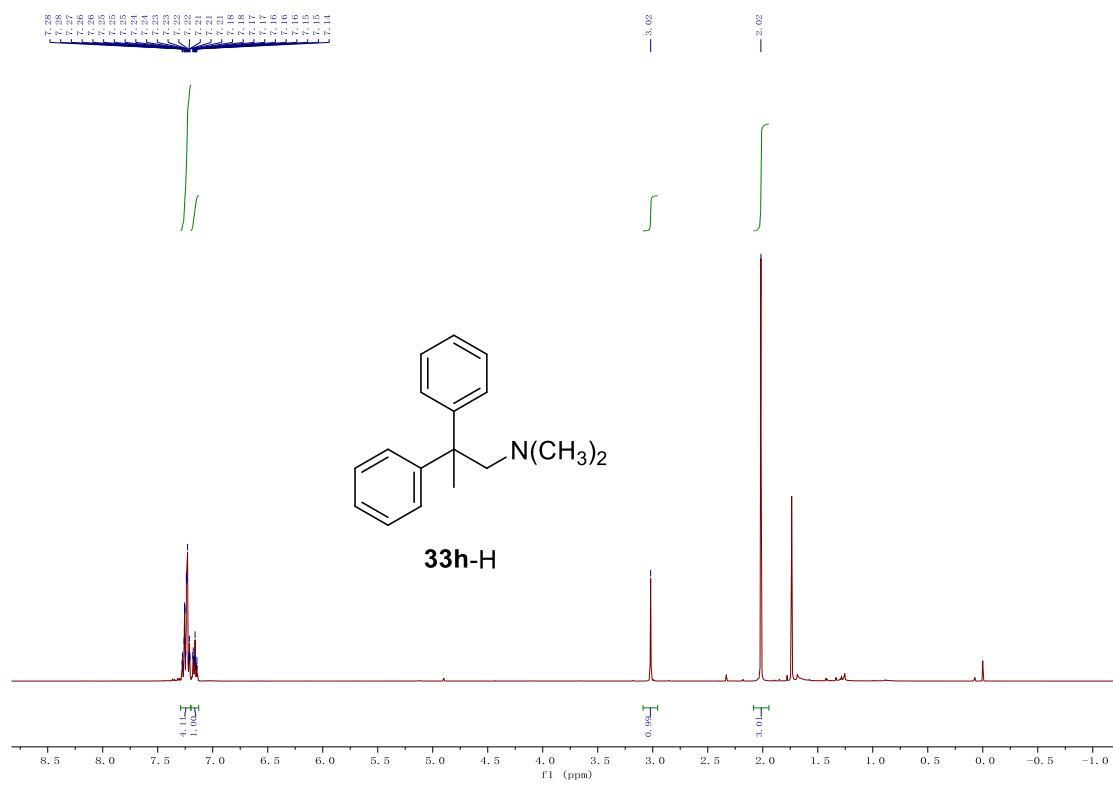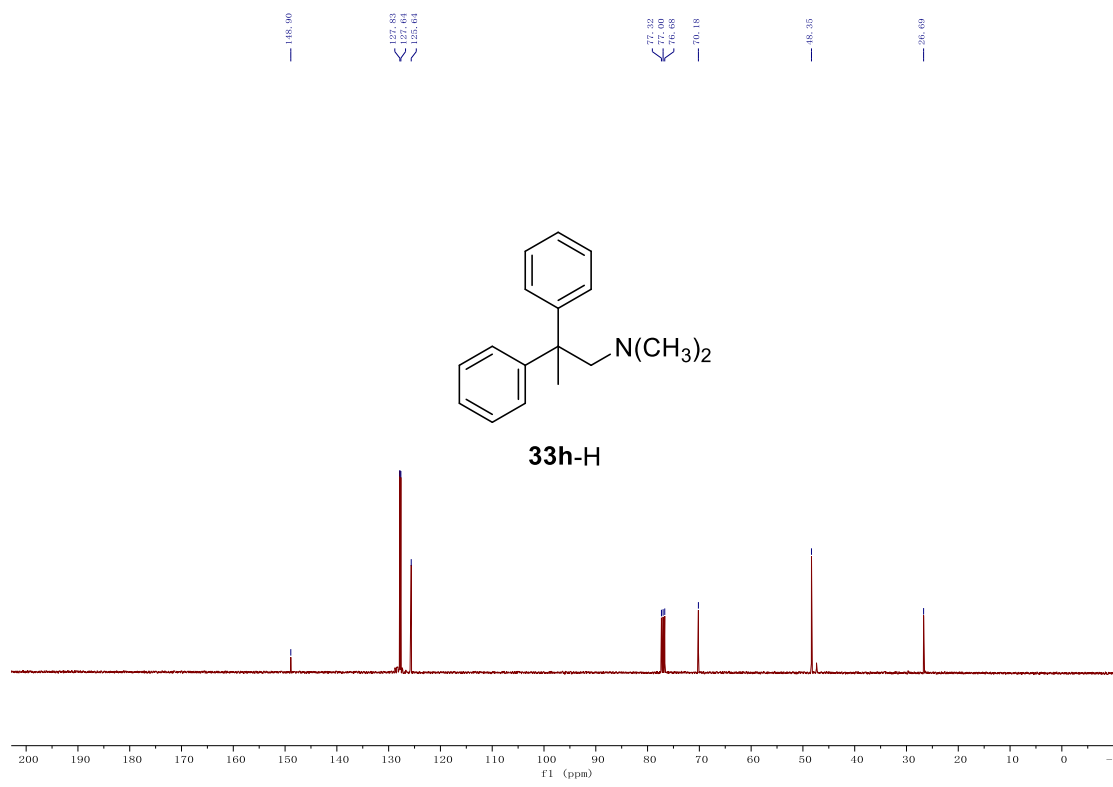

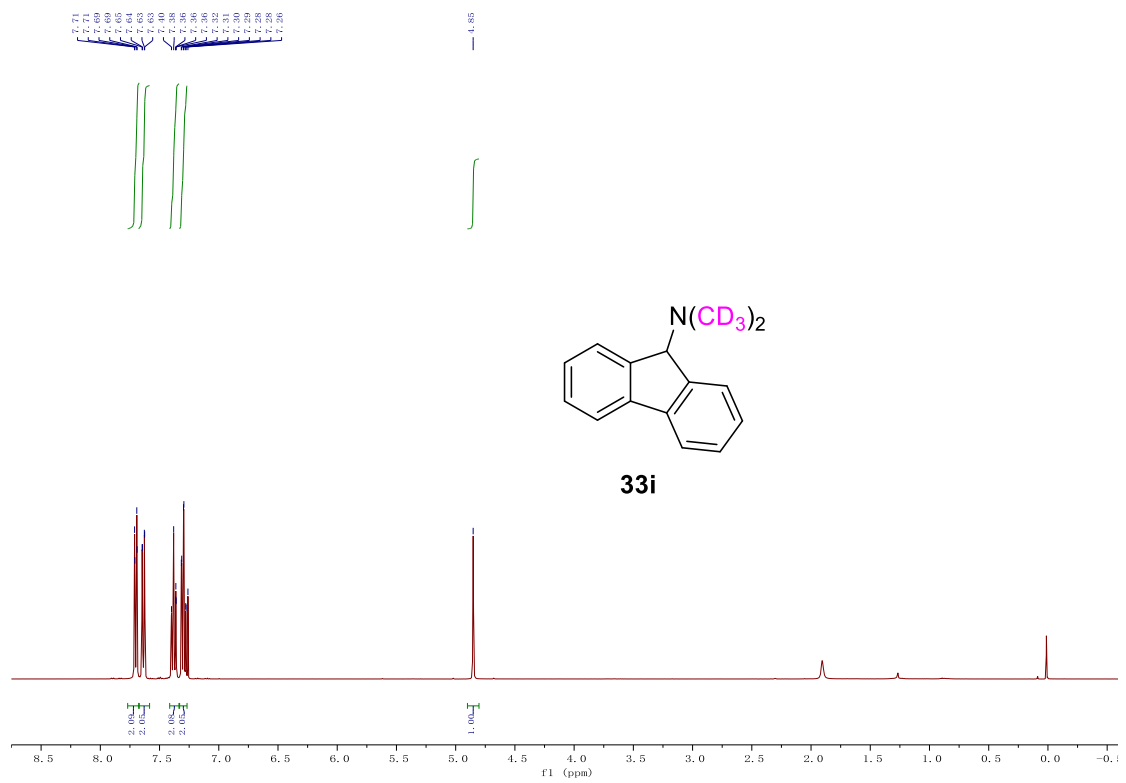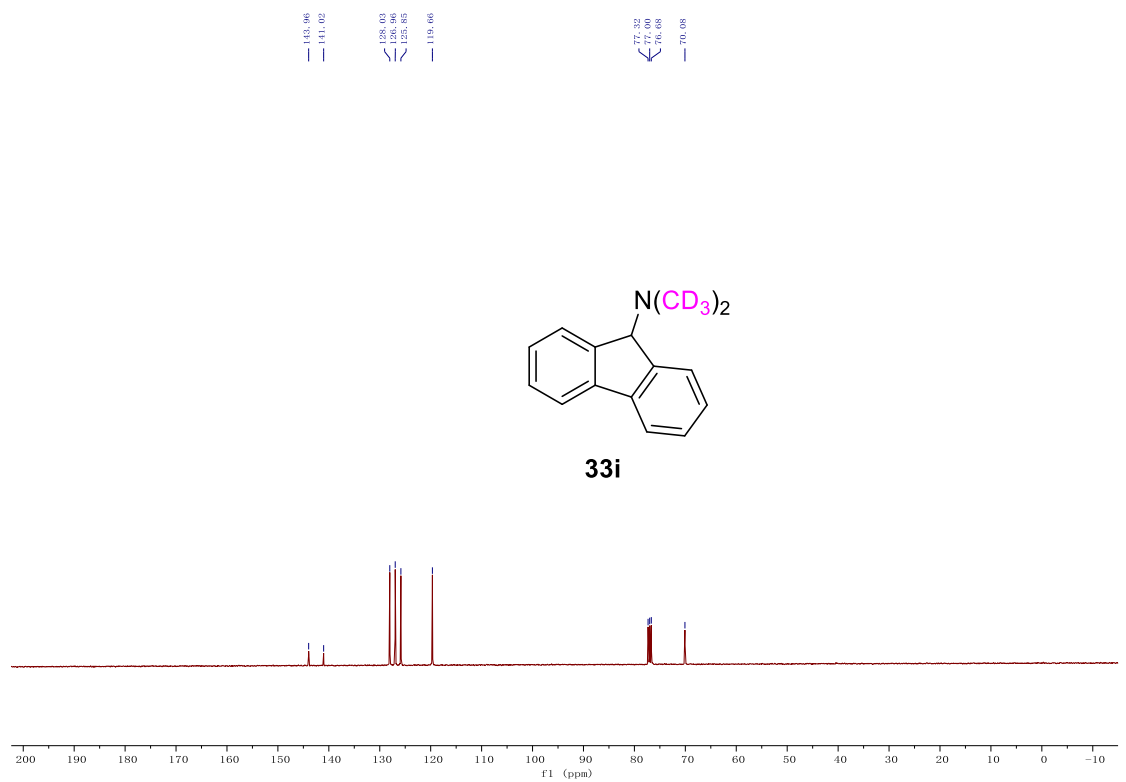

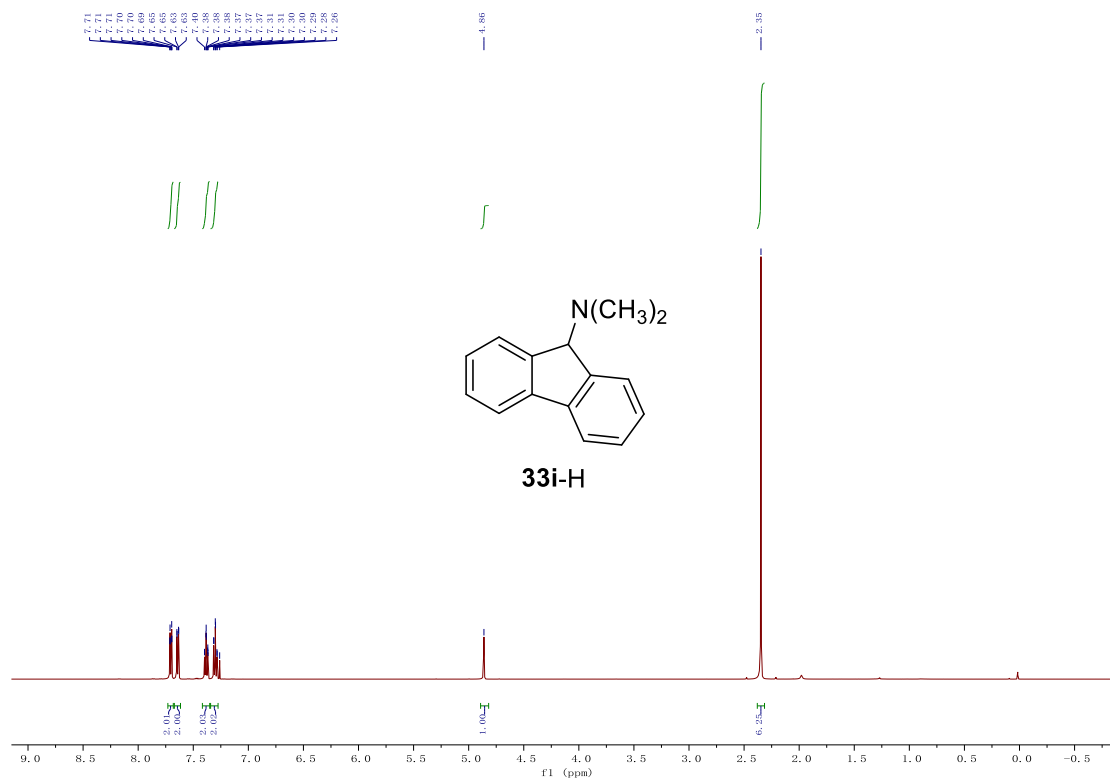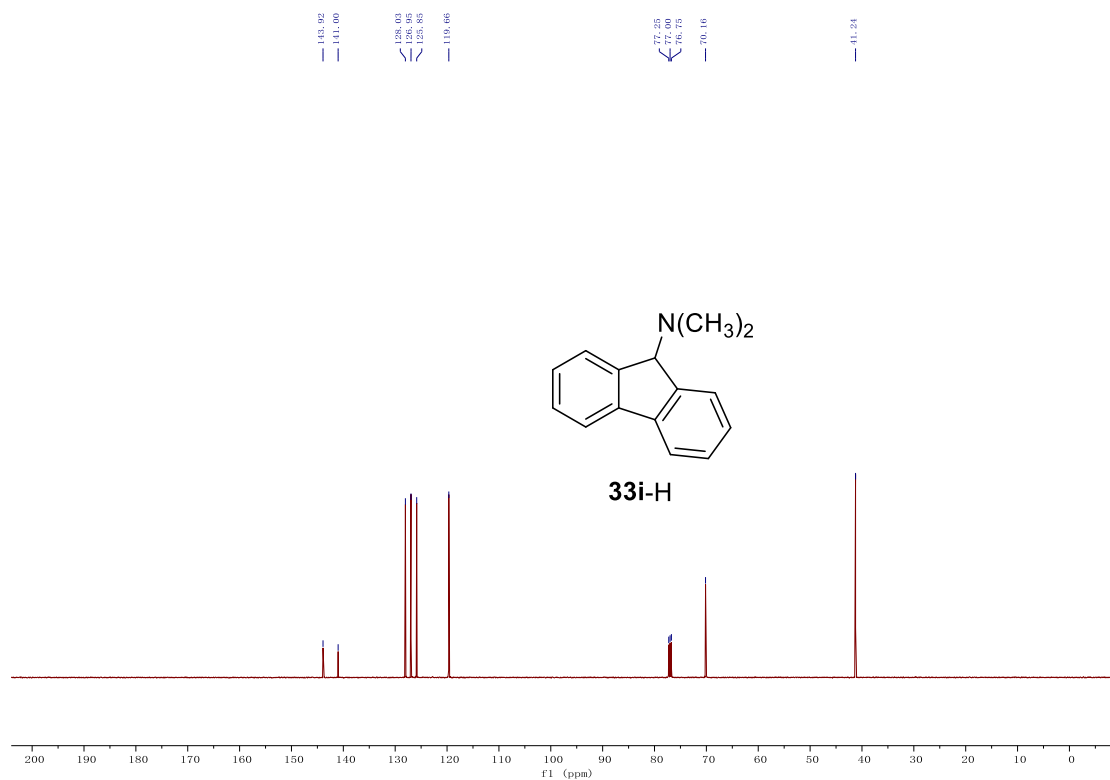

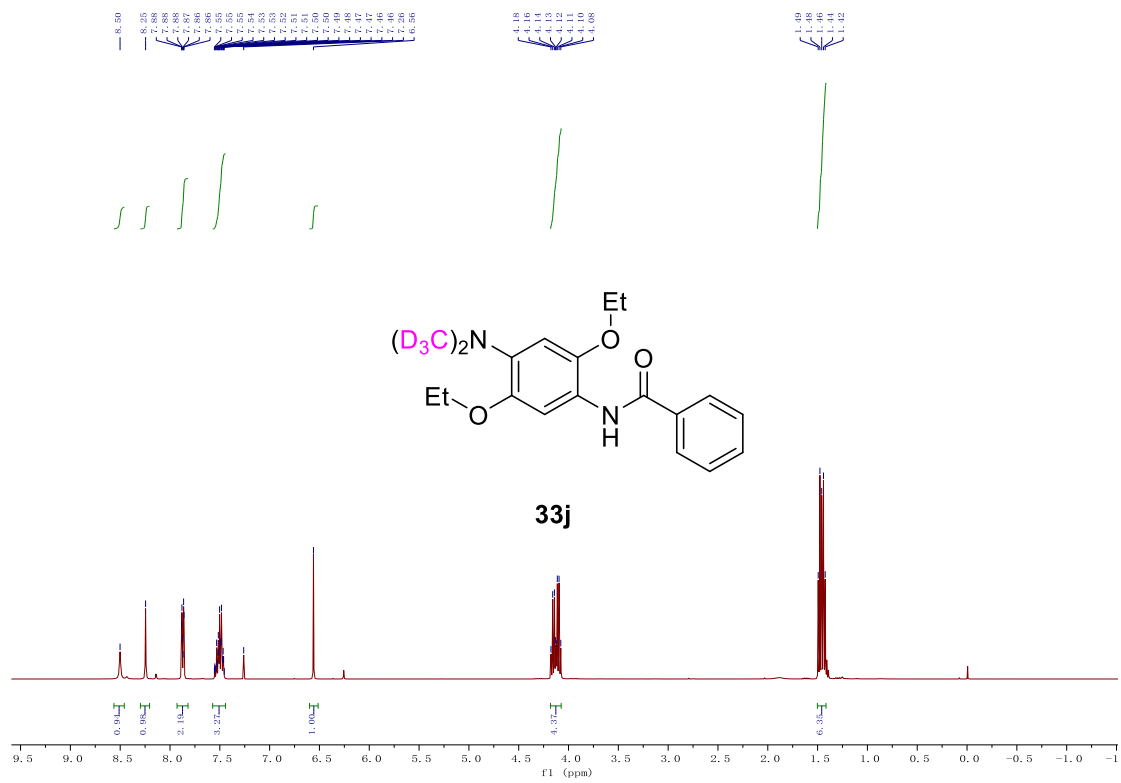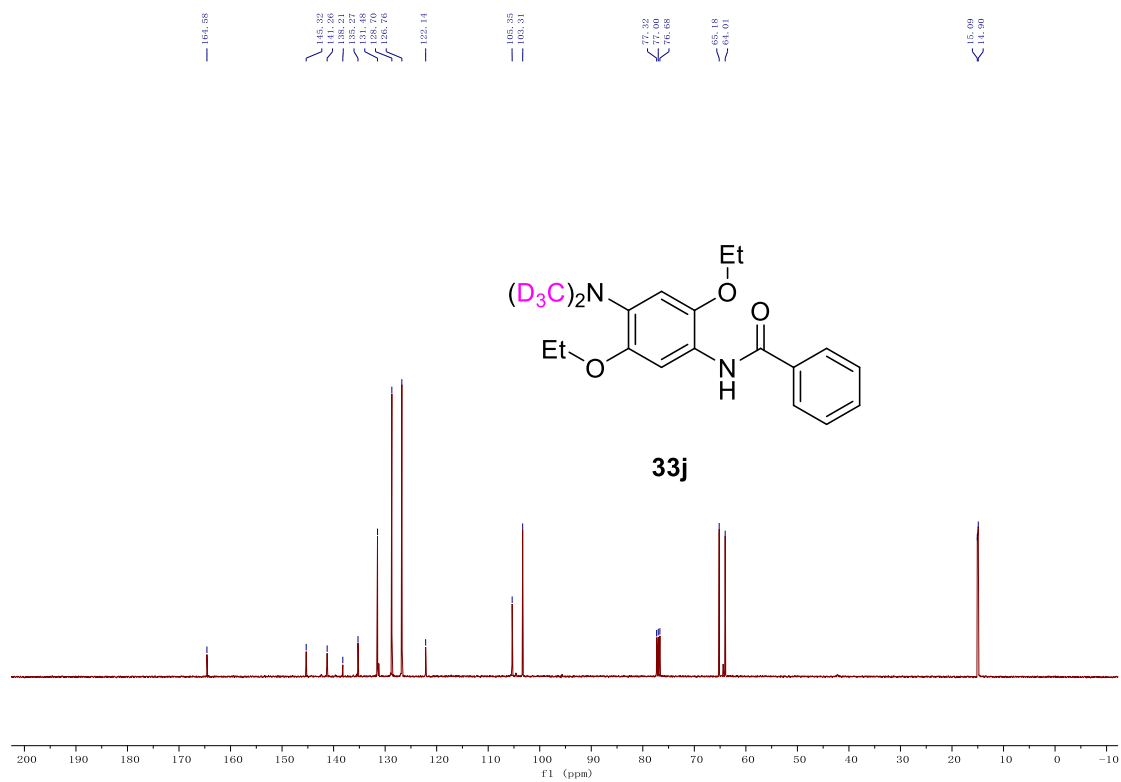

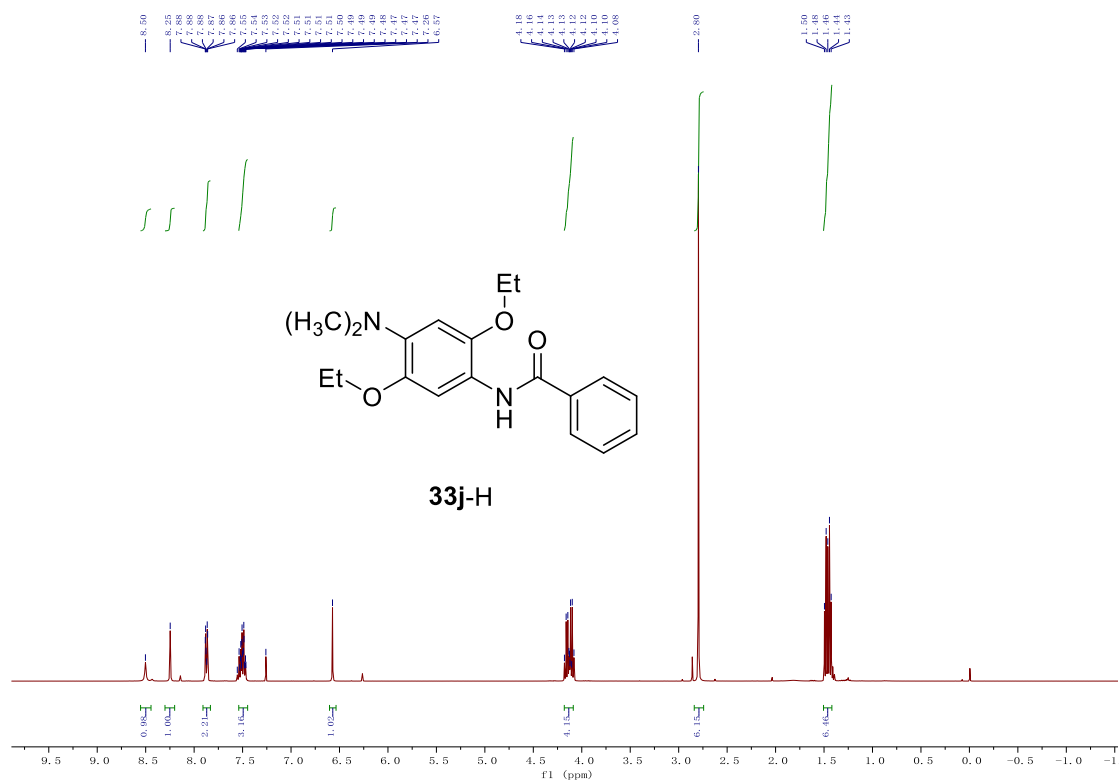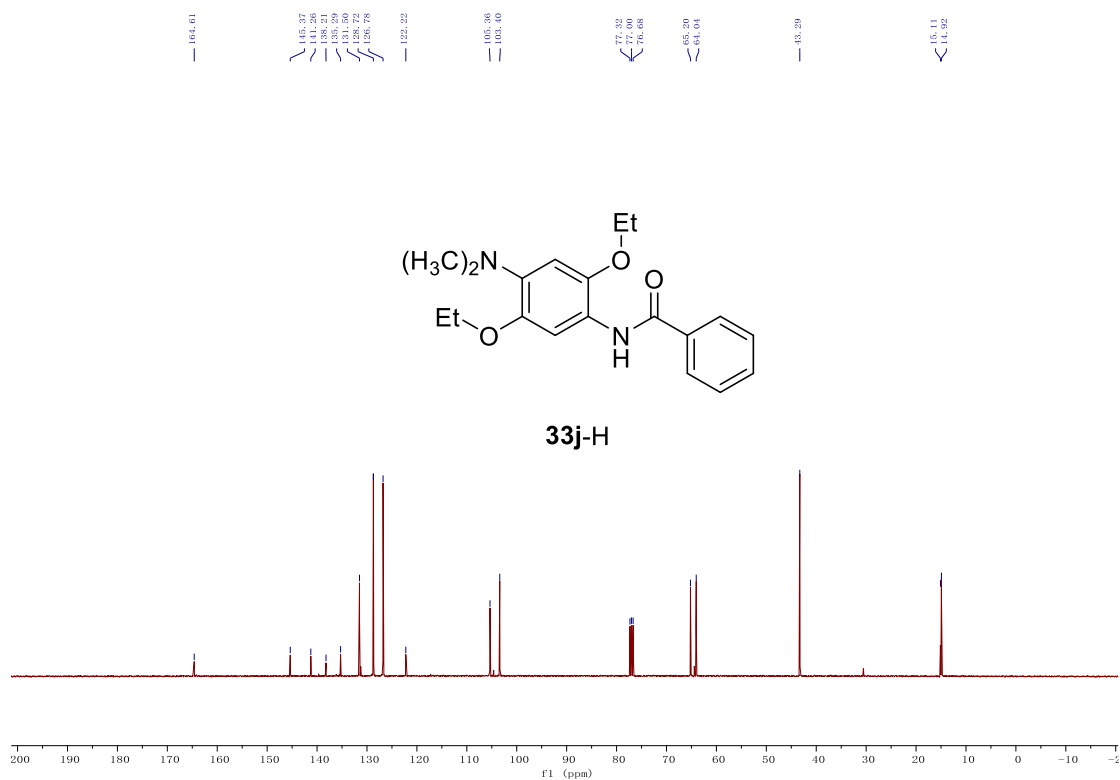

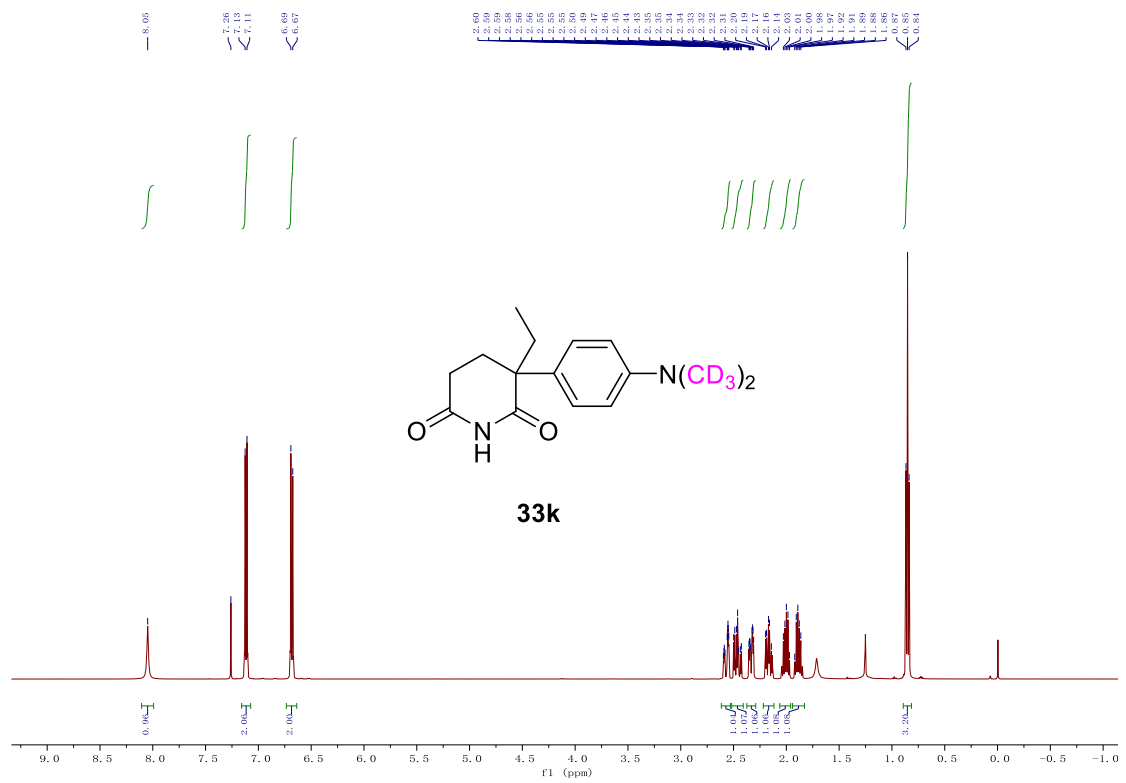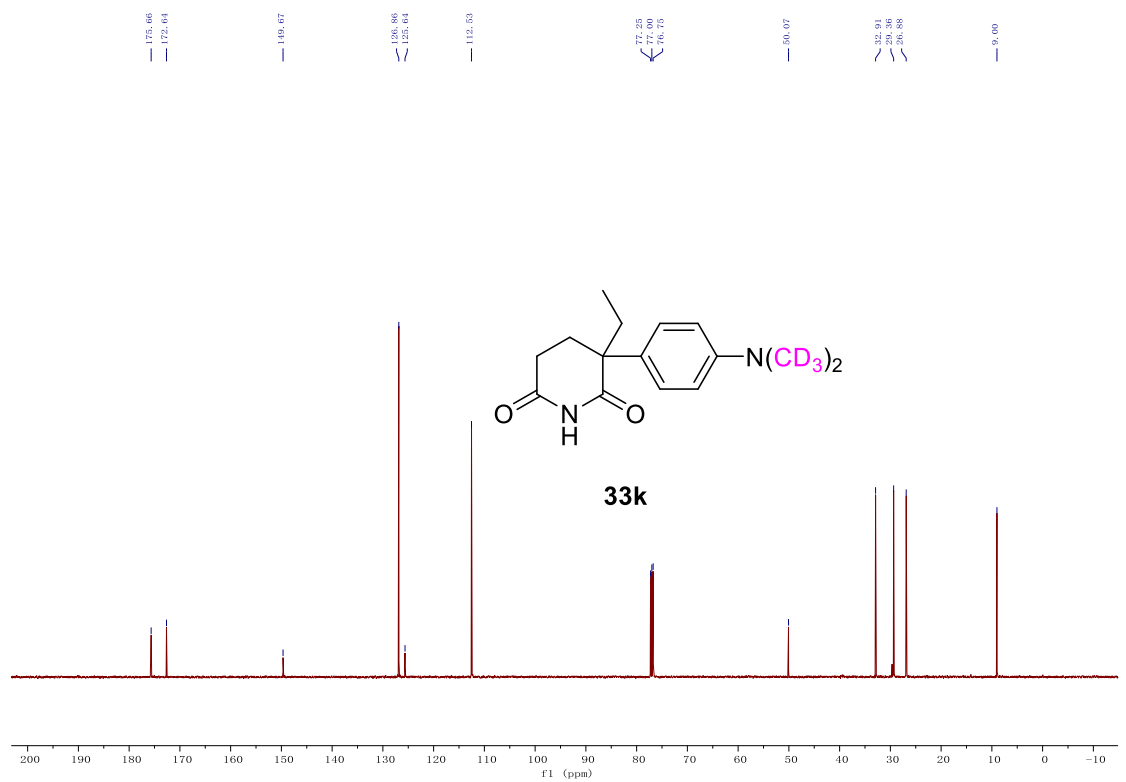

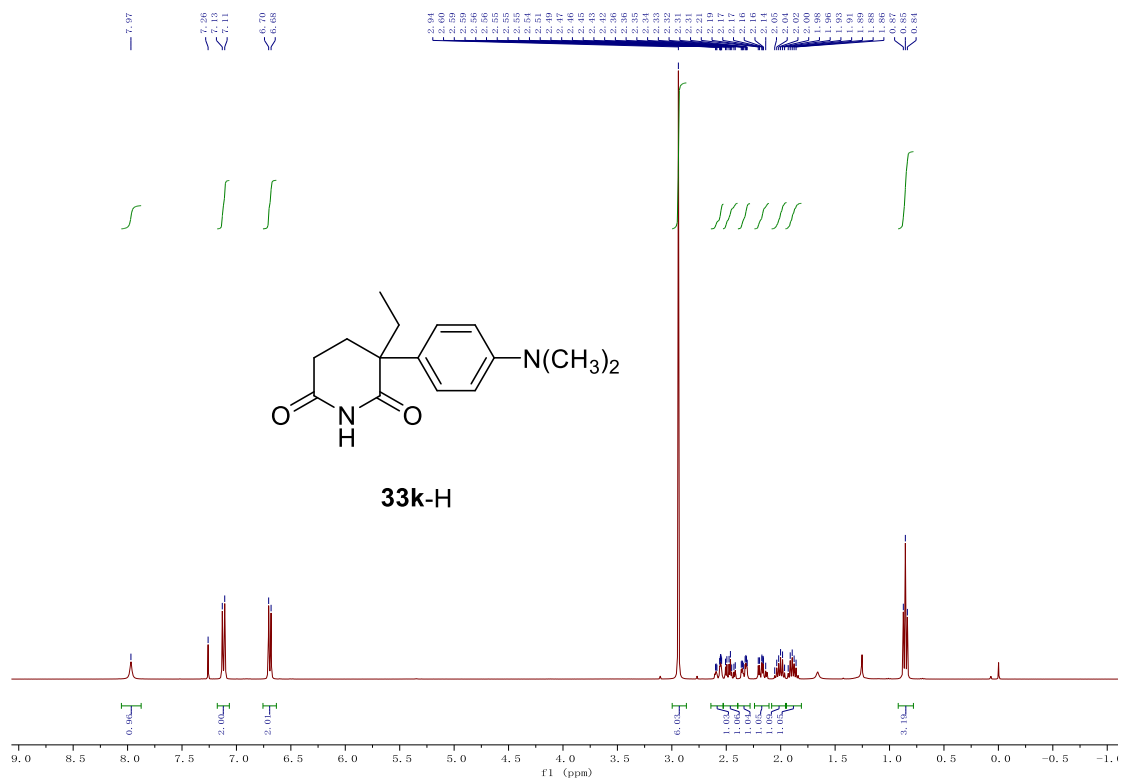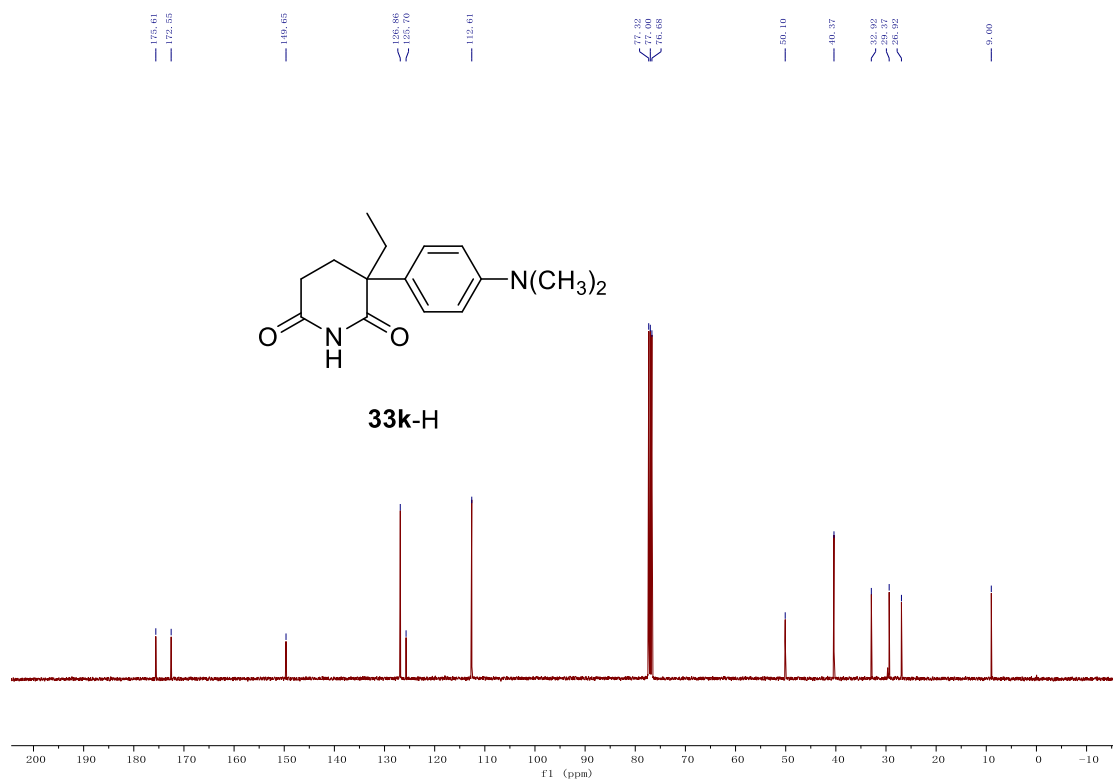



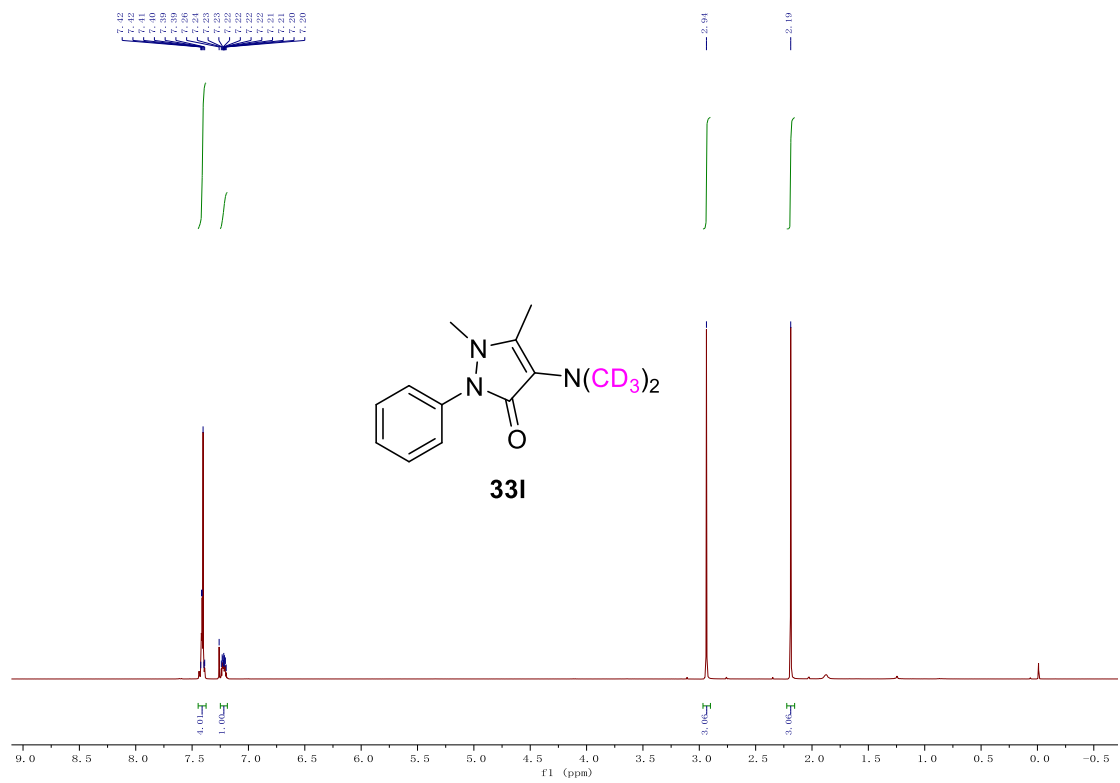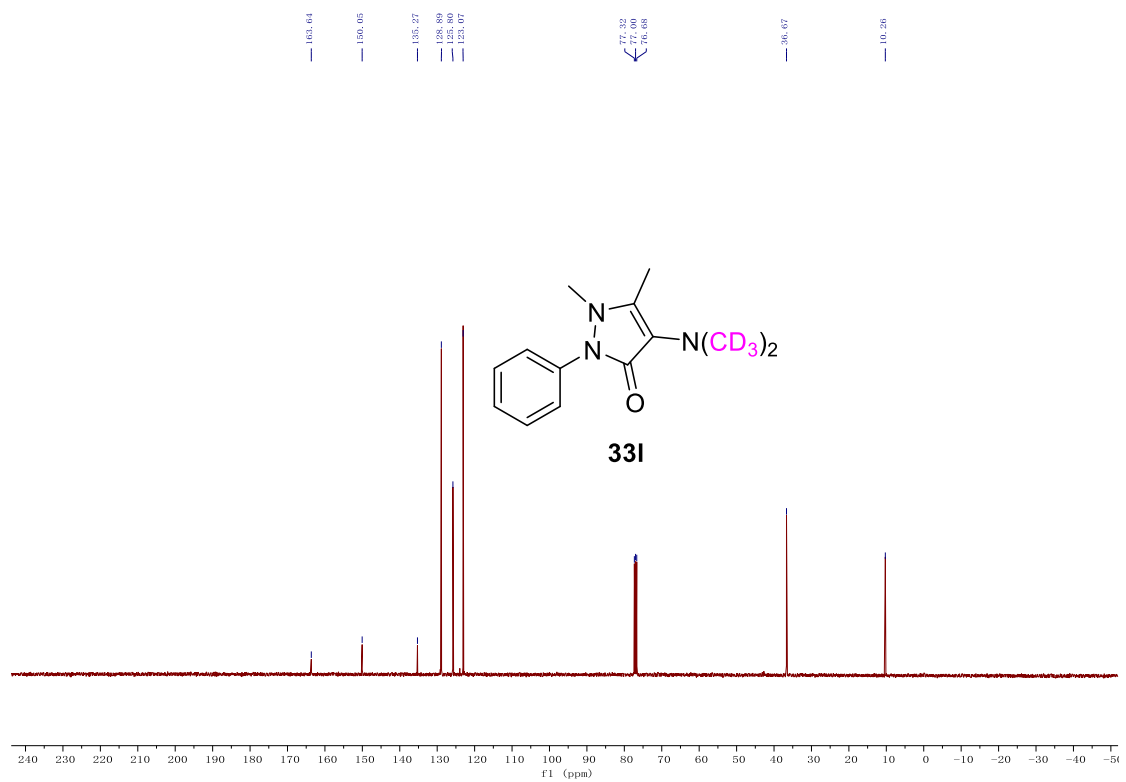

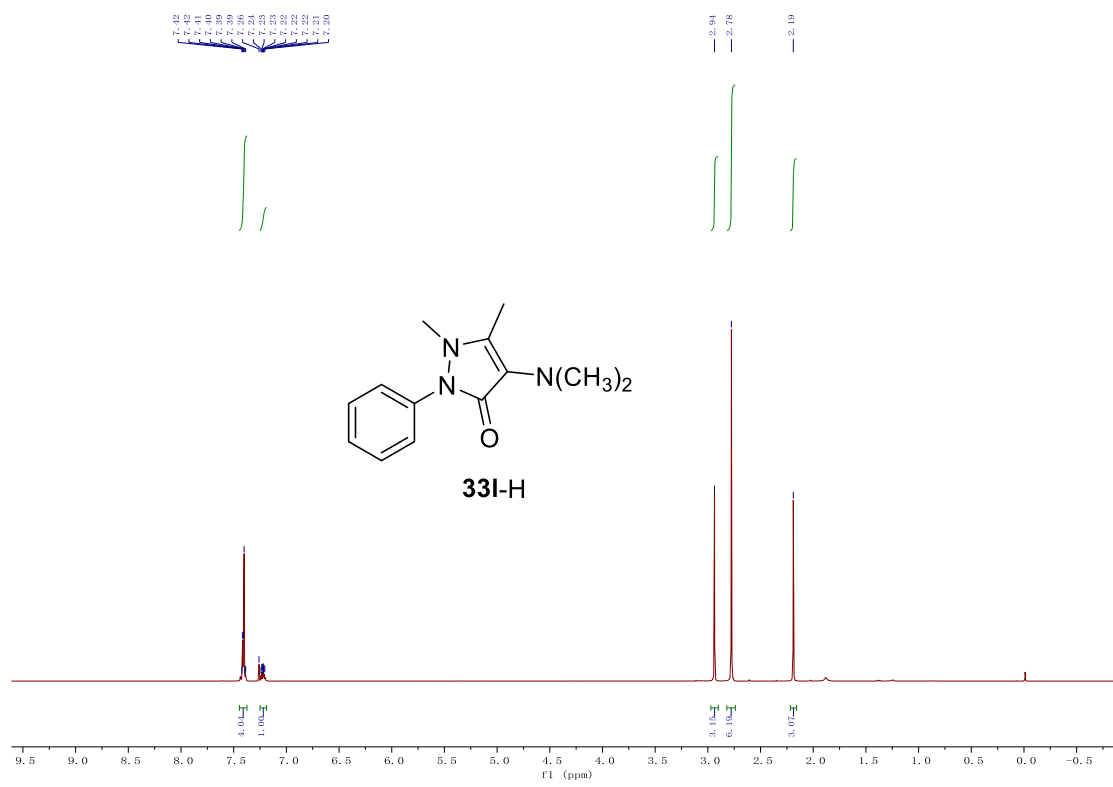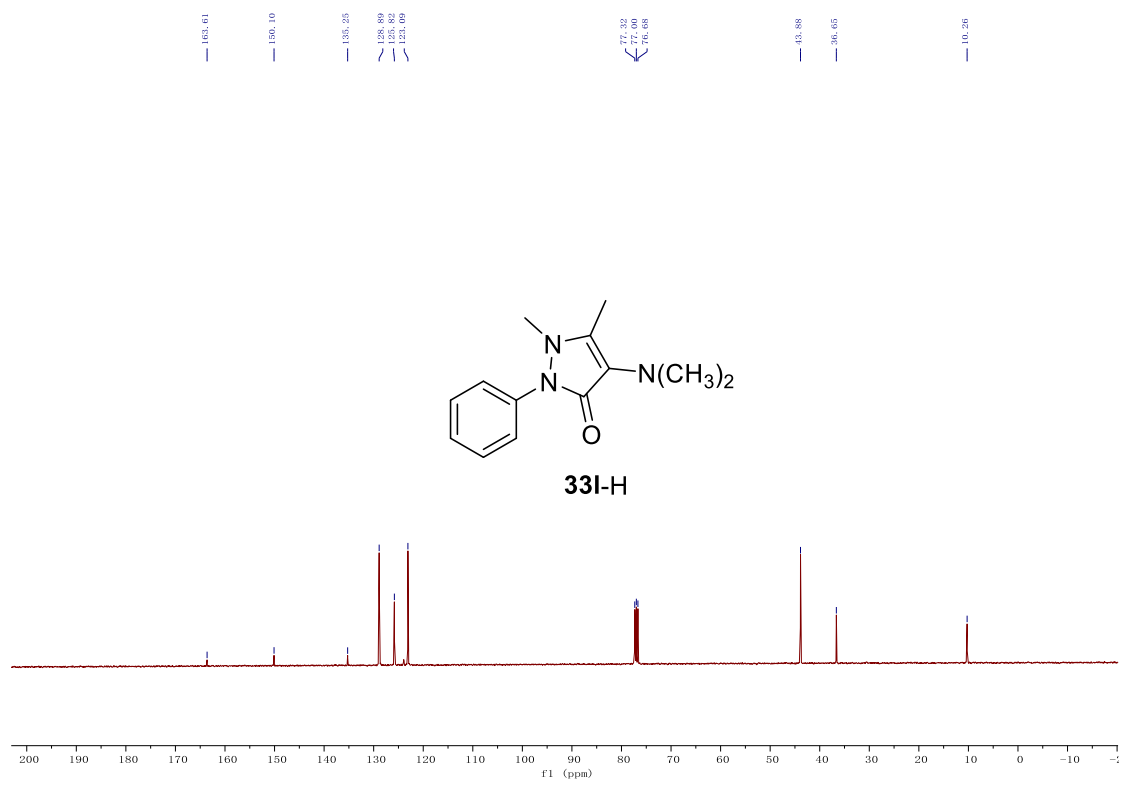

7.322  
7.311  
7.300  
7.289  
7.279  
7.268  
7.258  
7.066  
7.065  
7.055  
7.044  
6.999  
6.988  
6.977  
6.967

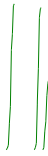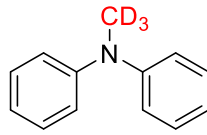

33m

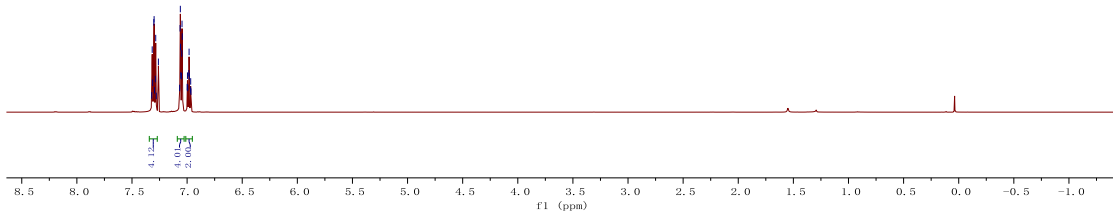

148.97  
128.15  
121.19  
120.38  
77.50  
77.00  
76.50

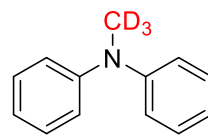

33m

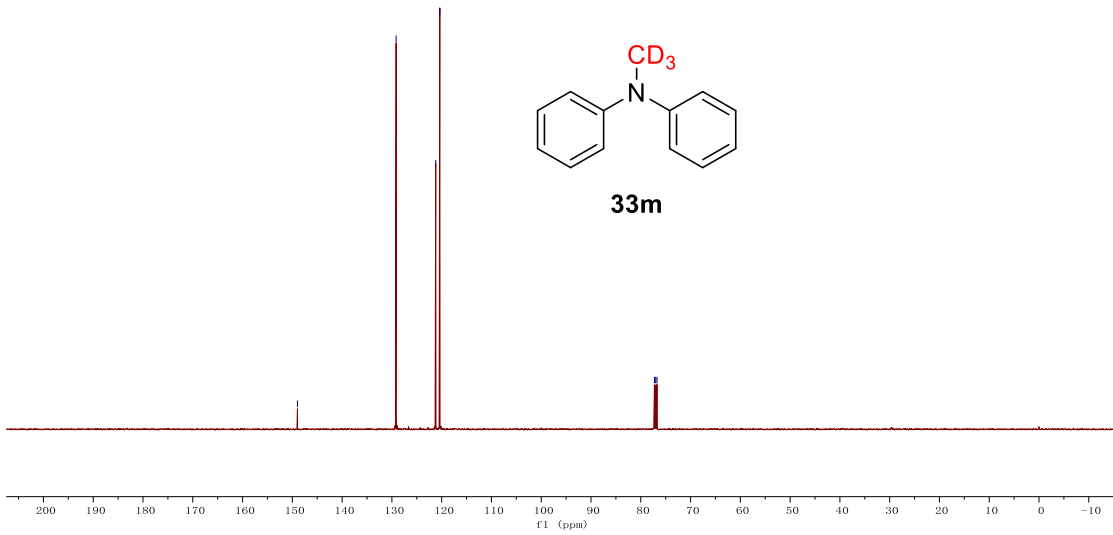

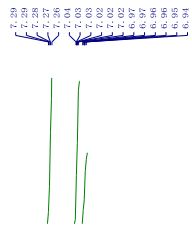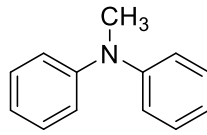

**33m-H**

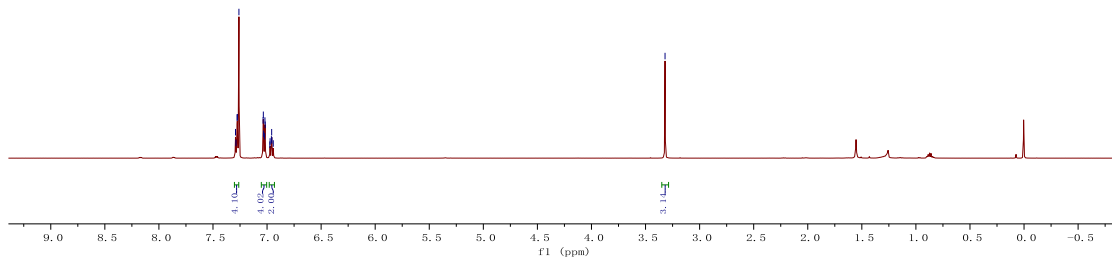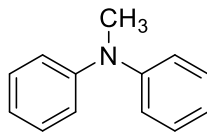

**33m-H**

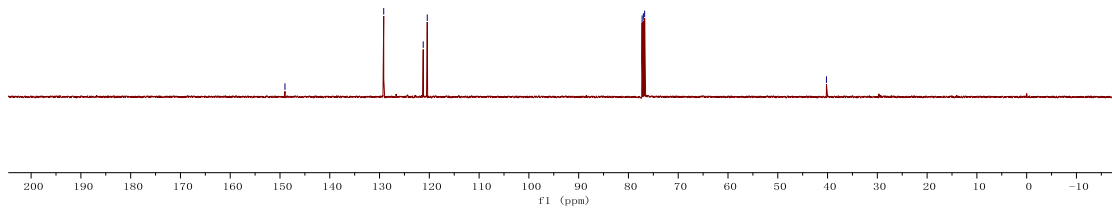

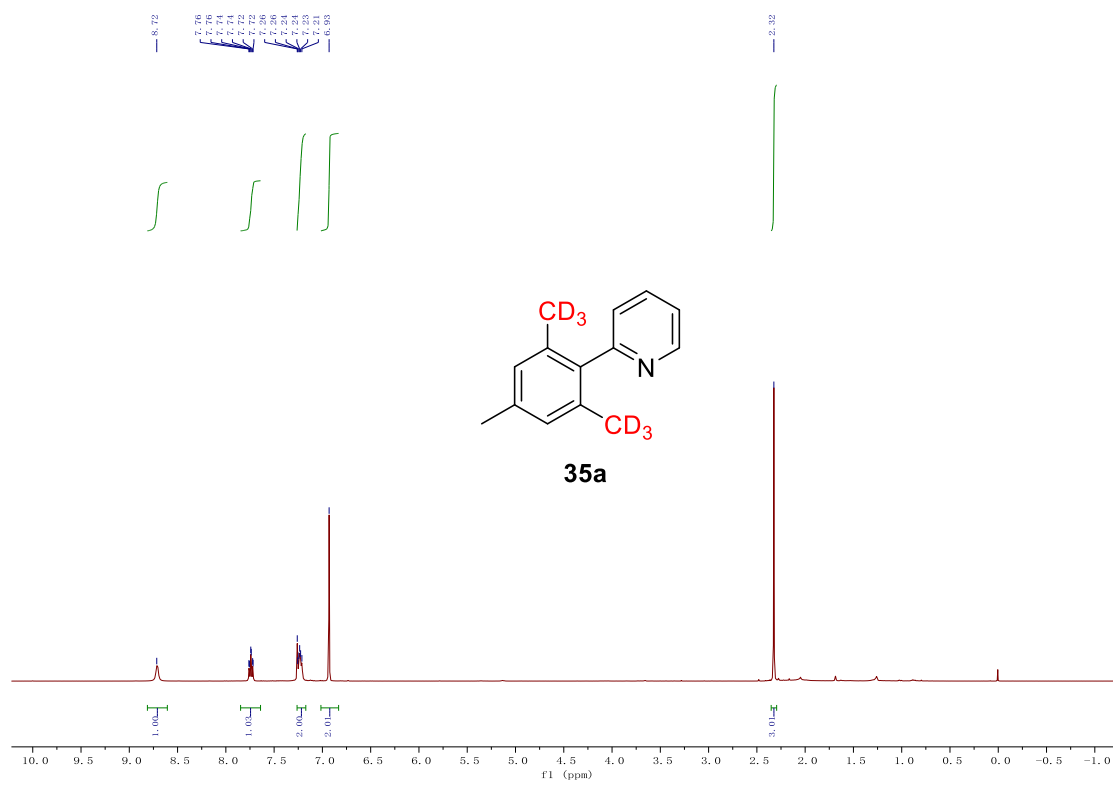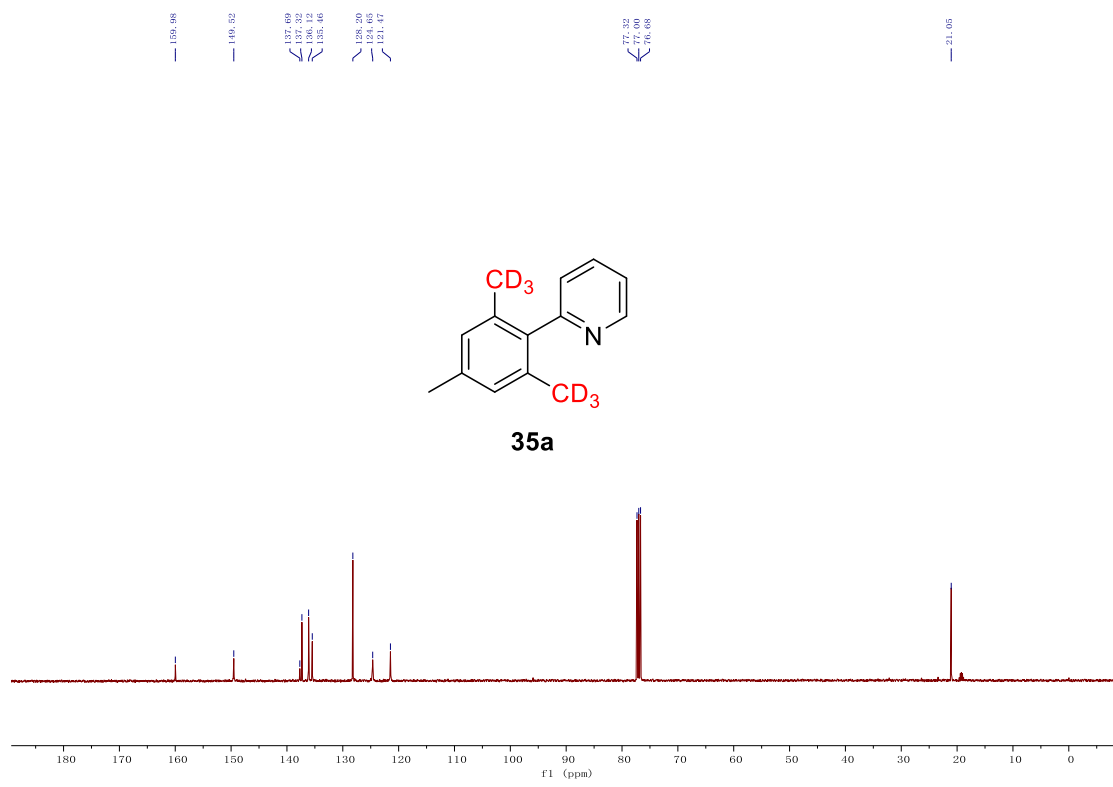

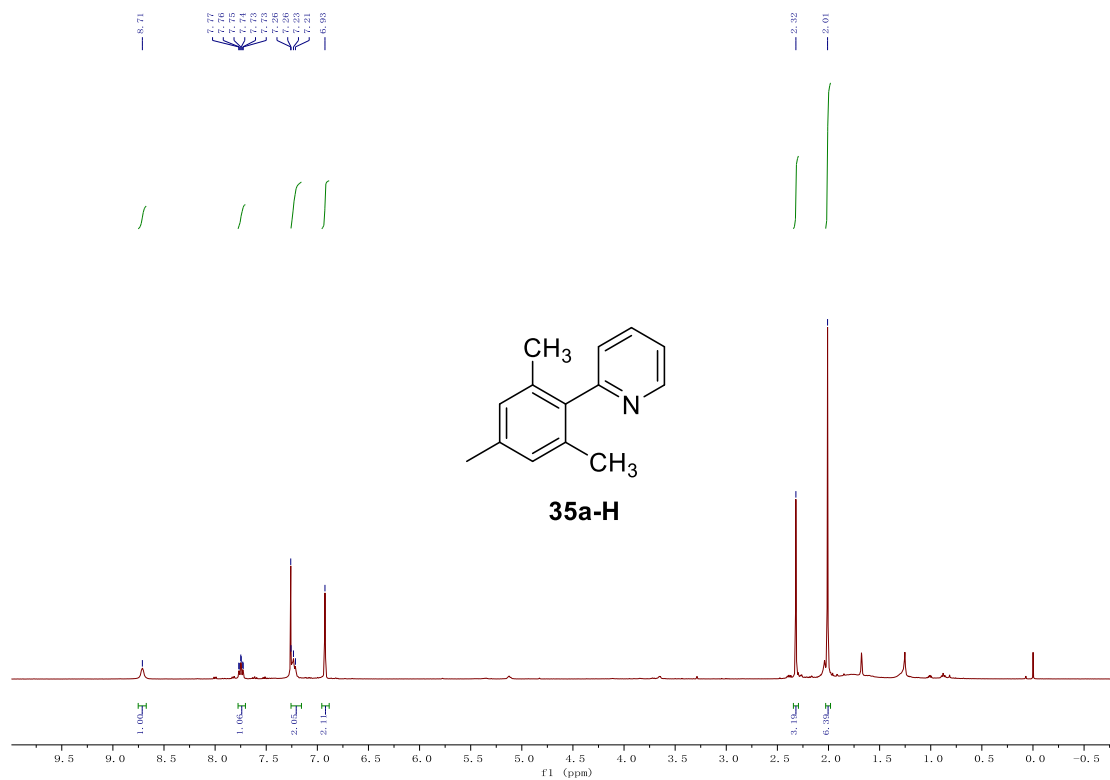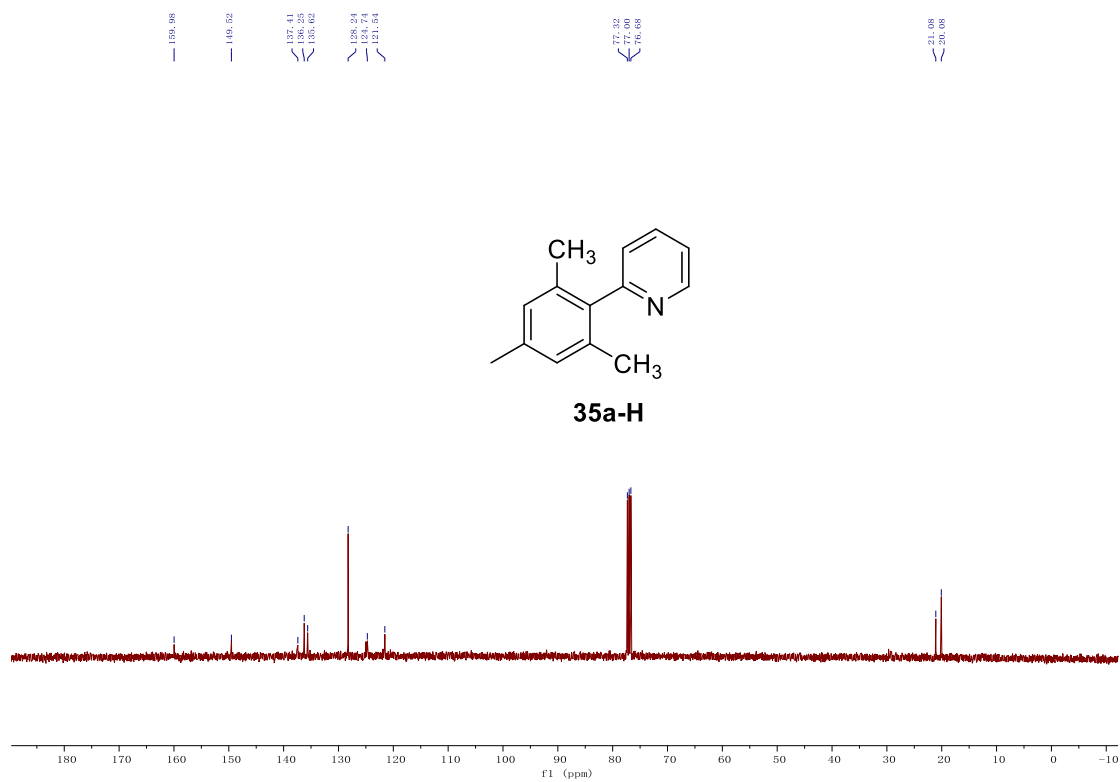

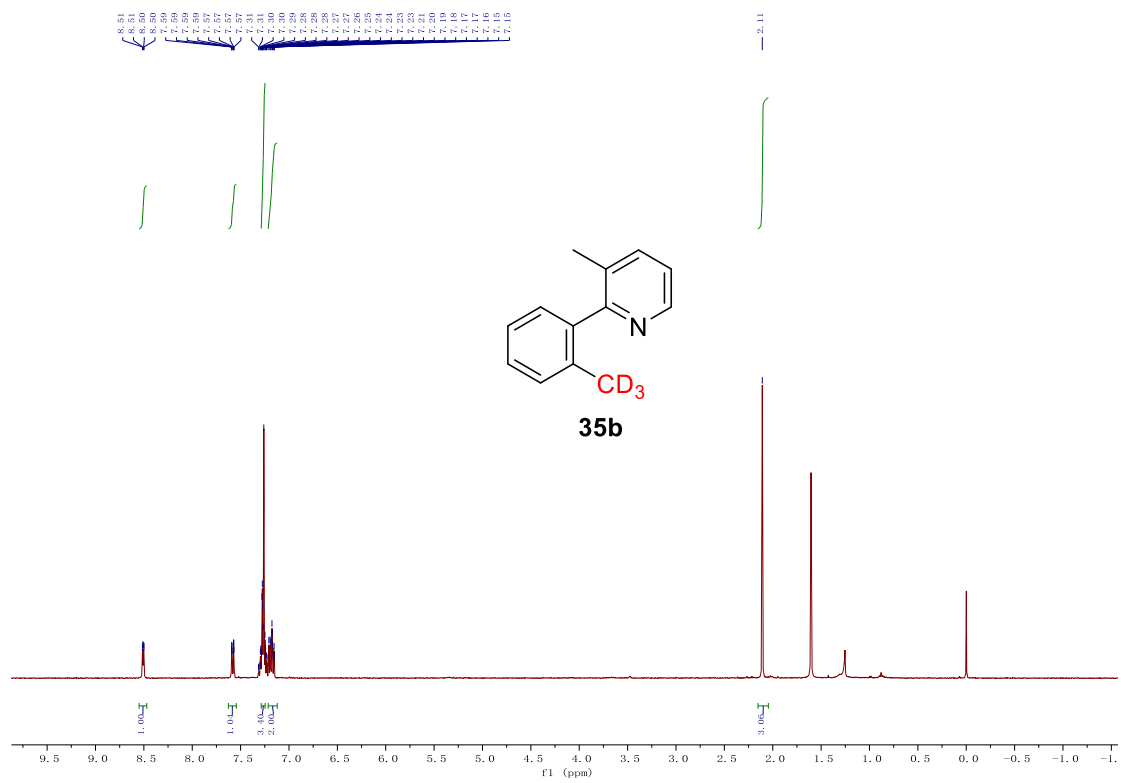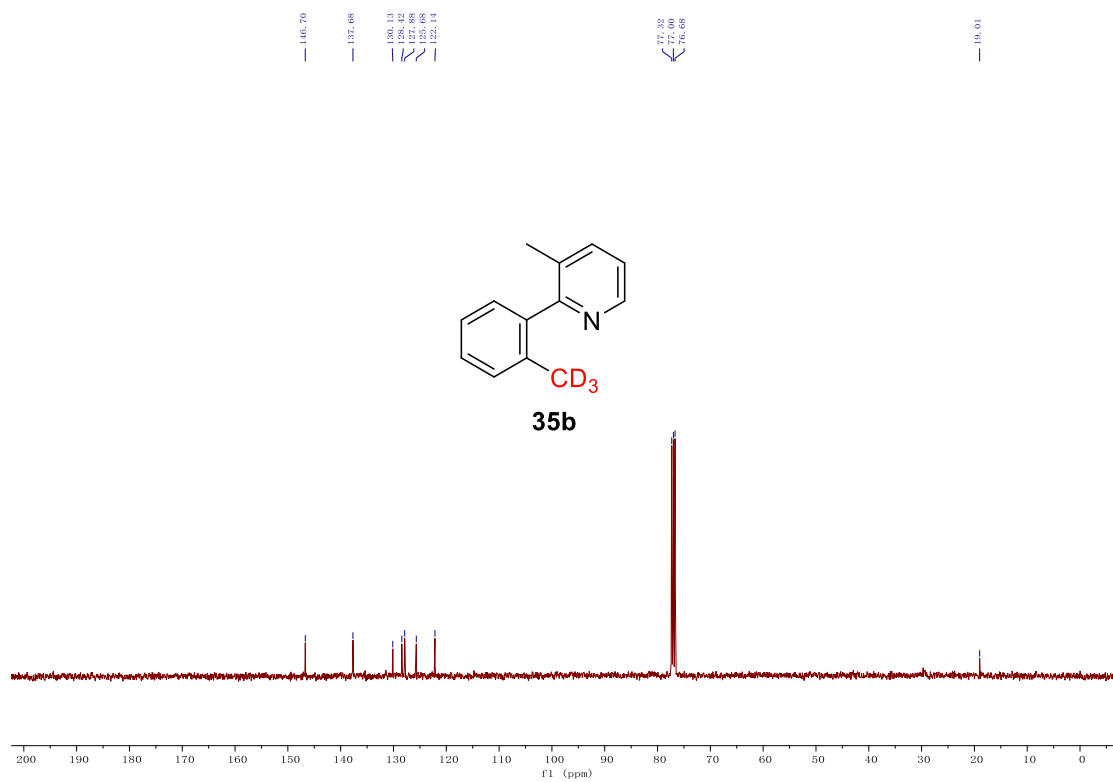

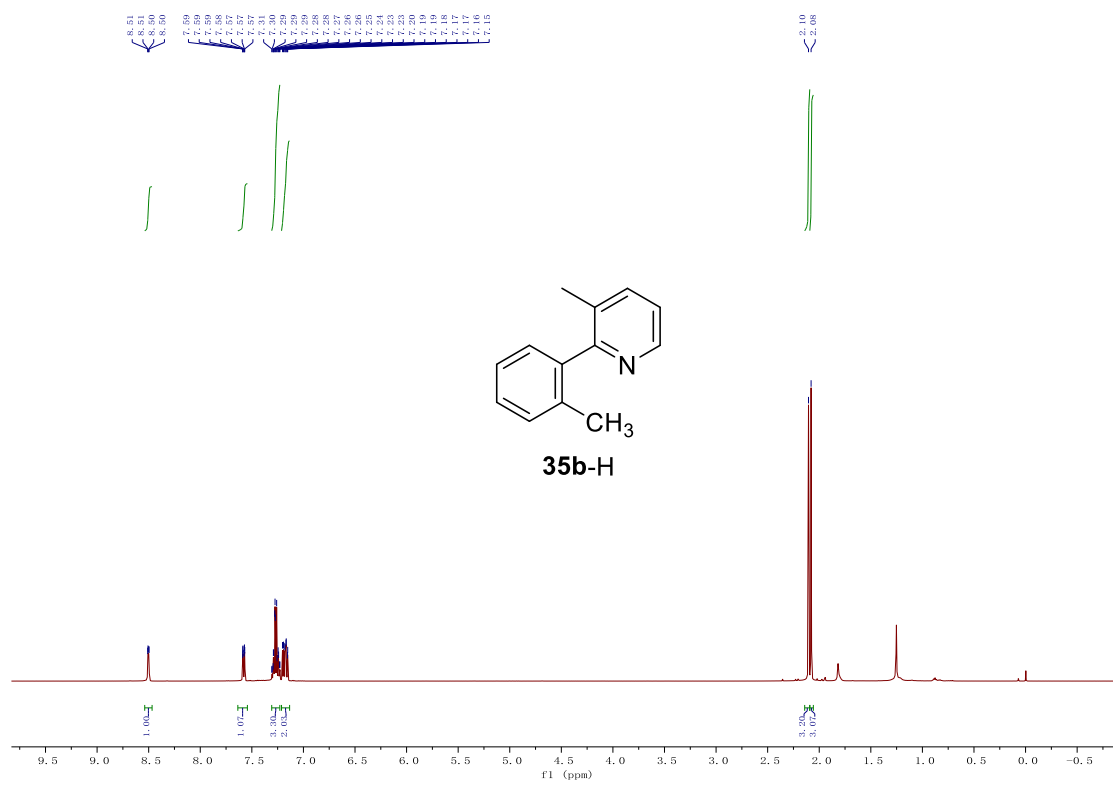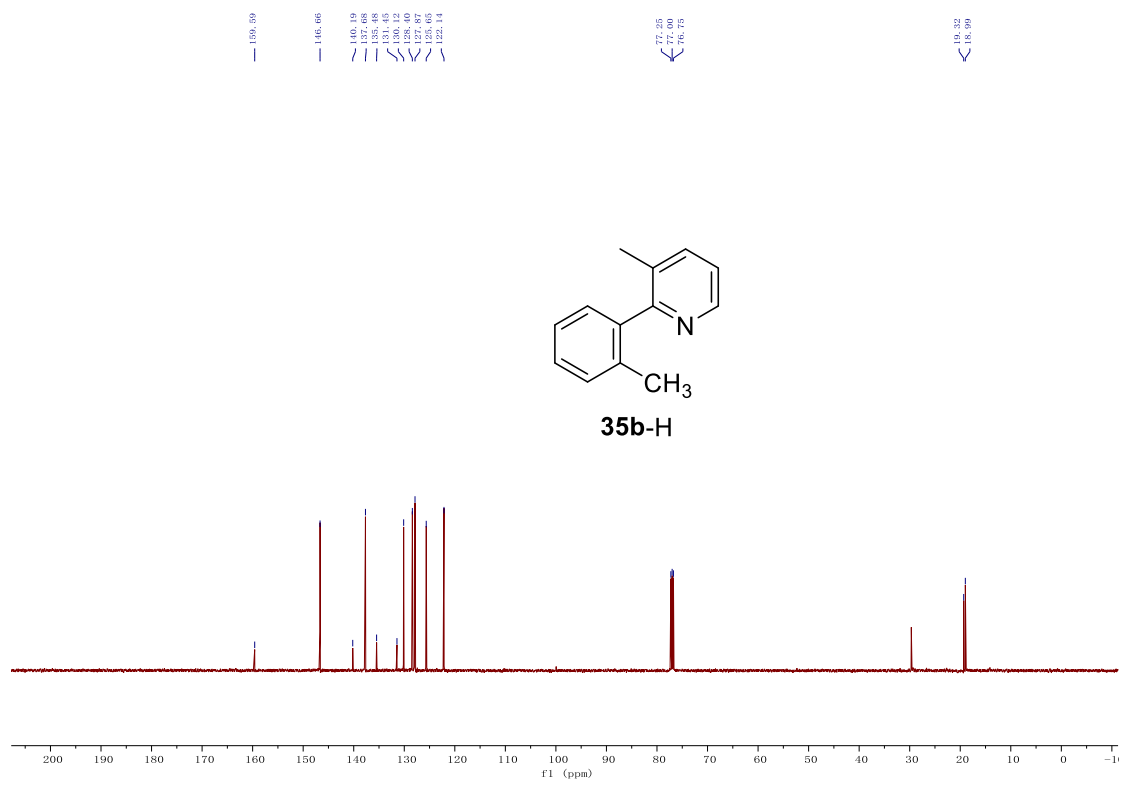



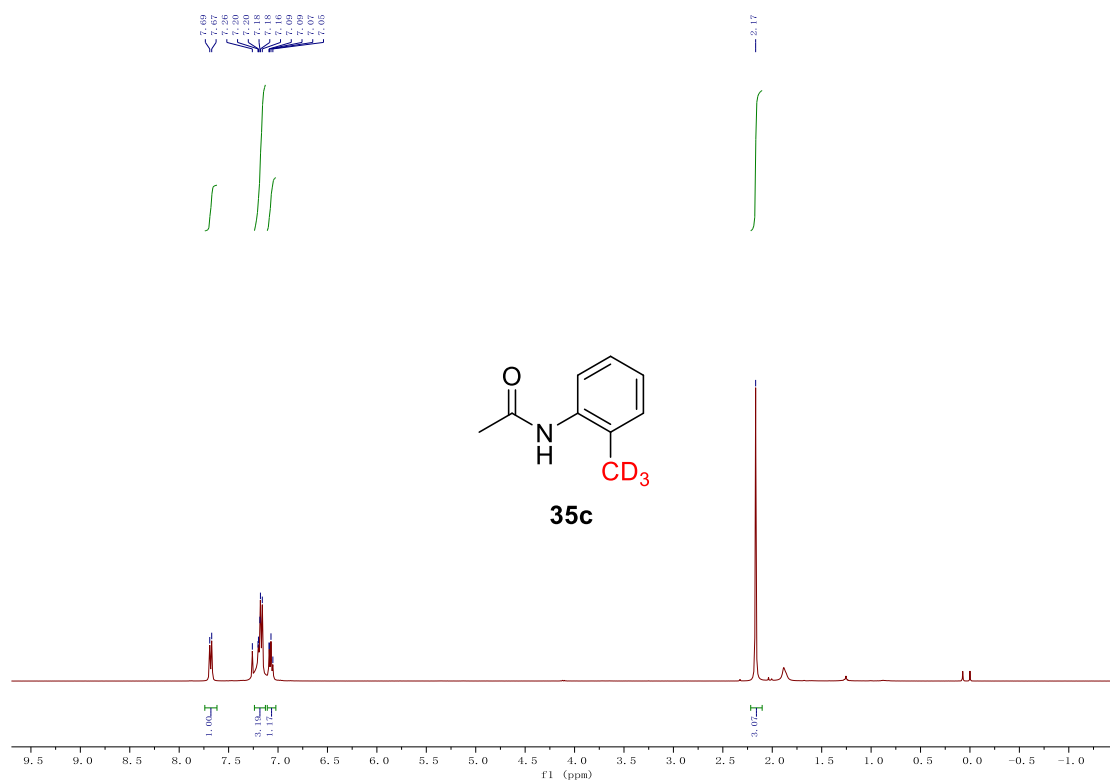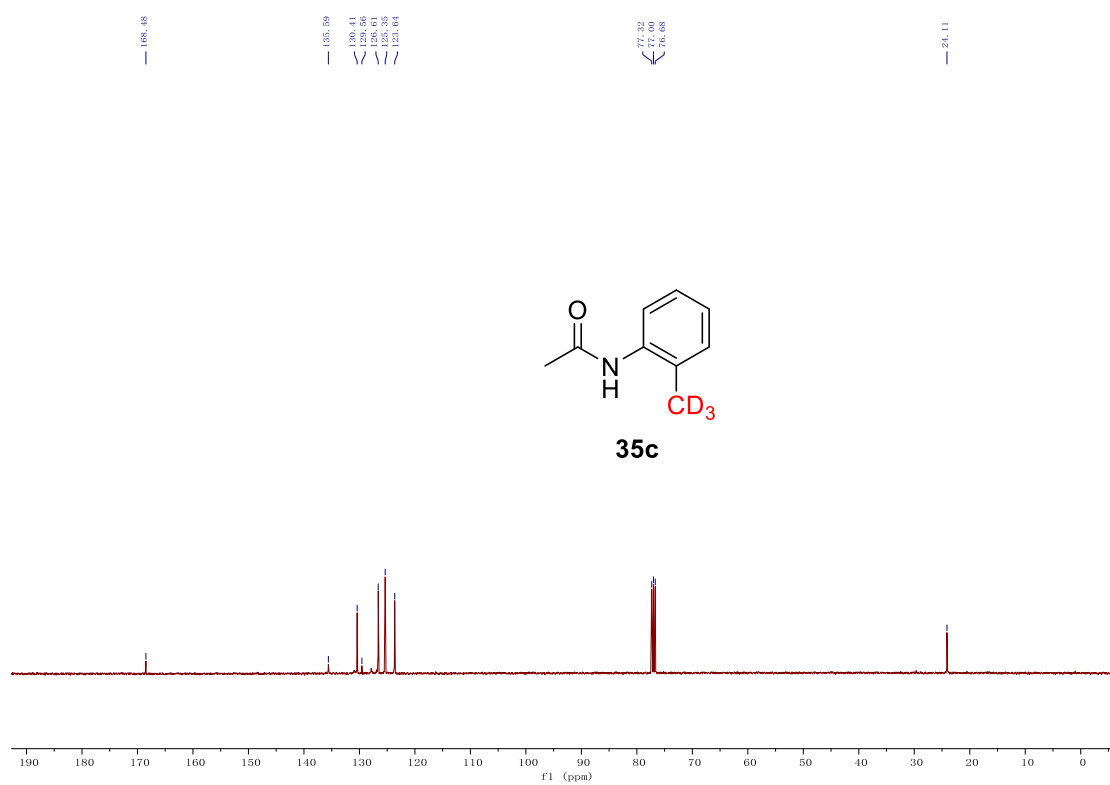

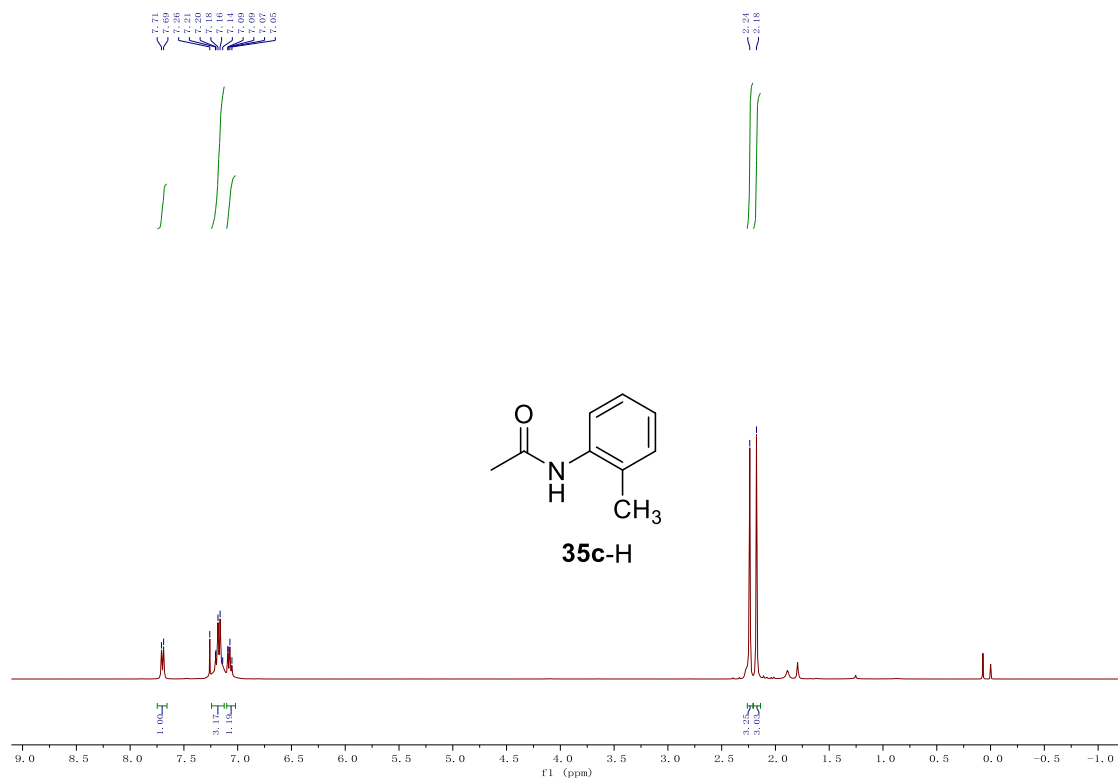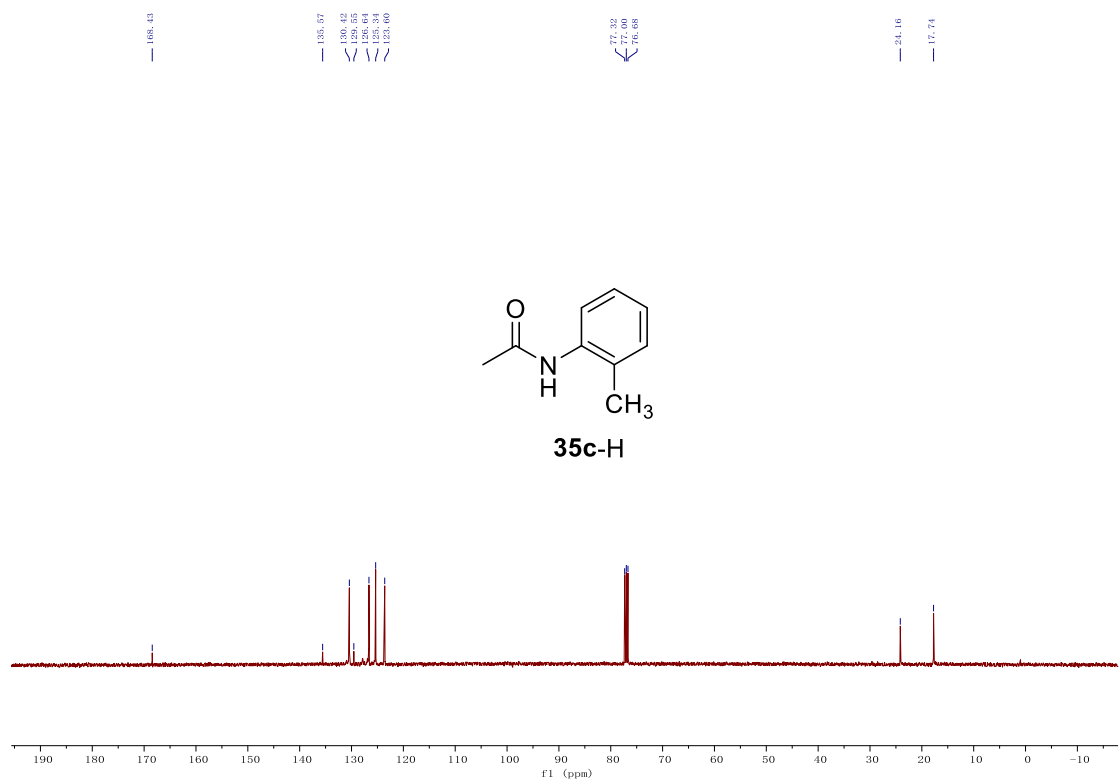

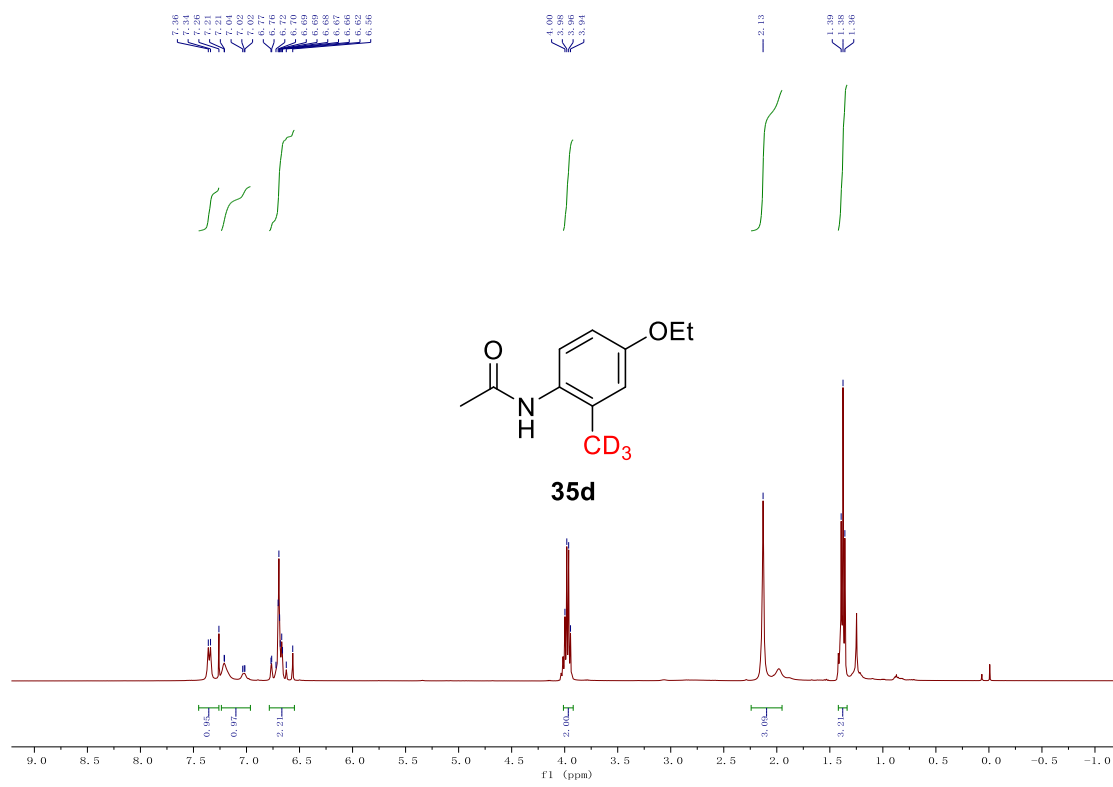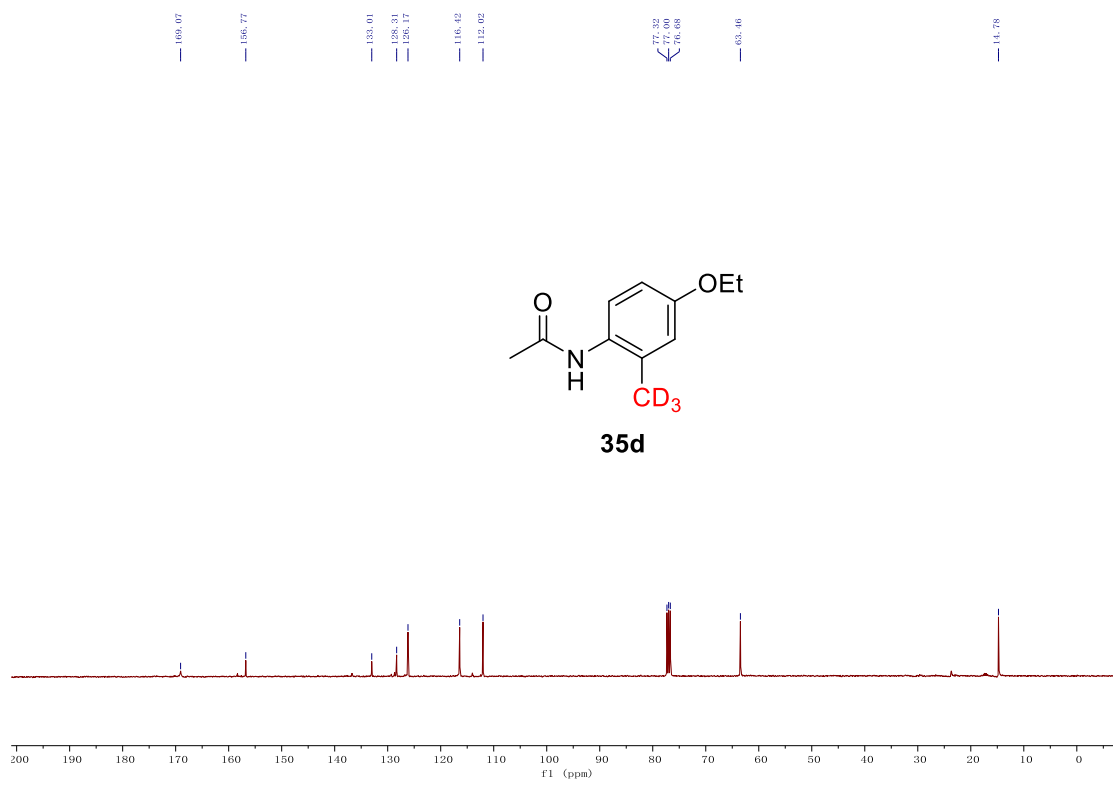

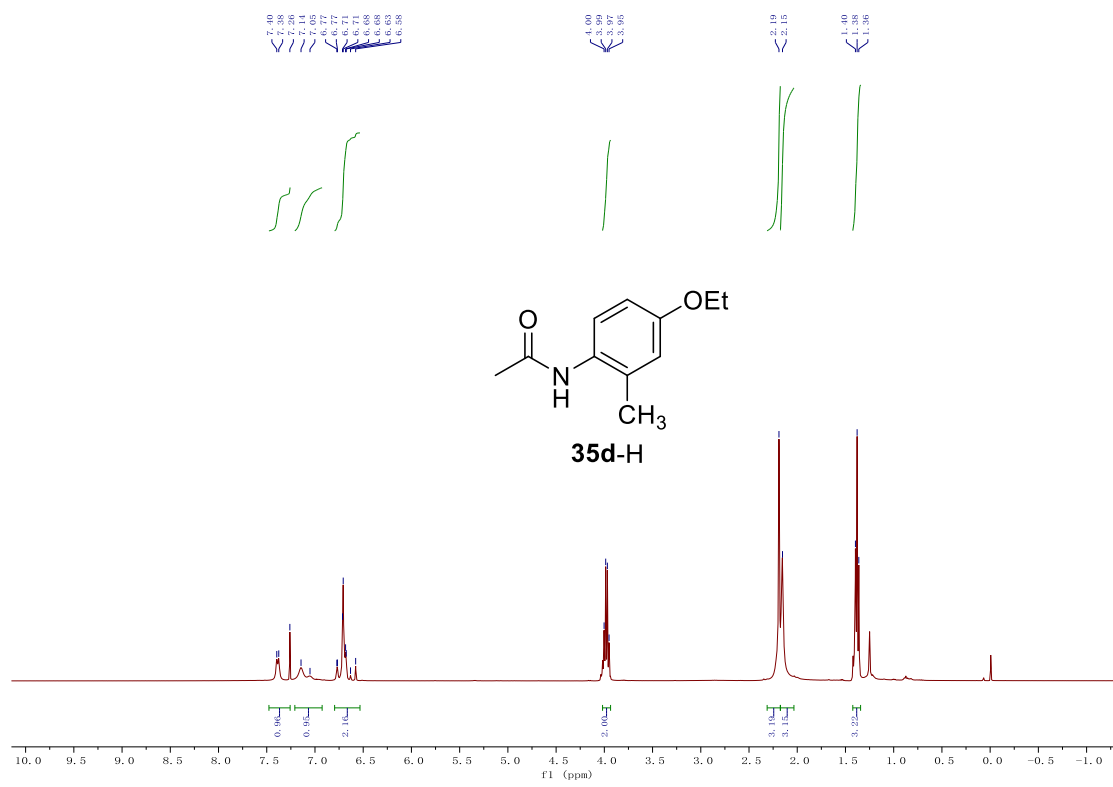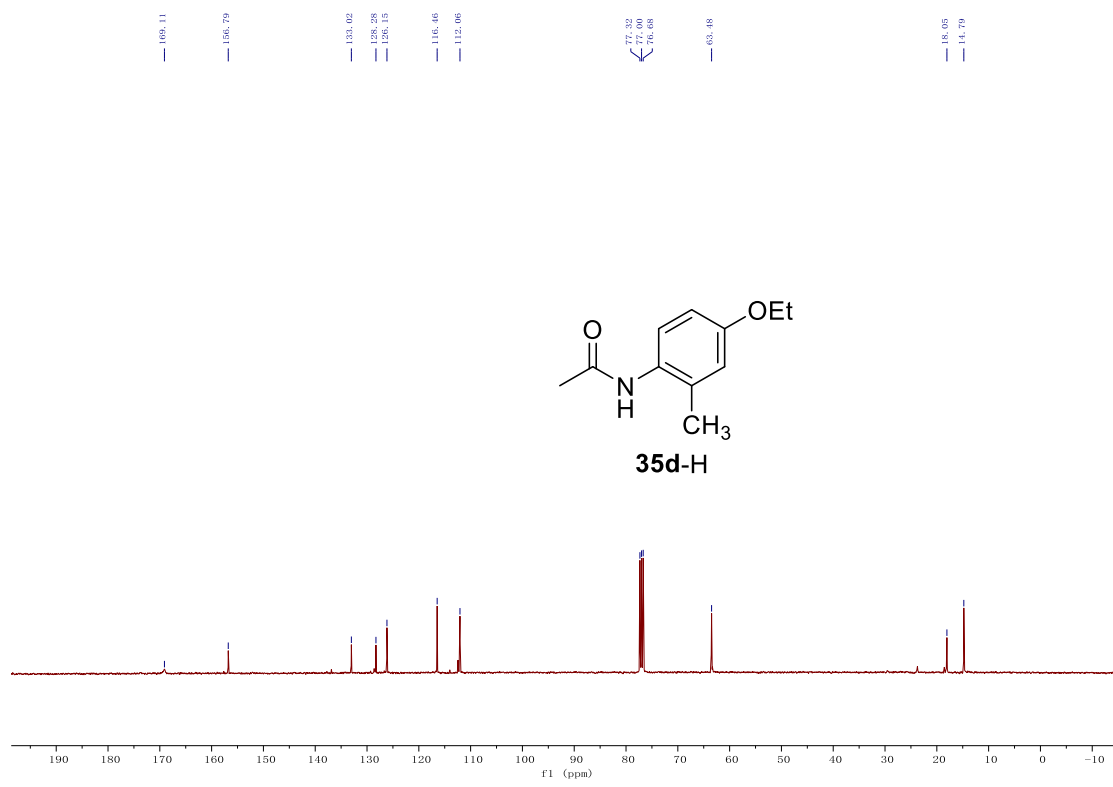

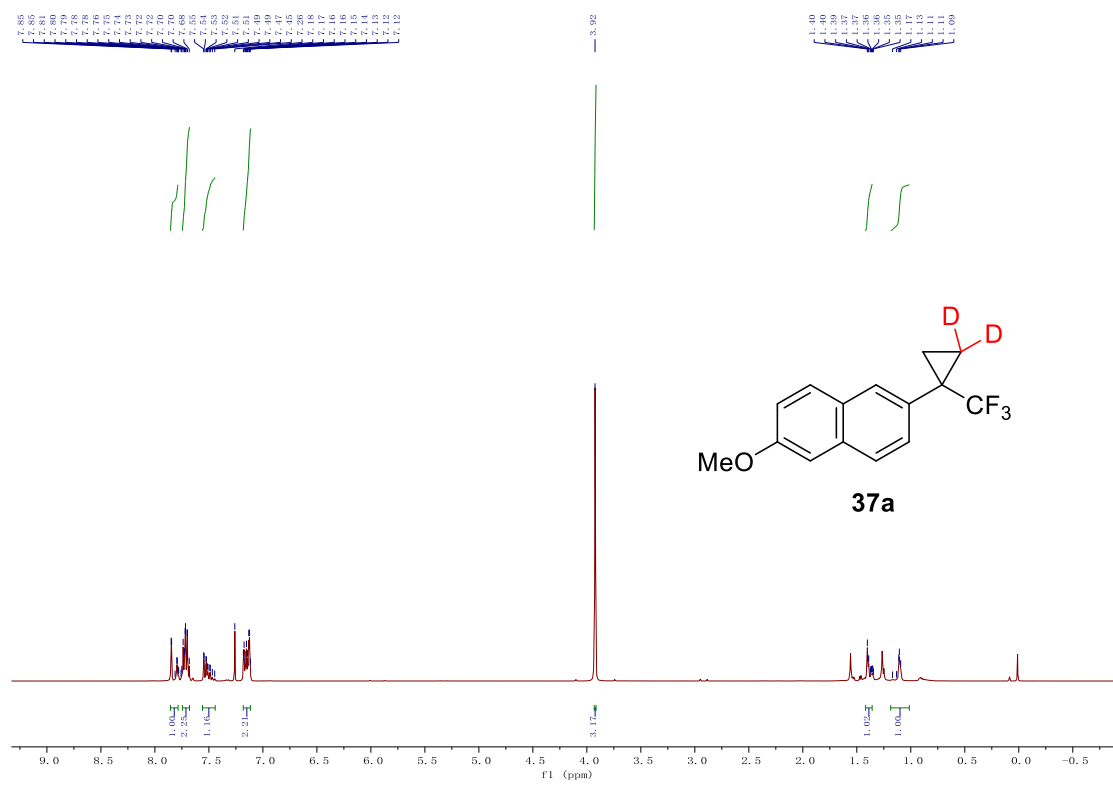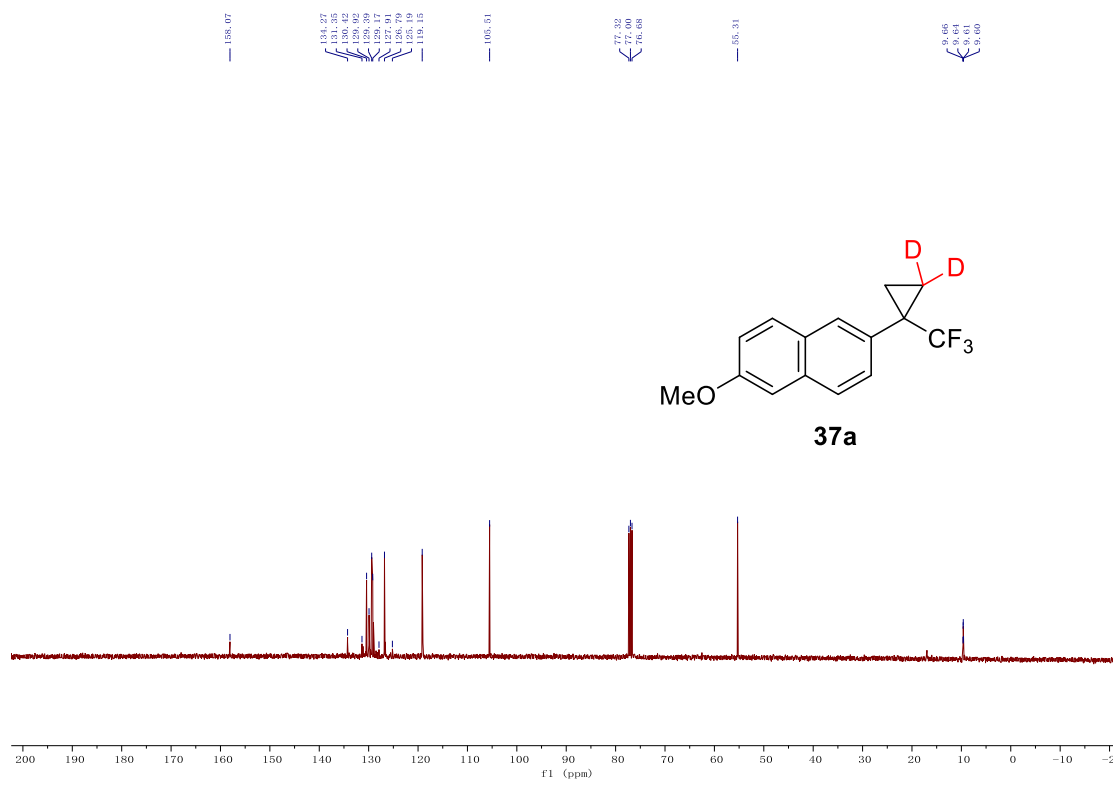

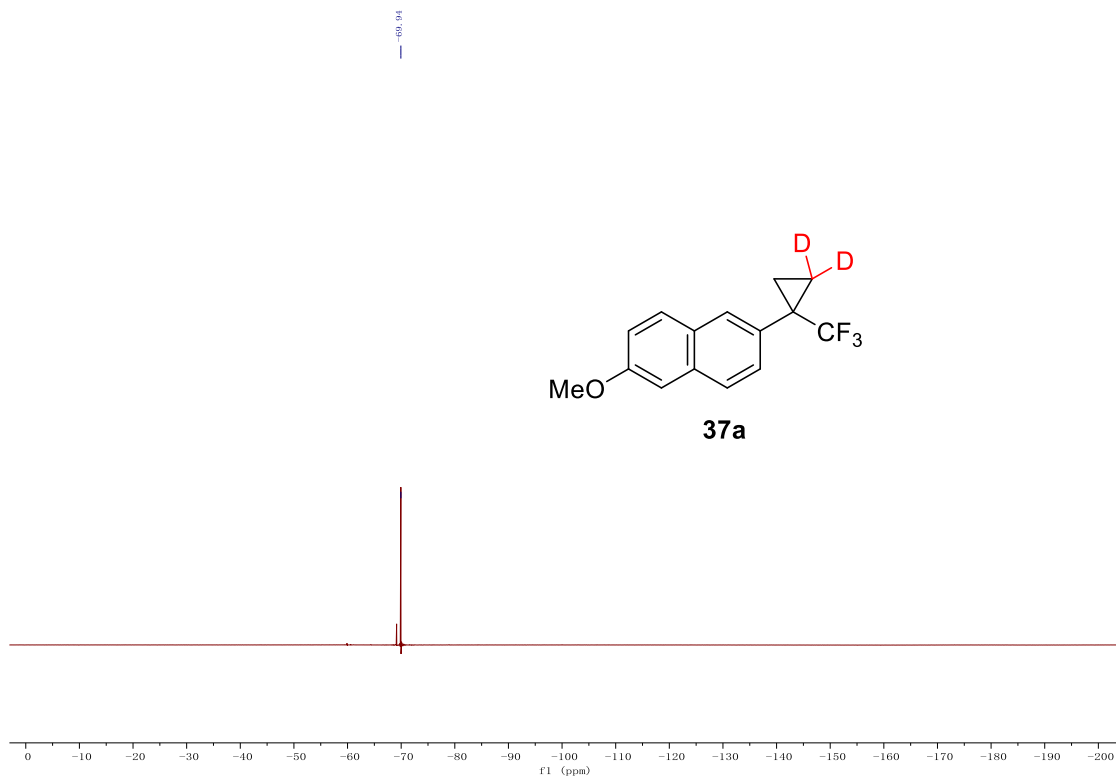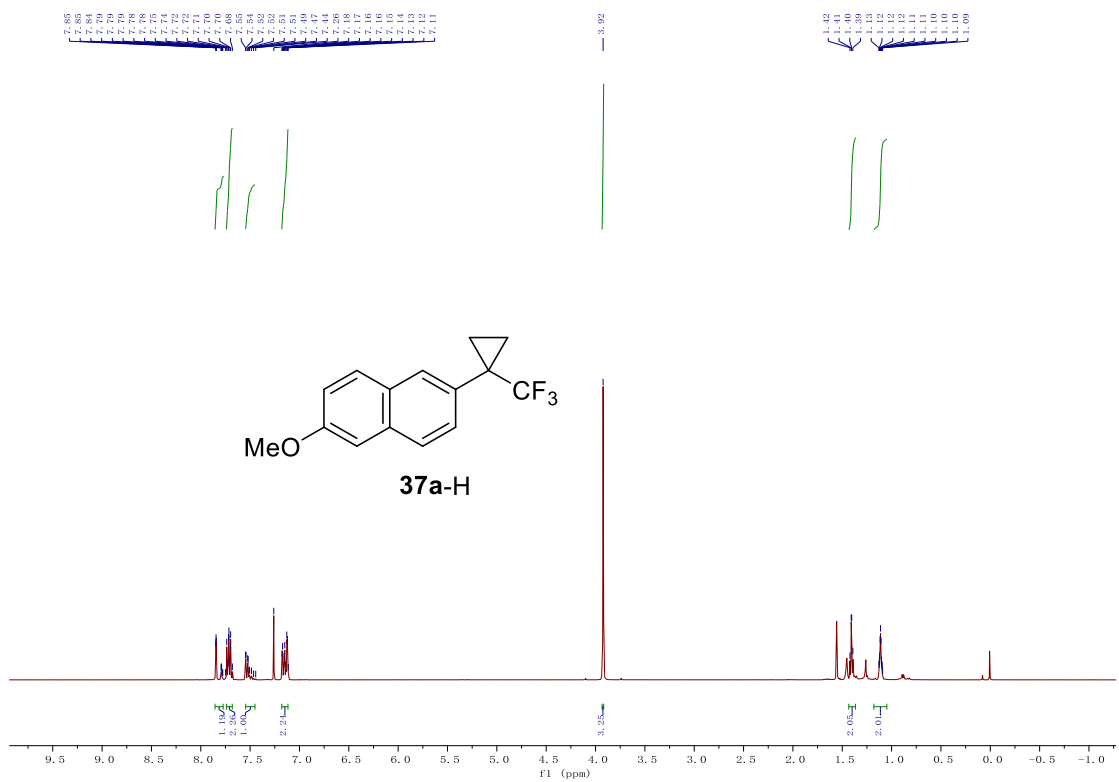

158.08  
134.27  
133.19  
129.94  
129.94  
128.39  
127.90  
127.90  
126.79  
119.48  
106.51  
77.32  
77.00  
76.68  
55.32  
5.85  
5.81  
5.81

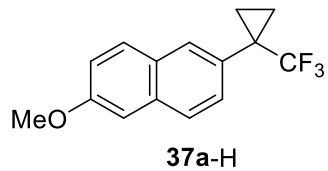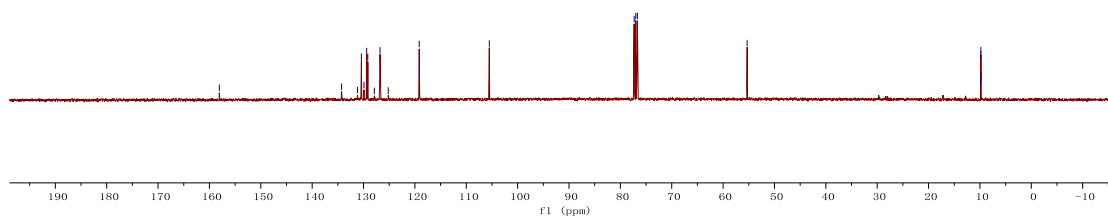

60.96

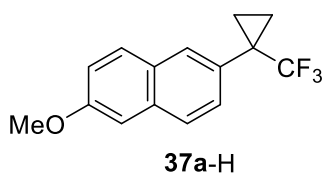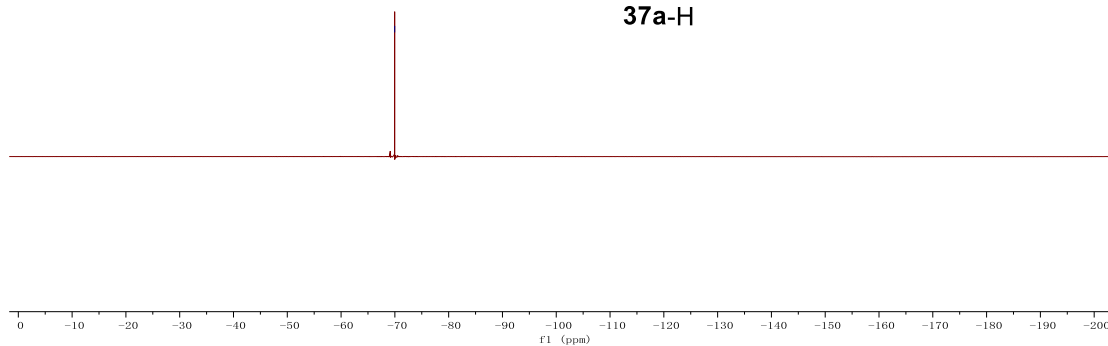

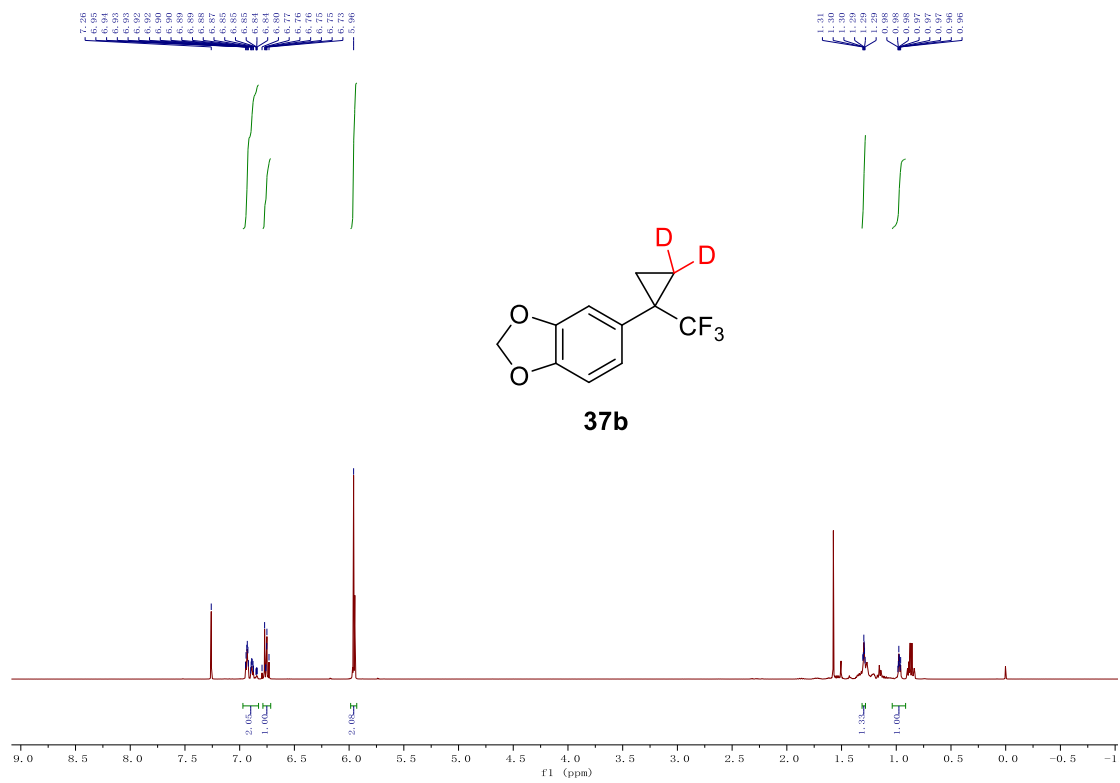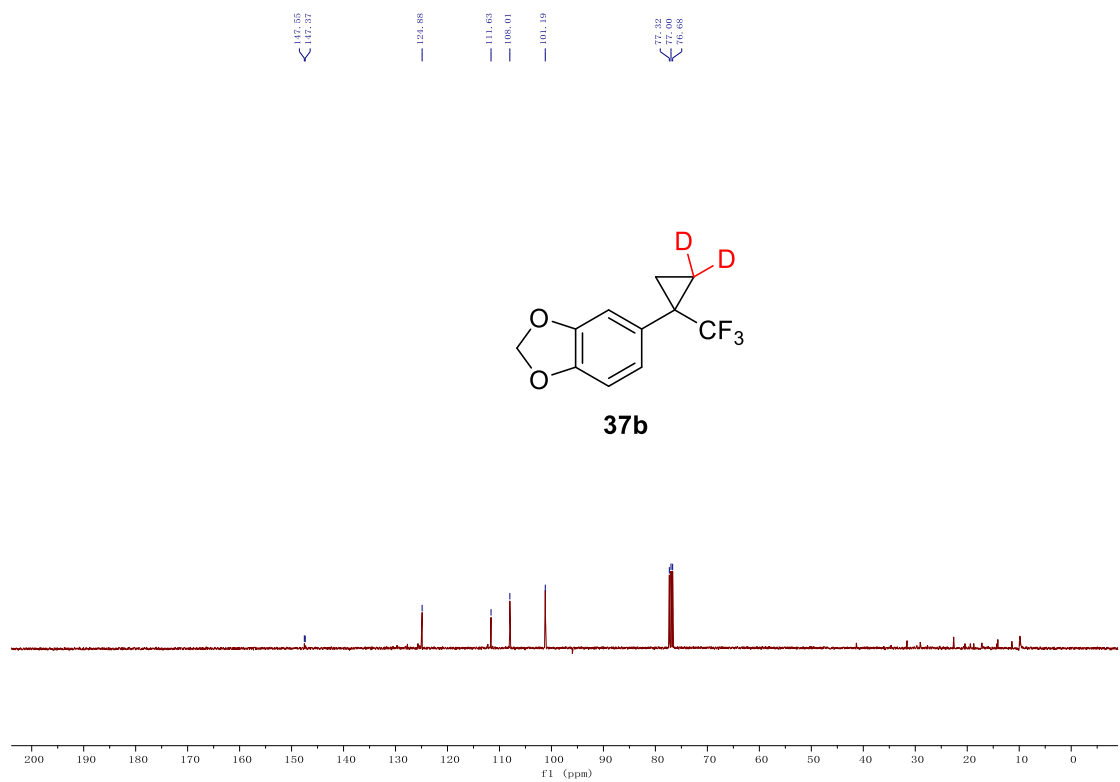



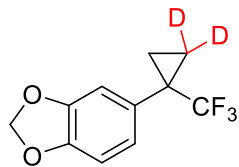

**37b**

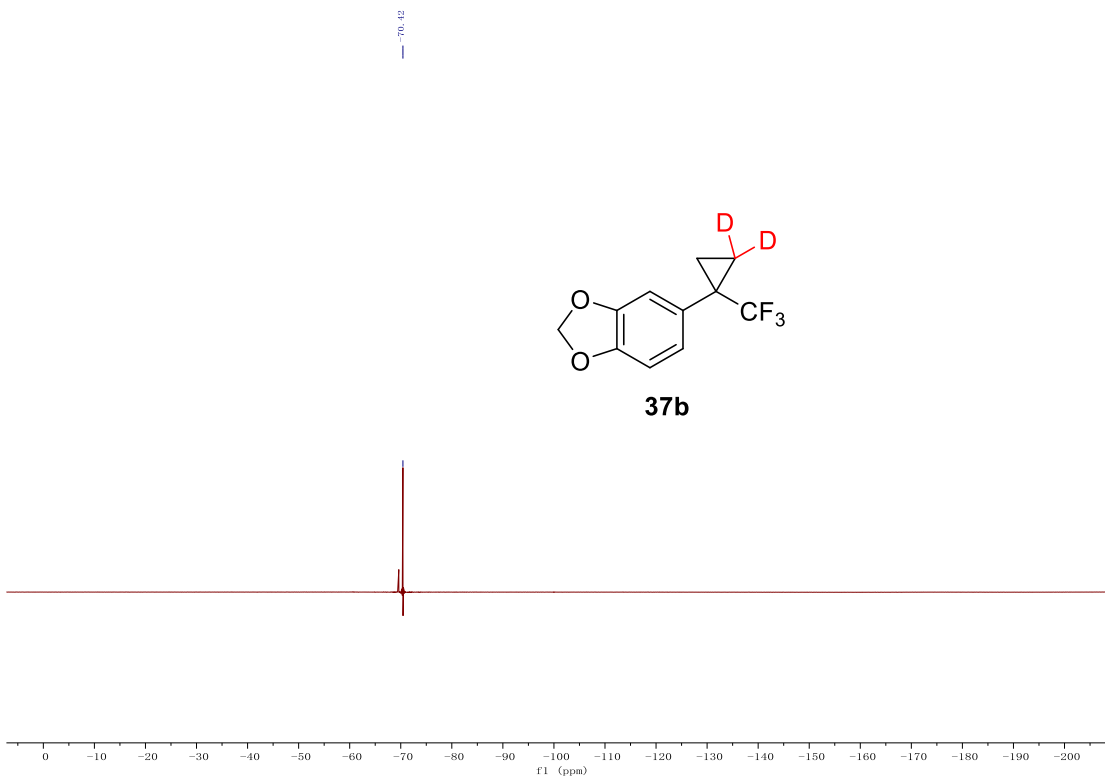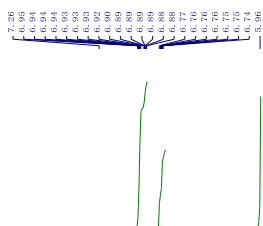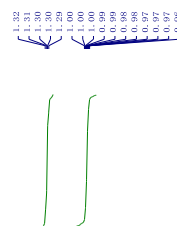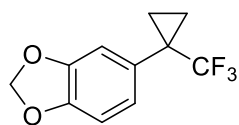

**37b-H**

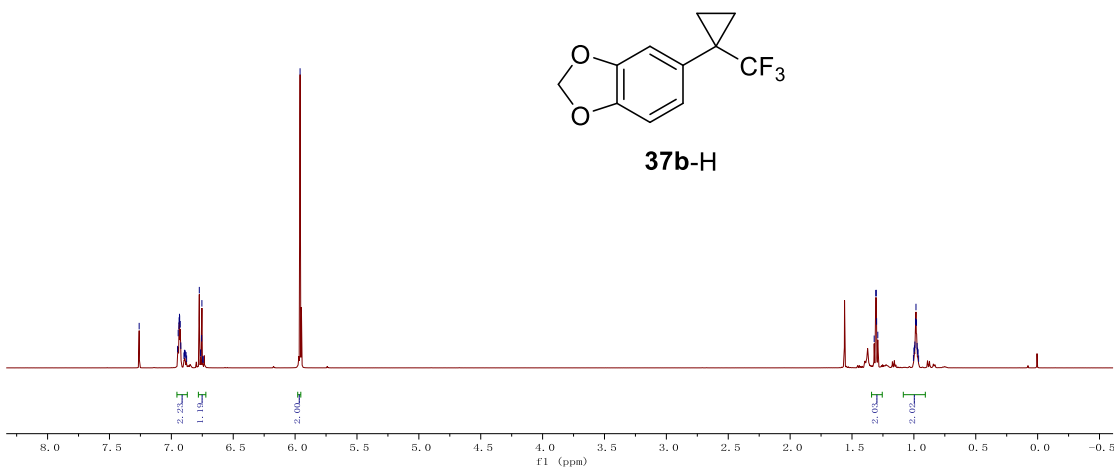

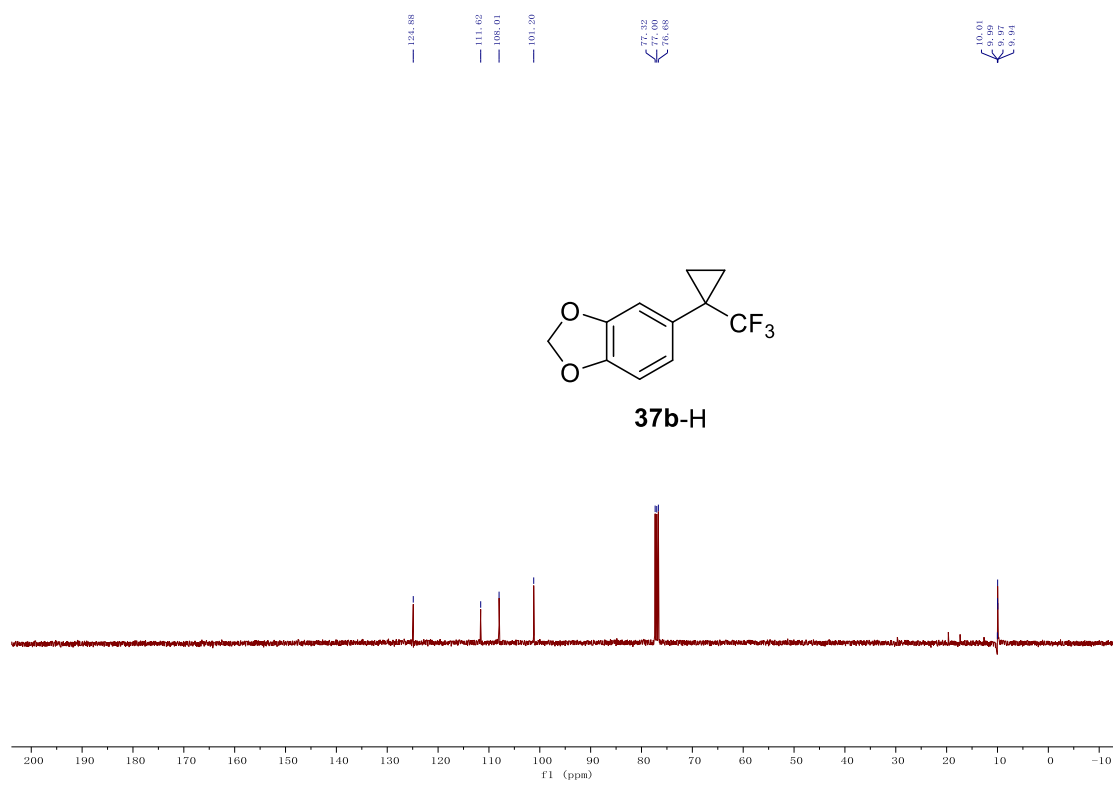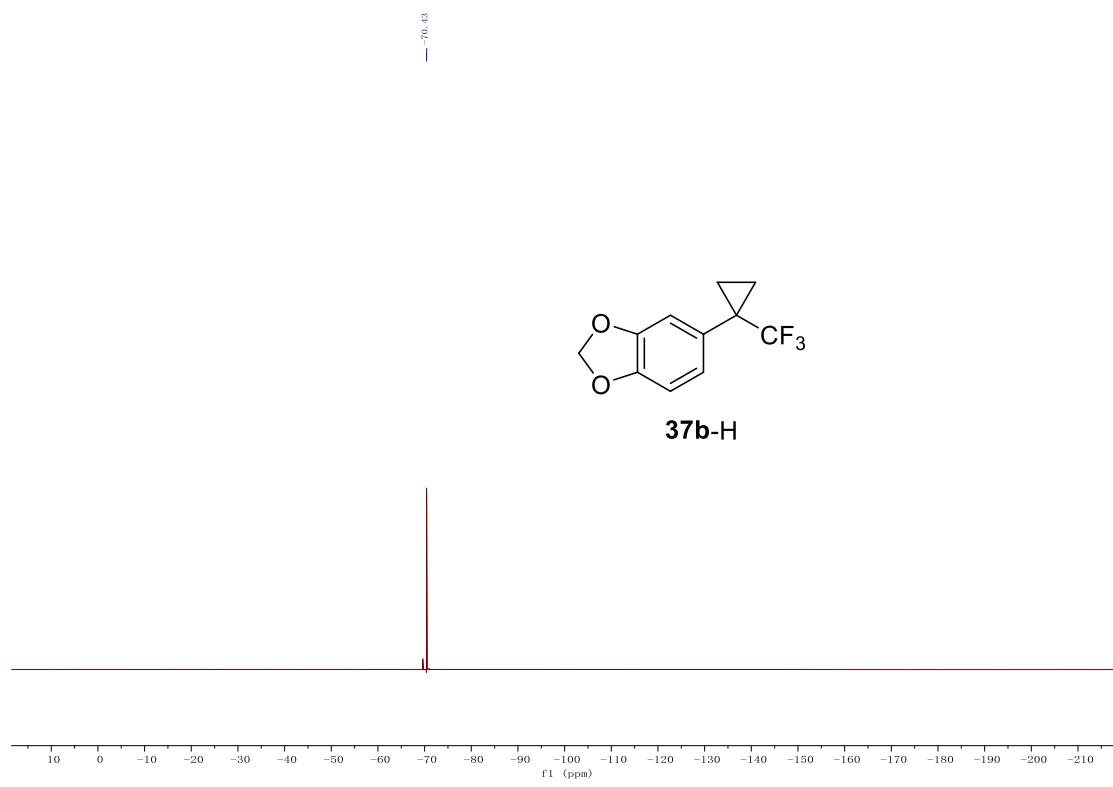

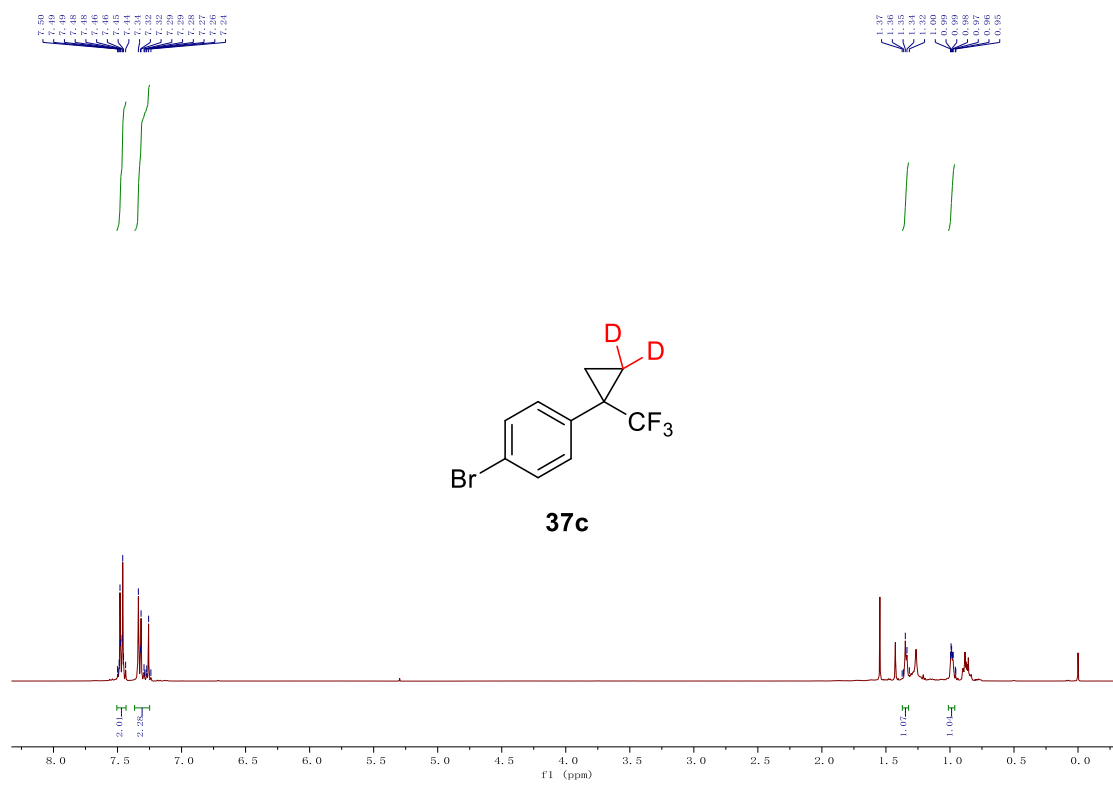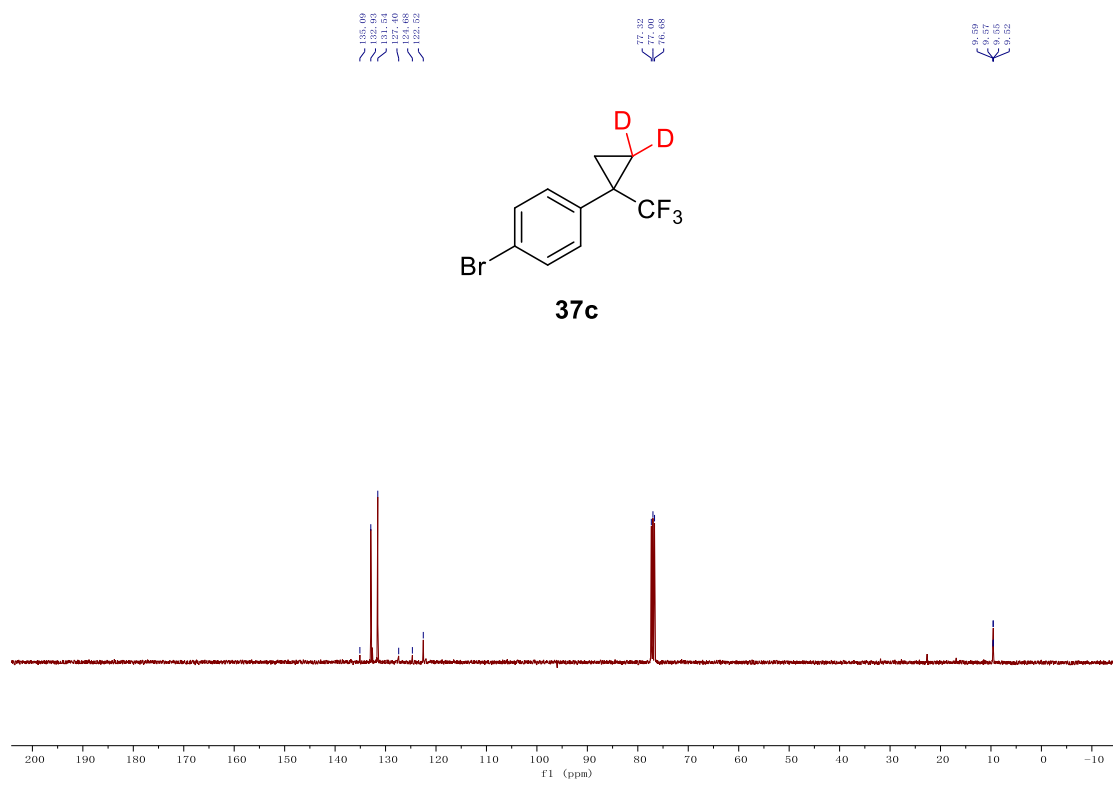

-70.21

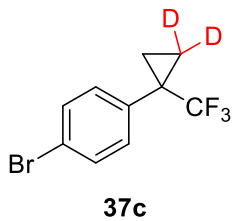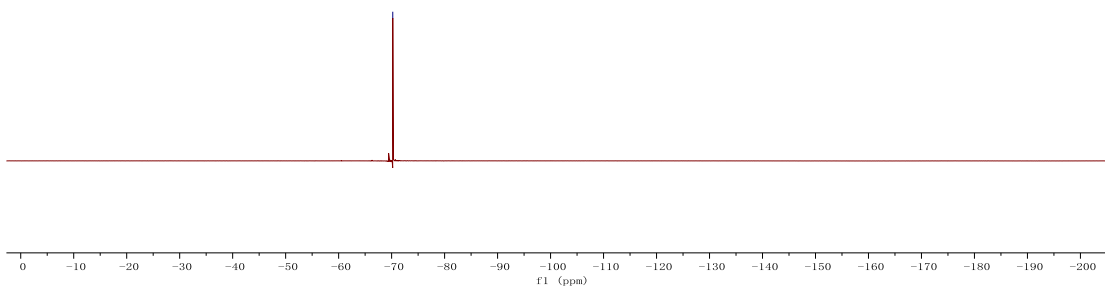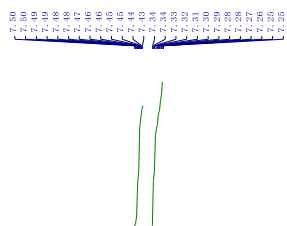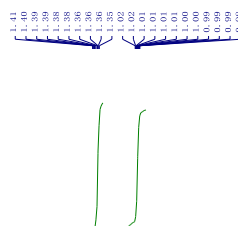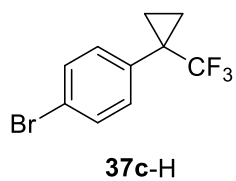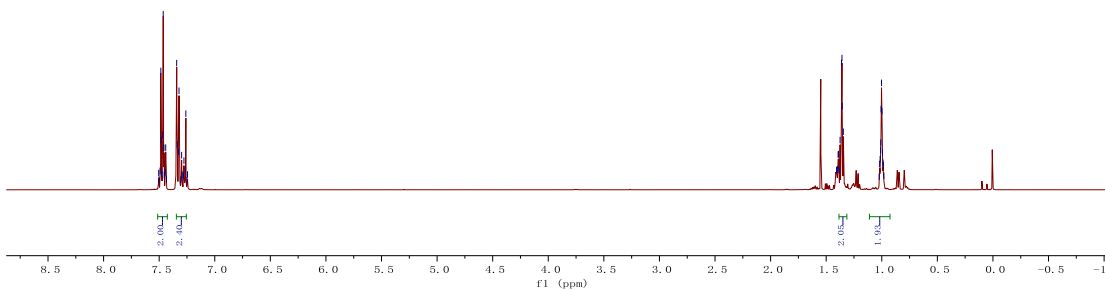

133.12  
133.02  
133.54  
127.60  
125.40  
122.83

77.32  
77.00  
76.68

9.76  
9.74

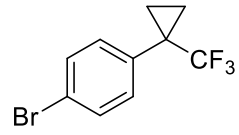

**37c-H**

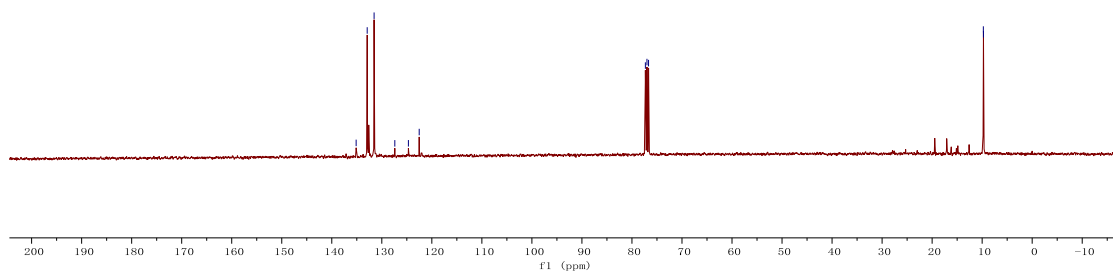

-70.22

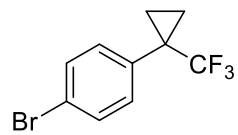

**37c-H**

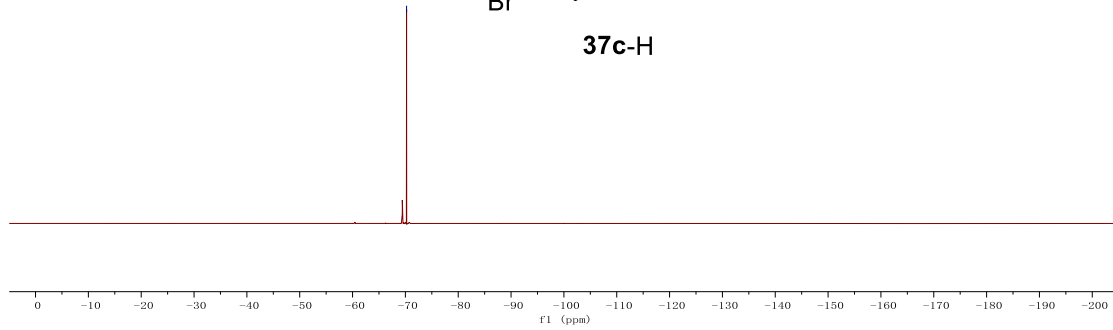

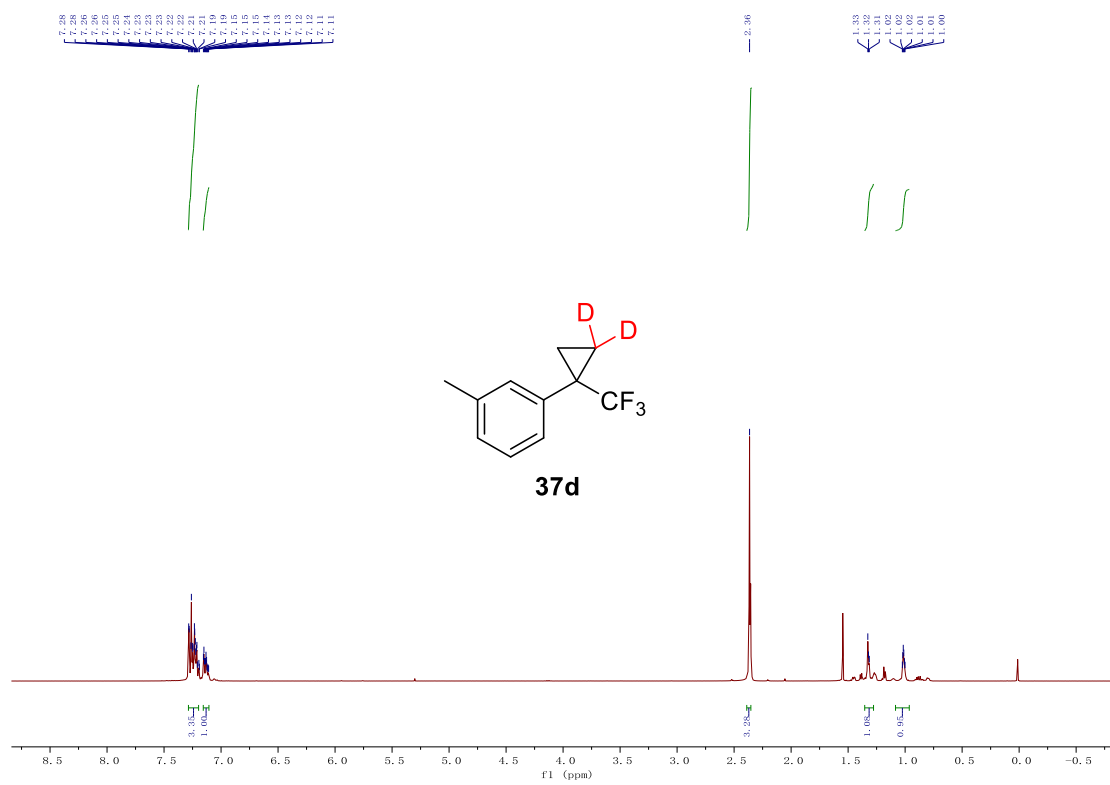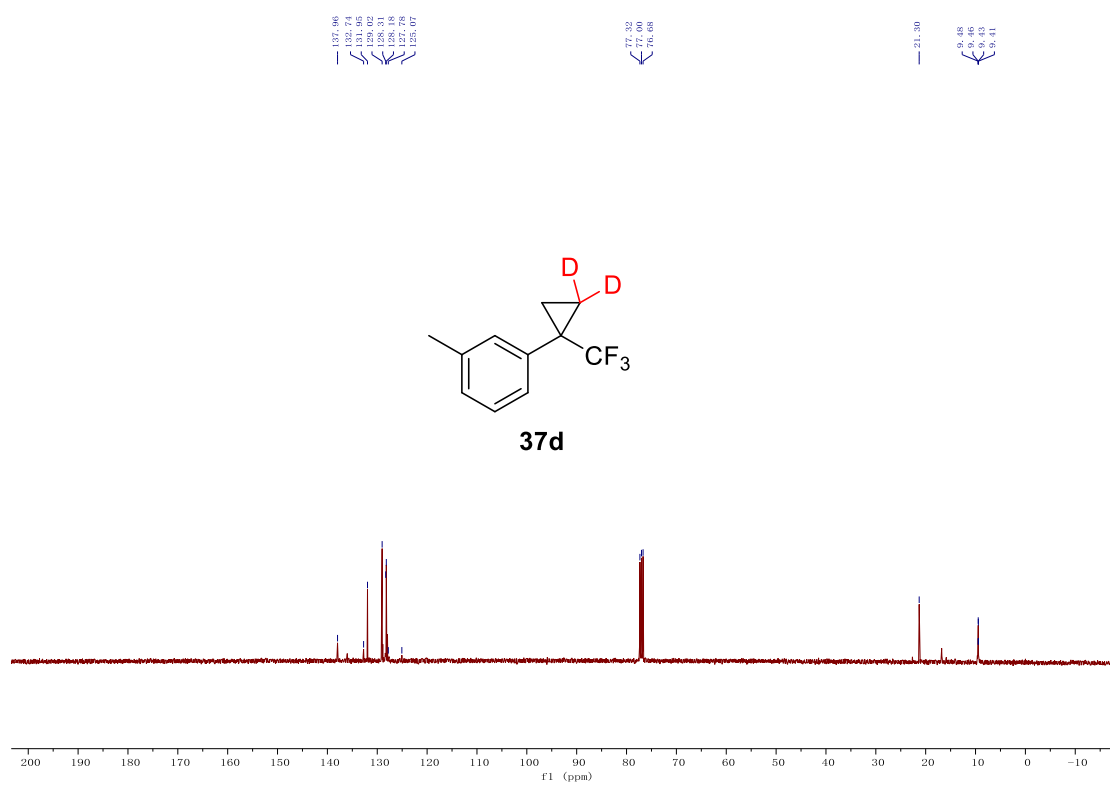

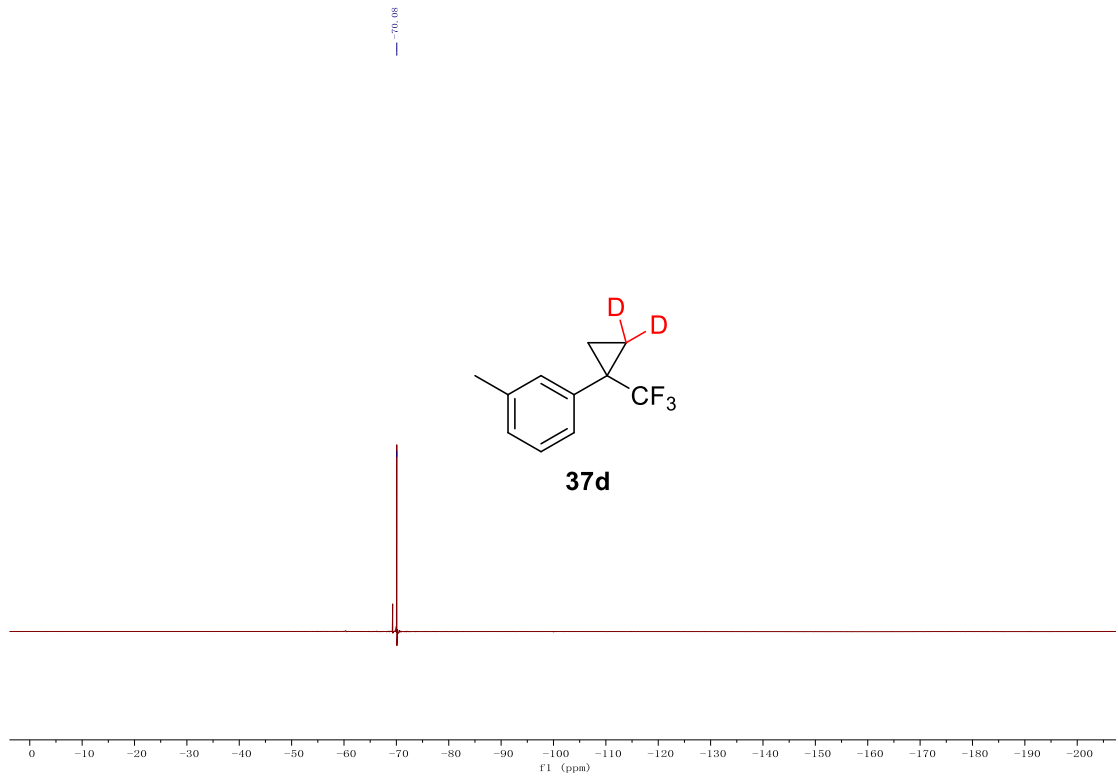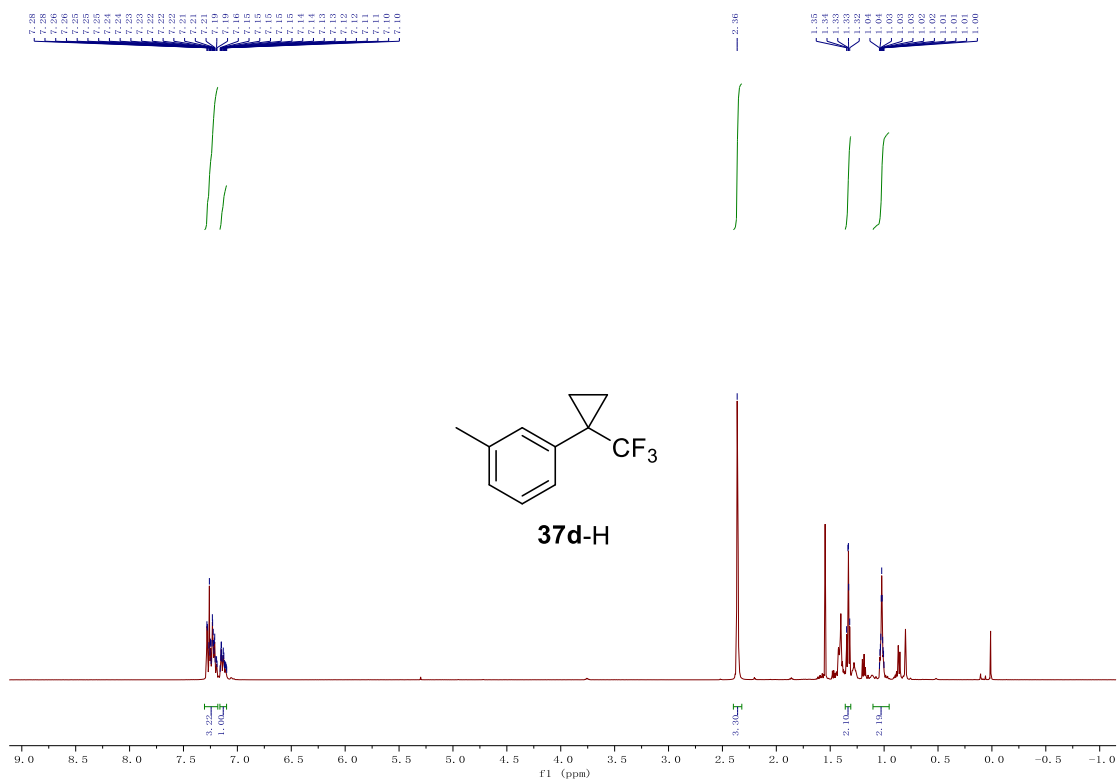

1337.96  
1337.72  
1337.49  
1299.62  
1288.30  
1277.78  
1255.06

77.32  
77.00  
76.68

21.30

9.45  
9.43

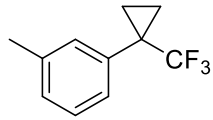

37d-H

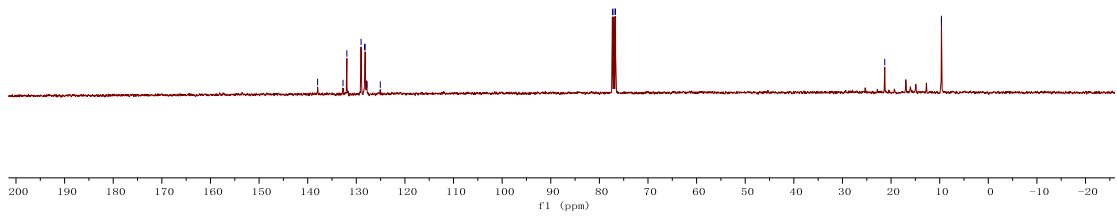

70.00

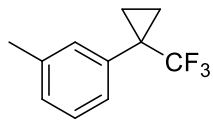

37d-H

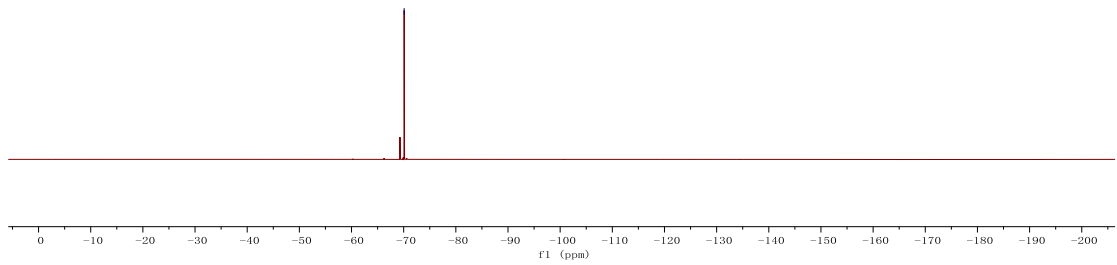

Supplement: aba0946_SM.pdf [file aba0946_SM.pdf]
